# Supplementary material for: Stabilization of GTSE1 by cyclin D1–CDK4/6-mediated phosphorylation promotes cell proliferation with implications for cancer prognosis
Source: eLife. 2025 Apr 24;13:RP101075. doi: 10.7554/eLife.101075 (PMC12021411; doi:10.7554/eLife.101075)
Supplement: Figure 2—source data 3. [file elife-101075-fig2-data3.xlsx]

## Sheet: CPTAC_expression_input 
Figure 2-source data 3. CPTAC log2(Intensities) across samples for global protein and phospho-proteins of interest (Fig. 2I)
samples	type	cohort	GTSE1	pGTSE1	pGTSE1_res (normalized to protein)	GTSE1-S157	GTSE1-S171	GTSE1-S187	GTSE1-S247	GTSE1-S262	GTSE1-S264	GTSE1-S322	GTSE1-S330	GTSE1-S331	GTSE1-S345	GTSE1-S415	GTSE1-S434	GTSE1-S454	GTSE1-S476	GTSE1-S480	GTSE1-S480T485	GTSE1-S483	GTSE1-S496	GTSE1-S499	GTSE1-S514	GTSE1-S539	GTSE1-S555	GTSE1-S582	GTSE1-S594	GTSE1-S594S599	GTSE1-S594S599S602	GTSE1-S594S602	GTSE1-S594S611	GTSE1-S599	GTSE1-S599S602	GTSE1-S599S602S611	GTSE1-S602	GTSE1-S602S611	GTSE1-S611	GTSE1-S724	GTSE1-S734	GTSE1-T200	GTSE1-T344	GTSE1-T508	VIM	MCM2	E2F1	CCNE1	CCND1
01BR001-T	Tumor	BRCA	19.2026	19.1316	1.04584	NA	NA	NA	NA	NA	NA	NA	NA	NA	NA	NA	NA	NA	NA	NA	NA	NA	18.1866	NA	NA	NA	19.3537	NA	19.8543	NA	NA	NA	NA	NA	NA	NA	NA	NA	NA	NA	NA	NA	NA	NA	33.0779	25.5897	17.224	NA	22.4275
01BR008-T	Tumor	BRCA	20.5776	19.0768	0.910084	20.0572	NA	16.6667	NA	NA	NA	NA	NA	NA	16.0295	NA	NA	19.9919	NA	NA	NA	NA	19.5349	NA	NA	NA	NA	NA	21.3131	19.9444	NA	NA	NA	NA	NA	NA	NA	NA	NA	NA	NA	NA	NA	NA	32.1317	25.9883	NA	NA	21.5907
01BR009-T	Tumor	BRCA	20.6601	18.7659	0.594349	19.7706	NA	16.7323	NA	NA	NA	NA	NA	NA	15.0589	NA	NA	19.7124	NA	NA	NA	NA	19.529	NA	NA	NA	NA	NA	20.8773	19.6811	NA	NA	NA	NA	NA	NA	NA	NA	NA	NA	NA	NA	NA	NA	32.455	26.1169	NA	NA	21.9999
01BR010-T	Tumor	BRCA	19.9162	18.1956	0.0678459	18.19	17.5713	16.6202	NA	19.9982	NA	NA	NA	NA	NA	NA	NA	17.5778	NA	NA	NA	NA	NA	NA	NA	NA	18.6972	NA	20.446	18.6081	NA	NA	NA	NA	NA	NA	16.052	NA	NA	NA	NA	NA	NA	NA	32.786	25.5433	16.3726	NA	22.7751
01BR015-T	Tumor	BRCA	19.3165	18.8839	0.791476	NA	NA	NA	NA	NA	NA	NA	NA	NA	NA	NA	NA	NA	NA	NA	NA	NA	17.7542	NA	NA	NA	18.7204	NA	20.1771	NA	NA	NA	NA	NA	NA	NA	NA	NA	NA	NA	NA	NA	NA	NA	32.8425	25.598	16.5601	NA	22.4726
01BR017-T	Tumor	BRCA	20.3298	19.6309	1.47877	18.0072	NA	NA	NA	20.2243	NA	NA	NA	NA	NA	NA	NA	NA	NA	NA	NA	NA	18.7039	NA	NA	NA	NA	NA	20.8582	20.361	NA	NA	NA	NA	NA	NA	NA	NA	NA	NA	NA	NA	NA	NA	32.2605	26.4851	NA	19.201	22.2573
01BR018-T	Tumor	BRCA	21.3861	18.751	0.536644	18.1906	17.1595	16.9953	NA	20.8055	20.0987	NA	NA	NA	NA	NA	NA	18.8621	NA	NA	NA	NA	19.5084	NA	NA	17.748	19.4635	NA	21.1217	19.6371	NA	NA	NA	NA	NA	NA	NA	NA	16.8567	NA	NA	NA	NA	17.3158	31.8624	26.6086	NA	NA	22.7752
01BR020-T	Tumor	BRCA	22.0271	19.3937	1.14162	19.4044	17.2149	16.7348	NA	21.5458	NA	NA	NA	NA	NA	NA	NA	20.821	NA	NA	NA	NA	20.0623	NA	NA	NA	19.2822	NA	21.6442	20.1573	NA	NA	NA	NA	NA	NA	17.0704	NA	NA	NA	NA	NA	NA	NA	32.1478	26.3837	16.5752	NA	22.1446
01BR023-T	Tumor	BRCA	19.7556	18.0012	-0.117101	17.7694	17.5342	16.4115	NA	19.5189	NA	NA	NA	NA	NA	NA	NA	17.4431	NA	NA	NA	NA	17.8837	NA	NA	NA	18.7776	NA	20.5758	18.1403	NA	NA	NA	NA	NA	NA	15.9577	NA	NA	NA	NA	NA	NA	NA	31.6744	25.9376	17.34	NA	23.8153
01BR025-T	Tumor	BRCA	20.7893	18.1212	-0.0580019	NA	17.7741	16.9322	NA	18.7307	NA	NA	NA	NA	NA	NA	NA	18.4562	NA	NA	NA	NA	18.5748	NA	NA	NA	19.3211	NA	20.211	NA	NA	NA	NA	17.7227	NA	NA	16.4962	NA	NA	NA	NA	NA	NA	16.9929	31.4578	25.9088	NA	NA	23.2244
01BR026-T	Tumor	BRCA	19.9241	18.224	0.09572	18.5838	NA	16.2743	NA	NA	NA	NA	NA	NA	14.9922	NA	NA	18.523	NA	NA	NA	NA	18.8608	NA	NA	NA	NA	NA	20.6568	19.6768	NA	NA	NA	NA	NA	NA	NA	NA	NA	NA	NA	NA	NA	NA	32.8542	25.9936	NA	NA	22.7566
01BR027-T	Tumor	BRCA	NA	20.0973	NA	NA	NA	NA	NA	NA	20.0724	NA	NA	NA	NA	NA	NA	20.1222	NA	NA	NA	NA	NA	NA	NA	NA	NA	NA	NA	NA	NA	NA	NA	NA	NA	NA	NA	NA	NA	NA	NA	NA	NA	NA	32.4228	27.4389	NA	NA	22.5304
01BR030-T	Tumor	BRCA	20.2175	18.2396	0.0941108	18.3625	16.5291	16.557	NA	20.5613	18.5339	NA	NA	NA	NA	NA	NA	20.2108	NA	NA	NA	NA	18.6495	NA	NA	15.9819	18.714	NA	20.3852	19.7159	NA	NA	NA	NA	NA	NA	NA	NA	16.251	NA	NA	NA	NA	16.6628	31.9686	25.5853	NA	NA	23.0591
01BR031-T	Tumor	BRCA	20.6188	18.5586	0.38943	19.6621	NA	NA	NA	NA	NA	NA	NA	NA	NA	NA	NA	21.4073	NA	17.2087	NA	NA	NA	NA	NA	NA	NA	NA	21.2219	19.4693	NA	NA	NA	NA	15.2846	NA	NA	NA	16.8747	NA	NA	NA	NA	17.34	31.8704	26.2047	NA	NA	22.1856
01BR032-T	Tumor	BRCA	21.0166	20.1089	1.91628	NA	NA	NA	NA	NA	NA	NA	NA	NA	NA	NA	NA	NA	NA	NA	NA	NA	19.7048	NA	NA	NA	19.0114	NA	21.6104	NA	NA	NA	NA	NA	NA	NA	NA	NA	NA	NA	NA	NA	NA	NA	31.0097	26.4725	16.496	NA	23.9791
01BR033-T	Tumor	BRCA	20.0339	18.1727	0.0379979	18.308	NA	NA	NA	19.0145	NA	NA	NA	NA	NA	NA	NA	18.6032	NA	16.9043	NA	NA	NA	NA	NA	NA	18.7242	NA	20.6587	18.5951	NA	NA	NA	NA	NA	NA	NA	NA	NA	NA	NA	NA	14.5736	NA	32.6038	25.2624	NA	NA	23.0053
01BR040-T	Tumor	BRCA	18.3282	18.9483	0.914061	NA	18.2664	NA	NA	19.1383	NA	NA	NA	NA	NA	NA	NA	16.7608	NA	NA	NA	NA	NA	NA	NA	NA	NA	NA	20.4339	20.1421	NA	NA	NA	NA	NA	NA	NA	NA	NA	NA	NA	NA	NA	NA	31.5367	26.7243	NA	18.9336	21.7064
01BR042-T	Tumor	BRCA	20.6025	19.3025	1.13426	NA	17.6864	NA	NA	21.0838	NA	NA	NA	NA	NA	NA	NA	20.0712	NA	17.9801	NA	NA	20.2915	NA	NA	NA	19.4187	NA	NA	NA	NA	NA	NA	18.5855	NA	NA	NA	NA	NA	NA	NA	NA	NA	NA	32.1738	26.8036	NA	18.9355	22.5031
01BR043-T	Tumor	BRCA	19.3983	18.5831	0.485879	NA	17.4421	17.2247	NA	18.8689	NA	NA	NA	NA	NA	NA	NA	19.604	NA	NA	NA	NA	20.2171	NA	NA	NA	19.5549	NA	20.6652	NA	NA	NA	NA	18.3544	NA	NA	17.1854	NA	NA	NA	NA	NA	NA	16.7147	32.3958	26.5635	NA	NA	23.367
01CO001-N	Normal	COAD	NA	19.267	NA	NA	NA	NA	NA	19.8428	NA	NA	NA	NA	NA	NA	NA	NA	NA	NA	NA	NA	19.5413	NA	NA	NA	NA	NA	18.4388	19.245	NA	NA	NA	NA	NA	NA	NA	NA	NA	NA	NA	NA	NA	NA	31.4464	24.2159	NA	NA	NA
01CO005-N	Normal	COAD	NA	18.5501	NA	NA	NA	NA	NA	19.7774	NA	15.9324	NA	NA	NA	NA	NA	NA	NA	NA	NA	NA	19.2828	NA	NA	NA	NA	NA	NA	19.2077	NA	NA	NA	NA	NA	NA	NA	NA	NA	NA	NA	NA	NA	NA	31.6286	24.2316	NA	NA	NA
01CO005-T	Tumor	COAD	NA	19.2612	NA	NA	NA	NA	NA	NA	NA	NA	NA	NA	NA	NA	NA	NA	NA	NA	NA	NA	19.0999	NA	NA	NA	NA	NA	NA	19.4226	NA	NA	NA	NA	NA	NA	NA	NA	NA	NA	NA	NA	NA	NA	30.9669	24.8069	NA	NA	NA
01CO006-N	Normal	COAD	NA	18.1347	NA	NA	NA	NA	NA	20.1697	NA	16.1205	NA	NA	NA	NA	NA	NA	NA	NA	NA	NA	19.5428	NA	NA	NA	NA	NA	18.0959	NA	NA	NA	NA	NA	NA	NA	NA	NA	16.7444	NA	NA	NA	NA	NA	31.5875	24.2842	NA	NA	NA
01CO006-T	Tumor	COAD	NA	19.0435	NA	NA	NA	NA	NA	20.7107	NA	16.4993	NA	NA	NA	NA	NA	NA	NA	NA	NA	NA	19.9166	NA	NA	NA	NA	NA	NA	19.0474	NA	NA	NA	NA	NA	NA	NA	NA	NA	NA	NA	NA	NA	NA	31.0202	24.7998	NA	NA	NA
01CO008-N	Normal	COAD	NA	19.2845	NA	NA	NA	NA	NA	NA	NA	NA	NA	NA	NA	NA	NA	NA	NA	NA	NA	NA	19.1363	NA	NA	NA	NA	NA	NA	19.4327	NA	NA	NA	NA	NA	NA	NA	NA	NA	NA	NA	NA	NA	NA	31.0978	24.3833	NA	NA	NA
01CO008-T	Tumor	COAD	16.8841	18.6036	0.654469	NA	NA	NA	NA	20.3401	NA	NA	NA	NA	NA	NA	NA	NA	NA	NA	NA	NA	19.2698	NA	NA	NA	NA	NA	17.7458	19.4148	NA	NA	NA	NA	NA	NA	NA	NA	16.2477	NA	NA	NA	NA	NA	30.5064	24.532	NA	NA	NA
01CO013-N	Normal	COAD	NA	19.5132	NA	NA	NA	NA	NA	NA	NA	NA	NA	NA	NA	NA	NA	NA	NA	NA	NA	NA	19.5132	NA	NA	NA	NA	NA	NA	NA	NA	NA	NA	NA	NA	NA	NA	NA	NA	NA	NA	NA	NA	NA	31.4659	24.7239	NA	NA	NA
01CO013-T	Tumor	COAD	NA	19.5426	NA	NA	NA	NA	NA	NA	NA	NA	NA	NA	NA	NA	NA	NA	NA	NA	NA	NA	20.8452	NA	NA	NA	NA	NA	18.1869	19.5958	NA	NA	NA	NA	NA	NA	NA	NA	NA	NA	NA	NA	NA	NA	30.7301	25.1974	NA	NA	NA
01CO014-N	Normal	COAD	NA	19.5744	NA	NA	NA	NA	NA	20.1608	NA	NA	NA	NA	NA	NA	NA	NA	NA	NA	NA	NA	18.9879	NA	NA	NA	NA	NA	NA	NA	NA	NA	NA	NA	NA	NA	NA	NA	NA	NA	NA	NA	NA	NA	31.7405	24.3902	NA	NA	NA
01CO014-T	Tumor	COAD	NA	18.7885	NA	NA	NA	NA	NA	21.1745	NA	NA	NA	NA	NA	NA	NA	NA	NA	NA	NA	NA	19.4206	NA	NA	NA	14.0755	NA	19.2564	20.0154	NA	NA	NA	NA	NA	NA	NA	NA	NA	NA	NA	NA	NA	NA	30.5492	24.8312	NA	15.4008	NA
01CO015-N	Normal	COAD	NA	NA	NA	NA	NA	NA	NA	NA	NA	NA	NA	NA	NA	NA	NA	NA	NA	NA	NA	NA	NA	NA	NA	NA	NA	NA	NA	NA	NA	NA	NA	NA	NA	NA	NA	NA	NA	NA	NA	NA	NA	NA	31.9329	24.2639	NA	NA	NA
01CO015-T	Tumor	COAD	16.7704	18.6769	0.734437	NA	NA	NA	NA	21.027	NA	NA	NA	NA	NA	NA	NA	15.9674	NA	NA	NA	NA	21.4811	NA	NA	NA	NA	NA	18.9287	18.0457	NA	NA	NA	NA	NA	NA	NA	NA	16.6116	NA	NA	NA	NA	NA	31.1098	25.2835	NA	NA	NA
01CO019-N	Normal	COAD	NA	18.1636	NA	NA	NA	NA	NA	19.8112	NA	16.3463	NA	NA	NA	NA	NA	NA	NA	NA	NA	NA	19.0638	NA	NA	NA	NA	NA	NA	17.4332	NA	NA	NA	NA	NA	NA	NA	NA	NA	NA	NA	NA	NA	NA	31.2249	24.3712	NA	NA	NA
01CO019-T	Tumor	COAD	16.395	19.1796	1.25926	NA	NA	NA	NA	20.9257	NA	NA	NA	NA	NA	NA	NA	NA	NA	NA	NA	NA	19.4197	NA	NA	NA	NA	NA	18.4063	20.0238	NA	NA	NA	NA	NA	NA	NA	NA	17.1226	NA	NA	NA	NA	NA	30.9583	24.7026	NA	NA	NA
01CO022-N	Normal	COAD	NA	19.4005	NA	NA	NA	NA	NA	19.9063	NA	NA	NA	NA	NA	NA	NA	NA	NA	NA	NA	NA	19.3589	NA	NA	NA	NA	NA	NA	18.9364	NA	NA	NA	NA	NA	NA	NA	NA	NA	NA	NA	NA	NA	NA	31.8834	24.5703	NA	NA	NA
01CO022-T	Tumor	COAD	NA	19.6236	NA	NA	NA	NA	NA	21.2827	NA	17.1575	NA	NA	NA	NA	NA	NA	NA	NA	NA	NA	21.3539	NA	NA	NA	NA	NA	NA	18.7004	NA	NA	NA	NA	NA	NA	NA	NA	NA	NA	NA	NA	NA	NA	30.6067	25.5941	NA	NA	NA
01OV007-N	Normal	OV	NA	19.1881	NA	NA	17.0046	NA	NA	22.1584	NA	NA	NA	NA	NA	NA	NA	NA	NA	NA	NA	NA	NA	NA	NA	NA	19.078	NA	20.0828	19.9179	NA	NA	NA	NA	NA	NA	NA	NA	16.6222	NA	NA	NA	NA	19.4529	32.5959	25.4497	NA	22.1191	NA
01OV007-T	Tumor	OV	15.961	19.0192	1.12441	NA	NA	NA	NA	NA	NA	NA	NA	NA	NA	NA	NA	16.9065	NA	NA	NA	NA	NA	NA	NA	NA	NA	NA	19.9522	20.1165	NA	NA	NA	19.9347	NA	NA	NA	NA	16.4398	NA	NA	NA	NA	20.7656	31.985	25.3377	NA	21.024	NA
01OV008-N	Normal	OV	NA	18.7294	NA	NA	16.9235	NA	NA	20.7937	NA	NA	NA	NA	NA	NA	NA	NA	NA	12.8183	NA	NA	NA	NA	NA	16.5393	19.3848	NA	22.048	20.2217	NA	NA	NA	21.0816	NA	NA	NA	NA	17.551	NA	NA	NA	NA	19.9321	32.074	25.4505	NA	21.3198	19.1519
01OV010-N	Normal	OV	NA	19.2278	NA	NA	NA	16.6883	NA	20.8898	NA	NA	NA	NA	NA	NA	NA	NA	NA	NA	NA	NA	15.502	NA	NA	NA	NA	NA	21.1226	20.6009	NA	NA	NA	NA	NA	NA	NA	NA	NA	NA	NA	NA	NA	20.563	31.213	25.4471	NA	22.1662	NA
01OV013-N	Normal	OV	NA	19.0536	NA	NA	NA	16.9103	NA	20.2596	NA	NA	NA	NA	16.1549	NA	NA	NA	NA	NA	NA	NA	NA	NA	NA	NA	19.6793	NA	20.8156	NA	NA	NA	NA	NA	NA	NA	NA	NA	NA	NA	NA	NA	NA	20.502	32.39	25.3368	NA	21.782	NA
01OV017-N	Normal	OV	NA	18.8898	NA	NA	17.5794	17.4098	NA	19.7976	NA	NA	NA	NA	NA	NA	NA	NA	NA	NA	NA	NA	NA	NA	NA	NA	19.9322	NA	20.6702	19.969	NA	NA	NA	18.1758	NA	NA	NA	NA	17.4869	NA	NA	NA	NA	18.9873	32.1554	24.9261	NA	20.3562	18.5433
01OV017-T	Tumor	OV	16.9091	20.2877	2.33705	NA	NA	NA	NA	NA	NA	NA	NA	NA	NA	NA	NA	17.9557	NA	NA	NA	NA	NA	NA	NA	NA	NA	NA	21.74	21.6206	NA	NA	NA	20.85	NA	NA	NA	NA	17.3126	NA	NA	NA	NA	22.2474	31.2277	27.1179	NA	20.1683	NA
01OV018-T	Tumor	OV	NA	20.0512	NA	NA	NA	NA	NA	NA	NA	NA	NA	NA	NA	NA	NA	NA	NA	NA	NA	NA	18.0867	NA	NA	NA	19.8677	NA	21.0807	NA	NA	NA	NA	19.9846	NA	NA	NA	NA	NA	NA	NA	NA	NA	21.2365	31.9264	25.9306	NA	20.7804	NA
01OV019-N	Normal	OV	NA	18.3042	NA	NA	16.6921	NA	NA	20.5466	NA	NA	NA	NA	NA	NA	NA	NA	NA	14.0834	NA	NA	NA	NA	NA	16.1903	18.6496	NA	20.1229	19.9975	NA	NA	NA	19.9143	NA	NA	NA	NA	17.167	NA	NA	NA	NA	19.6787	32.0872	25.1915	NA	21.1865	17.7414
01OV023-N	Normal	OV	NA	19.2914	NA	NA	17.4766	NA	NA	21.2256	NA	NA	NA	NA	NA	NA	NA	NA	NA	NA	NA	NA	NA	NA	NA	NA	NA	NA	20.4749	19.8821	NA	NA	NA	19.1029	NA	NA	NA	NA	17.3006	NA	NA	NA	NA	19.5772	32.1469	25.2331	NA	NA	18.7994
01OV023-T	Tumor	OV	NA	20.0577	NA	NA	17.0908	NA	NA	20.9375	NA	NA	NA	NA	NA	NA	NA	NA	NA	NA	NA	NA	NA	NA	NA	NA	19.7739	NA	20.7183	20.9506	NA	NA	NA	NA	NA	NA	NA	NA	NA	NA	NA	NA	NA	20.8749	31.675	25.8454	NA	20.946	NA
01OV026-T	Tumor	OV	NA	18.7467	NA	NA	17.1087	NA	NA	21.2797	NA	NA	NA	NA	NA	NA	NA	NA	NA	13.5662	NA	NA	NA	NA	NA	17.0668	19.6822	NA	20.9379	20.8329	NA	NA	NA	19.2433	NA	NA	NA	NA	16.7828	NA	NA	NA	NA	20.9662	31.9057	25.8237	NA	22.0522	18.4971
01OV029-N	Normal	OV	NA	19.882	NA	NA	NA	NA	NA	20.7023	NA	NA	NA	NA	NA	NA	NA	NA	NA	NA	NA	NA	NA	NA	NA	NA	NA	NA	21.2826	20.8596	NA	NA	NA	NA	NA	NA	NA	NA	16.6835	NA	NA	NA	NA	NA	32.4183	24.8071	NA	21.0482	NA
01OV029-T	Tumor	OV	NA	19.1304	NA	NA	16.9854	15.8019	NA	21.3482	NA	NA	NA	NA	NA	NA	NA	17.1405	NA	NA	NA	NA	NA	NA	NA	NA	19.6101	NA	20.9694	20.8723	NA	NA	NA	20.427	NA	NA	NA	NA	17.1189	NA	NA	NA	NA	21.0301	31.6737	26.1129	NA	21.5445	17.6849
01OV030-T	Tumor	OV	15.4811	19.4228	1.55623	NA	NA	NA	NA	NA	NA	NA	NA	NA	NA	NA	NA	NA	NA	NA	NA	NA	NA	NA	NA	NA	19.3042	NA	19.6705	NA	NA	NA	NA	19.6961	NA	NA	NA	NA	17.8967	NA	NA	NA	NA	20.5463	32.1303	25.1463	NA	21.5022	NA
01OV039-N	Normal	OV	15.8336	18.7793	0.892047	NA	NA	NA	NA	NA	NA	NA	NA	NA	NA	NA	NA	16.4108	NA	NA	NA	NA	NA	NA	NA	NA	NA	NA	20.3323	19.8586	NA	NA	NA	18.6692	NA	NA	NA	NA	16.4954	NA	NA	NA	NA	20.9097	32.6724	25.3471	NA	21.4784	NA
01OV039-T	Tumor	OV	NA	20.3382	NA	NA	NA	16.5789	NA	22.5595	NA	NA	NA	NA	16.839	NA	NA	NA	NA	NA	NA	NA	NA	NA	NA	NA	21.5136	NA	22.0576	NA	NA	NA	NA	NA	NA	NA	NA	NA	NA	NA	NA	NA	NA	22.4805	30.763	25.6081	NA	22.6659	NA
01OV041-T	Tumor	OV	NA	18.8362	NA	NA	18.0516	NA	NA	21.2451	NA	NA	NA	NA	NA	NA	NA	NA	NA	14.3052	NA	NA	NA	NA	NA	16.8025	19.0999	NA	20.5257	20.5499	NA	NA	NA	19.9146	NA	NA	NA	NA	17.8052	NA	NA	NA	NA	20.0621	31.7721	25.4418	NA	20.4332	17.6795
01OV047-T	Tumor	OV	NA	19.7404	NA	NA	NA	NA	NA	21.1961	NA	NA	NA	NA	NA	NA	NA	NA	NA	NA	NA	NA	NA	NA	NA	NA	19.4069	NA	21.2711	20.4405	NA	NA	NA	NA	NA	NA	NA	NA	16.4646	NA	NA	NA	NA	19.6633	31.5503	25.4583	NA	21.5054	NA
02OV001-T	Tumor	OV	NA	18.7862	NA	NA	16.457	16.7943	NA	21.1237	NA	NA	NA	NA	NA	NA	NA	16.6272	NA	NA	NA	NA	NA	NA	NA	NA	18.9146	NA	20.6745	20.4114	NA	NA	NA	19.6563	NA	NA	NA	NA	16.9028	NA	NA	NA	NA	20.3002	31.9743	25.2428	NA	21.6088	17.7405
02OV005-T	Tumor	OV	NA	18.9262	NA	NA	NA	16.1301	NA	21.6825	NA	NA	NA	NA	15.1878	NA	NA	NA	NA	NA	NA	NA	NA	NA	NA	NA	19.3079	NA	20.4567	NA	NA	NA	NA	NA	NA	NA	NA	NA	NA	NA	NA	NA	NA	20.7919	31.6766	26.508	NA	21.0808	NA
02OV006-T	Tumor	OV	NA	19.2581	NA	NA	NA	NA	NA	21.755	NA	NA	NA	NA	NA	NA	NA	NA	NA	NA	NA	NA	18.0376	NA	NA	NA	NA	NA	20.4992	19.7576	NA	NA	NA	NA	NA	NA	NA	NA	16.2411	NA	NA	NA	NA	NA	31.2683	25.8934	NA	23.0114	NA
02OV008-T	Tumor	OV	NA	19.5996	NA	NA	17.3024	NA	NA	20.8919	NA	NA	NA	NA	NA	NA	NA	NA	NA	NA	NA	NA	NA	NA	NA	NA	NA	NA	21.1508	20.969	NA	NA	NA	19.8247	NA	NA	NA	NA	16.1877	NA	NA	NA	NA	20.8707	31.3968	25.667	NA	NA	17.8121
02OV015-T	Tumor	OV	NA	19.3457	NA	NA	NA	16.3111	NA	22.3618	NA	NA	NA	NA	14.9138	NA	NA	NA	NA	NA	NA	NA	NA	NA	NA	NA	19.4839	NA	21.756	NA	NA	NA	NA	NA	NA	NA	NA	NA	NA	NA	NA	NA	NA	21.2476	31.4167	26.2195	NA	21.0672	NA
02OV022-T	Tumor	OV	NA	19.3978	NA	NA	16.4631	NA	NA	21.019	NA	NA	NA	NA	NA	NA	NA	NA	NA	NA	NA	NA	NA	NA	NA	NA	19.7431	NA	20.9936	20.4179	NA	NA	NA	NA	NA	NA	NA	NA	16.2375	NA	NA	NA	NA	20.9105	32.0889	25.0766	NA	21.4076	NA
02OV023-T	Tumor	OV	17.1027	19.6143	1.65224	NA	NA	NA	NA	NA	NA	NA	NA	NA	NA	NA	NA	NA	NA	NA	NA	NA	NA	NA	NA	NA	19.0242	NA	20.377	NA	NA	NA	NA	20.0201	NA	NA	NA	NA	17.8931	NA	NA	NA	NA	20.7571	31.8096	25.4406	NA	22.1386	NA
02OV029-T	Tumor	OV	16.0606	19.6135	1.71287	NA	18.0914	NA	NA	NA	NA	NA	NA	NA	NA	NA	NA	17.0596	NA	NA	NA	NA	NA	NA	NA	NA	19.8511	NA	20.9593	20.7223	NA	NA	NA	NA	NA	NA	NA	NA	NA	NA	NA	NA	NA	20.9974	31.0637	26.5076	NA	21.1647	NA
02OV032-T	Tumor	OV	NA	19.308	NA	NA	17.5352	NA	NA	20.4887	NA	NA	NA	NA	NA	NA	NA	NA	NA	NA	NA	NA	NA	NA	NA	NA	19.3958	NA	20.3542	20.5601	NA	NA	NA	NA	NA	NA	NA	NA	16.4302	NA	NA	NA	NA	20.3921	31.2518	25.2865	NA	22.1267	NA
02OV036-T	Tumor	OV	NA	19.5808	NA	NA	NA	NA	NA	21.6587	NA	NA	NA	NA	NA	NA	NA	NA	NA	NA	NA	NA	17.5235	NA	NA	NA	NA	NA	20.868	20.3812	NA	NA	NA	NA	NA	NA	NA	NA	17.4724	NA	NA	NA	NA	NA	31.7759	25.6389	NA	21.3517	NA
02OV041-T	Tumor	OV	NA	19.0874	NA	NA	16.8478	16.1526	NA	21.6721	NA	NA	NA	NA	NA	NA	NA	17.483	NA	NA	NA	NA	NA	NA	NA	NA	19.8958	NA	20.6761	20.185	NA	NA	NA	20.2068	NA	NA	NA	NA	17.104	NA	NA	NA	NA	20.6511	31.2411	25.7762	NA	21.0003	19.0901
02OV044-T	Tumor	OV	17.2992	19.2002	1.22655	NA	17.6694	NA	NA	NA	NA	NA	NA	NA	NA	NA	NA	16.4508	NA	NA	NA	NA	NA	NA	NA	NA	20.2162	NA	20.4853	20.3207	NA	NA	NA	NA	NA	NA	NA	NA	NA	NA	NA	NA	NA	20.0587	31.1103	26.3391	NA	21.0803	NA
02OV046-T	Tumor	OV	15.2422	19.3191	1.46667	NA	NA	NA	NA	NA	NA	NA	NA	NA	NA	NA	NA	NA	NA	NA	NA	NA	NA	NA	NA	NA	19.3718	NA	20.319	NA	NA	NA	NA	19.9516	NA	NA	NA	NA	16.5889	NA	NA	NA	NA	20.3643	31.0335	25.4994	NA	21.313	NA
03BR002-T	Tumor	BRCA	19.6822	18.3831	0.269076	18.0629	NA	NA	NA	19.905	NA	NA	NA	NA	NA	NA	NA	17.3676	NA	16.6559	NA	NA	18.0596	NA	NA	NA	NA	NA	20.2044	18.426	NA	NA	NA	NA	NA	NA	NA	NA	NA	NA	NA	NA	NA	NA	32.374	25.4414	17.2305	17.8801	22.6238
03BR004-T	Tumor	BRCA	NA	18.7957	NA	NA	NA	NA	NA	NA	18.8004	NA	NA	NA	NA	NA	NA	18.791	NA	NA	NA	NA	NA	NA	NA	NA	NA	NA	NA	NA	NA	NA	NA	NA	NA	NA	NA	NA	NA	NA	NA	NA	NA	NA	32.3924	25.0996	NA	NA	22.9484
03BR005-T	Tumor	BRCA	20.1058	17.7767	-0.362287	18.1529	17.6386	17.0773	NA	19.3464	17.7162	NA	NA	NA	NA	NA	NA	17.4713	NA	NA	NA	NA	17.6548	NA	NA	15.1502	19.4463	NA	20.4659	18.6705	NA	NA	NA	NA	NA	NA	NA	NA	15.6565	NA	NA	NA	NA	16.6496	33.722	25.249	NA	NA	22.8021
03BR006-T	Tumor	BRCA	19.9247	18.6674	0.539121	19.3438	NA	16.6456	NA	NA	NA	NA	NA	NA	15.3451	NA	NA	20.2287	NA	NA	NA	NA	19.4234	NA	NA	NA	NA	NA	21.1848	18.5003	NA	NA	NA	NA	NA	NA	NA	NA	NA	NA	NA	NA	NA	NA	31.9468	26.6367	NA	NA	21.6369
03BR010-T	Tumor	BRCA	19.7666	17.7344	-0.384563	18.4303	NA	NA	NA	18.7196	NA	NA	NA	NA	NA	NA	NA	18.0274	NA	15.9152	NA	NA	NA	NA	NA	NA	18.5476	NA	20.1552	17.4328	NA	NA	NA	NA	NA	NA	NA	NA	NA	NA	NA	NA	14.6471	NA	31.4511	25.0043	NA	NA	24.009
03BR011-T	Tumor	BRCA	20.6854	18.5738	0.400756	18.9444	17.0312	16.3671	NA	20.8371	NA	NA	NA	NA	NA	NA	NA	19.2064	NA	NA	NA	NA	18.2102	NA	NA	NA	18.9136	NA	20.5419	19.1249	NA	NA	NA	NA	NA	NA	16.5615	NA	NA	NA	NA	NA	NA	NA	32.0762	26.282	16.8737	NA	23.2229
03BR013-T	Tumor	BRCA	NA	19.3556	NA	NA	NA	NA	NA	NA	18.4564	NA	NA	NA	NA	NA	NA	20.2547	NA	NA	NA	NA	NA	NA	NA	NA	NA	NA	NA	NA	NA	NA	NA	NA	NA	NA	NA	NA	NA	NA	NA	NA	NA	NA	32.8711	25.4296	NA	NA	23.7516
04OV001-T	Tumor	OV	16.282	19.8362	1.92248	NA	16.8362	NA	NA	NA	NA	NA	NA	NA	NA	NA	NA	18.1725	NA	NA	NA	NA	NA	NA	NA	NA	19.317	NA	21.1328	21.6079	NA	NA	NA	NA	NA	NA	NA	NA	NA	NA	NA	NA	NA	21.9506	31.7699	25.43	NA	21.1915	NA
04OV004-T	Tumor	OV	15.5581	19.1205	1.24941	NA	16.7385	NA	NA	NA	NA	NA	NA	NA	NA	NA	NA	17.1137	NA	NA	NA	NA	NA	NA	NA	NA	19.2999	NA	20.3903	20.2215	NA	NA	NA	NA	NA	NA	NA	NA	NA	NA	NA	NA	NA	20.959	31.6866	26.8423	NA	21.951	NA
04OV005-T	Tumor	OV	NA	18.9723	NA	NA	16.6554	16.1563	NA	21.1322	NA	NA	NA	NA	NA	NA	NA	17.0578	NA	NA	NA	NA	NA	NA	NA	NA	19.5025	NA	20.4594	20.3831	NA	NA	NA	20.4227	NA	NA	NA	NA	16.8034	NA	NA	NA	NA	21.1501	32.0204	25.355	NA	21.7424	18.1872
04OV008-T	Tumor	OV	17.3158	19.6654	1.6908	NA	17.4436	NA	NA	NA	NA	NA	NA	NA	NA	NA	NA	17.2974	NA	NA	NA	NA	NA	NA	NA	NA	19.8376	NA	21.1697	21.0701	NA	NA	NA	NA	NA	NA	NA	NA	NA	NA	NA	NA	NA	21.1741	31.4918	25.5277	NA	21.5221	NA
04OV011-T	Tumor	OV	NA	18.5318	NA	NA	16.9743	NA	NA	21.3276	NA	NA	NA	NA	NA	NA	NA	NA	NA	14.4148	NA	NA	NA	NA	NA	16.2381	19.1106	NA	19.9968	20.1839	NA	NA	NA	19.7368	NA	NA	NA	NA	17.0531	NA	NA	NA	NA	20.2817	31.4483	24.9389	NA	20.876	17.6384
04OV012-T	Tumor	OV	NA	19.7841	NA	NA	NA	16.1977	NA	21.4187	NA	NA	NA	NA	NA	NA	NA	NA	NA	NA	NA	NA	17.3476	NA	NA	NA	NA	NA	21.3706	21.4524	NA	NA	NA	NA	NA	NA	NA	NA	NA	NA	NA	NA	NA	20.9177	32.0751	26.1204	NA	20.838	NA
04OV013-T	Tumor	OV	NA	20.0503	NA	NA	17.069	NA	NA	20.6752	NA	NA	NA	NA	NA	NA	NA	NA	NA	NA	NA	NA	NA	NA	NA	NA	19.5835	NA	20.7518	21.0421	NA	NA	NA	NA	NA	NA	NA	NA	NA	NA	NA	NA	NA	21.1799	31.8216	25.5006	NA	20.4231	NA
04OV017-T	Tumor	OV	NA	19.7727	NA	NA	NA	NA	NA	NA	NA	NA	NA	NA	NA	NA	NA	NA	NA	NA	NA	NA	17.6475	NA	NA	NA	19.4268	NA	20.8092	NA	NA	NA	NA	20.1441	NA	NA	NA	NA	NA	NA	NA	NA	NA	20.8361	30.7775	25.9182	NA	21.9931	NA
04OV018-T	Tumor	OV	NA	19.3587	NA	NA	16.897	NA	NA	21.1355	NA	NA	NA	NA	NA	NA	NA	NA	NA	NA	NA	NA	NA	NA	NA	NA	19.6552	NA	20.4811	19.9498	NA	NA	NA	NA	NA	NA	NA	NA	16.7712	NA	NA	NA	NA	20.6212	31.7769	26.0226	NA	20.7564	NA
04OV021-T	Tumor	OV	NA	19.6718	NA	NA	NA	NA	NA	NA	NA	NA	NA	NA	NA	NA	NA	NA	NA	NA	NA	NA	16.5027	NA	NA	NA	19.468	NA	21.5385	NA	NA	NA	NA	20.1639	NA	NA	NA	NA	NA	NA	NA	NA	NA	20.6861	31.9722	25.474	NA	20.6551	NA
04OV023-T	Tumor	OV	NA	18.9855	NA	NA	NA	NA	NA	NA	NA	NA	NA	NA	NA	NA	NA	NA	NA	NA	NA	NA	16.6638	NA	NA	NA	18.7761	NA	20.2697	NA	NA	NA	NA	19.4661	NA	NA	NA	NA	NA	NA	NA	NA	NA	19.7519	31.7166	25.309	NA	21.3621	NA
04OV024-T	Tumor	OV	NA	19.1385	NA	NA	17.473	NA	NA	21.645	NA	NA	NA	NA	NA	NA	NA	NA	NA	13.866	NA	NA	NA	NA	NA	17.5109	19.8409	NA	20.8786	21.1186	NA	NA	NA	20.2924	NA	NA	NA	NA	17.2344	NA	NA	NA	NA	21.525	30.8399	25.9875	NA	21.2471	17.2646
04OV027-T	Tumor	OV	NA	19.3421	NA	NA	15.9808	NA	NA	21.1589	NA	NA	NA	NA	NA	NA	NA	NA	NA	NA	NA	NA	NA	NA	NA	NA	18.9311	NA	20.4231	20.0889	NA	NA	NA	NA	NA	NA	NA	NA	17.8363	NA	NA	NA	NA	20.9758	31.3514	26.2724	NA	20.7063	NA
04OV028-T	Tumor	OV	NA	19.8983	NA	NA	16.6507	NA	NA	21.9853	NA	NA	NA	NA	NA	NA	NA	NA	NA	NA	NA	NA	NA	NA	NA	NA	20.0534	NA	21.1618	20.7944	NA	NA	NA	NA	NA	NA	NA	NA	17.3446	NA	NA	NA	NA	21.2981	32.0765	25.8608	NA	20.8934	NA
04OV031-T	Tumor	OV	NA	19.5889	NA	NA	NA	NA	NA	NA	NA	NA	NA	NA	NA	NA	NA	NA	NA	NA	NA	NA	17.239	NA	NA	NA	20.2151	NA	20.1378	NA	NA	NA	NA	19.7563	NA	NA	NA	NA	NA	NA	NA	NA	NA	20.5965	31.8182	25.9898	NA	20.8252	NA
04OV033-T	Tumor	OV	14.9313	19.2411	1.40695	NA	NA	NA	NA	NA	NA	NA	NA	NA	NA	NA	NA	16.7293	NA	NA	NA	NA	NA	NA	NA	NA	NA	NA	21.5425	19.7527	NA	NA	NA	19.9967	NA	NA	NA	NA	17.5448	NA	NA	NA	NA	19.8806	31.8076	25.2148	NA	21.1879	NA
04OV036-T	Tumor	OV	NA	20.0077	NA	NA	NA	16.8644	NA	22.2091	NA	NA	NA	NA	NA	NA	NA	NA	NA	NA	NA	NA	17.3411	NA	NA	NA	NA	NA	21.4096	20.8641	NA	NA	NA	NA	NA	NA	NA	NA	NA	NA	NA	NA	NA	21.3581	31.6255	25.7885	NA	20.8961	NA
04OV037-T	Tumor	OV	16.9126	20.9995	3.0486	NA	NA	NA	NA	NA	NA	NA	NA	NA	NA	NA	NA	NA	NA	NA	NA	NA	NA	NA	NA	NA	21.6433	NA	21.9852	NA	NA	NA	NA	21.01	NA	NA	NA	NA	17.8589	NA	NA	NA	NA	22.4998	31.3657	26.1085	NA	20.4081	NA
04OV039-T	Tumor	OV	15.7647	19.7068	1.82353	NA	NA	NA	NA	NA	NA	NA	NA	NA	NA	NA	NA	NA	NA	NA	NA	NA	NA	NA	NA	NA	19.6253	NA	20.8463	NA	NA	NA	NA	20.4765	NA	NA	NA	NA	16.7384	NA	NA	NA	NA	20.8473	31.751	26.2681	NA	21.1505	NA
04OV040-T	Tumor	OV	16.0931	19.682	1.77945	NA	NA	NA	NA	NA	NA	NA	NA	NA	NA	NA	NA	NA	NA	NA	NA	NA	NA	NA	NA	NA	19.7527	NA	20.7092	NA	NA	NA	NA	19.7269	NA	NA	NA	NA	17.6843	NA	NA	NA	NA	20.5371	31.4309	25.6482	NA	21.2466	NA
04OV044-T	Tumor	OV	NA	19.1612	NA	NA	NA	15.3099	NA	21.406	NA	NA	NA	NA	NA	NA	NA	NA	NA	NA	NA	NA	17.1683	NA	NA	NA	NA	NA	20.2639	20.3627	NA	NA	NA	NA	NA	NA	NA	NA	NA	NA	NA	NA	NA	20.4564	31.3322	25.7545	NA	22.2855	NA
04OV045-T	Tumor	OV	NA	18.9172	NA	NA	16.0748	NA	NA	22.4235	NA	NA	NA	NA	NA	NA	NA	NA	NA	13.6403	NA	NA	NA	NA	NA	16.8857	20.7197	NA	21.0765	20.2425	NA	NA	NA	19.807	NA	NA	NA	NA	17.0862	NA	NA	NA	NA	21.2162	31.6937	26.5301	NA	21.3381	17.7537
04OV048-T	Tumor	OV	NA	19.9342	NA	NA	NA	NA	NA	NA	NA	NA	NA	NA	NA	NA	NA	NA	NA	NA	NA	NA	17.8679	NA	NA	NA	20.1617	NA	20.9634	NA	NA	NA	NA	20.0051	NA	NA	NA	NA	NA	NA	NA	NA	NA	20.6727	31.6057	25.1751	NA	21.2205	NA
04OV049-T	Tumor	OV	16.0946	18.8075	0.904879	NA	16.3768	NA	NA	NA	NA	NA	NA	NA	NA	NA	NA	16.0852	NA	NA	NA	NA	NA	NA	NA	NA	19.8748	NA	20.7137	19.8606	NA	NA	NA	NA	NA	NA	NA	NA	NA	NA	NA	NA	NA	19.9343	32.3502	25.1428	NA	20.5034	NA
04OV050-T	Tumor	OV	NA	19.2781	NA	NA	NA	NA	NA	NA	NA	NA	NA	NA	NA	NA	NA	NA	NA	NA	NA	NA	16.4426	NA	NA	NA	19.3276	NA	20.7647	NA	NA	NA	NA	20.1663	NA	NA	NA	NA	NA	NA	NA	NA	NA	19.6895	31.5097	26.1078	NA	21.3124	NA
04OV051-T	Tumor	OV	15.8376	19.4537	1.5662	NA	NA	NA	NA	NA	NA	NA	NA	NA	NA	NA	NA	NA	NA	NA	NA	NA	NA	NA	NA	NA	19.6314	NA	20.5296	NA	NA	NA	NA	19.8018	NA	NA	NA	NA	17.0002	NA	NA	NA	NA	20.3056	31.6026	26.7566	NA	20.5922	NA
04OV053-T	Tumor	OV	16.8276	19.6317	1.68588	NA	NA	NA	NA	NA	NA	NA	NA	NA	NA	NA	NA	16.5737	NA	NA	NA	NA	NA	NA	NA	NA	NA	NA	21.5204	20.8192	NA	NA	NA	20.7557	NA	NA	NA	NA	18.0211	NA	NA	NA	NA	20.1003	31.3452	26.0508	NA	21.2605	NA
04OV054-T	Tumor	OV	NA	20.8317	NA	NA	NA	NA	NA	NA	NA	NA	NA	NA	NA	NA	NA	NA	NA	NA	NA	NA	17.6163	NA	NA	NA	21.0534	NA	21.8127	NA	NA	NA	NA	21.8477	NA	NA	NA	NA	NA	NA	NA	NA	NA	21.8284	31.096	26.2557	NA	21.6421	NA
04OV055-T	Tumor	OV	NA	19.1486	NA	NA	NA	16.4822	NA	21.5798	NA	NA	NA	NA	14.5271	NA	NA	NA	NA	NA	NA	NA	NA	NA	NA	NA	20.2028	NA	21.1494	NA	NA	NA	NA	NA	NA	NA	NA	NA	NA	NA	NA	NA	NA	20.9501	31.7486	26.2294	NA	20.6644	NA
04OV057-T	Tumor	OV	NA	20.3285	NA	NA	17.0696	NA	NA	22.5122	NA	NA	NA	NA	NA	NA	NA	NA	NA	NA	NA	NA	NA	NA	NA	NA	21.2937	NA	21.6917	20.6439	NA	NA	NA	NA	NA	NA	NA	NA	17.5878	NA	NA	NA	NA	21.5003	31.2892	26.1297	NA	20.7364	NA
04OV058-T	Tumor	OV	NA	19.4681	NA	NA	16.0273	NA	NA	22.017	NA	NA	NA	NA	NA	NA	NA	NA	NA	NA	NA	NA	NA	NA	NA	NA	19.5953	NA	21.1675	20.2912	NA	NA	NA	NA	NA	NA	NA	NA	16.9259	NA	NA	NA	NA	20.2523	31.6049	26.22	NA	21.4718	NA
04OV063-T	Tumor	OV	NA	19.5717	NA	NA	17.4947	NA	NA	21.595	NA	NA	NA	NA	NA	NA	NA	NA	NA	NA	NA	NA	NA	NA	NA	NA	20.003	NA	20.2024	20.2096	NA	NA	NA	NA	NA	NA	NA	NA	16.9861	NA	NA	NA	NA	20.511	31.6441	25.4667	NA	21.5435	NA
05BR001-T	Tumor	BRCA	20.0768	17.9527	-0.184484	18.8234	NA	NA	NA	NA	NA	NA	NA	NA	NA	NA	NA	19.4584	NA	16.9733	NA	NA	NA	NA	NA	NA	NA	NA	20.0311	19.2597	NA	NA	NA	NA	15.5856	NA	NA	NA	16.2433	NA	NA	NA	NA	17.2471	32.5663	25.9713	NA	NA	22.1423
05BR003-T	Tumor	BRCA	20.6818	17.97	-0.202829	NA	16.8005	17.3122	NA	18.7136	NA	NA	NA	NA	NA	NA	NA	19.2723	NA	NA	NA	NA	18.512	NA	NA	NA	18.5334	NA	20.4584	NA	NA	NA	NA	17.1115	NA	NA	16.294	NA	NA	NA	NA	NA	NA	16.6924	32.4584	25.7783	NA	NA	23.3377
05BR004-T	Tumor	BRCA	19.0759	17.3482	-0.73004	17.67	NA	16.3312	NA	NA	NA	NA	NA	NA	14.7294	NA	NA	17.0612	NA	NA	NA	NA	17.3505	NA	NA	NA	NA	NA	19.6317	18.6636	NA	NA	NA	NA	NA	NA	NA	NA	NA	NA	NA	NA	NA	NA	32.2402	25.5302	NA	NA	22.2463
05BR005-T	Tumor	BRCA	20.1957	18.7177	0.573455	18.2132	NA	NA	NA	20.1524	NA	NA	NA	NA	NA	NA	NA	18.8772	NA	16.9221	NA	NA	18.1877	NA	NA	NA	NA	NA	19.958	18.7132	NA	NA	NA	NA	NA	NA	NA	NA	NA	NA	NA	NA	NA	NA	33.1544	25.7379	17.6083	17.9013	22.614
05BR009-T	Tumor	BRCA	20.3288	17.5879	-0.564151	NA	17.1681	16.5853	NA	17.305	NA	NA	NA	NA	NA	NA	NA	17.1641	NA	NA	NA	NA	17.6171	NA	NA	NA	18.5044	NA	21.1718	NA	NA	NA	NA	17.1288	NA	NA	NA	NA	NA	NA	NA	NA	NA	15.6466	33.4451	25.1067	NA	NA	22.5626
05BR016-T	Tumor	BRCA	20.4233	18.0807	-0.0769896	18.6366	17.3365	16.3122	NA	20.2496	19.0001	NA	NA	NA	NA	NA	NA	19.1818	NA	NA	NA	NA	17.9655	NA	NA	15.6122	18.7626	NA	19.9843	18.7999	NA	NA	NA	NA	NA	NA	NA	NA	16.3432	NA	NA	NA	NA	16.864	31.3941	25.5876	NA	NA	22.4487
05BR026-T	Tumor	BRCA	20.3518	17.9596	-0.193842	18.6055	17.1491	NA	NA	17.9056	NA	NA	NA	NA	NA	NA	NA	19.1391	NA	NA	NA	NA	NA	NA	NA	NA	18.907	NA	20.5975	NA	NA	NA	NA	NA	NA	14.4998	NA	NA	NA	NA	NA	NA	NA	16.8731	32.7566	25.967	16.9517	NA	25.4456
05BR029-T	Tumor	BRCA	22.0375	18.8331	0.580354	NA	17.7562	16.6967	NA	20.1137	NA	NA	NA	NA	NA	NA	NA	19.4194	NA	NA	NA	NA	19.5605	NA	NA	NA	19.7726	NA	20.9229	NA	NA	NA	NA	19.1195	NA	NA	17.3408	NA	NA	NA	NA	NA	NA	17.6284	31.6709	27.9416	NA	NA	21.4027
05BR038-T	Tumor	BRCA	20.0603	19.1709	1.03468	NA	17.2527	NA	NA	20.6622	NA	NA	NA	NA	NA	NA	NA	18.7602	NA	NA	NA	NA	NA	NA	NA	NA	NA	NA	20.2412	18.9384	NA	NA	NA	NA	NA	NA	NA	NA	NA	NA	NA	NA	NA	NA	32.4816	25.5445	NA	17.7637	22.1865
05BR042-T	Tumor	BRCA	21.559	18.6974	0.472823	17.5015	17.5927	17.618	NA	21.2587	19.8778	NA	NA	NA	NA	NA	NA	17.9609	NA	NA	NA	NA	18.9787	NA	NA	17.5268	19.7202	NA	21.5899	19.9484	NA	NA	NA	NA	NA	NA	NA	NA	16.7199	NA	NA	NA	NA	16.7722	31.6837	26.8731	NA	NA	21.7487
05BR043-T	Tumor	BRCA	21.5443	18.8824	0.658728	19.4894	17.1751	NA	NA	20.5364	NA	NA	NA	NA	NA	NA	NA	20.1987	NA	NA	NA	NA	NA	NA	NA	NA	19.3252	NA	20.9414	NA	NA	NA	NA	NA	NA	16.055	NA	NA	NA	NA	NA	NA	NA	17.3378	32.5512	26.4104	17.2803	NA	21.6728
05BR044-T	Tumor	BRCA	19.9843	18.3668	0.234977	18.1769	17.1979	NA	NA	NA	NA	NA	NA	NA	NA	NA	NA	NA	NA	NA	NA	NA	NA	NA	NA	NA	19.1152	NA	20.103	18.7033	NA	NA	NA	NA	NA	NA	NA	NA	NA	NA	NA	NA	NA	16.9042	32.2502	25.555	NA	NA	22.1975
05BR045-T	Tumor	BRCA	20.2354	19.5069	1.36032	NA	NA	NA	NA	NA	NA	NA	NA	NA	NA	NA	NA	NA	NA	NA	NA	NA	19.0139	NA	NA	NA	19.2654	NA	20.2413	NA	NA	NA	NA	NA	NA	NA	NA	NA	NA	NA	NA	NA	NA	NA	32.3247	26.6677	16.8198	NA	22.9976
05CO002-N	Normal	COAD	NA	18.4612	NA	NA	NA	NA	NA	20.1615	NA	15.9909	NA	NA	NA	NA	NA	NA	NA	NA	NA	NA	18.5799	NA	NA	NA	NA	NA	NA	19.1124	NA	NA	NA	NA	NA	NA	NA	NA	NA	NA	NA	NA	NA	NA	31.3971	24.1261	NA	NA	NA
05CO002-T	Tumor	COAD	16.4174	19.1949	1.27317	NA	NA	NA	NA	21.2357	NA	NA	NA	NA	NA	NA	NA	NA	NA	NA	NA	NA	20.2085	NA	NA	NA	NA	NA	17.9173	19.766	NA	NA	NA	NA	NA	NA	NA	NA	16.8468	NA	NA	NA	NA	NA	31.0586	24.9229	NA	NA	NA
05CO003-N	Normal	COAD	NA	18.0541	NA	NA	NA	NA	NA	20.1551	NA	NA	NA	NA	NA	NA	NA	NA	NA	NA	NA	NA	19.4117	NA	NA	NA	13.4312	NA	17.8894	19.3832	NA	NA	NA	NA	NA	NA	NA	NA	NA	NA	NA	NA	NA	NA	31.6402	24.3219	NA	15.6369	NA
05CO003-T	Tumor	COAD	16.9895	18.2988	0.343448	NA	NA	NA	NA	21.2254	NA	NA	NA	NA	NA	NA	NA	14.5386	NA	NA	NA	NA	19.7143	NA	NA	NA	NA	NA	18.3954	18.4158	NA	NA	NA	NA	NA	NA	NA	NA	17.5035	NA	NA	NA	NA	NA	31.4047	24.8931	NA	NA	NA
05CO006-N	Normal	COAD	17.1835	18.6228	0.655991	NA	NA	NA	NA	19.7431	NA	NA	NA	NA	NA	NA	NA	NA	NA	NA	NA	NA	18.8896	NA	NA	NA	NA	NA	18.2358	19.6839	NA	NA	NA	NA	NA	NA	NA	NA	16.5617	NA	NA	NA	NA	NA	31.5309	24.0789	NA	NA	NA
05CO006-T	Tumor	COAD	17.9328	18.2616	0.25063	NA	NA	NA	NA	21.1439	NA	NA	NA	NA	NA	NA	NA	14.3762	NA	NA	NA	NA	19.5846	NA	NA	NA	NA	NA	18.9753	18.3544	NA	NA	NA	NA	NA	NA	NA	NA	17.1351	NA	NA	NA	NA	NA	30.7799	25.3108	NA	NA	NA
05CO007-N	Normal	COAD	NA	18.0833	NA	NA	NA	NA	NA	20.1382	NA	16.668	NA	NA	NA	NA	NA	NA	NA	NA	NA	NA	19.4208	NA	NA	NA	NA	NA	17.9925	NA	NA	NA	NA	NA	NA	NA	NA	NA	16.197	NA	NA	NA	NA	NA	31.5808	23.9467	NA	NA	NA
05CO011-N	Normal	COAD	NA	20.0028	NA	NA	NA	NA	NA	20.5161	NA	NA	NA	NA	NA	NA	NA	NA	NA	NA	NA	NA	19.4895	NA	NA	NA	NA	NA	NA	NA	NA	NA	NA	NA	NA	NA	NA	NA	NA	NA	NA	NA	NA	NA	31.3008	24.3498	NA	NA	NA
05CO011-T	Tumor	COAD	NA	20.4558	NA	NA	NA	NA	NA	21.1361	NA	NA	NA	NA	NA	NA	NA	NA	NA	NA	NA	NA	19.8052	NA	NA	NA	NA	NA	NA	20.4261	NA	NA	NA	NA	NA	NA	NA	NA	NA	NA	NA	NA	NA	NA	30.8658	24.8857	NA	NA	NA
05CO015-N	Normal	COAD	NA	19.1252	NA	NA	NA	NA	NA	19.495	NA	NA	NA	NA	NA	NA	NA	NA	NA	NA	NA	NA	18.7554	NA	NA	NA	NA	NA	NA	NA	NA	NA	NA	NA	NA	NA	NA	NA	NA	NA	NA	NA	NA	NA	31.5441	24.3939	NA	NA	NA
05CO015-T	Tumor	COAD	NA	18.8696	NA	NA	NA	NA	NA	20.6044	NA	16.5947	NA	NA	NA	NA	NA	NA	NA	NA	NA	NA	19.8918	NA	NA	NA	NA	NA	NA	18.3875	NA	NA	NA	NA	NA	NA	NA	NA	NA	NA	NA	NA	NA	NA	31.0641	25.0182	NA	NA	NA
05CO020-N	Normal	COAD	NA	18.0596	NA	NA	NA	NA	NA	19.7016	NA	16.1634	NA	NA	NA	NA	NA	NA	NA	NA	NA	NA	18.9524	NA	NA	NA	NA	NA	NA	17.4209	NA	NA	NA	NA	NA	NA	NA	NA	NA	NA	NA	NA	NA	NA	31.6246	24.2663	NA	NA	NA
05CO020-T	Tumor	COAD	NA	19.042	NA	NA	NA	NA	NA	21.0939	NA	NA	NA	NA	NA	NA	NA	NA	NA	NA	NA	NA	20.6197	NA	NA	NA	14.2139	NA	19.547	19.7354	NA	NA	NA	NA	NA	NA	NA	NA	NA	NA	NA	NA	NA	NA	31.2529	24.9611	NA	15.7142	NA
05CO026-N	Normal	COAD	NA	19.7652	NA	NA	NA	NA	NA	20.1454	NA	NA	NA	NA	NA	NA	NA	NA	NA	NA	NA	NA	19.385	NA	NA	NA	NA	NA	NA	NA	NA	NA	NA	NA	NA	NA	NA	NA	NA	NA	NA	NA	NA	NA	31.4161	24.3314	NA	NA	NA
05CO026-T	Tumor	COAD	NA	20.6078	NA	NA	NA	NA	NA	21.6995	NA	NA	NA	NA	NA	NA	NA	NA	NA	NA	NA	NA	19.5161	NA	NA	NA	NA	NA	NA	NA	NA	NA	NA	NA	NA	NA	NA	NA	NA	NA	NA	NA	NA	NA	30.6231	25.2864	NA	NA	NA
05CO028-N	Normal	COAD	17.4063	18.4307	0.450738	NA	NA	NA	NA	19.6564	NA	NA	NA	NA	NA	NA	NA	NA	NA	NA	NA	NA	18.1598	NA	NA	NA	NA	NA	18.2179	19.5534	NA	NA	NA	NA	NA	NA	NA	NA	16.5659	NA	NA	NA	NA	NA	31.6313	23.8212	NA	NA	NA
05CO028-T	Tumor	COAD	NA	19.437	NA	NA	NA	NA	NA	NA	NA	NA	NA	NA	NA	NA	NA	NA	NA	NA	NA	NA	19.6633	NA	NA	NA	NA	NA	NA	19.2107	NA	NA	NA	NA	NA	NA	NA	NA	NA	NA	NA	NA	NA	NA	30.5459	25.0549	NA	NA	NA
05CO029-N	Normal	COAD	NA	17.92	NA	NA	NA	NA	NA	19.9229	NA	NA	NA	NA	NA	NA	NA	NA	NA	NA	NA	NA	18.1815	NA	NA	NA	13.5985	NA	18.0707	19.8262	NA	NA	NA	NA	NA	NA	NA	NA	NA	NA	NA	NA	NA	NA	31.3625	24.3539	NA	15.0592	NA
05CO029-T	Tumor	COAD	NA	18.4077	NA	NA	NA	NA	NA	20.288	NA	16.4263	NA	NA	NA	NA	NA	NA	NA	NA	NA	NA	20.394	NA	NA	NA	NA	NA	18.4186	NA	NA	NA	NA	NA	NA	NA	NA	NA	16.5116	NA	NA	NA	NA	NA	30.9824	24.9433	NA	NA	NA
05CO032-N	Normal	COAD	NA	18.5042	NA	NA	NA	NA	NA	NA	NA	NA	NA	NA	NA	NA	NA	NA	NA	NA	NA	NA	18.9362	NA	NA	NA	NA	NA	17.4541	19.1222	NA	NA	NA	NA	NA	NA	NA	NA	NA	NA	NA	NA	NA	NA	31.6288	24.3013	NA	NA	NA
05CO032-T	Tumor	COAD	NA	18.6138	NA	NA	NA	NA	NA	20.6294	NA	NA	NA	NA	NA	NA	NA	NA	NA	NA	NA	NA	19.8525	NA	NA	NA	14.0295	NA	19.0926	19.4649	NA	NA	NA	NA	NA	NA	NA	NA	NA	NA	NA	NA	NA	NA	31.431	25.4605	NA	15.6361	NA
05CO033-N	Normal	COAD	NA	18.7634	NA	NA	NA	NA	NA	20.1604	NA	NA	NA	NA	NA	NA	NA	NA	NA	NA	NA	NA	19.0243	NA	NA	NA	NA	NA	17.1055	NA	NA	NA	NA	NA	NA	NA	NA	NA	NA	NA	NA	NA	NA	NA	31.3647	24.3601	NA	NA	NA
05CO033-T	Tumor	COAD	NA	19.3872	NA	NA	NA	NA	NA	20.3985	NA	NA	NA	NA	NA	NA	NA	NA	NA	NA	NA	NA	19.7131	NA	NA	NA	NA	NA	NA	18.05	NA	NA	NA	NA	NA	NA	NA	NA	NA	NA	NA	NA	NA	NA	31.5196	24.8015	NA	NA	NA
05CO034-N	Normal	COAD	NA	19.8701	NA	NA	NA	NA	NA	19.8767	NA	NA	NA	NA	NA	NA	NA	NA	NA	NA	NA	NA	19.8634	NA	NA	NA	NA	NA	NA	NA	NA	NA	NA	NA	NA	NA	NA	NA	NA	NA	NA	NA	NA	NA	31.4692	24.4772	NA	NA	NA
05CO034-T	Tumor	COAD	16.9338	19.313	1.3609	NA	NA	NA	NA	20.8041	NA	NA	NA	NA	NA	NA	NA	NA	NA	NA	NA	NA	20.4794	NA	NA	NA	NA	NA	18.7486	19.8162	NA	NA	NA	NA	NA	NA	NA	NA	16.7167	NA	NA	NA	NA	NA	31.2305	24.5069	NA	NA	NA
05CO035-N	Normal	COAD	NA	18.876	NA	NA	NA	NA	NA	20.022	NA	NA	NA	NA	NA	NA	NA	NA	NA	NA	NA	NA	19.1765	NA	NA	NA	NA	NA	16.9972	19.3083	NA	NA	NA	NA	NA	NA	NA	NA	NA	NA	NA	NA	NA	NA	31.4521	24.3876	NA	NA	NA
05CO035-T	Tumor	COAD	NA	19.7182	NA	NA	NA	NA	NA	20.9293	NA	NA	NA	NA	NA	NA	NA	NA	NA	NA	NA	NA	20.6648	NA	NA	NA	NA	NA	17.4383	19.8405	NA	NA	NA	NA	NA	NA	NA	NA	NA	NA	NA	NA	NA	NA	30.7915	24.5714	NA	NA	NA
05CO037-N	Normal	COAD	NA	18.4166	NA	NA	NA	NA	NA	19.6114	NA	NA	NA	NA	NA	NA	NA	NA	NA	NA	NA	NA	18.3727	NA	NA	NA	NA	NA	NA	17.2655	NA	NA	NA	NA	NA	NA	NA	NA	NA	NA	NA	NA	NA	NA	31.4513	24.192	NA	NA	NA
05CO037-T	Tumor	COAD	NA	18.2545	NA	NA	NA	NA	NA	20.4616	NA	NA	NA	NA	NA	NA	NA	NA	NA	NA	NA	NA	NA	NA	NA	NA	14.2801	NA	18.619	19.6575	NA	NA	NA	NA	NA	NA	NA	NA	NA	NA	NA	NA	NA	NA	31.5625	25.228	NA	15.5419	NA
05CO039-N	Normal	COAD	NA	19.1414	NA	NA	NA	NA	NA	NA	NA	NA	NA	NA	NA	NA	NA	NA	NA	NA	NA	NA	19.2268	NA	NA	NA	NA	NA	NA	19.056	NA	NA	NA	NA	NA	NA	NA	NA	NA	NA	NA	NA	NA	NA	31.7489	24.4218	NA	NA	NA
05CO039-T	Tumor	COAD	17.0029	19.1902	1.23401	NA	NA	NA	NA	20.8133	NA	NA	NA	NA	NA	NA	NA	NA	NA	NA	NA	NA	19.3846	NA	NA	NA	NA	NA	19.3199	19.7214	NA	NA	NA	NA	NA	NA	NA	NA	16.7118	NA	NA	NA	NA	NA	30.873	25.3115	NA	NA	NA
05CO041-N	Normal	COAD	NA	18.7515	NA	NA	NA	NA	NA	19.8205	NA	NA	NA	NA	NA	NA	NA	NA	NA	NA	NA	NA	19.3146	NA	NA	NA	NA	NA	17.1195	NA	NA	NA	NA	NA	NA	NA	NA	NA	NA	NA	NA	NA	NA	NA	31.7447	24.3222	NA	NA	NA
05CO041-T	Tumor	COAD	17.3123	19.5802	1.60576	NA	NA	NA	NA	21.2626	NA	NA	NA	NA	NA	NA	NA	NA	NA	NA	NA	NA	19.8297	NA	NA	NA	NA	NA	19.5933	20.5023	NA	NA	NA	NA	NA	NA	NA	NA	16.7129	NA	NA	NA	NA	NA	31.1864	25.4593	NA	NA	NA
05CO044-N	Normal	COAD	16.6342	18.4957	0.561231	NA	NA	NA	NA	19.8407	NA	NA	NA	NA	NA	NA	NA	NA	NA	NA	NA	NA	18.5208	NA	NA	NA	NA	NA	17.9097	18.9035	NA	NA	NA	NA	NA	NA	NA	NA	17.3038	NA	NA	NA	NA	NA	31.655	24.2116	NA	NA	NA
05CO044-T	Tumor	COAD	NA	20.2008	NA	NA	NA	NA	NA	21.2465	NA	NA	NA	NA	NA	NA	NA	NA	NA	NA	NA	NA	21.0794	NA	NA	NA	NA	NA	18.1436	20.3337	NA	NA	NA	NA	NA	NA	NA	NA	NA	NA	NA	NA	NA	NA	30.6624	24.9647	NA	NA	NA
05CO045-N	Normal	COAD	NA	18.741	NA	NA	NA	NA	NA	20.1007	NA	NA	NA	NA	NA	NA	NA	NA	NA	NA	NA	NA	19.0131	NA	NA	NA	NA	NA	16.9266	18.9235	NA	NA	NA	NA	NA	NA	NA	NA	NA	NA	NA	NA	NA	NA	31.5815	24.3215	NA	NA	NA
05CO045-T	Tumor	COAD	NA	19.5187	NA	NA	NA	NA	NA	20.9452	NA	NA	NA	NA	NA	NA	NA	NA	NA	NA	NA	NA	19.8853	NA	NA	NA	NA	NA	17.7242	19.52	NA	NA	NA	NA	NA	NA	NA	NA	NA	NA	NA	NA	NA	NA	31.0687	24.5358	NA	NA	NA
05CO047-N	Normal	COAD	NA	18.9901	NA	NA	NA	NA	NA	19.8367	NA	NA	NA	NA	NA	NA	NA	NA	NA	NA	NA	NA	17.9251	NA	NA	NA	NA	NA	NA	19.2086	NA	NA	NA	NA	NA	NA	NA	NA	NA	NA	NA	NA	NA	NA	31.5716	23.8009	NA	NA	NA
05CO047-T	Tumor	COAD	NA	18.8694	NA	NA	NA	NA	NA	20.9135	NA	16.2018	NA	NA	NA	NA	NA	NA	NA	NA	NA	NA	19.9701	NA	NA	NA	NA	NA	NA	18.3921	NA	NA	NA	NA	NA	NA	NA	NA	NA	NA	NA	NA	NA	NA	30.7959	24.6635	NA	NA	NA
05CO048-N	Normal	COAD	16.7134	18.442	0.502892	NA	NA	NA	NA	19.8999	NA	NA	NA	NA	NA	NA	NA	NA	NA	NA	NA	NA	19.023	NA	NA	NA	NA	NA	17.913	19.1168	NA	NA	NA	NA	NA	NA	NA	NA	16.2574	NA	NA	NA	NA	NA	31.6806	24.317	NA	NA	NA
05CO048-T	Tumor	COAD	NA	19.7936	NA	NA	NA	NA	NA	20.7188	NA	NA	NA	NA	NA	NA	NA	NA	NA	NA	NA	NA	18.8683	NA	NA	NA	NA	NA	NA	NA	NA	NA	NA	NA	NA	NA	NA	NA	NA	NA	NA	NA	NA	NA	30.8607	24.886	NA	NA	NA
05CO049-N	Normal	COAD	NA	19.923	NA	NA	NA	NA	NA	20.2092	NA	NA	NA	NA	NA	NA	NA	NA	NA	NA	NA	NA	19.6368	NA	NA	NA	NA	NA	NA	NA	NA	NA	NA	NA	NA	NA	NA	NA	NA	NA	NA	NA	NA	NA	31.2015	24.7193	NA	NA	NA
05CO049-T	Tumor	COAD	NA	18.5112	NA	NA	NA	NA	NA	20.4514	NA	NA	NA	NA	NA	NA	NA	NA	NA	NA	NA	NA	20.2959	NA	NA	NA	13.733	NA	18.7949	19.2808	NA	NA	NA	NA	NA	NA	NA	NA	NA	NA	NA	NA	NA	NA	30.9428	24.6591	NA	15.5254	NA
05CO050-N	Normal	COAD	NA	17.9971	NA	NA	NA	NA	NA	20.357	NA	16.4177	NA	NA	NA	NA	NA	NA	NA	NA	NA	NA	18.5567	NA	NA	NA	NA	NA	18.0102	NA	NA	NA	NA	NA	NA	NA	NA	NA	16.6439	NA	NA	NA	NA	NA	31.9504	24.2988	NA	NA	NA
05CO050-T	Tumor	COAD	NA	19.5311	NA	NA	NA	NA	NA	NA	NA	NA	NA	NA	NA	NA	NA	NA	NA	NA	NA	NA	19.0178	NA	NA	NA	NA	NA	18.9256	20.6498	NA	NA	NA	NA	NA	NA	NA	NA	NA	NA	NA	NA	NA	NA	30.5574	25.6498	NA	NA	NA
05CO053-N	Normal	COAD	NA	19.3187	NA	NA	NA	NA	NA	NA	NA	NA	NA	NA	NA	NA	NA	NA	NA	NA	NA	NA	19.3187	NA	NA	NA	NA	NA	NA	NA	NA	NA	NA	NA	NA	NA	NA	NA	NA	NA	NA	NA	NA	NA	31.729	24.2649	NA	NA	NA
05CO053-T	Tumor	COAD	NA	19.6983	NA	NA	NA	NA	NA	21.0685	NA	NA	NA	NA	NA	NA	NA	NA	NA	NA	NA	NA	19.937	NA	NA	NA	NA	NA	17.8252	19.9624	NA	NA	NA	NA	NA	NA	NA	NA	NA	NA	NA	NA	NA	NA	30.7418	25.144	NA	NA	NA
05CO054-N	Normal	COAD	NA	19.5347	NA	NA	NA	NA	NA	19.8646	NA	NA	NA	NA	NA	NA	NA	NA	NA	NA	NA	NA	19.2048	NA	NA	NA	NA	NA	NA	NA	NA	NA	NA	NA	NA	NA	NA	NA	NA	NA	NA	NA	NA	NA	31.5591	24.3333	NA	NA	NA
05CO054-T	Tumor	COAD	NA	18.5604	NA	NA	NA	NA	NA	20.6729	NA	16.4256	NA	NA	NA	NA	NA	NA	NA	NA	NA	NA	19.8182	NA	NA	NA	NA	NA	18.9953	NA	NA	NA	NA	NA	NA	NA	NA	NA	16.8901	NA	NA	NA	NA	NA	30.4894	24.946	NA	NA	NA
06BR003-T	Tumor	BRCA	20.0939	18.9662	0.827969	17.8723	NA	NA	NA	20.6906	NA	NA	NA	NA	NA	NA	NA	NA	NA	NA	NA	NA	17.4172	NA	NA	NA	NA	NA	20.3947	18.4563	NA	NA	NA	NA	NA	NA	NA	NA	NA	NA	NA	NA	NA	NA	32.1238	26.5714	NA	17.7885	22.7546
06BR005-T	Tumor	BRCA	19.5927	18.3152	0.206475	17.837	17.4613	NA	NA	NA	NA	NA	NA	NA	NA	NA	NA	NA	NA	NA	NA	NA	NA	NA	NA	NA	18.7004	NA	20.0092	18.9609	NA	NA	NA	NA	NA	NA	NA	NA	NA	NA	NA	NA	NA	16.9223	31.9961	25.7328	NA	NA	22.9905
06BR006-T	Tumor	BRCA	18.9811	19.3115	1.2388	NA	NA	NA	NA	NA	NA	NA	NA	NA	NA	NA	NA	NA	NA	NA	NA	NA	17.6517	NA	NA	NA	19.6868	NA	20.596	NA	NA	NA	NA	NA	NA	NA	NA	NA	NA	NA	NA	NA	NA	NA	33.3544	25.0781	17.0101	NA	22.2426
06BR014-T	Tumor	BRCA	19.624	18.199	0.0884707	18.146	NA	NA	NA	19.9983	NA	NA	NA	NA	NA	NA	NA	17.9173	NA	16.3683	NA	NA	16.8415	NA	NA	NA	NA	NA	20.0732	18.0485	NA	NA	NA	NA	NA	NA	NA	NA	NA	NA	NA	NA	NA	NA	31.8481	25.617	17.0085	18.5355	22.0414
06CO001-N	Normal	COAD	NA	19.4675	NA	NA	NA	NA	NA	19.6934	NA	NA	NA	NA	NA	NA	NA	NA	NA	NA	NA	NA	19.6803	NA	NA	NA	NA	NA	NA	19.0288	NA	NA	NA	NA	NA	NA	NA	NA	NA	NA	NA	NA	NA	NA	31.8038	24.4586	NA	NA	NA
06CO001-T	Tumor	COAD	NA	19.6559	NA	NA	NA	NA	NA	NA	NA	NA	NA	NA	NA	NA	NA	NA	NA	NA	NA	NA	20.9835	NA	NA	NA	NA	NA	18.0953	19.8889	NA	NA	NA	NA	NA	NA	NA	NA	NA	NA	NA	NA	NA	NA	30.9337	24.7887	NA	NA	NA
06CO002-N	Normal	COAD	NA	18.4118	NA	NA	NA	NA	NA	20.2267	NA	15.8257	NA	NA	NA	NA	NA	NA	NA	NA	NA	NA	18.4327	NA	NA	NA	NA	NA	NA	19.1619	NA	NA	NA	NA	NA	NA	NA	NA	NA	NA	NA	NA	NA	NA	31.8852	24.0664	NA	NA	NA
06CO002-T	Tumor	COAD	NA	19.4856	NA	NA	NA	NA	NA	20.5419	NA	NA	NA	NA	NA	NA	NA	NA	NA	NA	NA	NA	20.3687	NA	NA	NA	NA	NA	NA	17.5462	NA	NA	NA	NA	NA	NA	NA	NA	NA	NA	NA	NA	NA	NA	31.3231	24.5475	NA	NA	NA
09BR001-T	Tumor	BRCA	20.297	18.3316	0.181414	18.3624	17.1287	16.2025	NA	20.3015	NA	NA	NA	NA	NA	NA	NA	18.6037	NA	NA	NA	NA	18.2033	NA	NA	NA	19.0077	NA	20.3152	18.7441	NA	NA	NA	NA	NA	NA	16.4469	NA	NA	NA	NA	NA	NA	NA	31.626	25.9304	16.7381	NA	23.5163
09BR004-T	Tumor	BRCA	21.2312	19.6187	1.41353	NA	16.9865	NA	NA	20.3356	NA	NA	NA	NA	NA	NA	NA	19.9223	NA	NA	NA	NA	NA	NA	NA	NA	NA	NA	21.4146	19.4347	NA	NA	NA	NA	NA	NA	NA	NA	NA	NA	NA	NA	NA	NA	31.8085	26.8762	NA	18.1036	22.2546
09BR005-T	Tumor	BRCA	19.9711	18.9288	0.797754	NA	NA	NA	NA	NA	NA	NA	NA	NA	NA	NA	NA	NA	NA	NA	NA	NA	17.4213	NA	NA	NA	18.8529	NA	20.5121	NA	NA	NA	NA	NA	NA	NA	NA	NA	NA	NA	NA	NA	NA	NA	32.0149	25.8328	16.3625	NA	22.3908
09BR007-T	Tumor	BRCA	19.8035	19.1878	1.06665	NA	NA	NA	NA	20.2786	NA	NA	NA	NA	NA	NA	NA	NA	NA	NA	NA	NA	NA	NA	NA	NA	NA	NA	20.5901	18.8106	NA	NA	NA	17.0718	NA	NA	NA	NA	NA	NA	NA	NA	NA	NA	32.0646	25.6105	NA	NA	22.7452
09CO005-N	Normal	COAD	16.7739	18.896	0.95333	NA	NA	NA	NA	20.4718	NA	NA	NA	NA	NA	NA	NA	NA	NA	NA	NA	NA	19.7094	NA	NA	NA	NA	NA	18.1588	19.37	NA	NA	NA	NA	NA	NA	NA	NA	16.7701	NA	NA	NA	NA	NA	31.0579	24.412	NA	NA	NA
09CO005-T	Tumor	COAD	16.4893	18.9858	1.05985	NA	NA	NA	NA	20.4671	NA	NA	NA	NA	NA	NA	NA	NA	NA	NA	NA	NA	19.9621	NA	NA	NA	NA	NA	17.936	19.5941	NA	NA	NA	NA	NA	NA	NA	NA	16.9695	NA	NA	NA	NA	NA	30.9671	24.6242	NA	NA	NA
09CO006-N	Normal	COAD	17.0191	18.2859	0.328752	NA	NA	NA	NA	NA	NA	NA	NA	NA	NA	NA	NA	NA	NA	NA	NA	NA	20.063	NA	NA	NA	NA	NA	18.1046	NA	NA	NA	NA	NA	NA	NA	NA	NA	16.6901	NA	NA	NA	NA	NA	31.5421	24.3936	NA	NA	NA
09CO006-T	Tumor	COAD	16.3573	17.9471	0.02897	NA	NA	NA	NA	20.5645	NA	NA	NA	NA	NA	NA	NA	14.2158	NA	NA	NA	NA	19.6689	NA	NA	NA	NA	NA	18.6824	17.7323	NA	NA	NA	NA	NA	NA	NA	NA	16.8187	NA	NA	NA	NA	NA	31.1688	25.0741	NA	NA	NA
09CO008-N	Normal	COAD	16.5612	18.5139	0.583754	NA	NA	NA	NA	19.2465	NA	NA	NA	NA	NA	NA	NA	NA	NA	NA	NA	NA	18.7995	NA	NA	NA	NA	NA	17.9684	19.3113	NA	NA	NA	NA	NA	NA	NA	NA	17.2439	NA	NA	NA	NA	NA	31.5913	24.0863	NA	NA	NA
09CO008-T	Tumor	COAD	NA	20.5805	NA	NA	NA	NA	NA	21.1144	NA	NA	NA	NA	NA	NA	NA	NA	NA	NA	NA	NA	20.0467	NA	NA	NA	NA	NA	NA	NA	NA	NA	NA	NA	NA	NA	NA	NA	NA	NA	NA	NA	NA	NA	31.3985	24.8083	NA	NA	NA
09CO011-N	Normal	COAD	NA	18.8657	NA	NA	NA	NA	NA	20.1073	NA	NA	NA	NA	NA	NA	NA	NA	NA	NA	NA	NA	18.8074	NA	NA	NA	NA	NA	NA	17.6824	NA	NA	NA	NA	NA	NA	NA	NA	NA	NA	NA	NA	NA	NA	31.4474	24.4666	NA	NA	NA
09CO011-T	Tumor	COAD	NA	19.5015	NA	NA	NA	NA	NA	20.3309	NA	NA	NA	NA	NA	NA	NA	NA	NA	NA	NA	NA	19.7489	NA	NA	NA	NA	NA	18.4831	19.443	NA	NA	NA	NA	NA	NA	NA	NA	NA	NA	NA	NA	NA	NA	30.6715	24.6798	NA	NA	NA
09CO013-N	Normal	COAD	16.7828	18.5263	0.583102	NA	NA	NA	NA	19.7221	NA	NA	NA	NA	NA	NA	NA	NA	NA	NA	NA	NA	19.3408	NA	NA	NA	NA	NA	18.2268	19.0442	NA	NA	NA	NA	NA	NA	NA	NA	16.2976	NA	NA	NA	NA	NA	31.2431	24.274	NA	NA	NA
09CO013-T	Tumor	COAD	NA	19.5457	NA	NA	NA	NA	NA	21.1734	NA	16.9398	NA	NA	NA	NA	NA	NA	NA	NA	NA	NA	19.9606	NA	NA	NA	NA	NA	NA	20.1088	NA	NA	NA	NA	NA	NA	NA	NA	NA	NA	NA	NA	NA	NA	30.52	25.4619	NA	NA	NA
09CO014-N	Normal	COAD	NA	19.01	NA	NA	NA	NA	NA	19.6638	NA	NA	NA	NA	NA	NA	NA	NA	NA	NA	NA	NA	18.4911	NA	NA	NA	NA	NA	NA	18.8752	NA	NA	NA	NA	NA	NA	NA	NA	NA	NA	NA	NA	NA	NA	31.4582	24.2972	NA	NA	NA
09CO014-T	Tumor	COAD	16.0919	18.2938	0.391247	NA	NA	NA	NA	NA	NA	NA	NA	NA	NA	NA	NA	NA	NA	NA	NA	NA	19.4258	NA	NA	NA	NA	NA	18.7448	NA	NA	NA	NA	NA	NA	NA	NA	NA	16.7106	NA	NA	NA	NA	NA	31.2208	24.8499	NA	NA	NA
09CO015-N	Normal	COAD	17.7001	17.9161	-0.0811044	NA	NA	NA	NA	NA	NA	NA	NA	NA	NA	NA	NA	NA	NA	NA	NA	NA	18.9347	NA	NA	NA	NA	NA	18.2126	NA	NA	NA	NA	NA	NA	NA	NA	NA	16.6012	NA	NA	NA	NA	NA	31.5293	24.3105	NA	NA	NA
09CO015-T	Tumor	COAD	NA	19.6012	NA	NA	NA	NA	NA	NA	NA	NA	NA	NA	NA	NA	NA	NA	NA	NA	NA	NA	19.4274	NA	NA	NA	NA	NA	NA	19.775	NA	NA	NA	NA	NA	NA	NA	NA	NA	NA	NA	NA	NA	NA	31.4613	24.8537	NA	NA	NA
09CO018-N	Normal	COAD	NA	19.89	NA	NA	NA	NA	NA	20.4008	NA	NA	NA	NA	NA	NA	NA	NA	NA	NA	NA	NA	19.9302	NA	NA	NA	NA	NA	NA	19.3389	NA	NA	NA	NA	NA	NA	NA	NA	NA	NA	NA	NA	NA	NA	31.2753	24.6131	NA	NA	NA
09CO018-T	Tumor	COAD	NA	20.5569	NA	NA	NA	NA	NA	21.2534	NA	NA	NA	NA	NA	NA	NA	NA	NA	NA	NA	NA	21.3571	NA	NA	NA	NA	NA	19.0847	20.5323	NA	NA	NA	NA	NA	NA	NA	NA	NA	NA	NA	NA	NA	NA	30.7326	25.6877	NA	NA	NA
09CO019-N	Normal	COAD	16.6458	18.5599	0.624787	NA	NA	NA	NA	20.4314	NA	NA	NA	NA	NA	NA	NA	NA	NA	NA	NA	NA	19.5701	NA	NA	NA	NA	NA	17.9208	18.6122	NA	NA	NA	NA	NA	NA	NA	NA	16.2651	NA	NA	NA	NA	NA	31.3496	24.6199	NA	NA	NA
09CO019-T	Tumor	COAD	NA	20.0352	NA	NA	NA	NA	NA	20.6361	NA	NA	NA	NA	NA	NA	NA	NA	NA	NA	NA	NA	19.4344	NA	NA	NA	NA	NA	NA	NA	NA	NA	NA	NA	NA	NA	NA	NA	NA	NA	NA	NA	NA	NA	31.1524	24.7192	NA	NA	NA
09CO022-N	Normal	COAD	NA	NA	NA	NA	NA	NA	NA	NA	NA	NA	NA	NA	NA	NA	NA	NA	NA	NA	NA	NA	NA	NA	NA	NA	NA	NA	NA	NA	NA	NA	NA	NA	NA	NA	NA	NA	NA	NA	NA	NA	NA	NA	31.4966	24.2241	NA	NA	NA
09CO022-T	Tumor	COAD	NA	19.9038	NA	NA	NA	NA	NA	NA	NA	NA	NA	NA	NA	NA	NA	NA	NA	NA	NA	NA	19.8251	NA	NA	NA	NA	NA	NA	19.9825	NA	NA	NA	NA	NA	NA	NA	NA	NA	NA	NA	NA	NA	NA	30.6127	24.7604	NA	NA	NA
11BR003-T	Tumor	BRCA	NA	19.4276	NA	NA	NA	NA	NA	NA	19.5447	NA	NA	NA	NA	NA	NA	19.3105	NA	NA	NA	NA	NA	NA	NA	NA	NA	NA	NA	NA	NA	NA	NA	NA	NA	NA	NA	NA	NA	NA	NA	NA	NA	NA	31.7492	26.8298	NA	NA	22.8082
11BR004-T	Tumor	BRCA	20.5724	17.759	-0.40741	NA	16.9984	16.3523	NA	17.4875	NA	NA	NA	NA	NA	NA	NA	18.7874	NA	NA	NA	NA	17.7568	NA	NA	NA	19.0179	NA	21.0943	NA	NA	NA	NA	17.165	NA	NA	15.9769	NA	NA	NA	NA	NA	NA	16.9536	32.047	25.8282	NA	NA	22.112
11BR006-T	Tumor	BRCA	19.3722	18.7046	0.608881	17.9315	18.0532	NA	NA	NA	NA	NA	NA	NA	NA	NA	NA	NA	NA	NA	NA	NA	NA	NA	NA	NA	19.522	NA	21.784	19.1664	NA	NA	NA	NA	NA	NA	NA	NA	NA	NA	NA	NA	NA	15.7705	32.1813	25.6456	NA	NA	23.2296
11BR009-T	Tumor	BRCA	20.953	20.7591	2.57029	NA	NA	NA	NA	22.3843	NA	NA	NA	NA	NA	NA	NA	NA	NA	NA	NA	NA	NA	NA	NA	NA	NA	NA	21.8767	20.5913	NA	NA	NA	18.1843	NA	NA	NA	NA	NA	NA	NA	NA	NA	NA	31.0234	26.19	NA	NA	20.6517
11BR010-T	Tumor	BRCA	19.9881	17.953	-0.17905	19.3782	NA	NA	NA	NA	NA	NA	NA	NA	NA	NA	NA	18.2641	NA	17.1579	NA	NA	NA	NA	NA	NA	NA	NA	20.4018	18.9475	NA	NA	NA	NA	15.2364	NA	NA	NA	16.986	NA	NA	NA	NA	17.2517	32.0754	25.1165	NA	NA	22.2361
11BR011-T	Tumor	BRCA	19.9645	17.626	-0.504615	18.37	16.6899	16.6911	NA	20.0977	NA	NA	NA	NA	NA	NA	NA	18.3183	NA	17.5812	NA	NA	17.3864	NA	NA	NA	18.6688	NA	20.2491	18.6572	NA	NA	NA	NA	14.615	NA	15.9949	NA	16.2668	NA	NA	NA	NA	17.1777	32.0562	25.2702	16.4763	NA	23.2677
11BR012-T	Tumor	BRCA	19.6429	18.0782	-0.0334244	NA	16.6512	NA	NA	20.0823	NA	NA	NA	NA	NA	NA	NA	19.0734	NA	17.4922	NA	NA	17.9636	NA	NA	NA	19.7313	NA	NA	NA	NA	NA	NA	15.5537	NA	NA	NA	NA	NA	NA	NA	NA	NA	NA	31.5842	25.1493	NA	18.275	22.4924
11BR013-T	Tumor	BRCA	20.8494	18.8168	0.634093	19.3983	NA	NA	NA	18.4971	NA	NA	NA	NA	NA	NA	NA	19.8171	NA	17.5717	NA	NA	NA	NA	NA	NA	19.424	NA	21.1153	19.6671	NA	NA	NA	NA	NA	NA	NA	NA	NA	NA	NA	NA	15.044	NA	31.4263	27.0255	NA	NA	23.2401
11BR014-T	Tumor	BRCA	18.794	16.8441	-1.21753	17.1898	NA	NA	NA	NA	NA	NA	NA	NA	NA	NA	NA	17.823	NA	16.4642	NA	NA	NA	NA	NA	NA	NA	NA	19.9773	17.8178	NA	NA	NA	NA	13.127	NA	NA	NA	16.2952	NA	NA	NA	NA	16.0589	32.8161	24.6657	NA	NA	22.2197
11BR015-T	Tumor	BRCA	21.0677	17.8565	-0.339111	NA	17.0508	15.9762	NA	16.8515	NA	NA	NA	NA	NA	NA	NA	19.4119	NA	NA	NA	NA	18.3771	NA	NA	NA	19.3007	NA	21.1251	NA	NA	NA	NA	17.1369	NA	NA	16.0754	NA	NA	NA	NA	NA	NA	17.2593	31.5773	26.2484	NA	NA	22.6279
11BR016-T	Tumor	BRCA	21.6802	19.6173	1.38566	20.5576	17.7353	NA	NA	NA	NA	NA	NA	NA	NA	NA	NA	NA	NA	NA	NA	NA	NA	NA	NA	NA	19.928	NA	20.9702	20.3157	NA	NA	NA	NA	NA	NA	NA	NA	NA	NA	NA	NA	NA	18.197	31.7204	26.8873	NA	NA	22.3684
11BR017-T	Tumor	BRCA	20.3414	20.2909	2.13812	NA	NA	NA	NA	NA	NA	NA	NA	NA	NA	NA	NA	NA	NA	NA	NA	NA	20.2374	NA	NA	NA	19.6688	NA	20.9665	NA	NA	NA	NA	NA	NA	NA	NA	NA	NA	NA	NA	NA	NA	NA	31.9211	25.9254	15.9926	NA	22.7903
11BR018-T	Tumor	BRCA	19.4381	18.1966	0.0969711	17.5071	16.7531	NA	NA	NA	NA	NA	NA	NA	NA	NA	NA	NA	NA	NA	NA	NA	NA	NA	NA	NA	19.293	NA	20.9226	18.072	NA	NA	NA	NA	NA	NA	NA	NA	NA	NA	NA	NA	NA	16.6316	32.6964	25.3349	NA	NA	22.4681
11BR019-T	Tumor	BRCA	20.046	18.034	-0.101455	18.667	NA	NA	NA	18.7753	NA	NA	NA	NA	NA	NA	NA	19.9053	NA	16.9666	NA	NA	NA	NA	NA	NA	19.032	NA	20.3192	19.0175	NA	NA	NA	NA	NA	NA	NA	NA	NA	14.9024	NA	NA	14.7203	NA	31.6626	25.3063	NA	NA	22.8791
11BR020-T	Tumor	BRCA	19.9395	18.9635	0.834392	NA	NA	NA	NA	20.3588	NA	NA	NA	NA	NA	NA	NA	NA	NA	NA	NA	NA	NA	NA	NA	NA	NA	NA	20.2566	18.4898	NA	NA	NA	16.749	NA	NA	NA	NA	NA	NA	NA	NA	NA	NA	32.046	25.3406	NA	NA	21.7586
11BR022-T	Tumor	BRCA	20.0819	18.2923	0.154785	18.3941	NA	NA	NA	18.8997	NA	NA	NA	NA	NA	NA	NA	19.0993	NA	16.9955	NA	NA	NA	NA	NA	NA	18.6755	NA	20.2968	18.8258	NA	NA	NA	NA	NA	NA	NA	NA	NA	NA	NA	NA	15.1518	NA	31.9065	25.2776	NA	NA	22.7167
11BR023-T	Tumor	BRCA	20.811	19.7443	1.56387	19.8868	NA	NA	NA	21.1723	NA	NA	NA	NA	NA	NA	NA	NA	NA	NA	NA	NA	18.5001	NA	NA	NA	NA	NA	20.7241	18.4385	NA	NA	NA	NA	NA	NA	NA	NA	NA	NA	NA	NA	NA	NA	31.792	26.2989	NA	19.5357	21.6676
11BR024-T	Tumor	BRCA	21.9439	19.6653	1.4181	20.1394	17.4683	17.5257	NA	21.9241	21.0146	NA	NA	NA	NA	NA	NA	21.9062	NA	NA	NA	NA	20.7884	NA	NA	17.3944	19.9078	NA	21.6566	20.3476	NA	NA	NA	NA	NA	NA	NA	NA	17.0784	NA	NA	NA	NA	18.4975	32.0189	27.0834	NA	NA	21.5157
11BR025-T	Tumor	BRCA	20.1718	19.0964	0.953545	NA	NA	NA	NA	NA	NA	NA	NA	NA	NA	NA	NA	NA	NA	NA	NA	NA	17.836	NA	NA	NA	18.5598	NA	20.8933	NA	NA	NA	NA	NA	NA	NA	NA	NA	NA	NA	NA	NA	NA	NA	31.8565	26.2605	17.0506	NA	22.4772
11BR027-T	Tumor	BRCA	19.5549	19.8442	1.73772	NA	17.5705	NA	NA	21.6044	NA	NA	NA	NA	NA	NA	NA	20.0244	NA	NA	NA	NA	NA	NA	NA	NA	NA	NA	21.0997	18.9221	NA	NA	NA	NA	NA	NA	NA	NA	NA	NA	NA	NA	NA	NA	31.6789	26.0424	NA	17.6369	22.1299
11BR028-T	Tumor	BRCA	20.6735	19.6768	1.50447	NA	NA	NA	NA	20.4062	NA	NA	NA	NA	NA	NA	NA	NA	NA	NA	NA	NA	NA	NA	NA	NA	NA	NA	20.9282	19.2923	NA	NA	NA	18.0806	NA	NA	NA	NA	NA	NA	NA	NA	NA	NA	32.0096	25.7109	NA	NA	22.4648
11BR030-T	Tumor	BRCA	19.8276	17.7748	-0.34773	18.8134	NA	NA	NA	NA	NA	NA	NA	NA	NA	NA	NA	18.8369	NA	17.48	NA	NA	NA	NA	NA	NA	NA	NA	20.6907	18.394	NA	NA	NA	NA	15.2194	NA	NA	NA	16.0497	NA	NA	NA	NA	16.7144	32.2781	26.2704	NA	NA	21.8878
11BR031-T	Tumor	BRCA	20.2895	17.8488	-0.300922	18.6204	NA	NA	NA	19.5643	NA	NA	NA	NA	NA	NA	NA	18.2555	NA	17.1228	NA	NA	17.4807	NA	NA	NA	18.8654	NA	20.1651	18.6176	NA	NA	NA	NA	NA	NA	NA	NA	NA	15.0256	NA	NA	14.7708	NA	32.2894	25.6513	15.7772	NA	22.7601
11BR032-T	Tumor	BRCA	NA	18.8916	NA	NA	NA	NA	NA	NA	18.5329	NA	NA	NA	NA	NA	NA	19.2503	NA	NA	NA	NA	NA	NA	NA	NA	NA	NA	NA	NA	NA	NA	NA	NA	NA	NA	NA	NA	NA	NA	NA	NA	NA	NA	32.476	25.7678	NA	NA	22.2883
11BR036-T	Tumor	BRCA	22.1152	18.9713	0.714028	20.5504	17.5546	17.395	NA	19.8625	NA	NA	NA	NA	NA	NA	NA	21.6123	NA	18.6639	NA	NA	20.0812	NA	NA	NA	20.0853	NA	21.7006	20.0904	NA	NA	NA	NA	NA	15.8226	16.4496	NA	NA	17.4657	NA	NA	NA	18.2644	31.2747	27.8861	18.761	18.5677	21.6627
11BR038-T	Tumor	BRCA	19.9455	17.5294	-0.600044	18.3147	16.592	NA	NA	17.5961	NA	NA	NA	NA	NA	NA	NA	18.3035	NA	NA	NA	NA	NA	NA	NA	NA	18.7682	NA	20.0842	NA	NA	NA	NA	NA	NA	13.5922	NA	NA	NA	NA	NA	NA	NA	16.9846	32.5209	25.8315	17.2752	NA	22.4265
11BR040-T	Tumor	BRCA	19.5885	17.4474	-0.661062	NA	17.3203	16.3931	NA	17.8719	NA	NA	NA	NA	NA	NA	NA	17.4157	NA	NA	NA	NA	17.9596	NA	NA	NA	18.705	NA	20.3649	NA	NA	NA	NA	16.6385	NA	NA	15.5892	NA	NA	NA	NA	NA	NA	16.2158	32.2744	25.3495	NA	NA	22.6544
11BR042-T	Tumor	BRCA	20.2942	18.6686	0.51861	18.8959	17.151	NA	NA	NA	NA	NA	NA	NA	NA	NA	NA	NA	NA	NA	NA	NA	NA	NA	NA	NA	19.2851	NA	20.7193	18.9596	NA	NA	NA	NA	NA	NA	NA	NA	NA	NA	NA	NA	NA	17.001	32.1597	25.9152	NA	NA	22.1111
11BR043-T	Tumor	BRCA	20.7324	20.2452	2.0694	19.8779	NA	NA	NA	21.0376	NA	NA	NA	NA	NA	NA	NA	NA	NA	NA	NA	NA	20.2715	NA	NA	NA	NA	NA	21.0706	18.9687	NA	NA	NA	NA	NA	NA	NA	NA	NA	NA	NA	NA	NA	NA	31.7368	26.1123	NA	17.5548	23.8466
11BR044-T	Tumor	BRCA	20.5266	18.7133	0.549585	19.2399	16.9508	NA	NA	NA	NA	NA	NA	NA	NA	NA	NA	NA	NA	NA	NA	NA	NA	NA	NA	NA	19.2893	NA	20.351	18.9581	NA	NA	NA	NA	NA	NA	NA	NA	NA	NA	NA	NA	NA	17.4907	31.7854	25.853	NA	NA	23.9062
11BR047-T	Tumor	BRCA	19.8326	18.7101	0.587254	18.0082	NA	NA	NA	19.8175	NA	NA	NA	NA	NA	NA	NA	NA	NA	NA	NA	NA	17.7643	NA	NA	NA	NA	NA	20.273	17.6875	NA	NA	NA	NA	NA	NA	NA	NA	NA	NA	NA	NA	NA	NA	32.4893	25.5091	NA	17.6712	22.9919
11BR049-T	Tumor	BRCA	20.53	19.3465	1.18258	18.4944	NA	NA	NA	20.5935	NA	NA	NA	NA	NA	NA	NA	NA	NA	NA	NA	NA	18.4368	NA	NA	NA	NA	NA	20.4051	18.8027	NA	NA	NA	NA	NA	NA	NA	NA	NA	NA	NA	NA	NA	NA	31.5483	26.0938	NA	17.9314	22.399
11BR050-T	Tumor	BRCA	18.9713	17.2942	-0.777934	17.913	NA	NA	NA	NA	NA	NA	NA	NA	NA	NA	NA	18.0793	NA	16.283	NA	NA	NA	NA	NA	NA	NA	NA	20.8116	18.2298	NA	NA	NA	NA	14.7533	NA	NA	NA	15.8962	NA	NA	NA	NA	16.3874	32.8334	24.9947	NA	NA	22.651
11BR051-T	Tumor	BRCA	19.9466	19.2483	1.11871	NA	17.5092	NA	NA	20.857	NA	NA	NA	NA	NA	NA	NA	18.794	NA	NA	NA	NA	NA	NA	NA	NA	NA	NA	20.1617	18.9194	NA	NA	NA	NA	NA	NA	NA	NA	NA	NA	NA	NA	NA	NA	32.9433	25.9683	NA	17.1817	22.9562
11BR053-T	Tumor	BRCA	21.6133	19.2974	1.06967	NA	17.3355	NA	NA	20.2951	19.3565	NA	NA	NA	NA	NA	NA	19.2414	NA	NA	NA	NA	NA	NA	NA	NA	NA	NA	20.6156	18.9402	NA	NA	NA	NA	NA	NA	NA	NA	NA	NA	NA	NA	NA	NA	32.2732	26.0601	NA	17.654	22.7941
11BR054-T	Tumor	BRCA	19.9468	17.8353	-0.2943	17.1543	17.1166	16.1518	NA	19.8802	18.4747	NA	NA	NA	NA	NA	NA	18.3674	NA	NA	NA	NA	17.2549	NA	NA	16.5362	18.669	NA	20.3135	18.8276	NA	NA	NA	NA	NA	NA	NA	NA	15.9192	NA	NA	NA	NA	17.1932	31.145	25.6599	NA	NA	23.6739
11BR055-T	Tumor	BRCA	20.1267	18.5807	0.440511	18.5814	17.3085	NA	NA	NA	NA	NA	NA	NA	NA	NA	NA	NA	NA	NA	NA	NA	NA	NA	NA	NA	18.7504	NA	21.0797	18.7495	NA	NA	NA	NA	NA	NA	NA	NA	NA	NA	NA	NA	NA	17.0145	32.79	25.7041	NA	NA	22.6405
11BR056-T	Tumor	BRCA	19.6862	17.7381	-0.376138	18.4655	16.9684	NA	NA	17.9906	NA	NA	NA	NA	NA	NA	NA	18.3658	NA	NA	NA	NA	NA	NA	NA	NA	18.8204	NA	20.2515	NA	NA	NA	NA	NA	NA	14.0061	NA	NA	NA	NA	NA	NA	NA	17.0363	32.235	25.4638	16.75	NA	22.0929
11BR057-T	Tumor	BRCA	21.3348	18.0915	-0.119783	NA	16.8941	16.7353	NA	17.5966	NA	NA	NA	NA	NA	NA	NA	21.1949	NA	NA	NA	NA	18.5844	NA	NA	NA	18.298	NA	21.0885	NA	NA	NA	NA	16.9096	NA	NA	15.9274	NA	NA	NA	NA	NA	NA	17.6867	30.8245	25.5808	NA	NA	23.9126
11BR058-T	Tumor	BRCA	19.6178	18.4853	0.375102	NA	17.2223	NA	NA	20.3088	NA	NA	NA	NA	NA	NA	NA	19.4813	NA	17.936	NA	NA	18.9626	NA	NA	NA	18.7163	NA	NA	NA	NA	NA	NA	16.7698	NA	NA	NA	NA	NA	NA	NA	NA	NA	NA	32.6675	25.8163	NA	18.1418	22.4135
11BR059-T	Tumor	BRCA	19.6889	19.6944	1.58001	NA	17.1419	NA	NA	21.6186	NA	NA	NA	NA	NA	NA	NA	20.1101	NA	NA	NA	NA	NA	NA	NA	NA	NA	NA	20.8405	18.7609	NA	NA	NA	NA	NA	NA	NA	NA	NA	NA	NA	NA	NA	NA	32.1702	26.0659	NA	18.0743	22.6116
11BR060-T	Tumor	BRCA	20.1418	17.9544	-0.186657	17.8752	17.2175	17.4453	NA	20.328	NA	NA	NA	NA	15.1394	NA	NA	18.0848	NA	NA	NA	NA	17.0026	NA	NA	NA	NA	NA	20.0153	18.4815	NA	NA	NA	NA	NA	NA	NA	NA	NA	NA	NA	NA	NA	NA	32.151	26.2145	NA	17.8107	22.4663
11BR072-T	Tumor	BRCA	18.1438	17.5923	-0.431053	18.3526	17.5405	NA	NA	17.9018	NA	NA	NA	NA	NA	NA	NA	NA	NA	NA	NA	NA	NA	NA	NA	NA	18.3639	NA	19.9994	NA	NA	NA	NA	NA	NA	14.0798	NA	NA	NA	NA	NA	NA	NA	16.9083	32.5919	25.2264	17.1823	NA	22.7615
11BR073-T	Tumor	BRCA	20.5314	19.3634	1.19944	NA	NA	NA	NA	20.3303	NA	NA	NA	NA	NA	NA	NA	NA	NA	NA	NA	NA	NA	NA	NA	NA	NA	NA	20.4409	19.0191	NA	NA	NA	17.6635	NA	NA	NA	NA	NA	NA	NA	NA	NA	NA	31.6169	25.5252	NA	NA	22.8033
11BR074-T	Tumor	BRCA	20.0317	18.8968	0.762191	17.2885	NA	NA	NA	19.9882	NA	NA	NA	NA	NA	NA	NA	NA	NA	NA	NA	NA	17.6829	NA	NA	NA	NA	NA	20.3738	19.1504	NA	NA	NA	NA	NA	NA	NA	NA	NA	NA	NA	NA	NA	NA	32.8615	25.4675	NA	17.0638	22.8716
11BR075-T	Tumor	BRCA	21.6844	19.3915	1.15958	NA	17.0106	NA	NA	19.9643	NA	NA	NA	NA	NA	NA	NA	20.321	NA	NA	NA	NA	NA	NA	NA	NA	NA	NA	20.5849	19.0768	NA	NA	NA	NA	NA	NA	NA	NA	NA	NA	NA	NA	NA	NA	31.3287	25.7932	NA	18.5985	24.8946
11BR076-T	Tumor	BRCA	20.4124	18.7605	0.603533	18.5442	NA	NA	NA	20.4171	NA	NA	NA	NA	NA	NA	NA	18.6159	NA	16.782	NA	NA	17.821	NA	NA	NA	NA	NA	20.5918	18.5518	NA	NA	NA	NA	NA	NA	NA	NA	NA	NA	NA	NA	NA	NA	32.3332	25.8108	16.9841	18.3806	22.3123
11BR078-T	Tumor	BRCA	20.175	18.6868	0.543818	18.3395	NA	NA	NA	20.0353	NA	NA	NA	NA	NA	NA	NA	19.3235	NA	16.5921	NA	NA	18.0129	NA	NA	NA	NA	NA	20.3653	18.1392	NA	NA	NA	NA	NA	NA	NA	NA	NA	NA	NA	NA	NA	NA	32.159	25.614	16.8542	18.2014	23.2054
11BR080-T	Tumor	BRCA	21.4208	19.0935	0.877145	NA	17.6423	NA	NA	21.7014	NA	NA	NA	NA	NA	NA	NA	20.9117	NA	17.6354	NA	NA	18.4098	NA	NA	NA	19.4918	NA	NA	NA	NA	NA	NA	17.8624	NA	NA	NA	NA	NA	NA	NA	NA	NA	NA	32.0591	26.5512	NA	18.4992	22.106
11CO005-N	Normal	COAD	NA	19.355	NA	NA	NA	NA	NA	NA	NA	NA	NA	NA	NA	NA	NA	NA	NA	NA	NA	NA	19.1191	NA	NA	NA	NA	NA	NA	19.5909	NA	NA	NA	NA	NA	NA	NA	NA	NA	NA	NA	NA	NA	NA	31.5347	24.3016	NA	NA	NA
11CO005-T	Tumor	COAD	NA	19.4829	NA	NA	NA	NA	NA	NA	NA	NA	NA	NA	NA	NA	NA	NA	NA	NA	NA	NA	19.3433	NA	NA	NA	NA	NA	NA	19.6225	NA	NA	NA	NA	NA	NA	NA	NA	NA	NA	NA	NA	NA	NA	31.4699	24.2821	NA	NA	NA
11CO007-N	Normal	COAD	NA	19.7653	NA	NA	NA	NA	NA	20.0431	NA	NA	NA	NA	NA	NA	NA	NA	NA	NA	NA	NA	19.4874	NA	NA	NA	NA	NA	NA	NA	NA	NA	NA	NA	NA	NA	NA	NA	NA	NA	NA	NA	NA	NA	31.2427	24.2947	NA	NA	NA
11CO007-T	Tumor	COAD	17.4875	19.689	1.70431	NA	NA	NA	NA	21.1254	NA	NA	NA	NA	NA	NA	NA	NA	NA	NA	NA	NA	19.9168	NA	NA	NA	NA	NA	19.5223	20.1811	NA	NA	NA	NA	NA	NA	NA	NA	17.6995	NA	NA	NA	NA	NA	31.0537	24.937	NA	NA	NA
11CO008-N	Normal	COAD	NA	18.5091	NA	NA	NA	NA	NA	19.6734	NA	NA	NA	NA	NA	NA	NA	NA	NA	NA	NA	NA	18.6959	NA	NA	NA	NA	NA	17.1581	NA	NA	NA	NA	NA	NA	NA	NA	NA	NA	NA	NA	NA	NA	NA	31.3409	24.3916	NA	NA	NA
11CO008-T	Tumor	COAD	NA	18.7045	NA	NA	NA	NA	NA	20.296	NA	NA	NA	NA	NA	NA	NA	NA	NA	NA	NA	NA	18.9285	NA	NA	NA	NA	NA	16.889	NA	NA	NA	NA	NA	NA	NA	NA	NA	NA	NA	NA	NA	NA	NA	31.411	24.2414	NA	NA	NA
11CO010-N	Normal	COAD	NA	18.045	NA	NA	NA	NA	NA	19.6712	NA	16.3885	NA	NA	NA	NA	NA	NA	NA	NA	NA	NA	18.902	NA	NA	NA	NA	NA	NA	17.2184	NA	NA	NA	NA	NA	NA	NA	NA	NA	NA	NA	NA	NA	NA	31.4176	24.4119	NA	NA	NA
11CO010-T	Tumor	COAD	NA	20.5359	NA	NA	NA	NA	NA	NA	NA	NA	NA	NA	NA	NA	NA	NA	NA	NA	NA	NA	21.1497	NA	NA	NA	NA	NA	NA	19.9221	NA	NA	NA	NA	NA	NA	NA	NA	NA	NA	NA	NA	NA	NA	31.0263	24.8887	NA	NA	NA
11CO018-N	Normal	COAD	17.3655	17.9986	0.0210319	NA	NA	NA	NA	NA	NA	NA	NA	NA	NA	NA	NA	NA	NA	NA	NA	NA	19.3774	NA	NA	NA	NA	NA	17.9279	NA	NA	NA	NA	NA	NA	NA	NA	NA	16.6904	NA	NA	NA	NA	NA	31.3959	24.1001	NA	NA	NA
11CO018-T	Tumor	COAD	NA	20.3929	NA	NA	NA	NA	NA	20.6971	NA	NA	NA	NA	NA	NA	NA	NA	NA	NA	NA	NA	20.0887	NA	NA	NA	NA	NA	NA	NA	NA	NA	NA	NA	NA	NA	NA	NA	NA	NA	NA	NA	NA	NA	31.2492	25.0223	NA	NA	NA
11CO019-N	Normal	COAD	NA	18.8037	NA	NA	NA	NA	NA	19.6966	NA	NA	NA	NA	NA	NA	NA	NA	NA	NA	NA	NA	20.0331	NA	NA	NA	NA	NA	16.6816	NA	NA	NA	NA	NA	NA	NA	NA	NA	NA	NA	NA	NA	NA	NA	31.4793	24.4698	NA	NA	NA
11CO019-T	Tumor	COAD	NA	19.2966	NA	NA	NA	NA	NA	20.6736	NA	NA	NA	NA	NA	NA	NA	NA	NA	NA	NA	NA	19.6141	NA	NA	NA	NA	NA	17.6022	NA	NA	NA	NA	NA	NA	NA	NA	NA	NA	NA	NA	NA	NA	NA	31.4503	24.3553	NA	NA	NA
11CO020-N	Normal	COAD	NA	19.3984	NA	NA	NA	NA	NA	NA	NA	NA	NA	NA	NA	NA	NA	NA	NA	NA	NA	NA	19.499	NA	NA	NA	NA	NA	NA	19.2977	NA	NA	NA	NA	NA	NA	NA	NA	NA	NA	NA	NA	NA	NA	31.3919	24.2219	NA	NA	NA
11CO020-T	Tumor	COAD	16.5932	18.922	0.989937	NA	NA	NA	NA	20.6908	NA	NA	NA	NA	NA	NA	NA	NA	NA	NA	NA	NA	19.3867	NA	NA	NA	NA	NA	18.4064	19.4467	NA	NA	NA	NA	NA	NA	NA	NA	16.6793	NA	NA	NA	NA	NA	30.9218	24.5498	NA	NA	NA
11CO021-N	Normal	COAD	NA	20.0346	NA	NA	NA	NA	NA	20.2786	NA	NA	NA	NA	NA	NA	NA	NA	NA	NA	NA	NA	19.7905	NA	NA	NA	NA	NA	NA	NA	NA	NA	NA	NA	NA	NA	NA	NA	NA	NA	NA	NA	NA	NA	31.6472	24.4746	NA	NA	NA
11CO021-T	Tumor	COAD	NA	19.786	NA	NA	NA	NA	NA	20.8931	NA	NA	NA	NA	NA	NA	NA	NA	NA	NA	NA	NA	19.6351	NA	NA	NA	NA	NA	18.7242	19.8914	NA	NA	NA	NA	NA	NA	NA	NA	NA	NA	NA	NA	NA	NA	31.3192	25.0064	NA	NA	NA
11CO022-N	Normal	COAD	NA	18.6239	NA	NA	NA	NA	NA	NA	NA	NA	NA	NA	NA	NA	NA	NA	NA	NA	NA	NA	19.1395	NA	NA	NA	NA	NA	17.6634	19.0689	NA	NA	NA	NA	NA	NA	NA	NA	NA	NA	NA	NA	NA	NA	31.572	24.229	NA	NA	NA
11CO022-T	Tumor	COAD	NA	18.8078	NA	NA	NA	NA	NA	20.6926	NA	17.047	NA	NA	NA	NA	NA	NA	NA	NA	NA	NA	20.7036	NA	NA	NA	NA	NA	18.9625	NA	NA	NA	NA	NA	NA	NA	NA	NA	16.6333	NA	NA	NA	NA	NA	31.1548	24.6518	NA	NA	NA
11CO027-N	Normal	COAD	NA	19.3024	NA	NA	NA	NA	NA	19.719	NA	NA	NA	NA	NA	NA	NA	NA	NA	NA	NA	NA	18.8857	NA	NA	NA	NA	NA	NA	NA	NA	NA	NA	NA	NA	NA	NA	NA	NA	NA	NA	NA	NA	NA	31.3558	24.1409	NA	NA	NA
11CO027-T	Tumor	COAD	17.1686	19.4606	1.49465	NA	NA	NA	NA	20.8886	NA	NA	NA	NA	NA	NA	NA	NA	NA	NA	NA	NA	19.7187	NA	NA	NA	NA	NA	19.3349	19.9356	NA	NA	NA	NA	NA	NA	NA	NA	17.4252	NA	NA	NA	NA	NA	31.1394	25.0238	NA	NA	NA
11CO030-N	Normal	COAD	16.8761	17.8697	-0.07902	NA	NA	NA	NA	20.0687	NA	NA	NA	NA	NA	NA	NA	14.7601	NA	NA	NA	NA	19.3653	NA	NA	NA	NA	NA	18.6121	17.798	NA	NA	NA	NA	NA	NA	NA	NA	16.614	NA	NA	NA	NA	NA	31.4795	24.5589	NA	NA	NA
11CO030-T	Tumor	COAD	NA	20.6424	NA	NA	NA	NA	NA	20.5185	NA	NA	NA	NA	NA	NA	NA	NA	NA	NA	NA	NA	20.7664	NA	NA	NA	NA	NA	NA	NA	NA	NA	NA	NA	NA	NA	NA	NA	NA	NA	NA	NA	NA	NA	31.3571	24.4988	NA	NA	NA
11CO031-N	Normal	COAD	NA	19.1305	NA	NA	NA	NA	NA	20.1842	NA	NA	NA	NA	NA	NA	NA	NA	NA	NA	NA	NA	18.0768	NA	NA	NA	NA	NA	NA	NA	NA	NA	NA	NA	NA	NA	NA	NA	NA	NA	NA	NA	NA	NA	31.5415	24.0881	NA	NA	NA
11CO031-T	Tumor	COAD	NA	NA	NA	NA	NA	NA	NA	NA	NA	NA	NA	NA	NA	NA	NA	NA	NA	NA	NA	NA	NA	NA	NA	NA	NA	NA	NA	NA	NA	NA	NA	NA	NA	NA	NA	NA	NA	NA	NA	NA	NA	NA	30.9558	25.4591	NA	NA	NA
11CO032-N	Normal	COAD	NA	NA	NA	NA	NA	NA	NA	NA	NA	NA	NA	NA	NA	NA	NA	NA	NA	NA	NA	NA	NA	NA	NA	NA	NA	NA	NA	NA	NA	NA	NA	NA	NA	NA	NA	NA	NA	NA	NA	NA	NA	NA	31.3573	24.3686	NA	NA	NA
11CO032-T	Tumor	COAD	NA	20.4082	NA	NA	NA	NA	NA	20.9783	NA	NA	NA	NA	NA	NA	NA	NA	NA	NA	NA	NA	19.8381	NA	NA	NA	NA	NA	NA	NA	NA	NA	NA	NA	NA	NA	NA	NA	NA	NA	NA	NA	NA	NA	31.0608	24.6923	NA	NA	NA
11CO033-N	Normal	COAD	NA	19.1911	NA	NA	NA	NA	NA	19.9192	NA	NA	NA	NA	NA	NA	NA	NA	NA	NA	NA	NA	19.2861	NA	NA	NA	NA	NA	18.2862	19.2726	NA	NA	NA	NA	NA	NA	NA	NA	NA	NA	NA	NA	NA	NA	31.361	24.3745	NA	NA	NA
11CO033-T	Tumor	COAD	16.8393	19.1688	1.22227	NA	NA	NA	NA	20.6515	NA	NA	NA	NA	NA	NA	NA	NA	NA	NA	NA	NA	19.9228	NA	NA	NA	NA	NA	19.0025	19.925	NA	NA	NA	NA	NA	NA	NA	NA	16.3422	NA	NA	NA	NA	NA	31.5432	24.7198	NA	NA	NA
11CO036-N	Normal	COAD	16.6731	17.5241	-0.412689	NA	NA	NA	NA	19.6657	NA	NA	NA	NA	NA	NA	NA	14.0422	NA	NA	NA	NA	18.7455	NA	NA	NA	NA	NA	18.3834	17.6596	NA	NA	NA	NA	NA	NA	NA	NA	16.6478	NA	NA	NA	NA	NA	31.2897	24.1916	NA	NA	NA
11CO036-T	Tumor	COAD	17.1451	19.4638	1.49927	NA	NA	NA	NA	21.1953	NA	NA	NA	NA	NA	NA	NA	NA	NA	NA	NA	NA	19.8893	NA	NA	NA	NA	NA	18.2863	20.3886	NA	NA	NA	NA	NA	NA	NA	NA	17.5595	NA	NA	NA	NA	NA	31.4908	25.3003	NA	NA	NA
11CO037-N	Normal	COAD	17.4897	18.3768	0.391958	NA	NA	NA	NA	19.6926	NA	NA	NA	NA	NA	NA	NA	NA	NA	NA	NA	NA	18.9837	NA	NA	NA	NA	NA	17.49	19.2277	NA	NA	NA	NA	NA	NA	NA	NA	16.49	NA	NA	NA	NA	NA	31.4112	24.2774	NA	NA	NA
11CO037-T	Tumor	COAD	NA	19.4899	NA	NA	NA	NA	NA	20.313	NA	NA	NA	NA	NA	NA	NA	NA	NA	NA	NA	NA	19.5343	NA	NA	NA	NA	NA	18.7528	19.3595	NA	NA	NA	NA	NA	NA	NA	NA	NA	NA	NA	NA	NA	NA	31.4308	24.5865	NA	NA	NA
11CO039-N	Normal	COAD	NA	18.7643	NA	NA	NA	NA	NA	20.1686	NA	NA	NA	NA	NA	NA	NA	NA	NA	NA	NA	NA	18.5807	NA	NA	NA	NA	NA	NA	17.5435	NA	NA	NA	NA	NA	NA	NA	NA	NA	NA	NA	NA	NA	NA	31.4996	24.4466	NA	NA	NA
11CO039-T	Tumor	COAD	NA	20.0328	NA	NA	NA	NA	NA	NA	NA	NA	NA	NA	NA	NA	NA	NA	NA	NA	NA	NA	20.2424	NA	NA	NA	NA	NA	NA	19.8232	NA	NA	NA	NA	NA	NA	NA	NA	NA	NA	NA	NA	NA	NA	30.8865	25.1958	NA	NA	NA
11CO042-N	Normal	COAD	NA	18.9028	NA	NA	NA	NA	NA	20.116	NA	NA	NA	NA	NA	NA	NA	NA	NA	NA	NA	NA	19.7032	NA	NA	NA	NA	NA	16.8894	NA	NA	NA	NA	NA	NA	NA	NA	NA	NA	NA	NA	NA	NA	NA	31.1515	24.6131	NA	NA	NA
11CO042-T	Tumor	COAD	NA	18.9502	NA	NA	NA	NA	NA	20.9976	NA	16.2678	NA	NA	NA	NA	NA	NA	NA	NA	NA	NA	20.4987	NA	NA	NA	NA	NA	NA	18.0366	NA	NA	NA	NA	NA	NA	NA	NA	NA	NA	NA	NA	NA	NA	31.403	24.7414	NA	NA	NA
11CO043-N	Normal	COAD	NA	18.5056	NA	NA	NA	NA	NA	20.0079	NA	16.1308	NA	NA	NA	NA	NA	NA	NA	NA	NA	NA	18.8367	NA	NA	NA	NA	NA	NA	19.0469	NA	NA	NA	NA	NA	NA	NA	NA	NA	NA	NA	NA	NA	NA	31.7355	24.466	NA	NA	NA
11CO043-T	Tumor	COAD	NA	19.8368	NA	NA	NA	NA	NA	20.4012	NA	NA	NA	NA	NA	NA	NA	NA	NA	NA	NA	NA	19.2725	NA	NA	NA	NA	NA	NA	NA	NA	NA	NA	NA	NA	NA	NA	NA	NA	NA	NA	NA	NA	NA	31.6253	24.4092	NA	NA	NA
11CO044-N	Normal	COAD	NA	19.8744	NA	NA	NA	NA	NA	NA	NA	NA	NA	NA	NA	NA	NA	NA	NA	NA	NA	NA	20.0345	NA	NA	NA	NA	NA	NA	19.7142	NA	NA	NA	NA	NA	NA	NA	NA	NA	NA	NA	NA	NA	NA	31.3432	24.5452	NA	NA	NA
11CO044-T	Tumor	COAD	NA	NA	NA	NA	NA	NA	NA	NA	NA	NA	NA	NA	NA	NA	NA	NA	NA	NA	NA	NA	NA	NA	NA	NA	NA	NA	NA	NA	NA	NA	NA	NA	NA	NA	NA	NA	NA	NA	NA	NA	NA	NA	30.9837	24.8602	NA	NA	NA
11CO045-N	Normal	COAD	NA	18.8641	NA	NA	NA	NA	NA	NA	NA	NA	NA	NA	NA	NA	NA	NA	NA	NA	NA	NA	18.555	NA	NA	NA	NA	NA	NA	19.1732	NA	NA	NA	NA	NA	NA	NA	NA	NA	NA	NA	NA	NA	NA	31.258	24.5426	NA	NA	NA
11CO045-T	Tumor	COAD	NA	20.5514	NA	NA	NA	NA	NA	20.8826	NA	NA	NA	NA	NA	NA	NA	NA	NA	NA	NA	NA	20.2202	NA	NA	NA	NA	NA	NA	NA	NA	NA	NA	NA	NA	NA	NA	NA	NA	NA	NA	NA	NA	NA	31.4845	24.5917	NA	NA	NA
11CO047-N	Normal	COAD	NA	19.6901	NA	NA	NA	NA	NA	NA	NA	NA	NA	NA	NA	NA	NA	NA	NA	NA	NA	NA	19.6901	NA	NA	NA	NA	NA	NA	NA	NA	NA	NA	NA	NA	NA	NA	NA	NA	NA	NA	NA	NA	NA	31.1485	24.3635	NA	NA	NA
11CO047-T	Tumor	COAD	NA	19.2009	NA	NA	NA	NA	NA	NA	NA	NA	NA	NA	NA	NA	NA	NA	NA	NA	NA	NA	19.2009	NA	NA	NA	NA	NA	NA	NA	NA	NA	NA	NA	NA	NA	NA	NA	NA	NA	NA	NA	NA	NA	31.4876	25.0659	NA	NA	NA
11CO048-N	Normal	COAD	NA	19.3741	NA	NA	NA	NA	NA	NA	NA	NA	NA	NA	NA	NA	NA	NA	NA	NA	NA	NA	19.3741	NA	NA	NA	NA	NA	NA	NA	NA	NA	NA	NA	NA	NA	NA	NA	NA	NA	NA	NA	NA	NA	31.373	24.2018	NA	NA	NA
11CO048-T	Tumor	COAD	NA	20.7147	NA	NA	NA	NA	NA	20.7588	NA	NA	NA	NA	NA	NA	NA	NA	NA	NA	NA	NA	20.6706	NA	NA	NA	NA	NA	NA	NA	NA	NA	NA	NA	NA	NA	NA	NA	NA	NA	NA	NA	NA	NA	31.4778	24.3442	NA	NA	NA
11CO051-N	Normal	COAD	17.0738	18.4064	0.446001	NA	NA	NA	NA	20.0184	NA	NA	NA	NA	NA	NA	NA	NA	NA	NA	NA	NA	19.6258	NA	NA	NA	NA	NA	17.7671	18.5942	NA	NA	NA	NA	NA	NA	NA	NA	16.0263	NA	NA	NA	NA	NA	31.5085	24.6017	NA	NA	NA
11CO051-T	Tumor	COAD	16.2917	18.6174	0.703108	NA	NA	NA	NA	NA	NA	NA	NA	NA	NA	NA	NA	NA	NA	NA	NA	NA	19.9331	NA	NA	NA	NA	NA	19.236	NA	NA	NA	NA	NA	NA	NA	NA	NA	16.683	NA	NA	NA	NA	NA	31.5219	25.0908	NA	NA	NA
11CO052-N	Normal	COAD	NA	19.587	NA	NA	NA	NA	NA	20.0319	NA	NA	NA	NA	NA	NA	NA	NA	NA	NA	NA	NA	19.142	NA	NA	NA	NA	NA	NA	NA	NA	NA	NA	NA	NA	NA	NA	NA	NA	NA	NA	NA	NA	NA	31.3737	24.5736	NA	NA	NA
11CO052-T	Tumor	COAD	NA	18.851	NA	NA	NA	NA	NA	20.8011	NA	NA	NA	NA	NA	NA	NA	NA	NA	NA	NA	NA	20.7751	NA	NA	NA	14.1518	NA	18.7978	19.7292	NA	NA	NA	NA	NA	NA	NA	NA	NA	NA	NA	NA	NA	NA	31.1606	24.6013	NA	15.6774	NA
11CO053-N	Normal	COAD	NA	NA	NA	NA	NA	NA	NA	NA	NA	NA	NA	NA	NA	NA	NA	NA	NA	NA	NA	NA	NA	NA	NA	NA	NA	NA	NA	NA	NA	NA	NA	NA	NA	NA	NA	NA	NA	NA	NA	NA	NA	NA	31.1638	24.3645	NA	NA	NA
11CO053-T	Tumor	COAD	NA	19.5325	NA	NA	NA	NA	NA	20.9978	NA	NA	NA	NA	NA	NA	NA	NA	NA	NA	NA	NA	19.9797	NA	NA	NA	NA	NA	17.6201	NA	NA	NA	NA	NA	NA	NA	NA	NA	NA	NA	NA	NA	NA	NA	31.1753	24.8215	NA	NA	NA
11CO054-N	Normal	COAD	NA	19.6443	NA	NA	NA	NA	NA	19.9557	NA	NA	NA	NA	NA	NA	NA	NA	NA	NA	NA	NA	19.3328	NA	NA	NA	NA	NA	NA	NA	NA	NA	NA	NA	NA	NA	NA	NA	NA	NA	NA	NA	NA	NA	31.243	24.3829	NA	NA	NA
11CO054-T	Tumor	COAD	NA	20.0371	NA	NA	NA	NA	NA	21.1328	NA	NA	NA	NA	NA	NA	NA	NA	NA	NA	NA	NA	20.2011	NA	NA	NA	NA	NA	18.9491	19.8654	NA	NA	NA	NA	NA	NA	NA	NA	NA	NA	NA	NA	NA	NA	31.1231	24.8019	NA	NA	NA
11CO057-N	Normal	COAD	NA	19.5842	NA	NA	NA	NA	NA	NA	NA	NA	NA	NA	NA	NA	NA	NA	NA	NA	NA	NA	19.5154	NA	NA	NA	NA	NA	NA	19.6531	NA	NA	NA	NA	NA	NA	NA	NA	NA	NA	NA	NA	NA	NA	31.5461	24.3171	NA	NA	NA
11CO057-T	Tumor	COAD	NA	19.343	NA	NA	NA	NA	NA	20.3761	NA	16.6585	NA	NA	NA	NA	NA	NA	NA	NA	NA	NA	20.625	NA	NA	NA	NA	NA	NA	19.7124	NA	NA	NA	NA	NA	NA	NA	NA	NA	NA	NA	NA	NA	NA	31.2701	24.3589	NA	NA	NA
11CO058-N	Normal	COAD	NA	18.7109	NA	NA	NA	NA	NA	19.5391	NA	NA	NA	NA	NA	NA	NA	NA	NA	NA	NA	NA	18.896	NA	NA	NA	NA	NA	NA	17.6978	NA	NA	NA	NA	NA	NA	NA	NA	NA	NA	NA	NA	NA	NA	31.4224	24.476	NA	NA	NA
11CO058-T	Tumor	COAD	16.6557	19.3536	1.41792	NA	NA	NA	NA	20.7767	NA	NA	NA	NA	NA	NA	NA	NA	NA	NA	NA	NA	20.9622	NA	NA	NA	NA	NA	18.6034	19.4534	NA	NA	NA	NA	NA	NA	NA	NA	16.9725	NA	NA	NA	NA	NA	31.4908	25.032	NA	NA	NA
11CO060-N	Normal	COAD	NA	18.7899	NA	NA	NA	NA	NA	20.1496	NA	16.1221	NA	NA	NA	NA	NA	NA	NA	NA	NA	NA	19.5362	NA	NA	NA	NA	NA	NA	19.3515	NA	NA	NA	NA	NA	NA	NA	NA	NA	NA	NA	NA	NA	NA	31.3501	24.6522	NA	NA	NA
11CO061-N	Normal	COAD	NA	19.4458	NA	NA	NA	NA	NA	NA	NA	NA	NA	NA	NA	NA	NA	NA	NA	NA	NA	NA	19.4458	NA	NA	NA	NA	NA	NA	NA	NA	NA	NA	NA	NA	NA	NA	NA	NA	NA	NA	NA	NA	NA	31.1547	24.3211	NA	NA	NA
11CO061-T	Tumor	COAD	16.2949	17.781	-0.13349	NA	NA	NA	NA	20.7366	NA	NA	NA	NA	NA	NA	NA	14.3821	NA	NA	NA	NA	NA	NA	NA	NA	NA	NA	19.2587	17.5807	NA	NA	NA	NA	NA	NA	NA	NA	16.9467	NA	NA	NA	NA	NA	31.3846	24.7385	NA	NA	NA
11CO062-N	Normal	COAD	NA	18.5737	NA	NA	NA	NA	NA	NA	NA	NA	NA	NA	NA	NA	NA	NA	NA	NA	NA	NA	18.9872	NA	NA	NA	NA	NA	17.4502	19.2838	NA	NA	NA	NA	NA	NA	NA	NA	NA	NA	NA	NA	NA	NA	31.6233	24.0889	NA	NA	NA
11CO062-T	Tumor	COAD	NA	19.7763	NA	NA	NA	NA	NA	NA	NA	NA	NA	NA	NA	NA	NA	NA	NA	NA	NA	NA	19.7763	NA	NA	NA	NA	NA	NA	NA	NA	NA	NA	NA	NA	NA	NA	NA	NA	NA	NA	NA	NA	NA	31.315	24.8724	NA	NA	NA
11CO070-N	Normal	COAD	18.0861	17.8467	-0.173303	NA	NA	NA	NA	NA	NA	NA	NA	NA	NA	NA	NA	NA	NA	NA	NA	NA	17.9227	NA	NA	NA	NA	NA	18.0044	NA	NA	NA	NA	NA	NA	NA	NA	NA	17.6129	NA	NA	NA	NA	NA	31.5206	24.222	NA	NA	NA
11CO070-T	Tumor	COAD	NA	20.1111	NA	NA	NA	NA	NA	21.2891	NA	NA	NA	NA	NA	NA	NA	NA	NA	NA	NA	NA	20.3884	NA	NA	NA	NA	NA	NA	18.6559	NA	NA	NA	NA	NA	NA	NA	NA	NA	NA	NA	NA	NA	NA	31.5794	25.2245	NA	NA	NA
11CO072-N	Normal	COAD	NA	19.235	NA	NA	NA	NA	NA	NA	NA	NA	NA	NA	NA	NA	NA	NA	NA	NA	NA	NA	19.2291	NA	NA	NA	NA	NA	NA	19.2409	NA	NA	NA	NA	NA	NA	NA	NA	NA	NA	NA	NA	NA	NA	31.2782	24.2472	NA	NA	NA
11CO072-T	Tumor	COAD	NA	19.0273	NA	NA	NA	NA	NA	NA	NA	NA	NA	NA	NA	NA	NA	NA	NA	NA	NA	NA	19.0273	NA	NA	NA	NA	NA	NA	NA	NA	NA	NA	NA	NA	NA	NA	NA	NA	NA	NA	NA	NA	NA	31.3861	24.6214	NA	NA	NA
11CO077-N	Normal	COAD	NA	NA	NA	NA	NA	NA	NA	NA	NA	NA	NA	NA	NA	NA	NA	NA	NA	NA	NA	NA	NA	NA	NA	NA	NA	NA	NA	NA	NA	NA	NA	NA	NA	NA	NA	NA	NA	NA	NA	NA	NA	NA	31.1666	24.4995	NA	NA	NA
11CO077-T	Tumor	COAD	NA	20.7605	NA	NA	NA	NA	NA	20.6667	NA	NA	NA	NA	NA	NA	NA	NA	NA	NA	NA	NA	20.8542	NA	NA	NA	NA	NA	NA	NA	NA	NA	NA	NA	NA	NA	NA	NA	NA	NA	NA	NA	NA	NA	31.1244	25.2431	NA	NA	NA
11CO079-N	Normal	COAD	NA	19.5353	NA	NA	NA	NA	NA	20.3169	NA	NA	NA	NA	NA	NA	NA	NA	NA	NA	NA	NA	19.0641	NA	NA	NA	NA	NA	NA	19.2248	NA	NA	NA	NA	NA	NA	NA	NA	NA	NA	NA	NA	NA	NA	31.6286	24.1234	NA	NA	NA
11CO079-T	Tumor	COAD	NA	19.9163	NA	NA	NA	NA	NA	NA	NA	NA	NA	NA	NA	NA	NA	NA	NA	NA	NA	NA	20.322	NA	NA	NA	NA	NA	NA	19.5106	NA	NA	NA	NA	NA	NA	NA	NA	NA	NA	NA	NA	NA	NA	31.3181	25.1088	NA	NA	NA
11LU013-T	Tumor	LUAD	22.9174	17.0107	-1.29381	NA	NA	15.7257	NA	NA	NA	NA	NA	NA	NA	NA	NA	NA	NA	16.6991	NA	NA	NA	NA	NA	NA	17.9755	NA	19.421	18.5492	NA	NA	NA	NA	13.6938	NA	NA	NA	NA	NA	NA	NA	NA	NA	32.1313	25.5243	NA	NA	20.0681
11LU016-T	Tumor	LUAD	21.4703	19.4289	1.20957	NA	NA	NA	NA	NA	NA	NA	NA	NA	NA	NA	NA	NA	NA	NA	NA	NA	19.8328	NA	NA	NA	18.3414	NA	20.1124	NA	NA	NA	NA	NA	NA	NA	NA	NA	NA	NA	NA	NA	NA	NA	31.7332	26.1235	NA	17.3528	20.1781
11LU022-T	Tumor	LUAD	23.1487	19.0649	0.746775	NA	NA	NA	NA	19.5619	NA	NA	NA	NA	NA	NA	NA	20.5565	NA	17.0592	NA	NA	21.0805	NA	NA	NA	19.4654	NA	20.1127	18.3263	NA	NA	NA	NA	NA	NA	NA	NA	NA	NA	16.3569	NA	NA	NA	31.7218	26.3212	NA	17.6361	20.2757
11LU035-T	Tumor	LUAD	22.9527	18.1173	-0.189349	NA	NA	16.1221	NA	18.5251	NA	NA	NA	NA	NA	NA	NA	18.9019	NA	16.5647	NA	NA	19.0447	NA	NA	NA	17.8291	NA	19.898	18.0526	NA	NA	NA	NA	NA	NA	NA	NA	NA	NA	NA	NA	NA	NA	32.1612	25.8377	NA	NA	20.3459
11OV002-N	Normal	OV	NA	18.993	NA	NA	17.1305	17.5106	NA	20.8391	NA	NA	NA	NA	NA	NA	NA	16.6756	NA	NA	NA	NA	NA	NA	NA	NA	18.9412	NA	20.9628	20.5975	NA	NA	NA	19.9001	NA	NA	NA	NA	17.1953	NA	NA	NA	NA	20.177	32.4094	25.0205	NA	21.2961	17.6586
11OV002-T	Tumor	OV	NA	19.1621	NA	NA	15.9225	NA	NA	22.2399	NA	NA	NA	NA	NA	NA	NA	NA	NA	14.4699	NA	NA	NA	NA	NA	17.0189	20.4384	NA	21.1334	21.3756	NA	NA	NA	20.4322	NA	NA	NA	NA	17.8496	NA	NA	NA	NA	20.7402	31.6234	26.5493	NA	21.7824	18.4321
11OV010-N	Normal	OV	NA	18.5019	NA	NA	NA	16.7528	NA	20.8833	NA	NA	NA	NA	15.505	NA	NA	NA	NA	NA	NA	NA	NA	NA	NA	NA	18.7694	NA	19.4964	NA	NA	NA	NA	NA	NA	NA	NA	NA	NA	NA	NA	NA	NA	19.6047	32.3616	24.8919	NA	21.1251	NA
13BR009-T	Tumor	BRCA	20.4517	18.2821	0.122775	NA	17.0251	NA	NA	20.9241	NA	NA	NA	NA	NA	NA	NA	19.3071	NA	16.4593	NA	NA	18.1727	NA	NA	NA	18.7096	NA	NA	NA	NA	NA	NA	17.3768	NA	NA	NA	NA	NA	NA	NA	NA	NA	NA	32.1617	25.9275	NA	18.5729	22.7414
13OV003-T	Tumor	OV	NA	19.6836	NA	NA	NA	NA	NA	21.0571	NA	NA	NA	NA	NA	NA	NA	NA	NA	NA	NA	NA	17.4856	NA	NA	NA	NA	NA	20.1299	20.0272	NA	NA	NA	NA	NA	NA	NA	NA	NA	NA	NA	NA	NA	19.7179	31.7535	24.726	NA	20.8006	NA
14BR005-T	Tumor	BRCA	20.7581	17.977	-0.200314	18.3062	17.4994	16.5856	NA	NA	NA	NA	NA	NA	14.9135	NA	NA	19.0871	NA	NA	NA	NA	NA	NA	NA	NA	18.7331	NA	20.7119	19.1074	NA	NA	NA	NA	NA	NA	NA	NA	NA	NA	NA	NA	NA	16.8493	31.25	25.7758	NA	NA	23.3317
14BR008-T	Tumor	BRCA	NA	17.3877	NA	NA	NA	NA	NA	NA	17.7506	NA	NA	NA	NA	NA	NA	17.0249	NA	NA	NA	NA	NA	NA	NA	NA	NA	NA	NA	NA	NA	NA	NA	NA	NA	NA	NA	NA	NA	NA	NA	NA	NA	NA	32.8771	25.1641	NA	NA	22.9134
14BR014-T	Tumor	BRCA	19.4075	18.155	0.0572374	NA	17.2094	NA	NA	19.728	NA	NA	NA	NA	NA	NA	NA	18.8926	NA	16.4667	NA	NA	18.6122	NA	NA	NA	18.9265	NA	NA	NA	NA	NA	NA	17.2499	NA	NA	NA	NA	NA	NA	NA	NA	NA	NA	32.516	25.8476	NA	19.0618	22.7691
14CO002-N	Normal	COAD	NA	19.4893	NA	NA	NA	NA	NA	20.2587	NA	NA	NA	NA	NA	NA	NA	NA	NA	NA	NA	NA	19.7084	NA	NA	NA	NA	NA	18.6691	19.3211	NA	NA	NA	NA	NA	NA	NA	NA	NA	NA	NA	NA	NA	NA	31.5821	24.5905	NA	NA	NA
14CO003-T	Tumor	COAD	NA	20.2326	NA	NA	NA	NA	NA	21.0156	NA	NA	NA	NA	NA	NA	NA	NA	NA	NA	NA	NA	19.4496	NA	NA	NA	NA	NA	NA	NA	NA	NA	NA	NA	NA	NA	NA	NA	NA	NA	NA	NA	NA	NA	30.573	25.4637	NA	NA	NA
14CO005-N	Normal	COAD	NA	NA	NA	NA	NA	NA	NA	NA	NA	NA	NA	NA	NA	NA	NA	NA	NA	NA	NA	NA	NA	NA	NA	NA	NA	NA	NA	NA	NA	NA	NA	NA	NA	NA	NA	NA	NA	NA	NA	NA	NA	NA	32.0591	23.9494	NA	NA	NA
14CO005-T	Tumor	COAD	NA	19.1311	NA	NA	NA	NA	NA	20.4354	NA	16.7366	NA	NA	NA	NA	NA	NA	NA	NA	NA	NA	20.098	NA	NA	NA	NA	NA	NA	19.2545	NA	NA	NA	NA	NA	NA	NA	NA	NA	NA	NA	NA	NA	NA	31.1852	24.6826	NA	NA	NA
14OV011-N	Normal	OV	NA	19.5633	NA	NA	NA	NA	NA	21.6562	NA	NA	NA	NA	NA	NA	NA	NA	NA	NA	NA	NA	15.931	NA	NA	NA	NA	NA	21.4655	20.4462	NA	NA	NA	NA	NA	NA	NA	NA	18.3176	NA	NA	NA	NA	NA	32.487	25.1077	NA	21.0406	NA
14OV011-T	Tumor	OV	NA	20.1555	NA	NA	17.2694	NA	NA	22.1364	NA	NA	NA	NA	NA	NA	NA	NA	NA	NA	NA	NA	NA	NA	NA	NA	20.0364	NA	22.4811	20.8247	NA	NA	NA	NA	NA	NA	NA	NA	17.4583	NA	NA	NA	NA	20.8822	31.7908	25.2385	NA	21.7332	NA
14OV029-N	Normal	OV	NA	18.9315	NA	NA	NA	16.9057	NA	20.3531	NA	NA	NA	NA	NA	NA	NA	NA	NA	NA	NA	NA	15.7893	NA	NA	NA	NA	NA	21.0392	19.4171	NA	NA	NA	NA	NA	NA	NA	NA	NA	NA	NA	NA	NA	20.0843	32.2701	24.8768	NA	21.1956	NA
15BR003-T	Tumor	BRCA	19.1006	17.7774	-0.302374	NA	17.2065	NA	NA	19.919	NA	NA	NA	NA	NA	NA	NA	17.5632	NA	16.6717	NA	NA	17.1475	NA	NA	NA	18.8389	NA	NA	NA	NA	NA	NA	17.0946	NA	NA	NA	NA	NA	NA	NA	NA	NA	NA	32.5385	25.4487	NA	19.7102	22.2816
15CO001-N	Normal	COAD	NA	18.8762	NA	NA	NA	NA	NA	19.5837	NA	NA	NA	NA	NA	NA	NA	NA	NA	NA	NA	NA	19.2928	NA	NA	NA	NA	NA	17.0626	19.5656	NA	NA	NA	NA	NA	NA	NA	NA	NA	NA	NA	NA	NA	NA	31.6512	24.2215	NA	NA	NA
15CO001-T	Tumor	COAD	NA	20.2091	NA	NA	NA	NA	NA	21.0883	NA	NA	NA	NA	NA	NA	NA	NA	NA	NA	NA	NA	21.3842	NA	NA	NA	NA	NA	NA	18.1549	NA	NA	NA	NA	NA	NA	NA	NA	NA	NA	NA	NA	NA	NA	30.4399	24.5837	NA	NA	NA
15CO002-N	Normal	COAD	17.9265	18.0604	0.0498358	NA	NA	NA	NA	NA	NA	NA	NA	NA	NA	NA	NA	NA	NA	NA	NA	NA	18.8107	NA	NA	NA	NA	NA	18.0677	NA	NA	NA	NA	NA	NA	NA	NA	NA	17.3028	NA	NA	NA	NA	NA	31.5006	24.2967	NA	NA	NA
15CO002-T	Tumor	COAD	NA	19.0547	NA	NA	NA	NA	NA	20.9067	NA	16.9278	NA	NA	NA	NA	NA	NA	NA	NA	NA	NA	20.9795	NA	NA	NA	NA	NA	19.3131	NA	NA	NA	NA	NA	NA	NA	NA	NA	17.1463	NA	NA	NA	NA	NA	30.9865	25.5595	NA	NA	NA
15OV001-N	Normal	OV	NA	18.9545	NA	NA	NA	NA	NA	NA	NA	NA	NA	NA	NA	NA	NA	NA	NA	NA	NA	NA	15.3348	NA	NA	NA	19.1861	NA	20.8378	NA	NA	NA	NA	19.3556	NA	NA	NA	NA	NA	NA	NA	NA	NA	20.0584	32.521	24.7468	NA	20.8399	NA
15OV001-T	Tumor	OV	NA	19.2364	NA	NA	17.4311	NA	NA	20.9844	NA	NA	NA	NA	NA	NA	NA	NA	NA	NA	NA	NA	NA	NA	NA	NA	19.0078	NA	20.7469	20.3865	NA	NA	NA	NA	NA	NA	NA	NA	16.3322	NA	NA	NA	NA	19.7659	31.9058	25.7367	NA	21.1957	NA
16BR012-T	Tumor	BRCA	20.8235	19.0783	0.897048	19.2177	NA	NA	NA	20.9878	NA	NA	NA	NA	NA	NA	NA	18.6001	NA	17.6727	NA	NA	18.4942	NA	NA	NA	NA	NA	21.119	19.2246	NA	NA	NA	NA	NA	NA	NA	NA	NA	17.3101	NA	NA	NA	NA	32.0933	26.5573	16.9337	18.3646	22.2288
16CO002-N	Normal	COAD	NA	18.3168	NA	NA	NA	NA	NA	NA	NA	NA	NA	NA	NA	NA	NA	NA	NA	NA	NA	NA	18.4049	NA	NA	NA	NA	NA	17.5812	18.9643	NA	NA	NA	NA	NA	NA	NA	NA	NA	NA	NA	NA	NA	NA	31.7247	24.0982	NA	NA	NA
16CO002-T	Tumor	COAD	16.3219	18.7741	0.858016	NA	NA	NA	NA	20.3156	NA	NA	NA	NA	NA	NA	NA	NA	NA	NA	NA	NA	19.0614	NA	NA	NA	NA	NA	18.6499	19.2237	NA	NA	NA	NA	NA	NA	NA	NA	16.6199	NA	NA	NA	NA	NA	30.7231	24.2052	NA	NA	NA
16CO003-N	Normal	COAD	NA	19.2703	NA	NA	NA	NA	NA	19.8445	NA	NA	NA	NA	NA	NA	NA	NA	NA	NA	NA	NA	18.8217	NA	NA	NA	NA	NA	NA	19.1446	NA	NA	NA	NA	NA	NA	NA	NA	NA	NA	NA	NA	NA	NA	31.1045	24.3792	NA	NA	NA
16CO003-T	Tumor	COAD	NA	19.5437	NA	NA	NA	NA	NA	20.7377	NA	NA	NA	NA	NA	NA	NA	NA	NA	NA	NA	NA	19.9978	NA	NA	NA	NA	NA	NA	17.8956	NA	NA	NA	NA	NA	NA	NA	NA	NA	NA	NA	NA	NA	NA	31.1482	24.1779	NA	NA	NA
16CO006-N	Normal	COAD	NA	18.9769	NA	NA	NA	NA	NA	19.9201	NA	NA	NA	NA	NA	NA	NA	NA	NA	NA	NA	NA	18.524	NA	NA	NA	NA	NA	18.5195	18.9439	NA	NA	NA	NA	NA	NA	NA	NA	NA	NA	NA	NA	NA	NA	31.7197	24.2108	NA	NA	NA
16CO006-T	Tumor	COAD	16.3797	18.3233	0.403824	NA	NA	NA	NA	20.9264	NA	NA	NA	NA	NA	NA	NA	14.8313	NA	NA	NA	NA	20.1603	NA	NA	NA	NA	NA	18.6837	18.1165	NA	NA	NA	NA	NA	NA	NA	NA	17.2216	NA	NA	NA	NA	NA	31.3606	24.6419	NA	NA	NA
16CO011-N	Normal	COAD	NA	18.0125	NA	NA	NA	NA	NA	19.2793	NA	16.4302	NA	NA	NA	NA	NA	NA	NA	NA	NA	NA	18.6233	NA	NA	NA	NA	NA	NA	17.7171	NA	NA	NA	NA	NA	NA	NA	NA	NA	NA	NA	NA	NA	NA	31.2466	24.2312	NA	NA	NA
16CO011-T	Tumor	COAD	16.0824	18.3251	0.423105	NA	NA	NA	NA	NA	NA	NA	NA	NA	NA	NA	NA	NA	NA	NA	NA	NA	20.0186	NA	NA	NA	NA	NA	18.3986	NA	NA	NA	NA	NA	NA	NA	NA	NA	16.5579	NA	NA	NA	NA	NA	30.6458	24.3833	NA	NA	NA
17OV001-N	Normal	OV	15.6941	18.8479	0.968838	NA	17.1314	NA	NA	NA	NA	NA	NA	NA	NA	NA	NA	16.55	NA	NA	NA	NA	NA	NA	NA	NA	19.3033	NA	20.2986	19.4378	NA	NA	NA	NA	NA	NA	NA	NA	NA	NA	NA	NA	NA	20.3665	31.7147	25.1442	NA	20.9842	NA
17OV001-T	Tumor	OV	15.9737	19.1759	1.28039	NA	16.9837	NA	NA	NA	NA	NA	NA	NA	NA	NA	NA	17.0206	NA	NA	NA	NA	NA	NA	NA	NA	19.6794	NA	20.4297	20.6553	NA	NA	NA	NA	NA	NA	NA	NA	NA	NA	NA	NA	NA	20.287	31.494	25.3471	NA	21.6282	NA
17OV002-N	Normal	OV	NA	19.5041	NA	NA	17.8562	NA	NA	21.41	NA	NA	NA	NA	NA	NA	NA	NA	NA	NA	NA	NA	NA	NA	NA	NA	19.5643	NA	19.5343	19.4921	NA	NA	NA	NA	NA	NA	NA	NA	NA	NA	NA	NA	NA	19.1678	32.2728	25.7957	NA	21.5953	NA
17OV002-T	Tumor	OV	NA	19.8666	NA	NA	16.5499	NA	NA	21.3601	NA	NA	NA	NA	NA	NA	NA	NA	NA	NA	NA	NA	NA	NA	NA	NA	20.6835	NA	21.2698	21.143	NA	NA	NA	NA	NA	NA	NA	NA	16.6053	NA	NA	NA	NA	21.4543	31.5449	25.4798	NA	22.2513	NA
17OV003-N	Normal	OV	NA	19.3636	NA	NA	17.1176	NA	NA	20.5707	NA	NA	NA	NA	NA	NA	NA	NA	NA	NA	NA	NA	NA	NA	NA	NA	NA	NA	20.4803	20.3918	NA	NA	NA	20.0765	NA	NA	NA	NA	16.6097	NA	NA	NA	NA	20.2986	31.9644	25.2674	NA	NA	19.5345
17OV004-N	Normal	OV	16.328	19.2621	1.3457	NA	NA	NA	NA	NA	NA	NA	NA	NA	NA	NA	NA	NA	NA	NA	NA	NA	NA	NA	NA	NA	NA	NA	20.5154	NA	NA	NA	NA	19.0002	NA	NA	NA	NA	17.2928	NA	NA	NA	NA	20.24	32.6559	25.1157	NA	20.7439	NA
17OV005-N	Normal	OV	NA	19.4363	NA	NA	16.4775	NA	NA	22.517	NA	NA	NA	NA	NA	NA	NA	NA	NA	NA	NA	NA	NA	NA	NA	NA	NA	NA	19.9751	20.2851	NA	NA	NA	19.1547	NA	NA	NA	NA	17.7341	NA	NA	NA	NA	19.9108	32.2776	25.1502	NA	NA	18.2431
17OV010-T	Tumor	OV	NA	19.8693	NA	NA	17.9615	16.1809	NA	22.459	NA	NA	NA	NA	NA	NA	NA	17.6689	NA	NA	NA	NA	NA	NA	NA	NA	20.5129	NA	22.1411	21.7939	NA	NA	NA	20.5174	NA	NA	NA	NA	18.2085	NA	NA	NA	NA	21.2491	31.6069	26.6744	NA	21.9458	17.3657
17OV011-T	Tumor	OV	NA	18.9182	NA	NA	16.0317	NA	NA	20.9242	NA	NA	NA	NA	NA	NA	NA	NA	NA	NA	NA	NA	NA	NA	NA	NA	18.6084	NA	19.8457	21.2548	NA	NA	NA	NA	NA	NA	NA	NA	16.2377	NA	NA	NA	NA	19.5247	31.97	24.7801	NA	20.4403	NA
17OV013-T	Tumor	OV	NA	19.172	NA	NA	NA	16.6147	NA	20.8966	NA	NA	NA	NA	NA	NA	NA	NA	NA	NA	NA	NA	16.8402	NA	NA	NA	NA	NA	20.4511	20.0274	NA	NA	NA	NA	NA	NA	NA	NA	NA	NA	NA	NA	NA	20.2023	32.0579	25.1573	NA	21.0353	NA
17OV014-T	Tumor	OV	16.5987	19.5118	1.57944	NA	NA	NA	NA	NA	NA	NA	NA	NA	NA	NA	NA	17.8036	NA	NA	NA	NA	NA	NA	NA	NA	NA	NA	21.1308	20.4135	NA	NA	NA	19.9665	NA	NA	NA	NA	16.8894	NA	NA	NA	NA	20.8671	31.8463	25.6015	NA	21.3217	NA
17OV015-T	Tumor	OV	NA	19.4721	NA	NA	18.3294	NA	NA	21.2067	NA	NA	NA	NA	NA	NA	NA	NA	NA	NA	NA	NA	NA	NA	NA	NA	NA	NA	20.3957	19.445	NA	NA	NA	19.2742	NA	NA	NA	NA	17.5181	NA	NA	NA	NA	20.1354	32.4587	25.0978	NA	NA	18.2846
17OV017-T	Tumor	OV	NA	19.7569	NA	NA	17.8716	NA	NA	20.944	NA	NA	NA	NA	NA	NA	NA	NA	NA	NA	NA	NA	NA	NA	NA	NA	NA	NA	21.362	20.3246	NA	NA	NA	20.0846	NA	NA	NA	NA	17.0553	NA	NA	NA	NA	20.656	31.1014	25.6756	NA	NA	17.9523
17OV018-T	Tumor	OV	NA	19.1497	NA	NA	16.9121	16.8357	NA	21.363	NA	NA	NA	NA	NA	NA	NA	16.5167	NA	NA	NA	NA	NA	NA	NA	NA	20.0775	NA	20.9696	21.332	NA	NA	NA	19.5996	NA	NA	NA	NA	16.9238	NA	NA	NA	NA	20.9676	31.5797	25.5861	NA	21.479	17.87
17OV025-T	Tumor	OV	NA	19.1374	NA	NA	17.0062	16.5339	NA	21.8576	NA	NA	NA	NA	NA	NA	NA	16.7337	NA	NA	NA	NA	NA	NA	NA	NA	20.0877	NA	21.0591	20.5712	NA	NA	NA	20.3807	NA	NA	NA	NA	16.8534	NA	NA	NA	NA	20.2906	31.2943	25.6857	NA	21.2748	17.6364
17OV027-T	Tumor	OV	NA	19.6406	NA	NA	NA	NA	NA	21.7739	NA	NA	NA	NA	NA	NA	NA	NA	NA	NA	NA	NA	17.7266	NA	NA	NA	NA	NA	21.1811	19.8897	NA	NA	NA	NA	NA	NA	NA	NA	17.6316	NA	NA	NA	NA	NA	31.9413	25.4841	NA	21.3556	NA
17OV028-T	Tumor	OV	NA	20.3035	NA	NA	17.2228	NA	NA	21.9861	NA	NA	NA	NA	NA	NA	NA	NA	NA	NA	NA	NA	NA	NA	NA	NA	NA	NA	21.4688	21.3922	NA	NA	NA	20.7143	NA	NA	NA	NA	18.0635	NA	NA	NA	NA	21.2766	30.9238	26.4124	NA	NA	17.6716
17OV029-T	Tumor	OV	NA	19.6406	NA	NA	NA	15.5395	NA	22.2193	NA	NA	NA	NA	NA	NA	NA	NA	NA	NA	NA	NA	17.9815	NA	NA	NA	NA	NA	20.216	20.9446	NA	NA	NA	NA	NA	NA	NA	NA	NA	NA	NA	NA	NA	20.9425	30.8685	26.2635	NA	20.7406	NA
17OV030-T	Tumor	OV	NA	19.1108	NA	NA	NA	16.1547	NA	20.9096	NA	NA	NA	NA	NA	NA	NA	NA	NA	NA	NA	NA	16.8076	NA	NA	NA	NA	NA	20.524	19.8384	NA	NA	NA	NA	NA	NA	NA	NA	NA	NA	NA	NA	NA	20.4307	31.8295	25.245	NA	21.3114	NA
17OV033-T	Tumor	OV	15.8741	19.7987	1.90903	NA	NA	NA	NA	NA	NA	NA	NA	NA	NA	NA	NA	16.887	NA	NA	NA	NA	NA	NA	NA	NA	NA	NA	22.0866	21.1138	NA	NA	NA	20.4789	NA	NA	NA	NA	18.1126	NA	NA	NA	NA	20.1134	31.2178	25.9647	NA	21.0655	NA
17OV036-T	Tumor	OV	NA	19.6386	NA	NA	NA	16.8073	NA	22.0303	NA	NA	NA	NA	16.562	NA	NA	NA	NA	NA	NA	NA	NA	NA	NA	NA	20.0792	NA	21.323	NA	NA	NA	NA	NA	NA	NA	NA	NA	NA	NA	NA	NA	NA	21.0299	31.8645	25.9988	NA	21.0772	NA
17OV039-T	Tumor	OV	NA	20.0691	NA	NA	17.7515	NA	NA	21.5443	NA	NA	NA	NA	NA	NA	NA	NA	NA	NA	NA	NA	NA	NA	NA	NA	NA	NA	21.5787	20.7033	NA	NA	NA	21.1486	NA	NA	NA	NA	16.8378	NA	NA	NA	NA	20.9195	31.7991	25.6057	NA	NA	18.187
17OV040-T	Tumor	OV	16.0489	19.3334	1.43345	NA	NA	NA	NA	NA	NA	NA	NA	NA	NA	NA	NA	16.7204	NA	NA	NA	NA	NA	NA	NA	NA	NA	NA	20.7735	20.0163	NA	NA	NA	20.2038	NA	NA	NA	NA	17.6704	NA	NA	NA	NA	20.6162	32.0607	25.1812	NA	22.3288	NA
18BR002-T	Tumor	BRCA	NA	18.6621	NA	NA	NA	NA	NA	NA	18.9665	NA	NA	NA	NA	NA	NA	18.3578	NA	NA	NA	NA	NA	NA	NA	NA	NA	NA	NA	NA	NA	NA	NA	NA	NA	NA	NA	NA	NA	NA	NA	NA	NA	NA	33.1753	26.2609	NA	NA	22.4142
18BR003-T	Tumor	BRCA	20.5129	18.3103	0.147336	19.3711	17.5615	16.446	NA	20.2582	19.2631	NA	NA	NA	NA	NA	NA	19.7607	NA	NA	NA	NA	18.2287	NA	NA	15.7825	18.999	NA	20.6106	18.5166	NA	NA	NA	NA	NA	NA	NA	NA	16.291	NA	NA	NA	NA	16.9443	31.7893	25.6358	NA	NA	23.1129
18BR004-T	Tumor	BRCA	20.3228	18.768	0.616294	NA	NA	NA	NA	20.2677	NA	NA	NA	NA	NA	NA	NA	NA	NA	NA	NA	NA	NA	NA	NA	NA	NA	NA	20.1818	18.5837	NA	NA	NA	16.0388	NA	NA	NA	NA	NA	NA	NA	NA	NA	NA	30.9691	25.4746	NA	NA	23.852
18BR006-T	Tumor	BRCA	21.1143	18.261	0.0626387	19.5048	17.0132	NA	NA	18.1916	NA	NA	NA	NA	NA	NA	NA	19.6095	NA	NA	NA	NA	NA	NA	NA	NA	18.8738	NA	21.0917	NA	NA	NA	NA	NA	NA	15.0841	NA	NA	NA	NA	NA	NA	NA	16.7191	32.2403	26.3438	17.6291	NA	23.6189
18BR007-T	Tumor	BRCA	19.5999	17.4134	-0.69576	17.9001	NA	NA	NA	NA	NA	NA	NA	NA	NA	NA	NA	17.1971	NA	17.0163	NA	NA	NA	NA	NA	NA	NA	NA	20.9385	18.6164	NA	NA	NA	NA	15.1184	NA	NA	NA	16.1843	NA	NA	NA	NA	16.336	32.353	25.501	NA	NA	22.581
18BR009-T	Tumor	BRCA	19.9055	17.7368	-0.390347	18.5415	16.8224	NA	NA	17.8367	NA	NA	NA	NA	NA	NA	NA	18.3164	NA	NA	NA	NA	NA	NA	NA	NA	19.0012	NA	20.4156	NA	NA	NA	NA	NA	NA	14.2357	NA	NA	NA	NA	NA	NA	NA	16.7248	32.3951	25.7718	17.2753	NA	22.6878
18BR010-T	Tumor	BRCA	19.9474	18.9738	0.844173	17.9109	NA	NA	NA	19.9501	NA	NA	NA	NA	NA	NA	NA	NA	NA	NA	NA	NA	17.6571	NA	NA	NA	NA	NA	20.4373	18.9134	NA	NA	NA	NA	NA	NA	NA	NA	NA	NA	NA	NA	NA	NA	32.5765	25.3294	NA	17.6217	23.3171
18BR016-T	Tumor	BRCA	20.2501	18.8148	0.667338	18.0439	NA	NA	NA	20.2178	NA	NA	NA	NA	NA	NA	NA	19.5046	NA	16.6525	NA	NA	18.1074	NA	NA	NA	NA	NA	20.2503	18.9268	NA	NA	NA	NA	NA	NA	NA	NA	NA	NA	NA	NA	NA	NA	32.4473	25.4953	17.0868	19.7408	22.481
18BR017-T	Tumor	BRCA	20.6776	19.9531	1.78045	18.8239	NA	NA	NA	21.119	NA	NA	NA	NA	NA	NA	NA	NA	NA	NA	NA	NA	19.3506	NA	NA	NA	NA	NA	21.2388	19.233	NA	NA	NA	NA	NA	NA	NA	NA	NA	NA	NA	NA	NA	NA	32.2462	25.9424	NA	18.4015	22.6557
18BR019-T	Tumor	BRCA	20.1001	19.0228	0.884221	NA	NA	NA	NA	20.8115	NA	NA	NA	NA	NA	NA	NA	NA	NA	NA	NA	NA	NA	NA	NA	NA	NA	NA	20.2073	18.5788	NA	NA	NA	16.4937	NA	NA	NA	NA	NA	NA	NA	NA	NA	NA	31.3999	25.4816	NA	NA	21.9363
18OV001-T	Tumor	OV	NA	18.3822	NA	NA	NA	15.0018	NA	20.7414	NA	NA	NA	NA	15.0726	NA	NA	NA	NA	NA	NA	NA	NA	NA	NA	NA	19.1245	NA	20.1874	NA	NA	NA	NA	NA	NA	NA	NA	NA	NA	NA	NA	NA	NA	20.1656	31.914	25.5464	NA	20.8598	NA
20BR001-T	Tumor	BRCA	19.4157	18.805	0.706677	NA	NA	NA	NA	20.3532	NA	NA	NA	NA	NA	NA	NA	NA	NA	NA	NA	NA	NA	NA	NA	NA	NA	NA	20.0964	18.5615	NA	NA	NA	16.2087	NA	NA	NA	NA	NA	NA	NA	NA	NA	NA	30.8729	25.1071	NA	NA	23.7719
20BR002-T	Tumor	BRCA	20.0779	18.2886	0.151325	17.4832	NA	NA	NA	19.1588	NA	NA	NA	NA	NA	NA	NA	16.2025	NA	17.8765	NA	NA	NA	NA	NA	NA	19.6343	NA	20.8471	19.3481	NA	NA	NA	NA	NA	NA	NA	NA	NA	18.3796	NA	NA	15.6675	NA	32.4342	26.6155	NA	NA	23.7277
20BR005-T	Tumor	BRCA	20.4037	19.7519	1.59541	NA	NA	NA	NA	21.3953	NA	NA	NA	NA	NA	NA	NA	NA	NA	NA	NA	NA	NA	NA	NA	NA	NA	NA	20.7936	19.278	NA	NA	NA	17.5407	NA	NA	NA	NA	NA	NA	NA	NA	NA	NA	32.7815	26.2135	NA	NA	21.6953
20BR006-T	Tumor	BRCA	21.9197	19.3782	1.13242	19.6407	17.458	17.3684	NA	21.4802	NA	NA	NA	NA	NA	NA	NA	20.4626	NA	NA	NA	NA	20.1832	NA	NA	NA	19.5453	NA	21.1977	19.393	NA	NA	NA	NA	NA	NA	17.0529	NA	NA	NA	NA	NA	NA	NA	31.5335	26.1917	16.4594	NA	21.8397
20BR007-T	Tumor	BRCA	21.595	19.3447	1.11803	20.4801	NA	NA	NA	19.6364	NA	NA	NA	NA	NA	NA	NA	21.1527	NA	18.0423	NA	NA	NA	NA	NA	NA	19.8495	NA	21.6577	20.0248	NA	NA	NA	NA	NA	NA	NA	NA	NA	17.6994	NA	NA	15.5593	NA	31.967	26.7202	NA	NA	22.0172
20BR008-T	Tumor	BRCA	19.7858	18.0667	-0.0533763	17.9599	NA	NA	NA	19.5389	NA	NA	NA	NA	NA	NA	NA	18.1684	NA	16.6503	NA	NA	NA	NA	NA	NA	18.6808	NA	20.3772	18.038	NA	NA	NA	NA	NA	NA	NA	NA	NA	NA	NA	NA	15.1203	NA	32.6339	25.9327	NA	NA	22.7961
20CO001-N	Normal	COAD	NA	18.8746	NA	NA	NA	NA	NA	20.0201	NA	NA	NA	NA	NA	NA	NA	NA	NA	NA	NA	NA	19.3421	NA	NA	NA	NA	NA	16.8652	19.2712	NA	NA	NA	NA	NA	NA	NA	NA	NA	NA	NA	NA	NA	NA	31.4834	24.3802	NA	NA	NA
20CO001-T	Tumor	COAD	NA	18.9152	NA	NA	NA	NA	NA	20.037	NA	NA	NA	NA	NA	NA	NA	NA	NA	NA	NA	NA	18.5767	NA	NA	NA	NA	NA	17.4855	19.5617	NA	NA	NA	NA	NA	NA	NA	NA	NA	NA	NA	NA	NA	NA	31.6547	24.8728	NA	NA	NA
20CO003-N	Normal	COAD	NA	18.4593	NA	NA	NA	NA	NA	NA	NA	NA	NA	NA	NA	NA	NA	NA	NA	NA	NA	NA	18.7917	NA	NA	NA	NA	NA	17.5272	19.059	NA	NA	NA	NA	NA	NA	NA	NA	NA	NA	NA	NA	NA	NA	31.5356	24.52	NA	NA	NA
20CO003-T	Tumor	COAD	NA	18.3277	NA	NA	NA	NA	NA	20.5849	NA	16.3491	NA	NA	NA	NA	NA	NA	NA	NA	NA	NA	19.2913	NA	NA	NA	NA	NA	18.4578	NA	NA	NA	NA	NA	NA	NA	NA	NA	16.9554	NA	NA	NA	NA	NA	31.2862	25.1241	NA	NA	NA
20CO004-N	Normal	COAD	NA	18.1298	NA	NA	NA	NA	NA	19.859	NA	16.2577	NA	NA	NA	NA	NA	NA	NA	NA	NA	NA	18.8327	NA	NA	NA	NA	NA	NA	17.5699	NA	NA	NA	NA	NA	NA	NA	NA	NA	NA	NA	NA	NA	NA	31.9754	24.2502	NA	NA	NA
20CO004-T	Tumor	COAD	NA	18.946	NA	NA	NA	NA	NA	21.0766	NA	NA	NA	NA	NA	NA	NA	NA	NA	NA	NA	NA	20.6282	NA	NA	NA	14.2431	NA	18.9592	19.8231	NA	NA	NA	NA	NA	NA	NA	NA	NA	NA	NA	NA	NA	NA	30.6349	24.7955	NA	16.7787	NA
20CO006-N	Normal	COAD	NA	19.5816	NA	NA	NA	NA	NA	NA	NA	NA	NA	NA	NA	NA	NA	NA	NA	NA	NA	NA	20.0884	NA	NA	NA	NA	NA	NA	19.0749	NA	NA	NA	NA	NA	NA	NA	NA	NA	NA	NA	NA	NA	NA	31.9277	24.0593	NA	NA	NA
20CO006-T	Tumor	COAD	17.7476	19.3354	1.33535	NA	NA	NA	NA	20.7569	NA	NA	NA	NA	NA	NA	NA	NA	NA	NA	NA	NA	20.5606	NA	NA	NA	NA	NA	18.3001	20.1029	NA	NA	NA	NA	NA	NA	NA	NA	16.9565	NA	NA	NA	NA	NA	30.7526	24.6223	NA	NA	NA
20CO007-N	Normal	COAD	NA	NA	NA	NA	NA	NA	NA	NA	NA	NA	NA	NA	NA	NA	NA	NA	NA	NA	NA	NA	NA	NA	NA	NA	NA	NA	NA	NA	NA	NA	NA	NA	NA	NA	NA	NA	NA	NA	NA	NA	NA	NA	31.5675	24.2246	NA	NA	NA
20CO007-T	Tumor	COAD	NA	19.6018	NA	NA	NA	NA	NA	20.8371	NA	NA	NA	NA	NA	NA	NA	NA	NA	NA	NA	NA	20.2138	NA	NA	NA	NA	NA	17.7546	NA	NA	NA	NA	NA	NA	NA	NA	NA	NA	NA	NA	NA	NA	NA	30.5361	24.9891	NA	NA	NA
20OV005-T	Tumor	OV	NA	19.1504	NA	NA	NA	NA	NA	21.4641	NA	NA	NA	NA	NA	NA	NA	NA	NA	NA	NA	NA	16.7562	NA	NA	NA	NA	NA	20.2319	20.4706	NA	NA	NA	NA	NA	NA	NA	NA	16.8292	NA	NA	NA	NA	NA	31.1695	25.3572	NA	21.1349	NA
21BR001-T	Tumor	BRCA	19.9992	17.9392	-0.193426	18.5588	NA	16.2411	NA	NA	NA	NA	NA	NA	15.4476	NA	NA	17.5035	NA	NA	NA	NA	18.1623	NA	NA	NA	NA	NA	20.8377	18.8236	NA	NA	NA	NA	NA	NA	NA	NA	NA	NA	NA	NA	NA	NA	32.2468	25.9426	NA	NA	23.0114
21BR002-T	Tumor	BRCA	19.9604	17.9283	-0.202061	18.339	NA	16.4808	NA	NA	NA	NA	NA	NA	15.1936	NA	NA	18.0228	NA	NA	NA	NA	18.3619	NA	NA	NA	NA	NA	20.1914	18.9087	NA	NA	NA	NA	NA	NA	NA	NA	NA	NA	NA	NA	NA	NA	32.5587	25.3715	NA	NA	22.8139
21BR010-T	Tumor	BRCA	20.248	18.2271	0.0797419	18.0201	17.9753	16.5499	NA	19.9699	17.6784	NA	NA	NA	NA	NA	NA	17.8491	NA	NA	NA	NA	18.0495	NA	NA	NA	19.1226	NA	20.5057	18.8122	NA	NA	NA	NA	NA	NA	15.9648	NA	NA	NA	NA	NA	NA	NA	32.1171	25.2642	16.5971	NA	22.6628
21CO006-N	Normal	COAD	NA	19.1457	NA	NA	NA	NA	NA	NA	NA	NA	NA	NA	NA	NA	NA	NA	NA	NA	NA	NA	19.2784	NA	NA	NA	NA	NA	NA	19.0129	NA	NA	NA	NA	NA	NA	NA	NA	NA	NA	NA	NA	NA	NA	31.3062	24.4892	NA	NA	NA
21CO006-T	Tumor	COAD	NA	20.133	NA	NA	NA	NA	NA	20.6642	NA	NA	NA	NA	NA	NA	NA	NA	NA	NA	NA	NA	19.6018	NA	NA	NA	NA	NA	NA	NA	NA	NA	NA	NA	NA	NA	NA	NA	NA	NA	NA	NA	NA	NA	31.4299	24.6361	NA	NA	NA
21CO007-N	Normal	COAD	NA	17.9712	NA	NA	NA	NA	NA	20.2024	NA	16.0867	NA	NA	NA	NA	NA	NA	NA	NA	NA	NA	NA	NA	NA	NA	NA	NA	18.2968	NA	NA	NA	NA	NA	NA	NA	NA	NA	17.2989	NA	NA	NA	NA	NA	31.0455	24.2403	NA	NA	NA
21CO007-T	Tumor	COAD	17.1869	19.4774	1.51038	NA	NA	NA	NA	20.9344	NA	NA	NA	NA	NA	NA	NA	NA	NA	NA	NA	NA	21.1149	NA	NA	NA	NA	NA	18.894	19.755	NA	NA	NA	NA	NA	NA	NA	NA	16.6886	NA	NA	NA	NA	NA	30.6826	25.0655	NA	NA	NA
22BR005-T	Tumor	BRCA	20.8058	18.3219	0.141778	19.3011	NA	NA	NA	NA	NA	NA	NA	NA	NA	NA	NA	19.497	NA	17.5182	NA	NA	NA	NA	NA	NA	NA	NA	20.9072	19.7166	NA	NA	NA	NA	15.833	NA	NA	NA	16.5738	NA	NA	NA	NA	17.2287	31.826	25.9709	NA	NA	23.1674
22BR006-T	Tumor	BRCA	19.7986	17.6895	-0.431366	18.417	17.0115	NA	NA	17.2013	NA	NA	NA	NA	NA	NA	NA	18.9931	NA	NA	NA	NA	NA	NA	NA	NA	18.8368	NA	20.3782	NA	NA	NA	NA	NA	NA	13.6178	NA	NA	NA	NA	NA	NA	NA	17.06	31.9542	25.2985	16.9037	NA	22.1394
22CO004-N	Normal	COAD	16.6241	17.7399	-0.193993	NA	NA	NA	NA	19.8427	NA	NA	NA	NA	NA	NA	NA	14.5894	NA	NA	NA	NA	19.7854	NA	NA	NA	NA	NA	18.0109	17.8118	NA	NA	NA	NA	NA	NA	NA	NA	16.3989	NA	NA	NA	NA	NA	31.2239	24.3453	NA	NA	NA
22CO004-T	Tumor	COAD	NA	20.2953	NA	NA	NA	NA	NA	20.3322	NA	NA	NA	NA	NA	NA	NA	NA	NA	NA	NA	NA	20.2584	NA	NA	NA	NA	NA	NA	NA	NA	NA	NA	NA	NA	NA	NA	NA	NA	NA	NA	NA	NA	NA	30.4648	24.584	NA	NA	NA
22CO006-N	Normal	COAD	NA	19.4557	NA	NA	NA	NA	NA	NA	NA	NA	NA	NA	NA	NA	NA	NA	NA	NA	NA	NA	19.4557	NA	NA	NA	NA	NA	NA	NA	NA	NA	NA	NA	NA	NA	NA	NA	NA	NA	NA	NA	NA	NA	31.9127	24.0295	NA	NA	NA
22CO006-T	Tumor	COAD	16.2116	19.2517	1.34216	NA	NA	NA	NA	20.7848	NA	NA	NA	NA	NA	NA	NA	NA	NA	NA	NA	NA	20.0602	NA	NA	NA	NA	NA	18.3351	19.9739	NA	NA	NA	NA	NA	NA	NA	NA	17.1046	NA	NA	NA	NA	NA	31.4867	24.749	NA	NA	NA
26OV002-T	Tumor	OV	16.2041	19.6397	1.73056	NA	NA	NA	NA	NA	NA	NA	NA	NA	NA	NA	NA	NA	NA	NA	NA	NA	NA	NA	NA	NA	20.4211	NA	21.0041	NA	NA	NA	NA	20.6734	NA	NA	NA	NA	16.4818	NA	NA	NA	NA	19.618	31.7277	25.6155	NA	21.3716	NA
26OV008-T	Tumor	OV	NA	19.5139	NA	NA	NA	NA	NA	21.5676	NA	NA	NA	NA	NA	NA	NA	NA	NA	NA	NA	NA	17.0785	NA	NA	NA	NA	NA	20.645	21.1158	NA	NA	NA	NA	NA	NA	NA	NA	17.1628	NA	NA	NA	NA	NA	31.7265	25.9451	NA	20.6873	NA
26OV009-T	Tumor	OV	NA	19.5405	NA	NA	NA	NA	NA	21.8728	NA	NA	NA	NA	NA	NA	NA	NA	NA	NA	NA	NA	15.8158	NA	NA	NA	NA	NA	21.1878	21.2759	NA	NA	NA	NA	NA	NA	NA	NA	17.5504	NA	NA	NA	NA	NA	31.0098	26.7431	NA	21.1058	NA
26OV011-T	Tumor	OV	NA	19.4222	NA	NA	16.9451	NA	NA	20.7498	NA	NA	NA	NA	NA	NA	NA	NA	NA	14.732	NA	NA	NA	NA	NA	19.0141	20.8723	NA	21.4281	21.2907	NA	NA	NA	20.509	NA	NA	NA	NA	17.9618	NA	NA	NA	NA	20.7187	32.0993	25.7096	NA	20.5231	18.3529
26OV013-T	Tumor	OV	NA	19.2605	NA	NA	NA	16.8512	NA	21.5368	NA	NA	NA	NA	15.433	NA	NA	NA	NA	NA	NA	NA	NA	NA	NA	NA	19.7369	NA	21.4772	NA	NA	NA	NA	NA	NA	NA	NA	NA	NA	NA	NA	NA	NA	20.5279	31.6022	25.3065	NA	21.597	NA
27CO004-N	Normal	COAD	17.3199	18.3169	0.342104	NA	NA	NA	NA	NA	NA	NA	NA	NA	NA	NA	NA	NA	NA	NA	NA	NA	19.4915	NA	NA	NA	NA	NA	18.5292	NA	NA	NA	NA	NA	NA	NA	NA	NA	16.9301	NA	NA	NA	NA	NA	31.3706	24.6134	NA	NA	NA
27CO004-T	Tumor	COAD	NA	19.1707	NA	NA	NA	NA	NA	NA	NA	NA	NA	NA	NA	NA	NA	NA	NA	NA	NA	NA	20.1448	NA	NA	NA	NA	NA	18.0245	19.3427	NA	NA	NA	NA	NA	NA	NA	NA	NA	NA	NA	NA	NA	NA	31.5319	24.6909	NA	NA	NA
C3L-00001-N	Normal	LUAD	NA	16.794	NA	NA	NA	NA	NA	NA	NA	NA	NA	NA	NA	NA	NA	17.6197	NA	15.1905	NA	NA	17.384	NA	NA	NA	17.4605	NA	18.5539	17.4456	NA	NA	NA	NA	NA	NA	NA	NA	NA	NA	NA	NA	NA	13.9038	32.3639	24.5301	NA	NA	20.1548
C3L-00001-T	Tumor	LUAD	NA	17.5116	NA	NA	NA	NA	NA	NA	NA	NA	NA	NA	NA	NA	NA	18.7828	NA	16.2397	NA	NA	18.988	NA	NA	NA	17.8514	NA	19.2842	18.2965	NA	NA	NA	NA	NA	NA	NA	NA	NA	NA	NA	NA	NA	13.1386	32.0598	24.3258	NA	NA	20.1735
C3L-00004-N	Normal	CCRCC	NA	NA	NA	NA	NA	NA	NA	NA	NA	NA	NA	NA	NA	NA	NA	NA	NA	NA	NA	NA	NA	NA	NA	NA	NA	NA	NA	NA	NA	NA	NA	NA	NA	NA	NA	NA	NA	NA	NA	NA	NA	NA	30.5751	22.953	NA	NA	20.689
C3L-00004-T	Tumor	CCRCC	NA	NA	NA	NA	NA	NA	NA	NA	NA	NA	NA	NA	NA	NA	NA	NA	NA	NA	NA	NA	NA	NA	NA	NA	NA	NA	NA	NA	NA	NA	NA	NA	NA	NA	NA	NA	NA	NA	NA	NA	NA	NA	31.6733	23.9706	NA	NA	21.638
C3L-00006-N	Normal	UCEC	NA	18.5153	NA	NA	NA	NA	NA	21.9535	NA	NA	NA	16.9493	NA	NA	NA	NA	NA	18.8338	NA	NA	NA	NA	NA	NA	NA	NA	18.0155	16.8242	NA	NA	NA	NA	NA	NA	NA	NA	NA	NA	NA	NA	NA	NA	32.9855	24.9537	NA	20.5632	20.6173
C3L-00006-T	Tumor	UCEC	NA	18.8706	NA	NA	NA	NA	NA	22.1056	NA	NA	NA	16.7593	NA	NA	NA	NA	NA	18.8313	NA	NA	NA	NA	NA	NA	NA	NA	18.3204	18.3366	NA	NA	NA	NA	NA	NA	NA	NA	NA	NA	NA	NA	NA	NA	32.2267	26.1827	NA	20.9255	20.4811
C3L-00008-T	Tumor	UCEC	NA	18.6592	NA	NA	NA	18.2245	NA	22.5834	NA	NA	NA	17.1783	NA	NA	NA	19.5125	15.7607	19.0265	NA	NA	NA	NA	NA	NA	NA	NA	20.0863	20.8783	NA	17.8879	NA	16.1934	NA	NA	NA	NA	18.1547	NA	18.4239	NA	NA	NA	31.5211	26.3976	NA	21.9301	23.2839
C3L-00009-N	Normal	LUAD	23.1661	16.5956	-1.72361	NA	NA	NA	NA	NA	NA	NA	NA	NA	NA	NA	NA	16.9511	NA	NA	NA	NA	17.7963	NA	NA	NA	NA	NA	18.723	NA	NA	NA	NA	NA	NA	NA	NA	NA	NA	12.912	NA	NA	NA	NA	32.5773	24.4405	NA	NA	19.6342
C3L-00009-T	Tumor	LUAD	21.757	17.8116	-0.424561	NA	NA	NA	NA	NA	NA	NA	NA	NA	NA	NA	NA	19.958	NA	NA	NA	NA	19.1507	NA	NA	NA	NA	NA	19.292	NA	NA	NA	NA	NA	NA	NA	NA	NA	NA	12.8458	NA	NA	NA	NA	32.0302	25.0473	NA	NA	19.4647
C3L-00010-N	Normal	CCRCC	NA	NA	NA	NA	NA	NA	NA	NA	NA	NA	NA	NA	NA	NA	NA	NA	NA	NA	NA	NA	NA	NA	NA	NA	NA	NA	NA	NA	NA	NA	NA	NA	NA	NA	NA	NA	NA	NA	NA	NA	NA	NA	30.3675	23.0055	NA	NA	20.7326
C3L-00010-T	Tumor	CCRCC	NA	NA	NA	NA	NA	NA	NA	NA	NA	NA	NA	NA	NA	NA	NA	NA	NA	NA	NA	NA	NA	NA	NA	NA	NA	NA	NA	NA	NA	NA	NA	NA	NA	NA	NA	NA	NA	NA	NA	NA	NA	NA	31.3433	24.8283	NA	NA	21.9746
C3L-00011-N	Normal	CCRCC	NA	12.4086	NA	NA	NA	NA	NA	NA	NA	NA	NA	NA	NA	NA	NA	NA	NA	NA	NA	NA	NA	NA	NA	NA	NA	NA	NA	NA	NA	NA	NA	NA	12.4086	NA	NA	NA	NA	NA	NA	NA	NA	NA	30.0883	22.9815	NA	NA	20.5359
C3L-00011-T	Tumor	CCRCC	NA	15.2974	NA	NA	NA	NA	NA	NA	NA	NA	NA	NA	NA	NA	NA	NA	NA	NA	NA	NA	NA	NA	NA	NA	NA	NA	NA	NA	NA	NA	NA	NA	15.2974	NA	NA	NA	NA	NA	NA	NA	NA	NA	33.0632	25.9585	NA	NA	21.9671
C3L-00017-T	Tumor	PDA	NA	17.7835	NA	NA	NA	NA	NA	18.4757	NA	NA	NA	NA	NA	NA	NA	17.182	NA	NA	NA	NA	17.6926	NA	NA	NA	NA	NA	NA	NA	NA	NA	NA	NA	NA	NA	NA	NA	NA	NA	NA	NA	NA	NA	32.1537	23.9505	NA	NA	NA
C3L-00026-N	Normal	CCRCC	19.0031	15.0304	-3.04355	NA	NA	NA	NA	NA	NA	NA	NA	NA	NA	NA	NA	14.0514	NA	NA	NA	NA	NA	NA	NA	NA	NA	NA	17.6086	16.0844	NA	NA	NA	NA	13.9794	NA	NA	NA	13.4283	NA	NA	NA	NA	NA	30.5862	23.9812	NA	NA	20.651
C3L-00026-T	Tumor	CCRCC	18.1295	15.0263	-2.9962	NA	NA	NA	NA	NA	NA	NA	NA	NA	NA	NA	NA	14.5999	NA	NA	NA	NA	NA	NA	NA	NA	NA	NA	17.4462	15.7469	NA	NA	NA	NA	14.0187	NA	NA	NA	13.32	NA	NA	NA	NA	NA	31.5217	24.3522	NA	NA	22.2992
C3L-00032-T	Tumor	UCEC	19.1899	19.7939	1.70888	NA	NA	17.5951	NA	22.1976	NA	NA	NA	NA	NA	NA	NA	NA	NA	NA	NA	NA	20.7784	NA	NA	NA	NA	NA	NA	21.0864	NA	NA	NA	NA	NA	NA	NA	NA	NA	NA	17.3118	NA	NA	NA	31.5223	25.3813	NA	NA	NA
C3L-00079-N	Normal	CCRCC	NA	13.9544	NA	NA	NA	NA	NA	NA	NA	NA	NA	NA	NA	NA	NA	13.9544	NA	NA	NA	NA	NA	NA	NA	NA	NA	NA	NA	NA	NA	NA	NA	NA	NA	NA	NA	NA	NA	NA	NA	NA	NA	NA	31.1525	23.3246	NA	NA	20.1847
C3L-00079-T	Tumor	CCRCC	NA	15.6945	NA	NA	NA	NA	NA	NA	NA	NA	NA	NA	NA	NA	NA	15.6945	NA	NA	NA	NA	NA	NA	NA	NA	NA	NA	NA	NA	NA	NA	NA	NA	NA	NA	NA	NA	NA	NA	NA	NA	NA	NA	32.2052	24.7997	NA	NA	21.7985
C3L-00080-N	Normal	LUAD	22.4467	15.7981	-2.47868	15.1847	NA	NA	NA	NA	NA	NA	NA	NA	NA	NA	NA	NA	NA	NA	NA	NA	NA	NA	NA	NA	NA	NA	18.9904	15.7805	NA	NA	NA	NA	NA	NA	NA	NA	NA	NA	NA	NA	NA	13.237	32.7717	24.551	NA	NA	20.0691
C3L-00080-T	Tumor	LUAD	22.4337	17.2008	-1.07522	17.253	NA	NA	NA	NA	NA	NA	NA	NA	NA	NA	NA	NA	NA	NA	NA	NA	NA	NA	NA	NA	NA	NA	19.643	17.7611	NA	NA	NA	NA	NA	NA	NA	NA	NA	NA	NA	NA	NA	14.1463	31.5359	26.3211	NA	NA	20.3983
C3L-00081-N	Normal	LSCC	20.34	18.2035	0.0507193	NA	NA	16.2967	NA	18.9856	NA	NA	NA	NA	NA	NA	NA	NA	NA	18.7459	NA	NA	NA	NA	NA	NA	17.9751	NA	NA	18.9325	NA	NA	NA	18.285	NA	NA	NA	NA	NA	NA	NA	NA	NA	NA	32.5714	24.8196	NA	NA	20.243
C3L-00081-T	Tumor	LSCC	21.9518	19.3716	1.1239	NA	NA	16.4537	NA	21.5631	NA	NA	NA	NA	NA	NA	NA	21.3902	NA	19.9151	NA	NA	NA	NA	NA	NA	18.8085	NA	NA	19.4444	NA	NA	NA	18.026	NA	NA	NA	NA	NA	NA	NA	NA	NA	NA	31.198	26.697	NA	NA	20.1181
C3L-00083-N	Normal	LUAD	21.5873	15.0673	-3.15894	NA	NA	NA	NA	NA	NA	NA	NA	NA	NA	NA	NA	15.5233	NA	NA	NA	NA	17.7455	NA	NA	NA	NA	NA	NA	NA	NA	NA	NA	NA	NA	NA	NA	NA	11.933	NA	NA	NA	NA	NA	32.0721	24.6095	NA	NA	20.1822
C3L-00083-T	Tumor	LUAD	22.5215	16.3174	-1.96381	NA	NA	NA	NA	NA	NA	NA	NA	NA	NA	NA	NA	18.6644	NA	NA	NA	NA	17.9335	NA	NA	NA	NA	NA	NA	NA	NA	NA	NA	NA	NA	NA	NA	NA	12.3543	NA	NA	NA	NA	NA	32.2555	24.8405	NA	NA	19.7621
C3L-00088-N	Normal	CCRCC	17.4524	NA	NA	NA	NA	NA	NA	NA	NA	NA	NA	NA	NA	NA	NA	NA	NA	NA	NA	NA	NA	NA	NA	NA	NA	NA	NA	NA	NA	NA	NA	NA	NA	NA	NA	NA	NA	NA	NA	NA	NA	NA	30.8055	22.8348	NA	NA	21.0392
C3L-00088-T	Tumor	CCRCC	18.2164	NA	NA	NA	NA	NA	NA	NA	NA	NA	NA	NA	NA	NA	NA	NA	NA	NA	NA	NA	NA	NA	NA	NA	NA	NA	NA	NA	NA	NA	NA	NA	NA	NA	NA	NA	NA	NA	NA	NA	NA	NA	31.469	23.6284	NA	NA	22.5691
C3L-00090-T	Tumor	UCEC	19.5595	18.3624	0.255648	NA	NA	NA	NA	21.5789	NA	NA	NA	NA	NA	NA	NA	17.9598	14.5626	18.2177	NA	NA	19.6179	NA	NA	NA	NA	NA	19.4641	19.7542	NA	NA	NA	18.431	NA	NA	NA	NA	17.0832	NA	16.9547	NA	NA	NA	32.9367	25.0963	NA	20.8	20.37
C3L-00093-N	Normal	LUAD	20.6173	17.0846	-1.08442	NA	NA	NA	NA	16.9807	NA	NA	NA	NA	NA	NA	NA	16.2537	NA	15.641	NA	NA	18.0583	NA	NA	NA	17.6945	NA	19.2632	18.3182	NA	NA	NA	NA	NA	NA	NA	NA	NA	NA	14.4674	NA	NA	NA	32.2146	24.6624	NA	16.0451	20.2619
C3L-00093-T	Tumor	LUAD	21.9984	17.8557	-0.394733	NA	NA	NA	NA	18.1965	NA	NA	NA	NA	NA	NA	NA	19.6211	NA	16.0648	NA	NA	18.8751	NA	NA	NA	18.0491	NA	19.1894	18.5198	NA	NA	NA	NA	NA	NA	NA	NA	NA	NA	14.3296	NA	NA	NA	31.9588	25.2405	NA	17.2211	20.2591
C3L-00094-N	Normal	LUAD	20.9056	17.5083	-0.677769	NA	NA	NA	NA	16.9759	NA	NA	NA	NA	NA	NA	NA	NA	NA	NA	NA	NA	17.424	NA	NA	NA	17.6255	NA	NA	18.0078	NA	NA	NA	NA	NA	NA	NA	NA	NA	NA	NA	NA	NA	NA	32.1503	24.6708	NA	NA	20.5093
C3L-00094-T	Tumor	LUAD	22.5873	19.4128	1.12771	NA	NA	NA	NA	19.1096	NA	NA	NA	NA	NA	NA	NA	NA	NA	NA	NA	NA	20.7855	NA	NA	NA	18.8777	NA	NA	18.8784	NA	NA	NA	NA	NA	NA	NA	NA	NA	NA	NA	NA	NA	NA	31.3969	25.5104	NA	NA	20.5418
C3L-00095-N	Normal	LUAD	21.3093	17.7771	-0.432731	NA	NA	NA	NA	NA	NA	NA	NA	NA	NA	NA	NA	NA	NA	NA	NA	NA	NA	NA	NA	NA	17.0552	NA	18.499	NA	NA	NA	NA	NA	NA	NA	NA	NA	NA	NA	NA	NA	NA	NA	32.0216	24.5365	NA	16.0799	20.9864
C3L-00095-T	Tumor	LUAD	21.8828	18.6496	0.405989	NA	NA	NA	NA	NA	NA	NA	NA	NA	NA	NA	NA	NA	NA	NA	NA	NA	18.5766	NA	NA	NA	17.5826	NA	19.7896	NA	NA	NA	NA	NA	NA	NA	NA	NA	NA	NA	NA	NA	NA	NA	32.0196	24.8636	NA	16.634	19.8973
C3L-00096-N	Normal	CCRCC	NA	NA	NA	NA	NA	NA	NA	NA	NA	NA	NA	NA	NA	NA	NA	NA	NA	NA	NA	NA	NA	NA	NA	NA	NA	NA	NA	NA	NA	NA	NA	NA	NA	NA	NA	NA	NA	NA	NA	NA	NA	NA	30.5784	23.1094	NA	NA	20.5692
C3L-00096-T	Tumor	CCRCC	NA	NA	NA	NA	NA	NA	NA	NA	NA	NA	NA	NA	NA	NA	NA	NA	NA	NA	NA	NA	NA	NA	NA	NA	NA	NA	NA	NA	NA	NA	NA	NA	NA	NA	NA	NA	NA	NA	NA	NA	NA	NA	32.2567	23.762	NA	NA	23.0728
C3L-00097-N	Normal	CCRCC	NA	NA	NA	NA	NA	NA	NA	NA	NA	NA	NA	NA	NA	NA	NA	NA	NA	NA	NA	NA	NA	NA	NA	NA	NA	NA	NA	NA	NA	NA	NA	NA	NA	NA	NA	NA	NA	NA	NA	NA	NA	NA	30.0796	22.6082	NA	NA	20.789
C3L-00097-T	Tumor	CCRCC	NA	NA	NA	NA	NA	NA	NA	NA	NA	NA	NA	NA	NA	NA	NA	NA	NA	NA	NA	NA	NA	NA	NA	NA	NA	NA	NA	NA	NA	NA	NA	NA	NA	NA	NA	NA	NA	NA	NA	NA	NA	NA	31.9516	24.3121	NA	NA	21.1697
C3L-00098-T	Tumor	UCEC	20.6239	17.5927	-0.576781	NA	13.6962	17.7268	NA	22.4395	NA	NA	NA	17.4885	18.4583	NA	NA	19.3551	15.0924	18.811	NA	NA	NA	NA	NA	NA	NA	12.6687	20.2491	20.5285	NA	17.6511	NA	14.5539	NA	NA	NA	NA	NA	NA	17.5782	NA	NA	NA	30.7216	26.787	NA	21.2982	18.8898
C3L-00102-N	Normal	PDA	NA	18.3994	NA	NA	NA	NA	NA	18.7421	NA	NA	NA	NA	NA	NA	NA	17.885	NA	NA	NA	NA	NA	NA	NA	NA	NA	NA	18.5712	NA	NA	NA	NA	NA	NA	NA	NA	NA	NA	NA	NA	NA	NA	NA	31.1162	24.6165	NA	NA	NA
C3L-00102-T	Tumor	PDA	NA	18.1949	NA	NA	NA	NA	NA	18.3902	NA	NA	NA	NA	NA	NA	NA	17.3869	NA	NA	NA	NA	NA	NA	NA	NA	NA	NA	18.8074	NA	NA	NA	NA	NA	NA	NA	NA	NA	NA	NA	NA	NA	NA	NA	32.0858	24.0105	NA	NA	NA
C3L-00103-N	Normal	CCRCC	18.0041	15.6307	-2.38443	NA	NA	NA	NA	NA	14.1422	NA	NA	NA	NA	NA	NA	NA	NA	NA	NA	NA	NA	NA	NA	NA	NA	NA	17.1415	17.0208	NA	NA	NA	14.2183	NA	NA	NA	NA	NA	NA	NA	NA	NA	NA	30.9649	23.2436	NA	NA	20.7202
C3L-00103-T	Tumor	CCRCC	18.8775	16.5857	-1.4809	NA	NA	NA	NA	NA	14.277	NA	NA	NA	NA	NA	NA	NA	NA	NA	NA	NA	NA	NA	NA	NA	NA	NA	18.2577	17.9363	NA	NA	NA	15.8718	NA	NA	NA	NA	NA	NA	NA	NA	NA	NA	31.7102	24.7614	NA	NA	21.2695
C3L-00104-T	Tumor	GBM	NA	19.1396	NA	NA	NA	NA	NA	NA	NA	NA	NA	NA	NA	NA	NA	19.5658	NA	NA	NA	NA	19.5026	NA	NA	NA	NA	NA	19.2342	18.2559	NA	NA	NA	NA	NA	NA	NA	NA	NA	NA	NA	NA	NA	NA	32.7278	26.0245	NA	NA	NA
C3L-00136-T	Tumor	UCEC	NA	17.6306	NA	NA	NA	17.4946	NA	21.3171	NA	NA	NA	16.803	NA	NA	NA	18.0837	14.6145	18.1674	NA	NA	NA	NA	NA	NA	NA	NA	19.0641	19.4954	NA	16.2627	NA	15.9515	NA	NA	NA	NA	16.5134	NA	17.8	NA	NA	NA	31.8499	24.9975	NA	20.3578	20.8115
C3L-00137-T	Tumor	UCEC	NA	18.3948	NA	14.1682	NA	NA	NA	NA	NA	NA	NA	NA	NA	NA	NA	NA	NA	NA	NA	NA	20.163	NA	NA	NA	NA	NA	21.8903	20.7164	16.0731	NA	NA	NA	NA	NA	NA	NA	17.3575	NA	NA	NA	NA	NA	32.8365	26.3183	NA	20.8889	NA
C3L-00139-T	Tumor	UCEC	NA	19.6969	NA	NA	NA	NA	NA	22.9131	NA	NA	16.5219	NA	19.3491	NA	NA	NA	NA	19.5459	NA	NA	NA	NA	17.4574	NA	NA	NA	21.9803	21.3631	NA	NA	NA	19.2123	NA	NA	NA	NA	NA	NA	18.9288	NA	NA	NA	31.0332	26.8803	NA	21.692	NA
C3L-00140-N	Normal	LUAD	22.508	17.2955	-0.984883	NA	NA	NA	NA	NA	NA	NA	NA	NA	NA	NA	NA	NA	NA	NA	NA	NA	17.2955	NA	NA	NA	NA	NA	NA	NA	NA	NA	NA	NA	NA	NA	NA	NA	NA	NA	NA	NA	NA	NA	32.2411	24.3006	NA	NA	20.3765
C3L-00140-T	Tumor	LUAD	21.3042	17.903	-0.306546	NA	NA	NA	NA	NA	NA	NA	NA	NA	NA	NA	NA	NA	NA	NA	NA	NA	17.903	NA	NA	NA	NA	NA	NA	NA	NA	NA	NA	NA	NA	NA	NA	NA	NA	NA	NA	NA	NA	NA	31.3426	24.1149	NA	NA	20.0561
C3L-00143-T	Tumor	UCEC	18.4635	16.7004	-1.34178	NA	13.4328	17.4425	NA	21.6967	NA	NA	NA	16.6372	17.3978	NA	NA	18.0604	14.9315	18.2954	NA	NA	NA	NA	NA	NA	NA	11.695	19.3272	19.511	NA	16.3881	NA	11.9102	NA	NA	NA	NA	NA	NA	17.0801	NA	NA	NA	31.3489	24.6338	NA	20.1186	20.3313
C3L-00144-N	Normal	LUAD	21.3455	17.5216	-0.690313	NA	NA	NA	NA	16.9102	NA	NA	NA	NA	NA	NA	NA	NA	NA	NA	NA	NA	17.4615	NA	NA	NA	17.6129	NA	NA	18.102	NA	NA	NA	NA	NA	NA	NA	NA	NA	NA	NA	NA	NA	NA	32.2813	24.6524	NA	NA	20.1789
C3L-00144-T	Tumor	LUAD	23.1481	19.3889	1.07077	NA	NA	NA	NA	19.5576	NA	NA	NA	NA	NA	NA	NA	NA	NA	NA	NA	NA	19.5316	NA	NA	NA	19.1711	NA	NA	19.2953	NA	NA	NA	NA	NA	NA	NA	NA	NA	NA	NA	NA	NA	NA	31.6771	25.925	NA	NA	19.8264
C3L-00145-T	Tumor	UCEC	19.3818	19.2051	1.10879	NA	NA	18.0798	NA	21.8035	NA	NA	NA	NA	17.8334	NA	NA	NA	NA	18.8244	NA	NA	19.6132	NA	NA	NA	NA	NA	20.9559	NA	NA	NA	NA	NA	NA	NA	NA	NA	NA	NA	17.3254	NA	NA	NA	32.4344	25.5811	NA	20.2615	19.832
C3L-00156-T	Tumor	UCEC	NA	18.0984	NA	14.2135	NA	NA	NA	NA	NA	NA	NA	NA	NA	NA	NA	NA	NA	NA	NA	NA	19.4443	NA	NA	NA	NA	NA	21.3703	20.1609	15.9206	NA	NA	NA	NA	NA	NA	NA	17.4812	NA	NA	NA	NA	NA	31.7227	25.4059	NA	21.3126	NA
C3L-00157-T	Tumor	UCEC	NA	18.7198	NA	NA	NA	18.2718	NA	22.9431	NA	NA	17.1177	NA	19.1526	NA	NA	NA	NA	19.2312	14.3125	NA	NA	NA	NA	NA	NA	NA	22.3798	20.961	NA	NA	NA	19.1079	NA	NA	NA	14.2896	18.1502	NA	NA	NA	NA	NA	31.2573	25.5651	NA	21.716	20.3728
C3L-00161-T	Tumor	UCEC	NA	18.1296	NA	NA	NA	17.6212	NA	22.3817	NA	NA	16.2776	NA	18.6031	NA	NA	NA	NA	19.2709	13.2739	NA	NA	NA	NA	NA	NA	NA	21.4491	20.2516	NA	NA	NA	19.1505	NA	NA	NA	14.1275	17.0183	NA	NA	NA	NA	NA	31.7794	26.0169	NA	21.2232	24.0047
C3L-00183-N	Normal	CCRCC	NA	NA	NA	NA	NA	NA	NA	NA	NA	NA	NA	NA	NA	NA	NA	NA	NA	NA	NA	NA	NA	NA	NA	NA	NA	NA	NA	NA	NA	NA	NA	NA	NA	NA	NA	NA	NA	NA	NA	NA	NA	NA	30.5564	23.2171	NA	NA	20.0939
C3L-00183-T	Tumor	CCRCC	NA	NA	NA	NA	NA	NA	NA	NA	NA	NA	NA	NA	NA	NA	NA	NA	NA	NA	NA	NA	NA	NA	NA	NA	NA	NA	NA	NA	NA	NA	NA	NA	NA	NA	NA	NA	NA	NA	NA	NA	NA	NA	31.722	24.5048	NA	NA	22.0746
C3L-00189-N	Normal	PDA	18.1608	16.6659	-1.35849	NA	NA	NA	NA	NA	NA	NA	NA	NA	NA	NA	NA	16.6659	NA	NA	NA	NA	NA	NA	NA	NA	NA	NA	NA	NA	NA	NA	NA	NA	NA	NA	NA	NA	NA	NA	NA	NA	NA	NA	30.8515	23.6244	NA	NA	17.1196
C3L-00189-T	Tumor	PDA	19.8561	16.9948	-1.12942	NA	NA	NA	NA	NA	NA	NA	NA	NA	NA	NA	NA	16.9948	NA	NA	NA	NA	NA	NA	NA	NA	NA	NA	NA	NA	NA	NA	NA	NA	NA	NA	NA	NA	NA	NA	NA	NA	NA	NA	32.7315	24.1164	NA	NA	18.2385
C3L-00263-N	Normal	LUAD	20.5197	17.2879	-0.875408	NA	NA	NA	NA	NA	NA	NA	NA	NA	NA	NA	NA	NA	NA	NA	NA	NA	17.2879	NA	NA	NA	NA	NA	NA	NA	NA	NA	NA	NA	NA	NA	NA	NA	NA	NA	NA	NA	NA	NA	32.4738	24.5964	NA	NA	20.35
C3L-00263-T	Tumor	LUAD	21.0777	17.651	-0.545167	NA	NA	NA	NA	NA	NA	NA	NA	NA	NA	NA	NA	NA	NA	NA	NA	NA	17.651	NA	NA	NA	NA	NA	NA	NA	NA	NA	NA	NA	NA	NA	NA	NA	NA	NA	NA	NA	NA	NA	32.1463	24.8747	NA	NA	19.1731
C3L-00277-N	Normal	PDA	NA	17.8442	NA	NA	NA	NA	NA	NA	NA	NA	NA	NA	NA	NA	NA	17.0183	NA	NA	NA	NA	NA	NA	NA	NA	NA	NA	18.67	NA	NA	NA	NA	NA	NA	NA	NA	NA	NA	NA	NA	NA	NA	NA	31.0277	23.8114	NA	NA	19.3951
C3L-00277-T	Tumor	PDA	NA	18.1195	NA	NA	NA	NA	NA	NA	NA	NA	NA	NA	NA	NA	NA	16.8346	NA	NA	NA	NA	NA	NA	NA	NA	NA	NA	19.4044	NA	NA	NA	NA	NA	NA	NA	NA	NA	NA	NA	NA	NA	NA	NA	32.7564	24.0543	NA	NA	17.7867
C3L-00279-N	Normal	LUAD	21.694	16.5572	-1.67531	15.0822	NA	NA	NA	NA	NA	NA	NA	NA	NA	NA	NA	NA	NA	16.1707	NA	NA	17.335	NA	NA	NA	17.6408	NA	NA	NA	NA	NA	NA	NA	NA	NA	NA	NA	NA	NA	NA	NA	NA	NA	32.0268	24.77	NA	NA	20.3291
C3L-00279-T	Tumor	LUAD	21.9593	17.402	-0.846113	16.2008	NA	NA	NA	NA	NA	NA	NA	NA	NA	NA	NA	18.3437	NA	16.285	NA	NA	18.3613	NA	NA	NA	17.8192	NA	NA	NA	NA	NA	NA	NA	NA	NA	NA	NA	NA	NA	NA	NA	NA	NA	32.1669	25.1158	NA	NA	20.1349
C3L-00356-T	Tumor	UCEC	NA	18.6124	NA	NA	NA	NA	NA	21.6835	NA	NA	15.7473	NA	18.13	NA	NA	NA	NA	18.8257	NA	NA	NA	NA	15.777	NA	NA	NA	20.7255	20.3679	NA	NA	NA	18.586	NA	NA	NA	NA	NA	NA	17.6684	NA	NA	NA	31.1996	27.148	NA	21.93	NA
C3L-00358-T	Tumor	UCEC	20.1951	19.1987	1.0545	NA	NA	18.135	NA	23.3109	NA	NA	NA	NA	18.893	NA	NA	19.117	NA	19.8444	NA	NA	NA	NA	NA	NA	16.4406	NA	20.8719	22.1716	NA	NA	NA	NA	NA	NA	NA	NA	NA	NA	18.9525	NA	NA	14.25	31.0237	26.3757	NA	21.9344	19.0835
C3L-00359-T	Tumor	CCRCC	NA	NA	NA	NA	NA	NA	NA	NA	NA	NA	NA	NA	NA	NA	NA	NA	NA	NA	NA	NA	NA	NA	NA	NA	NA	NA	NA	NA	NA	NA	NA	NA	NA	NA	NA	NA	NA	NA	NA	NA	NA	NA	31.5939	23.3655	NA	NA	21.3412
C3L-00360-N	Normal	CCRCC	18.0728	15.2557	-2.76351	13.2974	NA	NA	NA	NA	NA	NA	NA	NA	NA	NA	NA	13.3881	NA	NA	NA	NA	15.2328	NA	NA	NA	NA	NA	17.5416	17.8974	NA	NA	NA	14.1766	NA	NA	NA	NA	NA	NA	NA	NA	NA	NA	30.7941	23.4467	NA	NA	21.2032
C3L-00360-T	Tumor	CCRCC	18.9472	15.5359	-2.53474	13.8396	NA	NA	NA	NA	NA	NA	NA	NA	NA	NA	NA	14.0289	NA	NA	NA	NA	15.7719	NA	NA	NA	NA	NA	17.9179	16.8742	NA	NA	NA	14.7833	NA	NA	NA	NA	NA	NA	NA	NA	NA	NA	32.0226	23.9316	NA	NA	21.8677
C3L-00361-N	Normal	UCEC	17.2548	18.8256	0.854598	NA	NA	17.9933	NA	20.5261	NA	NA	NA	NA	NA	NA	NA	NA	NA	NA	NA	NA	17.8924	NA	NA	NA	NA	NA	NA	21.1696	NA	NA	NA	NA	NA	NA	NA	NA	NA	NA	16.5466	NA	NA	NA	33.1251	24.7852	NA	NA	NA
C3L-00361-T	Tumor	UCEC	20.366	20.1581	2.00388	NA	NA	17.8926	NA	22.9407	NA	NA	NA	NA	NA	NA	NA	NA	NA	NA	NA	NA	19.1901	NA	NA	NA	NA	NA	NA	21.7298	NA	NA	NA	NA	NA	NA	NA	NA	NA	NA	19.0375	NA	NA	NA	30.7567	26.0915	NA	NA	NA
C3L-00362-T	Tumor	UCEC	NA	18.6229	NA	NA	NA	NA	NA	21.7	NA	NA	NA	17.031	NA	NA	NA	NA	NA	18.7351	NA	NA	NA	NA	NA	NA	NA	NA	17.9446	17.7035	NA	NA	NA	NA	NA	NA	NA	NA	NA	NA	NA	NA	NA	NA	31.5994	25.9634	NA	20.5964	21.2287
C3L-00365-T	Tumor	GBM	NA	18.3005	NA	NA	NA	NA	NA	NA	NA	NA	NA	NA	NA	NA	NA	NA	NA	15.2547	NA	NA	NA	NA	NA	NA	NA	NA	21.251	18.3959	NA	NA	NA	NA	NA	NA	NA	NA	NA	NA	NA	NA	NA	NA	33.1709	25.8626	NA	NA	NA
C3L-00368-N	Normal	LUAD	21.9319	17.2997	-0.946823	NA	NA	NA	NA	NA	NA	NA	NA	NA	NA	NA	NA	NA	NA	NA	NA	NA	17.2997	NA	NA	NA	NA	NA	NA	NA	NA	NA	NA	NA	NA	NA	NA	NA	NA	NA	NA	NA	NA	NA	32.5048	24.4546	NA	NA	20.1118
C3L-00368-T	Tumor	LUAD	21.5745	19.6802	1.45476	NA	NA	NA	NA	NA	NA	NA	NA	NA	NA	NA	NA	NA	NA	NA	NA	NA	19.6802	NA	NA	NA	NA	NA	NA	NA	NA	NA	NA	NA	NA	NA	NA	NA	NA	NA	NA	NA	NA	NA	31.7693	24.9423	NA	NA	19.5689
C3L-00369-N	Normal	CCRCC	NA	NA	NA	NA	NA	NA	NA	NA	NA	NA	NA	NA	NA	NA	NA	NA	NA	NA	NA	NA	NA	NA	NA	NA	NA	NA	NA	NA	NA	NA	NA	NA	NA	NA	NA	NA	NA	NA	NA	NA	NA	NA	30.736	23.052	NA	NA	20.5257
C3L-00369-T	Tumor	CCRCC	NA	NA	NA	NA	NA	NA	NA	NA	NA	NA	NA	NA	NA	NA	NA	NA	NA	NA	NA	NA	NA	NA	NA	NA	NA	NA	NA	NA	NA	NA	NA	NA	NA	NA	NA	NA	NA	NA	NA	NA	NA	NA	31.999	23.5223	NA	NA	22.2916
C3L-00401-N	Normal	PDA	NA	15.8281	NA	NA	NA	NA	NA	NA	NA	NA	NA	NA	NA	NA	NA	15.8281	NA	NA	NA	NA	NA	NA	NA	NA	NA	NA	NA	NA	NA	NA	NA	NA	NA	NA	NA	NA	NA	NA	NA	NA	NA	NA	33.1369	23.505	NA	NA	NA
C3L-00401-T	Tumor	PDA	NA	17.64	NA	NA	NA	NA	NA	NA	NA	NA	NA	NA	NA	NA	NA	17.64	NA	NA	NA	NA	NA	NA	NA	NA	NA	NA	NA	NA	NA	NA	NA	NA	NA	NA	NA	NA	NA	NA	NA	NA	NA	NA	32.0376	23.6917	NA	NA	NA
C3L-00412-N	Normal	LUAD	21.3914	16.9775	-1.23715	NA	NA	15.8367	NA	NA	NA	NA	NA	NA	NA	NA	NA	16.4767	NA	NA	NA	NA	17.2989	NA	NA	NA	17.8398	NA	18.5533	15.8597	NA	NA	NA	NA	NA	NA	NA	NA	NA	NA	NA	NA	NA	NA	32.3522	24.1451	NA	NA	NA
C3L-00412-T	Tumor	LUAD	21.4859	17.6314	-0.588842	NA	NA	15.7344	NA	NA	NA	NA	NA	NA	NA	NA	NA	18.1799	NA	NA	NA	NA	18.4273	NA	NA	NA	17.7476	NA	19.2256	16.4734	NA	NA	NA	NA	NA	NA	NA	NA	NA	NA	NA	NA	NA	NA	32.2456	24.4935	NA	NA	NA
C3L-00413-T	Tumor	UCEC	NA	17.8453	NA	NA	NA	18.1306	NA	21.7651	NA	NA	16.236	NA	17.866	NA	NA	NA	NA	18.5539	13.6115	NA	NA	NA	NA	NA	NA	NA	21.1465	19.8235	NA	NA	NA	18.7077	NA	NA	NA	13.1244	17.3334	NA	NA	NA	NA	NA	32.0559	25.7882	NA	20.6152	21.9306
C3L-00415-N	Normal	LSCC	20.8716	18.4596	0.27554	NA	NA	16.7727	NA	20.2285	NA	NA	NA	NA	NA	NA	NA	19.3596	NA	19.1728	NA	NA	18.7758	NA	NA	NA	18.8455	NA	20.2812	18.9376	NA	NA	NA	17.8703	NA	NA	NA	NA	NA	NA	14.3519	NA	NA	NA	31.8615	25.4397	NA	NA	20.1605
C3L-00415-T	Tumor	LSCC	21.2091	18.8003	0.596334	NA	NA	16.2398	NA	20.7233	NA	NA	NA	NA	NA	NA	NA	20.3798	NA	19.3475	NA	NA	18.9637	NA	NA	NA	19.5534	NA	20.6475	19.2038	NA	NA	NA	17.7484	NA	NA	NA	NA	NA	NA	15.1954	NA	NA	NA	30.6659	26.1518	NA	NA	19.3675
C3L-00416-N	Normal	CCRCC	18.237	15.8273	-2.20152	NA	NA	NA	NA	NA	NA	NA	NA	NA	NA	NA	NA	NA	NA	NA	NA	NA	15.0473	NA	NA	NA	NA	NA	17.3163	15.1184	NA	NA	NA	NA	NA	NA	NA	NA	NA	NA	NA	NA	NA	NA	31.185	23.3384	NA	NA	20.1992
C3L-00416-T	Tumor	CCRCC	18.6394	16.6828	-1.36975	NA	NA	NA	NA	NA	NA	NA	NA	NA	NA	NA	NA	NA	NA	NA	NA	NA	16.2262	NA	NA	NA	NA	NA	17.9069	15.9153	NA	NA	NA	NA	NA	NA	NA	NA	NA	NA	NA	NA	NA	NA	31.4958	23.7869	NA	NA	21.8134
C3L-00418-N	Normal	CCRCC	NA	NA	NA	NA	NA	NA	NA	NA	NA	NA	NA	NA	NA	NA	NA	NA	NA	NA	NA	NA	NA	NA	NA	NA	NA	NA	NA	NA	NA	NA	NA	NA	NA	NA	NA	NA	NA	NA	NA	NA	NA	NA	30.0497	22.6596	NA	NA	20.5021
C3L-00418-T	Tumor	CCRCC	NA	NA	NA	NA	NA	NA	NA	NA	NA	NA	NA	NA	NA	NA	NA	NA	NA	NA	NA	NA	NA	NA	NA	NA	NA	NA	NA	NA	NA	NA	NA	NA	NA	NA	NA	NA	NA	NA	NA	NA	NA	NA	31.4794	24.0255	NA	NA	22.7184
C3L-00422-N	Normal	LUAD	21.1838	15.1354	-3.06703	NA	NA	NA	NA	NA	NA	NA	NA	NA	NA	NA	NA	16.4803	NA	NA	NA	NA	17.0632	NA	NA	NA	NA	NA	NA	NA	NA	NA	NA	NA	NA	NA	NA	NA	11.8627	NA	NA	NA	NA	NA	32.3946	24.3519	NA	NA	20.0864
C3L-00422-T	Tumor	LUAD	21.2904	16.3828	-1.82591	NA	NA	NA	NA	NA	NA	NA	NA	NA	NA	NA	NA	18.2514	NA	NA	NA	NA	18.7005	NA	NA	NA	NA	NA	NA	NA	NA	NA	NA	NA	NA	NA	NA	NA	12.1965	NA	NA	NA	NA	NA	31.4541	24.7845	NA	NA	20.0243
C3L-00445-N	Normal	LSCC	21.0273	18.6098	0.416614	NA	NA	NA	NA	NA	NA	NA	NA	NA	NA	NA	NA	18.1894	NA	NA	NA	NA	17.8945	NA	NA	NA	19.0726	NA	19.2958	18.5968	NA	NA	NA	NA	NA	NA	NA	NA	NA	NA	NA	NA	NA	NA	31.9902	25.3968	NA	NA	20.2252
C3L-00445-T	Tumor	LSCC	22.343	20.2384	1.96772	NA	NA	NA	NA	NA	NA	NA	NA	NA	NA	NA	NA	21.0342	NA	NA	NA	NA	19.2758	NA	NA	NA	19.5594	NA	20.9048	20.4179	NA	NA	NA	NA	NA	NA	NA	NA	NA	NA	NA	NA	NA	NA	31.3021	26.8503	NA	20.0083	20.2523
C3L-00447-N	Normal	CCRCC	17.9614	16.1496	-1.86298	NA	NA	NA	NA	NA	NA	NA	NA	NA	NA	NA	NA	NA	NA	NA	NA	NA	15.0145	NA	NA	NA	NA	NA	17.4853	15.9492	NA	NA	NA	NA	NA	NA	NA	NA	NA	NA	NA	NA	NA	NA	30.2136	23.3555	NA	NA	20.1024
C3L-00447-T	Tumor	CCRCC	19.5046	17.1458	-0.957698	NA	NA	NA	NA	NA	NA	NA	NA	NA	NA	NA	NA	NA	NA	NA	NA	NA	16.5888	NA	NA	NA	NA	NA	18.3138	16.5349	NA	NA	NA	NA	NA	NA	NA	NA	NA	NA	NA	NA	NA	NA	31.1859	24.7585	NA	NA	21.7455
C3L-00448-N	Normal	CCRCC	NA	NA	NA	NA	NA	NA	NA	NA	NA	NA	NA	NA	NA	NA	NA	NA	NA	NA	NA	NA	NA	NA	NA	NA	NA	NA	NA	NA	NA	NA	NA	NA	NA	NA	NA	NA	NA	NA	NA	NA	NA	NA	30.4972	22.6574	NA	NA	20.3712
C3L-00448-T	Tumor	CCRCC	NA	NA	NA	NA	NA	NA	NA	NA	NA	NA	NA	NA	NA	NA	NA	NA	NA	NA	NA	NA	NA	NA	NA	NA	NA	NA	NA	NA	NA	NA	NA	NA	NA	NA	NA	NA	NA	NA	NA	NA	NA	NA	31.6784	23.9358	NA	NA	22.9248
C3L-00449-T	Tumor	UCEC	NA	18.6021	NA	NA	NA	NA	NA	21.5683	NA	NA	NA	17.5187	NA	NA	NA	NA	NA	18.4056	NA	NA	NA	NA	NA	NA	NA	NA	18.0868	17.4312	NA	NA	NA	NA	NA	NA	NA	NA	NA	NA	NA	NA	NA	NA	32.3822	25.0459	NA	20.4494	21.0264
C3L-00510-N	Normal	LUAD	20.6374	17.0463	-1.1239	NA	NA	NA	NA	16.8505	NA	NA	NA	NA	NA	NA	NA	16.5437	NA	15.5276	NA	NA	NA	NA	NA	NA	17.8061	NA	19.5079	18.5041	NA	NA	NA	NA	NA	NA	NA	NA	NA	NA	14.5845	NA	NA	NA	32.6883	24.8616	NA	16.2066	20.2669
C3L-00510-T	Tumor	LUAD	21.8812	18.0091	-0.234365	NA	NA	NA	NA	18.1953	NA	NA	NA	NA	NA	NA	NA	18.9695	NA	15.928	NA	NA	19.279	NA	NA	NA	18.006	NA	19.7806	19.2341	NA	NA	NA	NA	NA	NA	NA	NA	NA	NA	14.6806	NA	NA	NA	31.2266	26.547	NA	17.1594	19.2451
C3L-00561-N	Normal	CCRCC	NA	NA	NA	NA	NA	NA	NA	NA	NA	NA	NA	NA	NA	NA	NA	NA	NA	NA	NA	NA	NA	NA	NA	NA	NA	NA	NA	NA	NA	NA	NA	NA	NA	NA	NA	NA	NA	NA	NA	NA	NA	NA	30.4343	22.9418	NA	NA	21.143
C3L-00561-T	Tumor	CCRCC	NA	NA	NA	NA	NA	NA	NA	NA	NA	NA	NA	NA	NA	NA	NA	NA	NA	NA	NA	NA	NA	NA	NA	NA	NA	NA	NA	NA	NA	NA	NA	NA	NA	NA	NA	NA	NA	NA	NA	NA	NA	NA	32.4311	24.3108	NA	NA	21.7052
C3L-00563-N	Normal	UCEC	NA	18.1698	NA	NA	NA	NA	NA	21.7245	NA	NA	16.9424	NA	16.4312	NA	NA	NA	NA	18.2707	NA	NA	NA	NA	15.5878	NA	NA	NA	21.1768	19.2494	NA	NA	NA	17.5505	NA	NA	NA	NA	NA	NA	16.595	NA	NA	NA	32.9297	25.2011	NA	20.8339	NA
C3L-00563-T	Tumor	UCEC	NA	18.5249	NA	NA	NA	NA	NA	21.5708	NA	NA	15.6107	NA	18.3141	NA	NA	NA	NA	18.9379	NA	NA	NA	NA	16.4928	NA	NA	NA	20.5877	19.574	NA	NA	NA	18.4435	NA	NA	NA	NA	NA	NA	17.1927	NA	NA	NA	31.4635	25.0935	NA	20.1419	NA
C3L-00568-N	Normal	LSCC	21.0566	17.606	-0.588917	15.6795	17.4208	NA	NA	19.3774	NA	NA	NA	NA	NA	NA	NA	18.6964	NA	NA	NA	13.5106	18.114	NA	NA	NA	19.0254	NA	19.352	18.0082	NA	NA	NA	17.4673	NA	NA	NA	NA	17.0147	NA	NA	NA	NA	NA	31.9404	25.5336	15.4453	18.553	NA
C3L-00568-T	Tumor	LSCC	21.9025	18.7825	0.537769	17.629	17.2581	NA	NA	21.2533	NA	NA	NA	NA	NA	NA	NA	21.2494	NA	NA	NA	14.0197	19.2736	NA	NA	NA	18.7917	NA	20.6591	20.3944	NA	NA	NA	17.6725	NA	NA	NA	NA	18.4071	NA	NA	NA	NA	NA	31.1639	26.5869	15.2028	19.4851	NA
C3L-00581-N	Normal	CCRCC	NA	NA	NA	NA	NA	NA	NA	NA	NA	NA	NA	NA	NA	NA	NA	NA	NA	NA	NA	NA	NA	NA	NA	NA	NA	NA	NA	NA	NA	NA	NA	NA	NA	NA	NA	NA	NA	NA	NA	NA	NA	NA	30.6248	22.8167	NA	NA	21.1214
C3L-00581-T	Tumor	CCRCC	NA	NA	NA	NA	NA	NA	NA	NA	NA	NA	NA	NA	NA	NA	NA	NA	NA	NA	NA	NA	NA	NA	NA	NA	NA	NA	NA	NA	NA	NA	NA	NA	NA	NA	NA	NA	NA	NA	NA	NA	NA	NA	31.2572	23.5071	NA	NA	21.8865
C3L-00583-N	Normal	CCRCC	17.1772	NA	NA	NA	NA	NA	NA	NA	NA	NA	NA	NA	NA	NA	NA	NA	NA	NA	NA	NA	NA	NA	NA	NA	NA	NA	NA	NA	NA	NA	NA	NA	NA	NA	NA	NA	NA	NA	NA	NA	NA	NA	30.6124	23.0091	NA	NA	20.7001
C3L-00583-T	Tumor	CCRCC	17.8536	NA	NA	NA	NA	NA	NA	NA	NA	NA	NA	NA	NA	NA	NA	NA	NA	NA	NA	NA	NA	NA	NA	NA	NA	NA	NA	NA	NA	NA	NA	NA	NA	NA	NA	NA	NA	NA	NA	NA	NA	NA	31.9015	24.3333	NA	NA	22.0267
C3L-00586-N	Normal	UCEC	NA	17.4812	NA	NA	NA	NA	NA	NA	NA	NA	16.3199	16.8249	18.1708	NA	NA	16.7152	NA	NA	NA	NA	17.9991	NA	NA	NA	NA	NA	20.5333	21.1961	15.3722	16.5921	NA	17.9277	NA	NA	NA	NA	16.2545	15.8687	NA	NA	NA	NA	33.0933	24.8854	NA	20.3173	20.5282
C3L-00586-T	Tumor	UCEC	NA	18.3403	NA	NA	NA	NA	NA	NA	NA	NA	15.7294	16.4692	17.9026	NA	NA	18.3939	NA	NA	NA	NA	19.5792	NA	NA	NA	NA	NA	21.5334	21.6585	16.4292	17.6182	NA	18.7255	NA	NA	NA	NA	17.8881	18.1571	NA	NA	NA	NA	31.5484	26.1575	NA	21.5928	20.5404
C3L-00589-N	Normal	PDA	19.3422	18.3062	0.21224	NA	NA	NA	NA	18.4069	NA	NA	NA	NA	NA	NA	NA	NA	NA	16.1075	NA	NA	16.9619	NA	NA	NA	NA	NA	19.1375	NA	NA	NA	NA	17.3938	NA	NA	NA	NA	NA	NA	NA	21.8296	NA	NA	31.2084	24.7638	NA	NA	NA
C3L-00589-T	Tumor	PDA	19.215	17.5804	-0.50603	NA	NA	NA	NA	18.212	NA	NA	NA	NA	NA	NA	NA	NA	NA	16.0648	NA	NA	16.5314	NA	NA	NA	NA	NA	18.3988	NA	NA	NA	NA	16.5211	NA	NA	NA	NA	NA	NA	NA	19.7545	NA	NA	32.0213	23.9817	NA	NA	NA
C3L-00598-T	Tumor	PDA	19.1016	17.302	-0.777801	NA	NA	NA	NA	NA	NA	NA	NA	NA	NA	NA	NA	18.5461	NA	NA	NA	NA	NA	NA	NA	NA	NA	NA	18.814	16.0172	NA	NA	NA	15.8307	NA	NA	NA	NA	NA	NA	NA	NA	NA	NA	32.0555	24.3738	NA	NA	18.2806
C3L-00599-T	Tumor	PDA	18.8705	17.3506	-0.715626	NA	NA	NA	NA	18.4011	NA	NA	NA	NA	NA	NA	NA	NA	NA	15.9584	NA	NA	16.1572	NA	NA	NA	NA	NA	18.2952	NA	NA	NA	NA	15.919	NA	NA	NA	NA	NA	NA	NA	19.3724	NA	NA	32.1086	24.0329	NA	NA	NA
C3L-00601-N	Normal	UCEC	NA	17.1478	NA	NA	NA	NA	NA	NA	NA	NA	15.9397	16.7764	17.7658	NA	NA	16.6676	NA	NA	NA	NA	16.9889	NA	NA	NA	NA	NA	20.0984	20.4907	14.4261	16.3028	NA	17.8559	NA	NA	NA	NA	16.1263	16.3345	NA	NA	NA	NA	33.0873	25.0265	NA	19.7841	19.4926
C3L-00601-T	Tumor	UCEC	NA	18.9641	NA	NA	NA	NA	NA	NA	NA	NA	16.9037	17.5938	18.3542	NA	NA	19.3673	NA	NA	NA	NA	21.3252	NA	NA	NA	NA	NA	22.1771	21.7307	16.68	18.0788	NA	18.9866	NA	NA	NA	NA	17.9159	18.4557	NA	NA	NA	NA	32.0334	26.977	NA	20.3724	21.2065
C3L-00603-N	Normal	LSCC	20.3373	17.0836	-1.06899	NA	17.2745	16.1728	NA	19.5109	NA	NA	NA	NA	NA	NA	NA	NA	NA	NA	NA	NA	17.7283	NA	NA	NA	18.5843	NA	17.2103	18.7162	NA	NA	NA	NA	NA	NA	NA	NA	17.156	NA	14.7249	NA	13.7576	NA	31.7859	25.927	NA	18.8875	20.6197
C3L-00603-T	Tumor	LSCC	22.5941	18.0622	-0.223346	NA	16.8426	16.0202	NA	21.7498	NA	NA	NA	NA	NA	14.3501	NA	NA	NA	NA	NA	NA	21.1543	NA	NA	NA	19.3303	NA	18.8841	20.4855	NA	NA	NA	NA	NA	NA	NA	NA	18.5366	NA	16.1469	NA	15.1833	NA	30.7948	27.2848	NA	18.7503	20.3723
C3L-00604-N	Normal	LUAD	21.6364	16.3941	-1.83499	NA	NA	16.1996	NA	17.0463	NA	NA	NA	NA	NA	NA	NA	NA	NA	15.6155	NA	NA	NA	NA	NA	NA	17.4761	NA	18.6205	16.4516	NA	NA	NA	NA	NA	NA	NA	NA	NA	NA	NA	NA	NA	13.3492	32.3646	24.8053	NA	17.2933	19.9476
C3L-00604-T	Tumor	LUAD	22.3492	17.5198	-0.751266	NA	NA	15.9246	NA	18.8012	NA	NA	NA	NA	NA	NA	NA	19.5182	NA	16.3529	NA	NA	NA	NA	NA	NA	18.4022	NA	19.5789	17.1603	NA	NA	NA	NA	NA	NA	NA	NA	NA	NA	NA	NA	NA	14.4203	31.6982	24.9412	NA	17.1301	19.6564
C3L-00605-N	Normal	UCEC	19.1096	17.9681	-0.112143	NA	NA	NA	NA	21.3354	NA	NA	NA	NA	NA	NA	NA	17.5097	14.7561	17.7205	NA	NA	17.6568	NA	NA	NA	NA	NA	19.0888	19.9682	NA	NA	NA	17.8925	NA	NA	NA	NA	16.3935	NA	17.3596	NA	NA	NA	33.0164	25.0448	NA	20.4294	20.3111
C3L-00605-T	Tumor	UCEC	20.0423	18.9501	0.814917	NA	NA	NA	NA	21.9958	NA	NA	NA	NA	NA	NA	NA	18.7868	15.0138	18.9156	NA	NA	20.2514	NA	NA	NA	NA	NA	20.3514	20.1284	NA	NA	NA	18.7707	NA	NA	NA	NA	17.6347	NA	17.6525	NA	NA	NA	31.9926	26.1695	NA	20.692	21.8625
C3L-00606-N	Normal	CCRCC	NA	NA	NA	NA	NA	NA	NA	NA	NA	NA	NA	NA	NA	NA	NA	NA	NA	NA	NA	NA	NA	NA	NA	NA	NA	NA	NA	NA	NA	NA	NA	NA	NA	NA	NA	NA	NA	NA	NA	NA	NA	NA	30.6871	23.3537	NA	NA	NA
C3L-00606-T	Tumor	CCRCC	NA	NA	NA	NA	NA	NA	NA	NA	NA	NA	NA	NA	NA	NA	NA	NA	NA	NA	NA	NA	NA	NA	NA	NA	NA	NA	NA	NA	NA	NA	NA	NA	NA	NA	NA	NA	NA	NA	NA	NA	NA	NA	32.0582	24.3937	NA	NA	NA
C3L-00607-N	Normal	CCRCC	NA	NA	NA	NA	NA	NA	NA	NA	NA	NA	NA	NA	NA	NA	NA	NA	NA	NA	NA	NA	NA	NA	NA	NA	NA	NA	NA	NA	NA	NA	NA	NA	NA	NA	NA	NA	NA	NA	NA	NA	NA	NA	30.4144	22.7947	NA	NA	20.5664
C3L-00607-T	Tumor	CCRCC	NA	NA	NA	NA	NA	NA	NA	NA	NA	NA	NA	NA	NA	NA	NA	NA	NA	NA	NA	NA	NA	NA	NA	NA	NA	NA	NA	NA	NA	NA	NA	NA	NA	NA	NA	NA	NA	NA	NA	NA	NA	NA	31.5142	23.57	NA	NA	21.2175
C3L-00610-T	Tumor	CCRCC	NA	NA	NA	NA	NA	NA	NA	NA	NA	NA	NA	NA	NA	NA	NA	NA	NA	NA	NA	NA	NA	NA	NA	NA	NA	NA	NA	NA	NA	NA	NA	NA	NA	NA	NA	NA	NA	NA	NA	NA	NA	NA	31.8831	23.5888	NA	NA	22.3559
C3L-00622-T	Tumor	PDA	NA	18.967	NA	NA	NA	NA	NA	NA	NA	NA	NA	NA	NA	NA	NA	18.4997	NA	NA	NA	NA	NA	NA	NA	NA	NA	NA	NA	NA	NA	NA	NA	NA	NA	NA	NA	NA	NA	NA	NA	19.4343	NA	NA	31.7395	23.8376	NA	NA	NA
C3L-00625-T	Tumor	PDA	18.9117	17.4203	-0.648269	NA	NA	NA	NA	NA	NA	NA	NA	NA	NA	NA	NA	17.4203	NA	NA	NA	NA	NA	NA	NA	NA	NA	NA	NA	NA	NA	NA	NA	NA	NA	NA	NA	NA	NA	NA	NA	NA	NA	NA	32.0307	23.8274	NA	NA	18.0366
C3L-00640-N	Normal	PDA	NA	17.5785	NA	NA	NA	NA	NA	18.3437	NA	NA	NA	NA	NA	NA	NA	16.3296	NA	NA	NA	NA	18.0621	NA	NA	NA	NA	NA	NA	NA	NA	NA	NA	NA	NA	NA	NA	NA	NA	NA	NA	NA	NA	NA	31.9227	23.8412	NA	NA	NA
C3L-00640-T	Tumor	PDA	NA	18.1986	NA	NA	NA	NA	NA	19.0521	NA	NA	NA	NA	NA	NA	NA	18.3368	NA	NA	NA	NA	17.2069	NA	NA	NA	NA	NA	NA	NA	NA	NA	NA	NA	NA	NA	NA	NA	NA	NA	NA	NA	NA	NA	32.1586	24.0162	NA	NA	NA
C3L-00674-T	Tumor	GBM	19.3325	17.9813	-0.112065	NA	NA	NA	NA	NA	NA	NA	NA	NA	NA	NA	NA	NA	NA	NA	NA	NA	NA	NA	NA	NA	NA	NA	21.3769	18.5234	NA	NA	14.9546	NA	NA	NA	NA	NA	NA	17.0704	NA	NA	NA	NA	32.8313	25.0626	NA	NA	19.2482
C3L-00677-T	Tumor	GBM	NA	17.9206	NA	NA	NA	NA	NA	19.6202	NA	NA	NA	NA	NA	NA	NA	NA	NA	NA	NA	NA	NA	17.1675	NA	NA	NA	15.759	20.6502	18.5077	NA	NA	NA	NA	NA	NA	NA	NA	NA	NA	15.8188	NA	NA	NA	32.6406	25.5345	NA	NA	19.0512
C3L-00765-T	Tumor	CCRCC	NA	NA	NA	NA	NA	NA	NA	NA	NA	NA	NA	NA	NA	NA	NA	NA	NA	NA	NA	NA	NA	NA	NA	NA	NA	NA	NA	NA	NA	NA	NA	NA	NA	NA	NA	NA	NA	NA	NA	NA	NA	NA	31.7714	23.6602	NA	NA	22.4418
C3L-00766-T	Tumor	CCRCC	NA	NA	NA	NA	NA	NA	NA	NA	NA	NA	NA	NA	NA	NA	NA	NA	NA	NA	NA	NA	NA	NA	NA	NA	NA	NA	NA	NA	NA	NA	NA	NA	NA	NA	NA	NA	NA	NA	NA	NA	NA	NA	31.1993	23.1771	NA	NA	21.208
C3L-00767-T	Tumor	UCEC	19.2955	18.2909	0.199663	NA	NA	NA	NA	21.5261	NA	NA	NA	NA	NA	NA	NA	18.2542	14.328	18.8897	NA	NA	18.2672	NA	NA	NA	NA	NA	19.4888	19.6525	NA	NA	NA	18.3505	NA	NA	NA	NA	16.7869	NA	17.3647	NA	NA	NA	33.7184	25.2313	NA	20.6644	20.414
C3L-00769-N	Normal	UCEC	NA	18.2727	NA	NA	NA	NA	NA	21.6562	NA	NA	NA	16.9982	NA	NA	NA	NA	NA	18.7488	NA	NA	NA	NA	NA	NA	NA	NA	17.1321	16.8281	NA	NA	NA	NA	NA	NA	NA	NA	NA	NA	NA	NA	NA	NA	32.9636	24.7781	NA	20.5073	20.391
C3L-00769-T	Tumor	UCEC	NA	18.3532	NA	NA	NA	NA	NA	21.6882	NA	NA	NA	16.4186	NA	NA	NA	NA	NA	18.2153	NA	NA	NA	NA	NA	NA	NA	NA	17.7352	17.7089	NA	NA	NA	NA	NA	NA	NA	NA	NA	NA	NA	NA	NA	NA	32.6733	25.6561	NA	20.4485	20.4675
C3L-00770-N	Normal	UCEC	20.4432	18.8013	0.642497	NA	NA	16.9558	NA	21.2841	NA	NA	NA	NA	18.0852	NA	NA	NA	NA	18.0222	NA	NA	18.6169	NA	NA	NA	NA	NA	21.2675	NA	NA	NA	NA	NA	NA	NA	NA	NA	NA	NA	17.3775	NA	NA	NA	32.9107	25.1288	NA	20.675	20.0764
C3L-00770-T	Tumor	UCEC	17.3239	20.0722	2.09712	NA	NA	17.9075	NA	22.9106	NA	NA	NA	NA	19.1902	NA	NA	NA	NA	19.6892	NA	NA	20.5982	NA	NA	NA	NA	NA	21.3881	NA	NA	NA	NA	NA	NA	NA	NA	NA	NA	NA	18.8216	NA	NA	NA	31.4036	26.1875	NA	21.547	20.645
C3L-00771-N	Normal	UCEC	NA	18.3561	NA	NA	NA	NA	NA	21.1468	NA	NA	16.8339	NA	17.4575	NA	NA	NA	NA	18.2356	NA	NA	NA	NA	16.1799	NA	NA	NA	21.2722	19.2035	NA	NA	NA	18.1998	NA	NA	NA	NA	NA	NA	16.6759	NA	NA	NA	33.0034	24.9134	NA	20.6895	NA
C3L-00771-T	Tumor	UCEC	NA	18.6425	NA	NA	NA	NA	NA	21.3813	NA	NA	16.7421	NA	17.8857	NA	NA	NA	NA	18.3579	NA	NA	NA	NA	16.6931	NA	NA	NA	21.2569	19.9511	NA	NA	NA	18.3949	NA	NA	NA	NA	NA	NA	17.1192	NA	NA	NA	33.0453	25.0573	NA	20.6735	NA
C3L-00780-T	Tumor	UCEC	NA	18.3533	NA	NA	NA	18.2908	NA	20.8947	NA	NA	NA	NA	NA	NA	NA	NA	NA	18.2511	NA	NA	18.6384	NA	NA	NA	16.2032	NA	20.8045	20.0231	15.0999	NA	NA	18.2407	NA	NA	NA	NA	17.0868	NA	NA	NA	NA	NA	32.1	25.1662	NA	20.9222	NA
C3L-00781-T	Tumor	UCEC	NA	18.2527	NA	NA	NA	18.1831	NA	22.4114	NA	NA	NA	16.7744	NA	NA	NA	18.1998	14.7169	18.6911	NA	NA	NA	NA	NA	NA	NA	NA	20.1285	20.1393	NA	17.7416	NA	16.7536	NA	NA	NA	NA	17.6193	NA	17.6737	NA	NA	NA	31.6705	26.3334	NA	21.0679	20.6415
C3L-00790-T	Tumor	CCRCC	NA	NA	NA	NA	NA	NA	NA	NA	NA	NA	NA	NA	NA	NA	NA	NA	NA	NA	NA	NA	NA	NA	NA	NA	NA	NA	NA	NA	NA	NA	NA	NA	NA	NA	NA	NA	NA	NA	NA	NA	NA	NA	31.8768	24.0846	NA	NA	21.326
C3L-00791-N	Normal	CCRCC	NA	NA	NA	NA	NA	NA	NA	NA	NA	NA	NA	NA	NA	NA	NA	NA	NA	NA	NA	NA	NA	NA	NA	NA	NA	NA	NA	NA	NA	NA	NA	NA	NA	NA	NA	NA	NA	NA	NA	NA	NA	NA	30.1927	23.1741	NA	NA	20.5379
C3L-00791-T	Tumor	CCRCC	NA	NA	NA	NA	NA	NA	NA	NA	NA	NA	NA	NA	NA	NA	NA	NA	NA	NA	NA	NA	NA	NA	NA	NA	NA	NA	NA	NA	NA	NA	NA	NA	NA	NA	NA	NA	NA	NA	NA	NA	NA	NA	31.7919	24.7503	NA	NA	22.3123
C3L-00792-T	Tumor	CCRCC	NA	NA	NA	NA	NA	NA	NA	NA	NA	NA	NA	NA	NA	NA	NA	NA	NA	NA	NA	NA	NA	NA	NA	NA	NA	NA	NA	NA	NA	NA	NA	NA	NA	NA	NA	NA	NA	NA	NA	NA	NA	NA	30.8713	23.9867	NA	NA	22.8117
C3L-00796-T	Tumor	CCRCC	NA	NA	NA	NA	NA	NA	NA	NA	NA	NA	NA	NA	NA	NA	NA	NA	NA	NA	NA	NA	NA	NA	NA	NA	NA	NA	NA	NA	NA	NA	NA	NA	NA	NA	NA	NA	NA	NA	NA	NA	NA	NA	31.3133	24.746	NA	NA	21.6777
C3L-00799-T	Tumor	CCRCC	NA	NA	NA	NA	NA	NA	NA	NA	NA	NA	NA	NA	NA	NA	NA	NA	NA	NA	NA	NA	NA	NA	NA	NA	NA	NA	NA	NA	NA	NA	NA	NA	NA	NA	NA	NA	NA	NA	NA	NA	NA	NA	31.6371	24.4962	NA	NA	21.5271
C3L-00800-T	Tumor	CCRCC	NA	NA	NA	NA	NA	NA	NA	NA	NA	NA	NA	NA	NA	NA	NA	NA	NA	NA	NA	NA	NA	NA	NA	NA	NA	NA	NA	NA	NA	NA	NA	NA	NA	NA	NA	NA	NA	NA	NA	NA	NA	NA	31.5374	24.938	NA	NA	21.9004
C3L-00812-T	Tumor	CCRCC	NA	NA	NA	NA	NA	NA	NA	NA	NA	NA	NA	NA	NA	NA	NA	NA	NA	NA	NA	NA	NA	NA	NA	NA	NA	NA	NA	NA	NA	NA	NA	NA	NA	NA	NA	NA	NA	NA	NA	NA	NA	NA	31.8948	23.667	NA	NA	21.8786
C3L-00813-T	Tumor	CCRCC	NA	NA	NA	NA	NA	NA	NA	NA	NA	NA	NA	NA	NA	NA	NA	NA	NA	NA	NA	NA	NA	NA	NA	NA	NA	NA	NA	NA	NA	NA	NA	NA	NA	NA	NA	NA	NA	NA	NA	NA	NA	NA	31.739	23.9793	NA	NA	22.097
C3L-00814-N	Normal	CCRCC	17.8931	14.5206	-3.48802	NA	NA	NA	NA	NA	NA	NA	NA	NA	NA	NA	NA	12.9951	NA	NA	NA	NA	NA	NA	NA	NA	NA	NA	17.5443	15.8227	NA	NA	NA	NA	13.4137	NA	NA	NA	12.8273	NA	NA	NA	NA	NA	30.6313	23.2693	NA	NA	20.5689
C3L-00814-T	Tumor	CCRCC	18.1715	14.7269	-3.29806	NA	NA	NA	NA	NA	NA	NA	NA	NA	NA	NA	NA	13.2941	NA	NA	NA	NA	NA	NA	NA	NA	NA	NA	17.6941	15.4871	NA	NA	NA	NA	13.9556	NA	NA	NA	13.2038	NA	NA	NA	NA	NA	31.4217	24.5262	NA	NA	23.0196
C3L-00817-T	Tumor	CCRCC	NA	NA	NA	NA	NA	NA	NA	NA	NA	NA	NA	NA	NA	NA	NA	NA	NA	NA	NA	NA	NA	NA	NA	NA	NA	NA	NA	NA	NA	NA	NA	NA	NA	NA	NA	NA	NA	NA	NA	NA	NA	NA	31.5383	23.7889	NA	NA	22.1984
C3L-00819-N	Normal	PDA	19.5982	16.4957	-1.61337	NA	NA	NA	NA	18.3873	NA	NA	NA	NA	NA	NA	NA	16.8794	NA	NA	NA	NA	NA	NA	NA	NA	NA	NA	18.7457	16.273	NA	NA	NA	16.9049	NA	NA	NA	NA	14.2871	13.9922	NA	NA	NA	NA	31.451	24.6459	NA	NA	17.7246
C3L-00819-T	Tumor	PDA	19.3333	16.3407	-1.75275	NA	NA	NA	NA	18.7494	NA	NA	NA	NA	NA	NA	NA	17.2416	NA	NA	NA	NA	NA	NA	NA	NA	NA	NA	18.4	15.6957	NA	NA	NA	16.7363	NA	NA	NA	NA	14.2213	13.3405	NA	NA	NA	NA	32.1569	24.1672	NA	NA	17.9626
C3L-00881-N	Normal	PDA	NA	17.7605	NA	NA	NA	NA	NA	NA	NA	NA	NA	NA	NA	NA	NA	16.7497	NA	NA	NA	NA	NA	NA	NA	NA	NA	NA	18.7713	NA	NA	NA	NA	NA	NA	NA	NA	NA	NA	NA	NA	NA	NA	NA	30.6555	23.7918	NA	NA	19.3579
C3L-00881-T	Tumor	PDA	NA	17.8713	NA	NA	NA	NA	NA	NA	NA	NA	NA	NA	NA	NA	NA	17.277	NA	NA	NA	NA	NA	NA	NA	NA	NA	NA	18.4655	NA	NA	NA	NA	NA	NA	NA	NA	NA	NA	NA	NA	NA	NA	NA	31.5392	24.3301	NA	NA	17.7284
C3L-00893-N	Normal	LUAD	21.2702	17.0359	-1.17161	NA	NA	NA	NA	NA	NA	NA	NA	NA	NA	NA	NA	16.2889	NA	NA	NA	NA	17.783	NA	NA	NA	NA	NA	NA	NA	NA	NA	NA	NA	NA	NA	NA	NA	NA	NA	NA	NA	NA	NA	32.2973	24.5328	NA	NA	20.2806
C3L-00893-T	Tumor	LUAD	20.9234	17.7906	-0.396454	NA	NA	NA	NA	NA	NA	NA	NA	NA	NA	NA	NA	17.3422	NA	NA	NA	NA	18.2391	NA	NA	NA	NA	NA	NA	NA	NA	NA	NA	NA	NA	NA	NA	NA	NA	NA	NA	NA	NA	NA	31.9326	24.2581	NA	NA	19.8021
C3L-00902-N	Normal	CCRCC	NA	NA	NA	NA	NA	NA	NA	NA	NA	NA	NA	NA	NA	NA	NA	NA	NA	NA	NA	NA	NA	NA	NA	NA	NA	NA	NA	NA	NA	NA	NA	NA	NA	NA	NA	NA	NA	NA	NA	NA	NA	NA	30.5282	23.1046	NA	NA	20.8308
C3L-00902-T	Tumor	CCRCC	NA	NA	NA	NA	NA	NA	NA	NA	NA	NA	NA	NA	NA	NA	NA	NA	NA	NA	NA	NA	NA	NA	NA	NA	NA	NA	NA	NA	NA	NA	NA	NA	NA	NA	NA	NA	NA	NA	NA	NA	NA	NA	31.2472	23.6158	NA	NA	22.452
C3L-00904-N	Normal	LSCC	20.1802	18.1888	0.0454747	NA	NA	NA	NA	NA	NA	NA	NA	NA	NA	NA	NA	17.9054	NA	18.5745	NA	NA	17.6018	NA	NA	NA	NA	NA	18.9495	18.5589	NA	NA	NA	NA	NA	NA	NA	NA	17.5426	NA	NA	NA	NA	NA	32.0882	25.2398	NA	NA	20.3188
C3L-00904-T	Tumor	LSCC	21.7461	19.1637	0.92811	NA	NA	NA	NA	NA	NA	NA	NA	NA	NA	NA	NA	20.2149	NA	19.4113	NA	NA	18.5718	NA	NA	NA	NA	NA	19.933	19.5428	NA	NA	NA	NA	NA	NA	NA	NA	17.3082	NA	NA	NA	NA	NA	31.0783	26.1176	NA	NA	20.3882
C3L-00905-T	Tumor	UCEC	19.0865	19.4725	1.39362	NA	NA	17.9398	NA	22.0782	NA	NA	NA	NA	18.9705	NA	NA	NA	NA	NA	NA	NA	NA	NA	NA	NA	NA	NA	19.5921	21.4049	NA	NA	NA	18.5762	NA	NA	NA	NA	NA	17.746	NA	NA	NA	NA	31.678	26.4531	NA	20.6896	21.5801
C3L-00907-N	Normal	CCRCC	NA	NA	NA	NA	NA	NA	NA	NA	NA	NA	NA	NA	NA	NA	NA	NA	NA	NA	NA	NA	NA	NA	NA	NA	NA	NA	NA	NA	NA	NA	NA	NA	NA	NA	NA	NA	NA	NA	NA	NA	NA	NA	30.4815	22.9165	NA	NA	20.3324
C3L-00907-T	Tumor	CCRCC	NA	NA	NA	NA	NA	NA	NA	NA	NA	NA	NA	NA	NA	NA	NA	NA	NA	NA	NA	NA	NA	NA	NA	NA	NA	NA	NA	NA	NA	NA	NA	NA	NA	NA	NA	NA	NA	NA	NA	NA	NA	NA	31.4767	24.0814	NA	NA	21.6579
C3L-00908-N	Normal	CCRCC	18.0895	14.6266	-3.39357	NA	NA	NA	NA	NA	NA	NA	NA	NA	NA	NA	NA	13.3926	NA	NA	NA	NA	NA	NA	NA	NA	NA	NA	17.6324	15.6912	NA	NA	NA	NA	13.5467	NA	NA	NA	12.8702	NA	NA	NA	NA	NA	30.4468	23.475	NA	NA	20.6424
C3L-00908-T	Tumor	CCRCC	18.6492	15.1558	-2.89733	NA	NA	NA	NA	NA	NA	NA	NA	NA	NA	NA	NA	15.0829	NA	NA	NA	NA	NA	NA	NA	NA	NA	NA	17.7486	15.6123	NA	NA	NA	NA	14.1027	NA	NA	NA	13.2327	NA	NA	NA	NA	NA	31.4156	24.1596	NA	NA	22.3517
C3L-00910-N	Normal	CCRCC	NA	13.623	NA	NA	NA	NA	NA	NA	NA	NA	NA	NA	NA	NA	NA	13.623	NA	NA	NA	NA	NA	NA	NA	NA	NA	NA	NA	NA	NA	NA	NA	NA	NA	NA	NA	NA	NA	NA	NA	NA	NA	NA	30.448	22.9755	NA	NA	20.3609
C3L-00910-T	Tumor	CCRCC	NA	13.4429	NA	NA	NA	NA	NA	NA	NA	NA	NA	NA	NA	NA	NA	13.4429	NA	NA	NA	NA	NA	NA	NA	NA	NA	NA	NA	NA	NA	NA	NA	NA	NA	NA	NA	NA	NA	NA	NA	NA	NA	NA	31.91	24.1493	NA	NA	22.6267
C3L-00913-N	Normal	LUAD	NA	17.3322	NA	NA	NA	NA	NA	NA	NA	NA	NA	NA	NA	NA	NA	NA	NA	15.8727	NA	NA	NA	NA	NA	NA	17.9126	NA	19.6888	18.5817	NA	NA	NA	NA	NA	NA	NA	NA	NA	NA	14.6052	NA	NA	NA	31.8731	24.7422	NA	16.3512	20.4611
C3L-00913-T	Tumor	LUAD	23.3605	18.5387	0.208087	NA	NA	NA	NA	19.093	NA	NA	NA	NA	NA	NA	NA	19.7056	NA	17.5399	NA	NA	19.6397	NA	NA	NA	18.2959	NA	20.3094	18.5673	NA	NA	NA	NA	NA	NA	NA	NA	NA	NA	15.159	NA	NA	NA	31.5855	25.2627	NA	18.8815	19.4906
C3L-00917-N	Normal	CCRCC	18.3122	16.8068	-1.22651	NA	NA	NA	NA	NA	NA	NA	NA	NA	NA	NA	NA	NA	NA	NA	NA	NA	15.9063	NA	NA	NA	NA	NA	17.7072	NA	NA	NA	NA	NA	NA	NA	NA	NA	NA	NA	NA	NA	NA	NA	30.2084	23.4421	NA	NA	19.8333
C3L-00917-T	Tumor	CCRCC	18.0923	16.3654	-1.65495	NA	NA	NA	NA	NA	NA	NA	NA	NA	NA	NA	NA	NA	NA	NA	NA	NA	14.9891	NA	NA	NA	NA	NA	17.7417	NA	NA	NA	NA	NA	NA	NA	NA	NA	NA	NA	NA	NA	NA	NA	31.6831	24.1295	NA	NA	21.4134
C3L-00918-T	Tumor	UCEC	NA	18.6629	NA	NA	NA	17.9893	NA	21.8736	NA	NA	NA	NA	NA	NA	NA	NA	NA	18.2489	NA	NA	19.5517	NA	NA	NA	15.9232	NA	21.0902	20.4266	16.0466	NA	NA	18.3628	NA	NA	NA	NA	17.116	NA	NA	NA	NA	NA	32.0933	25.8464	NA	20.6147	NA
C3L-00921-T	Tumor	UCEC	NA	17.7598	NA	14.049	NA	NA	NA	NA	NA	NA	NA	NA	NA	NA	NA	NA	NA	NA	NA	NA	19.5063	NA	NA	NA	NA	NA	20.9241	19.9331	15.3886	NA	NA	NA	NA	NA	NA	NA	16.7577	NA	NA	NA	NA	NA	32.8126	24.9973	NA	20.6911	NA
C3L-00923-N	Normal	LSCC	22.5216	17.8488	-0.432445	NA	NA	NA	NA	NA	NA	NA	NA	NA	NA	NA	NA	18.0836	NA	NA	NA	NA	17.5653	NA	NA	NA	17.6762	NA	19.1202	17.6638	NA	NA	NA	NA	NA	NA	NA	NA	16.9836	NA	NA	NA	NA	NA	32.1949	24.6695	NA	NA	20.6844
C3L-00923-T	Tumor	LSCC	21.4524	19.2275	1.00929	NA	NA	NA	NA	NA	NA	NA	NA	NA	NA	NA	NA	21.0968	NA	NA	NA	NA	19.0486	NA	NA	NA	18.6862	NA	20.0026	18.2605	NA	NA	NA	NA	NA	NA	NA	NA	18.2706	NA	NA	NA	NA	NA	31.6052	26.0659	NA	NA	19.7972
C3L-00927-N	Normal	LSCC	20.2402	18.1331	-0.0138022	NA	NA	NA	NA	NA	NA	NA	NA	NA	NA	NA	NA	18.0675	NA	19.497	NA	NA	17.5847	NA	NA	NA	18.5002	NA	16.8299	18.3189	NA	NA	NA	NA	NA	NA	NA	NA	NA	NA	NA	NA	NA	NA	32.0297	25.7892	NA	NA	21.6247
C3L-00927-T	Tumor	LSCC	22.2853	19.5442	1.27686	NA	NA	NA	NA	NA	NA	NA	NA	NA	NA	NA	NA	20.4605	NA	19.6449	NA	NA	18.8376	NA	NA	NA	19.0095	NA	18.9436	20.369	NA	NA	NA	NA	NA	NA	NA	NA	NA	NA	NA	NA	NA	NA	30.8665	26.5056	NA	NA	19.6903
C3L-00928-N	Normal	PDA	19.5407	16.3716	-1.73404	NA	NA	NA	NA	NA	NA	NA	NA	NA	NA	NA	NA	17.1724	NA	NA	NA	NA	NA	NA	NA	NA	NA	NA	18.8596	15.0813	NA	NA	NA	14.3732	NA	NA	NA	NA	NA	NA	NA	NA	NA	NA	30.5401	24.2162	NA	NA	17.9547
C3L-00928-T	Tumor	PDA	19.5947	16.6842	-1.42461	NA	NA	NA	NA	NA	NA	NA	NA	NA	NA	NA	NA	16.9196	NA	NA	NA	NA	NA	NA	NA	NA	NA	NA	18.7695	15.7417	NA	NA	NA	15.3062	NA	NA	NA	NA	NA	NA	NA	NA	NA	NA	32.4753	24.0968	NA	NA	17.5925
C3L-00930-N	Normal	UCEC	NA	18.2909	NA	NA	NA	17.0918	NA	20.6281	NA	NA	NA	NA	NA	NA	NA	NA	NA	18.9026	NA	NA	19.7641	NA	NA	NA	15.8341	NA	20.9046	18.9584	15.6721	NA	NA	18.3897	NA	NA	NA	NA	16.7633	NA	NA	NA	NA	NA	32.7534	24.885	NA	20.3904	NA
C3L-00932-N	Normal	UCEC	NA	18.4934	NA	NA	NA	NA	NA	21.3485	NA	NA	NA	NA	NA	NA	NA	NA	NA	18.2491	NA	NA	NA	NA	NA	NA	NA	NA	20.7425	21.3037	14.8653	NA	NA	NA	NA	NA	NA	NA	16.8265	16.118	NA	NA	NA	NA	32.927	25.1529	NA	20.6025	NA
C3L-00932-T	Tumor	UCEC	NA	18.9948	NA	NA	NA	NA	NA	21.6837	NA	NA	NA	NA	NA	NA	NA	NA	NA	18.6045	NA	NA	NA	NA	NA	NA	NA	NA	20.9263	21.1093	15.957	NA	NA	NA	NA	NA	NA	NA	17.002	17.6807	NA	NA	NA	NA	32.4377	25.3688	NA	20.3174	NA
C3L-00938-T	Tumor	UCEC	NA	17.5382	NA	13.6079	NA	NA	NA	NA	NA	NA	NA	NA	NA	NA	NA	NA	NA	NA	NA	NA	18.5915	NA	NA	NA	NA	NA	20.8762	19.5982	15.1242	NA	NA	NA	NA	NA	NA	NA	17.431	NA	NA	NA	NA	NA	32.8701	24.9315	NA	20.894	NA
C3L-00942-T	Tumor	UCEC	20.0129	18.109	-0.0245129	NA	NA	17.76	NA	21.8128	NA	NA	NA	NA	18.5799	NA	NA	17.9979	NA	18.5964	NA	NA	NA	NA	NA	NA	15.9469	NA	19.3979	20.8367	NA	NA	NA	NA	NA	NA	NA	NA	NA	NA	17.4336	NA	NA	12.7274	32.1992	25.2405	NA	20.2724	20.0708
C3L-00946-T	Tumor	UCEC	19.2799	20.2315	2.1412	NA	NA	17.4495	NA	22.6381	NA	NA	NA	NA	NA	NA	NA	NA	NA	18.9786	NA	NA	20.4077	NA	NA	NA	NA	NA	NA	21.6835	NA	NA	NA	NA	NA	NA	NA	NA	NA	NA	NA	NA	NA	NA	31.5468	25.9279	NA	20.8157	NA
C3L-00947-N	Normal	UCEC	19.5997	19.2662	1.15707	NA	NA	17.6901	NA	20.5441	NA	NA	NA	NA	NA	NA	NA	NA	NA	18.2244	NA	NA	NA	NA	NA	NA	NA	NA	NA	20.9969	NA	NA	NA	18.8755	NA	NA	NA	NA	NA	NA	NA	NA	NA	NA	32.7939	24.959	NA	19.764	NA
C3L-00947-T	Tumor	UCEC	19.6923	19.9229	1.80834	NA	NA	17.5322	NA	22.5372	NA	NA	NA	NA	NA	NA	NA	NA	NA	19.7848	NA	NA	NA	NA	NA	NA	NA	NA	NA	21.2692	NA	NA	NA	18.4912	NA	NA	NA	NA	NA	NA	NA	NA	NA	NA	31.9554	26.0012	NA	20.2861	NA
C3L-00949-T	Tumor	UCEC	19.9736	19.4611	1.32998	NA	NA	17.6487	NA	21.7774	NA	NA	NA	NA	NA	NA	NA	NA	NA	NA	NA	NA	19.3845	NA	NA	NA	NA	NA	NA	20.8043	NA	NA	NA	NA	NA	NA	NA	NA	NA	NA	17.6908	NA	NA	NA	32.9136	25.508	NA	NA	NA
C3L-00961-T	Tumor	UCEC	NA	18.9419	NA	NA	NA	NA	NA	21.4402	NA	NA	NA	NA	NA	NA	NA	NA	NA	18.5601	NA	NA	NA	NA	NA	NA	NA	NA	20.5719	21.3838	15.9941	NA	NA	NA	NA	NA	NA	NA	17.0318	17.6113	NA	NA	NA	NA	32.4835	25.5528	NA	20.5453	NA
C3L-00963-N	Normal	UCEC	NA	18.6862	NA	NA	NA	NA	NA	21.3982	NA	NA	NA	NA	NA	NA	NA	NA	NA	17.9627	NA	NA	NA	NA	NA	NA	NA	NA	21.2573	21.0758	14.5496	NA	NA	NA	NA	NA	NA	NA	16.7281	17.8313	NA	NA	NA	NA	32.9441	24.9132	NA	20.3518	NA
C3L-00963-T	Tumor	UCEC	NA	19.1767	NA	NA	NA	NA	NA	21.5927	NA	NA	NA	NA	NA	NA	NA	NA	NA	18.9576	NA	NA	NA	NA	NA	NA	NA	NA	21.1007	21.526	16.2642	NA	NA	NA	NA	NA	NA	NA	17.7377	17.0581	NA	NA	NA	NA	31.4526	25.8896	NA	21.1262	NA
C3L-00965-T	Tumor	LSCC	22.9124	20.5636	2.25936	18.5686	NA	NA	NA	22.7469	NA	NA	NA	NA	NA	NA	NA	21.7971	NA	NA	NA	NA	19.7748	NA	NA	NA	20.2267	NA	21.1981	21.0627	NA	NA	NA	NA	NA	NA	NA	NA	19.1339	NA	NA	NA	NA	NA	31.3629	27.1855	NA	20.2757	19.8335
C3L-00973-N	Normal	LUAD	21.5021	16.6727	-1.54847	14.7323	NA	NA	NA	NA	NA	NA	NA	NA	NA	NA	NA	NA	NA	NA	NA	NA	NA	NA	NA	NA	NA	NA	18.7161	16.5697	NA	NA	NA	NA	NA	NA	NA	NA	NA	NA	NA	NA	NA	NA	32.0964	24.5377	NA	17.4518	NA
C3L-00973-T	Tumor	LUAD	21.2801	17.197	-1.01115	16.1767	NA	NA	NA	NA	NA	NA	NA	NA	NA	NA	NA	NA	NA	NA	NA	NA	NA	NA	NA	NA	NA	NA	18.9974	16.4167	NA	NA	NA	NA	NA	NA	NA	NA	NA	NA	NA	NA	NA	NA	31.8647	25.0991	NA	17.3013	NA
C3L-00977-T	Tumor	HNSCC	19.0058	19.7923	1.71814	NA	NA	NA	NA	21.3055	NA	NA	NA	NA	NA	NA	NA	16.899	NA	NA	NA	NA	18.4608	NA	NA	NA	NA	NA	21.9657	NA	NA	NA	NA	19.5441	NA	NA	NA	NA	NA	NA	NA	20.5786	NA	NA	31.4532	25.7641	NA	NA	20.8564
C3L-00987-T	Tumor	HNSCC	20.1209	18.583	0.443163	NA	NA	15.4987	NA	21.2461	NA	NA	NA	NA	NA	NA	NA	17.805	NA	NA	NA	NA	NA	NA	NA	17.4155	NA	NA	21.9168	19.6115	NA	NA	NA	NA	NA	NA	NA	NA	NA	NA	NA	NA	NA	16.5874	31.2047	25.8073	NA	NA	NA
C3L-00993-N	Normal	LSCC	20.9663	16.7947	-1.39491	NA	16.7958	16.2481	NA	19.1124	NA	12.7934	NA	NA	NA	NA	NA	NA	NA	NA	NA	NA	17.2887	NA	NA	NA	17.7425	NA	16.9931	18.7287	NA	NA	NA	17.3327	NA	NA	NA	NA	16.863	NA	14.8434	NA	NA	NA	32.0036	25.3992	NA	NA	19.8855
C3L-00993-T	Tumor	LSCC	22.3616	18.2632	-0.00865398	NA	16.9112	16.9803	NA	21.4537	NA	14.1696	NA	NA	NA	NA	NA	20.8689	NA	NA	NA	NA	19.2171	NA	NA	NA	19.4653	NA	18.3535	19.7706	NA	NA	NA	18.3813	NA	NA	NA	NA	17.8249	NA	15.7615	NA	NA	NA	30.5622	26.9042	NA	NA	20.0829
C3L-00994-N	Normal	HNSCC	19.1309	18.9537	0.872206	NA	NA	NA	NA	19.4532	NA	NA	NA	NA	NA	NA	NA	16.2899	NA	NA	NA	NA	17.2451	NA	NA	NA	NA	NA	21.1726	NA	NA	NA	NA	18.6854	NA	NA	NA	NA	NA	NA	NA	20.8761	NA	NA	31.7675	25.1597	NA	NA	20.6429
C3L-00994-T	Tumor	HNSCC	19.8386	19.5459	1.42274	NA	NA	NA	NA	20.653	NA	NA	NA	NA	NA	NA	NA	17.2318	NA	NA	NA	NA	18.5665	NA	NA	NA	NA	NA	21.6029	NA	NA	NA	NA	18.8869	NA	NA	NA	NA	NA	NA	NA	20.3346	NA	NA	31.6683	25.3622	NA	NA	20.55
C3L-00995-N	Normal	HNSCC	18.0936	16.3726	-1.64776	NA	NA	NA	NA	NA	NA	NA	NA	NA	NA	NA	NA	NA	NA	NA	NA	NA	16.4318	NA	NA	NA	NA	NA	NA	NA	NA	NA	NA	NA	NA	NA	NA	NA	NA	NA	NA	NA	NA	16.3135	32.2772	24.3829	NA	NA	NA
C3L-00995-T	Tumor	HNSCC	19.4198	17.2091	-0.889437	NA	NA	NA	NA	NA	NA	NA	NA	NA	NA	NA	NA	17.1525	NA	NA	NA	NA	18.2718	NA	NA	NA	NA	NA	NA	NA	NA	NA	NA	NA	NA	NA	NA	NA	NA	NA	NA	NA	NA	16.203	32.0627	25.2309	NA	NA	NA
C3L-00997-N	Normal	HNSCC	18.8784	16.9988	-1.06783	NA	14.754	NA	NA	19.5784	NA	NA	NA	NA	NA	NA	NA	NA	NA	NA	NA	NA	NA	NA	NA	NA	17.995	NA	16.8817	18.1887	NA	NA	NA	18.5506	13.4733	NA	NA	NA	17.0622	18.1544	16.7801	NA	NA	15.5684	31.7292	25.2897	NA	11.1516	NA
C3L-00997-T	Tumor	HNSCC	19.8563	17.7343	-0.389969	NA	15.0917	NA	NA	21.4008	NA	NA	NA	NA	NA	NA	NA	NA	NA	NA	NA	NA	NA	NA	NA	NA	18.5715	NA	17.7019	18.666	NA	NA	NA	19.0894	14.5815	NA	NA	NA	17.3794	17.8871	17.2835	NA	NA	17.4242	31.4111	26.3396	NA	10.9595	NA
C3L-00999-N	Normal	HNSCC	NA	17.3581	NA	14.1832	NA	14.9662	NA	19.4629	NA	NA	NA	NA	NA	NA	NA	NA	NA	NA	NA	NA	NA	NA	NA	NA	17.7537	NA	20.5099	17.9759	NA	NA	NA	19.38	NA	NA	NA	NA	16.8086	16.9053	NA	NA	NA	15.6351	31.8863	24.3693	NA	NA	19.7048
C3L-00999-T	Tumor	HNSCC	NA	17.6239	NA	14.8415	NA	14.8731	NA	20.0481	NA	NA	NA	NA	NA	NA	NA	NA	NA	NA	NA	NA	NA	NA	NA	NA	18.1686	NA	21.029	17.9667	NA	NA	NA	18.805	NA	NA	NA	NA	16.9784	17.4911	NA	NA	NA	16.038	31.9418	25.1558	NA	NA	20.2268
C3L-01000-N	Normal	LSCC	20.5448	17.4371	-0.727708	NA	17.4656	16.1314	NA	19.7473	NA	NA	NA	NA	NA	NA	NA	18.3642	NA	NA	NA	NA	NA	NA	NA	NA	18.4241	NA	18.8434	19.1757	NA	NA	NA	NA	NA	NA	NA	NA	17.1761	NA	15.0737	NA	13.9694	NA	32.0499	25.1944	NA	NA	20.525
C3L-01000-T	Tumor	LSCC	23.1945	19.657	1.33612	NA	18.0268	17.7762	NA	22.5913	NA	NA	NA	NA	NA	NA	NA	23.1289	NA	NA	NA	NA	NA	NA	NA	NA	20.4913	NA	21.3279	21.1082	NA	NA	NA	NA	NA	NA	NA	NA	19.294	NA	16.8677	NA	15.9575	NA	31.3722	27.544	NA	NA	20.0796
C3L-01031-N	Normal	PDA	19.4155	15.6844	-2.41383	14.5583	NA	NA	NA	19.1263	NA	NA	NA	NA	NA	NA	NA	17.3423	NA	NA	NA	NA	17.0969	NA	NA	NA	NA	NA	18.1442	13.2738	NA	13.1714	NA	NA	NA	NA	NA	NA	NA	12.7624	NA	NA	NA	NA	30.8132	24.3214	NA	NA	19.124
C3L-01031-T	Tumor	PDA	19.3718	16.1458	-1.94993	16.3086	NA	NA	NA	18.632	NA	NA	NA	NA	NA	NA	NA	17.7751	NA	NA	NA	NA	16.3844	NA	NA	NA	NA	NA	18.8332	13.485	NA	14.287	NA	NA	NA	NA	NA	NA	NA	13.4609	NA	NA	NA	NA	31.93	24.0825	NA	NA	17.754
C3L-01036-N	Normal	PDA	NA	16.4539	NA	NA	NA	NA	NA	NA	NA	NA	NA	NA	NA	NA	NA	16.4539	NA	NA	NA	NA	NA	NA	NA	NA	NA	NA	NA	NA	NA	NA	NA	NA	NA	NA	NA	NA	NA	NA	NA	NA	NA	NA	31.286	23.7262	NA	NA	NA
C3L-01036-T	Tumor	PDA	NA	17.1815	NA	NA	NA	NA	NA	NA	NA	NA	NA	NA	NA	NA	NA	17.1815	NA	NA	NA	NA	NA	NA	NA	NA	NA	NA	NA	NA	NA	NA	NA	NA	NA	NA	NA	NA	NA	NA	NA	NA	NA	NA	31.3887	24.16	NA	NA	NA
C3L-01037-N	Normal	PDA	NA	16.0413	NA	NA	NA	NA	NA	NA	NA	NA	NA	NA	NA	NA	NA	16.0413	NA	NA	NA	NA	NA	NA	NA	NA	NA	NA	NA	NA	NA	NA	NA	NA	NA	NA	NA	NA	NA	NA	NA	NA	NA	NA	30.7124	23.4756	NA	NA	NA
C3L-01037-T	Tumor	PDA	NA	18.2409	NA	NA	NA	NA	NA	NA	NA	NA	NA	NA	NA	NA	NA	18.2409	NA	NA	NA	NA	NA	NA	NA	NA	NA	NA	NA	NA	NA	NA	NA	NA	NA	NA	NA	NA	NA	NA	NA	NA	NA	NA	32.5963	24.321	NA	NA	NA
C3L-01040-T	Tumor	GBM	NA	18.2729	NA	NA	NA	NA	NA	NA	NA	NA	NA	NA	NA	NA	NA	18.0308	NA	NA	NA	NA	19.0006	NA	NA	NA	NA	NA	18.5412	17.519	NA	NA	NA	NA	NA	NA	NA	NA	NA	NA	NA	NA	NA	NA	32.7342	24.7417	NA	NA	NA
C3L-01043-T	Tumor	GBM	18.747	17.9249	-0.134024	NA	NA	NA	NA	NA	NA	NA	NA	NA	NA	NA	NA	NA	NA	NA	NA	NA	NA	NA	NA	NA	NA	NA	21.115	19.5796	NA	NA	13.9792	NA	NA	NA	NA	NA	NA	17.0257	NA	NA	NA	NA	33.0101	25.376	NA	NA	18.9763
C3L-01045-T	Tumor	GBM	NA	17.9011	NA	NA	NA	NA	NA	19.9949	NA	NA	NA	NA	NA	NA	NA	NA	NA	NA	NA	NA	NA	16.3598	NA	NA	NA	15.7131	20.5704	18.4212	NA	NA	NA	NA	NA	NA	NA	NA	NA	NA	16.3469	NA	NA	NA	32.9645	25.7874	NA	NA	19.4371
C3L-01046-T	Tumor	GBM	NA	18.0359	NA	NA	NA	NA	NA	20.0397	NA	NA	NA	NA	NA	NA	NA	NA	NA	NA	NA	NA	NA	17.3784	NA	NA	NA	16.0932	19.9671	19.0007	NA	NA	NA	NA	NA	NA	NA	NA	NA	NA	15.7366	NA	NA	NA	33.2104	25.6769	NA	NA	19.1088
C3L-01048-T	Tumor	GBM	18.645	17.1663	-0.886552	NA	NA	NA	NA	19.7683	NA	NA	NA	NA	NA	NA	NA	18.9302	NA	15.097	NA	NA	NA	16.9276	NA	NA	NA	15.646	19.4442	18.6563	NA	NA	NA	14.5459	NA	NA	NA	NA	15.4817	NA	NA	NA	NA	NA	32.4894	25.6266	NA	16.3014	NA
C3L-01049-T	Tumor	GBM	18.8744	17.7007	-0.365658	NA	NA	NA	NA	NA	NA	14.4889	NA	NA	NA	NA	NA	20.4162	NA	NA	NA	NA	NA	NA	NA	NA	NA	17.7278	18.4145	18.4358	NA	NA	NA	NA	NA	NA	NA	NA	NA	16.7212	NA	NA	NA	NA	33.2216	25.9666	NA	NA	19.3758
C3L-01051-N	Normal	PDA	19.6516	16.084	-2.02819	15.7326	NA	NA	NA	NA	NA	NA	NA	NA	NA	NA	NA	16.1591	NA	16.8219	NA	NA	NA	NA	NA	NA	NA	NA	18.9206	15.341	NA	NA	NA	16.1369	NA	NA	NA	NA	NA	13.4759	NA	NA	NA	NA	30.8862	24.3233	NA	NA	16.7468
C3L-01051-T	Tumor	PDA	18.821	16.0953	-1.96797	15.4966	NA	NA	NA	NA	NA	NA	NA	NA	NA	NA	NA	17.0702	NA	17.0085	NA	NA	NA	NA	NA	NA	NA	NA	17.8501	15.8867	NA	NA	NA	15.9719	NA	NA	NA	NA	NA	13.3831	NA	NA	NA	NA	31.236	24.1785	NA	NA	17.8355
C3L-01052-N	Normal	PDA	NA	18.842	NA	NA	NA	NA	NA	NA	NA	NA	NA	NA	NA	NA	NA	16.5598	NA	NA	NA	NA	NA	NA	NA	NA	NA	NA	NA	NA	NA	NA	NA	NA	NA	NA	NA	NA	NA	NA	NA	21.1241	NA	NA	30.6979	23.4358	NA	NA	NA
C3L-01052-T	Tumor	PDA	NA	18.4329	NA	NA	NA	NA	NA	NA	NA	NA	NA	NA	NA	NA	NA	16.9226	NA	NA	NA	NA	NA	NA	NA	NA	NA	NA	NA	NA	NA	NA	NA	NA	NA	NA	NA	NA	NA	NA	NA	19.9431	NA	NA	31.154	23.8927	NA	NA	NA
C3L-01053-N	Normal	PDA	19.8397	16.4457	-1.67758	15.6158	NA	NA	NA	18.7624	NA	NA	NA	NA	NA	NA	NA	17.321	NA	NA	NA	NA	16.6778	NA	NA	NA	NA	NA	19.2561	15.1573	NA	14.818	NA	NA	NA	NA	NA	NA	NA	13.9571	NA	NA	NA	NA	30.9711	25.1433	NA	NA	19.256
C3L-01053-T	Tumor	PDA	19.5568	15.7333	-2.37326	15.1847	NA	NA	NA	18.3749	NA	NA	NA	NA	NA	NA	NA	17.3657	NA	NA	NA	NA	16.8228	NA	NA	NA	NA	NA	18.3269	14.0565	NA	13.1465	NA	NA	NA	NA	NA	NA	NA	12.5888	NA	NA	NA	NA	31.4915	24.2613	NA	NA	17.992
C3L-01054-N	Normal	PDA	NA	17.4672	NA	NA	NA	NA	NA	NA	NA	NA	NA	NA	NA	NA	NA	NA	NA	NA	NA	NA	17.4672	NA	NA	NA	NA	NA	NA	NA	NA	NA	NA	NA	NA	NA	NA	NA	NA	NA	NA	NA	NA	NA	31.1965	24.0825	NA	NA	18.7175
C3L-01054-T	Tumor	PDA	NA	16.2294	NA	NA	NA	NA	NA	NA	NA	NA	NA	NA	NA	NA	NA	NA	NA	NA	NA	NA	16.2294	NA	NA	NA	NA	NA	NA	NA	NA	NA	NA	NA	NA	NA	NA	NA	NA	NA	NA	NA	NA	NA	31.7759	23.7638	NA	NA	17.9775
C3L-01061-T	Tumor	GBM	NA	19.062	NA	NA	NA	NA	NA	20.5596	NA	NA	NA	NA	NA	NA	NA	NA	NA	NA	NA	NA	NA	17.8053	NA	NA	NA	17.8239	22.2301	18.9066	NA	NA	NA	NA	NA	NA	NA	NA	NA	NA	17.0466	NA	NA	NA	32.4211	26.2808	NA	NA	20.0708
C3L-01124-N	Normal	PDA	NA	17.8911	NA	NA	NA	NA	NA	NA	NA	NA	NA	NA	NA	NA	NA	17.3508	NA	NA	NA	NA	18.4313	NA	NA	NA	NA	NA	NA	NA	NA	NA	NA	NA	NA	NA	NA	NA	NA	NA	NA	NA	NA	NA	30.8333	23.7178	NA	NA	NA
C3L-01124-T	Tumor	PDA	NA	17.9058	NA	NA	NA	NA	NA	NA	NA	NA	NA	NA	NA	NA	NA	18.3805	NA	NA	NA	NA	17.4312	NA	NA	NA	NA	NA	NA	NA	NA	NA	NA	NA	NA	NA	NA	NA	NA	NA	NA	NA	NA	NA	31.9076	23.9848	NA	NA	NA
C3L-01138-T	Tumor	HNSCC	19.6776	18.367	0.253297	NA	NA	NA	NA	20.2412	NA	NA	NA	NA	NA	NA	NA	17.0787	NA	NA	NA	NA	NA	NA	NA	NA	18.2822	NA	21.0856	18.2425	NA	NA	NA	NA	NA	NA	NA	NA	16.7647	NA	16.8742	NA	NA	NA	30.934	25.72	NA	NA	21.5491
C3L-01142-T	Tumor	GBM	18.4393	17.114	-0.926753	NA	NA	NA	NA	NA	NA	NA	NA	NA	14.3735	NA	NA	NA	NA	NA	NA	NA	NA	NA	NA	NA	NA	16.2795	19.2784	18.5247	NA	NA	NA	NA	NA	NA	NA	NA	NA	NA	NA	NA	NA	NA	33.149	24.8942	NA	NA	19.4611
C3L-01146-T	Tumor	GBM	NA	17.515	NA	NA	NA	NA	NA	NA	NA	NA	NA	NA	NA	NA	NA	NA	NA	15.0045	NA	NA	NA	NA	NA	NA	NA	NA	20.6768	16.8639	NA	NA	NA	NA	NA	NA	NA	NA	NA	NA	NA	NA	NA	NA	32.8906	24.8019	NA	NA	NA
C3L-01149-T	Tumor	GBM	20.6838	19.126	0.952989	NA	NA	NA	NA	21.4475	NA	NA	NA	NA	NA	NA	NA	21.8383	NA	15.897	NA	NA	NA	18.906	NA	NA	NA	17.9618	21.2155	20.118	NA	NA	NA	16.9338	NA	NA	NA	NA	17.816	NA	NA	NA	NA	NA	31.6285	28.4528	NA	17.7693	NA
C3L-01154-T	Tumor	GBM	18.5391	18.4377	0.391052	NA	NA	NA	NA	NA	NA	NA	NA	NA	NA	NA	NA	NA	NA	NA	NA	NA	NA	NA	NA	NA	NA	NA	21.8092	20.4016	NA	NA	14.2905	NA	NA	NA	NA	NA	NA	17.2496	NA	NA	NA	NA	32.6633	25.8651	NA	NA	18.8118
C3L-01155-T	Tumor	GBM	NA	17.7437	NA	NA	NA	NA	NA	19.2348	NA	NA	NA	NA	NA	NA	NA	NA	NA	NA	NA	NA	NA	16.7756	NA	NA	NA	15.4134	20.9432	17.8358	NA	NA	NA	NA	NA	NA	NA	NA	NA	NA	16.2596	NA	NA	NA	32.4183	25.2331	NA	NA	19.1106
C3L-01156-T	Tumor	GBM	18.8724	17.5674	-0.498846	NA	NA	NA	NA	NA	NA	NA	NA	NA	NA	NA	NA	NA	NA	NA	NA	NA	NA	NA	NA	NA	NA	NA	21.3416	18.9682	NA	NA	13.5537	NA	NA	NA	NA	NA	NA	16.4062	NA	NA	NA	NA	32.6143	25.7934	NA	NA	19.3512
C3L-01157-T	Tumor	GBM	NA	17.6857	NA	NA	13.9728	NA	NA	19.4645	NA	NA	NA	NA	NA	NA	NA	NA	NA	NA	NA	NA	NA	NA	NA	NA	NA	NA	19.1741	18.1316	NA	NA	NA	NA	NA	NA	NA	NA	NA	NA	NA	NA	NA	NA	32.4742	25.11	NA	NA	NA
C3L-01237-N	Normal	HNSCC	17.6947	17.6669	-0.330038	NA	15.5184	NA	15.3036	19.3427	NA	NA	NA	NA	NA	NA	NA	NA	NA	NA	NA	NA	17.1527	NA	NA	NA	18.2778	NA	21.2205	18.5646	NA	NA	NA	19.1352	NA	NA	NA	NA	17.059	17.0962	NA	NA	NA	15.665	32.2365	25.1142	NA	NA	20.6595
C3L-01237-T	Tumor	HNSCC	20.124	18.1659	0.0259032	NA	15.1152	NA	14.757	20.691	NA	NA	NA	NA	NA	NA	NA	NA	NA	NA	NA	NA	18.5953	NA	NA	NA	18.6131	NA	21.0918	18.872	NA	NA	NA	19.1641	NA	NA	NA	NA	17.2544	18.7389	NA	NA	NA	16.9322	31.7494	25.9555	NA	NA	21.967
C3L-01246-N	Normal	UCEC	NA	18.3007	NA	NA	NA	17.5245	NA	21.6171	NA	NA	NA	NA	NA	NA	NA	NA	NA	18.0078	NA	NA	19.0953	NA	NA	NA	15.8236	NA	20.8066	19.4911	15.1074	NA	NA	18.3698	NA	NA	NA	NA	17.1636	NA	NA	NA	NA	NA	32.9572	24.8588	NA	20.1627	NA
C3L-01246-T	Tumor	UCEC	NA	19.5452	NA	NA	NA	18.4438	NA	22.9125	NA	NA	NA	NA	NA	NA	NA	NA	NA	19.0421	NA	NA	20.1059	NA	NA	NA	16.5561	NA	22.2677	21.1099	17.308	NA	NA	19.4856	NA	NA	NA	NA	18.2201	NA	NA	NA	NA	NA	32.0524	26.569	NA	21.4424	NA
C3L-01247-T	Tumor	UCEC	20.1902	19.0783	0.934426	NA	NA	17.823	NA	21.6697	NA	NA	NA	NA	18.2214	NA	NA	NA	NA	NA	NA	NA	NA	NA	NA	NA	NA	NA	19.6206	21.0075	NA	NA	NA	18.347	NA	NA	NA	NA	NA	16.8592	NA	NA	NA	NA	32.7249	25.5721	NA	20.4809	21.0101
C3L-01248-T	Tumor	UCEC	19.7302	19.4601	1.34329	NA	NA	17.6488	NA	21.2874	NA	NA	NA	NA	NA	NA	NA	NA	NA	18.5966	NA	NA	NA	NA	NA	NA	NA	NA	NA	21.4989	NA	NA	NA	18.2688	NA	NA	NA	NA	NA	NA	NA	NA	NA	NA	32.3461	24.867	NA	20.6892	NA
C3L-01249-N	Normal	UCEC	17.4989	18.9473	0.961925	NA	NA	17.6776	NA	20.6659	NA	NA	NA	NA	NA	NA	NA	NA	NA	NA	NA	NA	NA	NA	NA	NA	NA	NA	NA	20.748	NA	NA	NA	NA	NA	NA	NA	NA	NA	NA	16.6977	NA	NA	NA	33.2774	24.8103	NA	NA	NA
C3L-01249-T	Tumor	UCEC	19.7348	19.8126	1.69552	NA	NA	18.1564	NA	22.4332	NA	NA	NA	NA	NA	NA	NA	NA	NA	NA	NA	NA	19.558	NA	NA	NA	NA	NA	NA	21.6264	NA	NA	NA	NA	NA	NA	NA	NA	NA	NA	17.289	NA	NA	NA	31.9267	25.1081	NA	NA	NA
C3L-01252-N	Normal	UCEC	20.457	19.4489	1.28929	NA	NA	18.0697	NA	21.1124	NA	NA	NA	NA	NA	NA	NA	NA	NA	18.365	NA	NA	NA	NA	NA	NA	NA	NA	NA	21.3958	NA	NA	NA	18.3017	NA	NA	NA	NA	NA	NA	NA	NA	NA	NA	32.9092	25.4066	NA	20.0109	NA
C3L-01252-T	Tumor	UCEC	20.039	19.269	1.13396	NA	NA	17.7456	NA	21.1009	NA	NA	NA	NA	NA	NA	NA	NA	NA	18.2615	NA	NA	NA	NA	NA	NA	NA	NA	NA	20.6662	NA	NA	NA	18.5705	NA	NA	NA	NA	NA	NA	NA	NA	NA	NA	32.6416	25.2828	NA	20.4868	NA
C3L-01253-T	Tumor	UCEC	19.9117	18.9676	0.840069	NA	NA	18.1428	NA	21.3076	NA	NA	NA	NA	18.2928	NA	NA	NA	NA	NA	NA	NA	NA	NA	NA	NA	NA	NA	19.3789	20.5165	NA	NA	NA	18.4244	NA	NA	NA	NA	NA	16.7099	NA	NA	NA	NA	33.0684	25.2005	NA	20.2984	20.5309
C3L-01256-N	Normal	UCEC	19.9055	17.6539	-0.473258	NA	NA	17.5289	NA	21.0412	NA	NA	NA	NA	17.4562	NA	NA	16.8704	NA	18.2993	NA	NA	NA	NA	NA	NA	15.9928	NA	19.6152	21.4029	NA	NA	NA	NA	NA	NA	NA	NA	NA	NA	16.8712	NA	NA	11.4607	32.9719	25.4487	NA	20.7013	18.6006
C3L-01256-T	Tumor	UCEC	19.8752	17.8642	-0.261129	NA	NA	17.6736	NA	21.5106	NA	NA	NA	NA	17.8619	NA	NA	17.8284	NA	18.5981	NA	NA	NA	NA	NA	NA	15.9778	NA	19.6446	21.1304	NA	NA	NA	NA	NA	NA	NA	NA	NA	NA	17.1158	NA	NA	11.3011	32.8388	25.3488	NA	20.8307	19.6704
C3L-01257-N	Normal	UCEC	NA	18.2681	NA	NA	NA	17.0767	NA	21.024	NA	NA	NA	NA	NA	NA	NA	NA	NA	19.2446	NA	NA	19.0857	NA	NA	NA	15.8904	NA	20.8355	19.6898	15.0578	NA	NA	18.1901	NA	NA	NA	NA	16.5867	NA	NA	NA	NA	NA	32.8566	24.8547	NA	20.4334	NA
C3L-01257-T	Tumor	UCEC	NA	18.6868	NA	NA	NA	18.1505	NA	21.689	NA	NA	NA	NA	NA	NA	NA	NA	NA	18.3965	NA	NA	18.9492	NA	NA	NA	16.0766	NA	21.3165	20.5873	16.0844	NA	NA	18.5245	NA	NA	NA	NA	17.0933	NA	NA	NA	NA	NA	32.5933	26.3155	NA	20.3263	NA
C3L-01275-T	Tumor	UCEC	19.5616	19.7311	1.62426	NA	NA	17.9221	NA	22.6343	NA	NA	NA	NA	18.4349	NA	NA	NA	NA	18.7245	NA	NA	20.8738	NA	NA	NA	NA	NA	21.6447	NA	NA	NA	NA	NA	NA	NA	NA	NA	NA	NA	17.8837	NA	NA	NA	32.331	25.6892	NA	20.951	20.5815
C3L-01281-N	Normal	CCRCC	NA	NA	NA	NA	NA	NA	NA	NA	NA	NA	NA	NA	NA	NA	NA	NA	NA	NA	NA	NA	NA	NA	NA	NA	NA	NA	NA	NA	NA	NA	NA	NA	NA	NA	NA	NA	NA	NA	NA	NA	NA	NA	30.9043	23.0488	NA	NA	20.4111
C3L-01281-T	Tumor	CCRCC	NA	NA	NA	NA	NA	NA	NA	NA	NA	NA	NA	NA	NA	NA	NA	NA	NA	NA	NA	NA	NA	NA	NA	NA	NA	NA	NA	NA	NA	NA	NA	NA	NA	NA	NA	NA	NA	NA	NA	NA	NA	NA	31.6191	24.116	NA	NA	21.7335
C3L-01282-N	Normal	UCEC	19.496	19.1014	0.998402	NA	NA	17.3462	NA	20.6415	NA	NA	NA	NA	NA	NA	NA	NA	NA	18.4524	NA	NA	17.7195	NA	NA	NA	NA	NA	NA	21.3476	NA	NA	NA	NA	NA	NA	NA	NA	NA	NA	NA	NA	NA	NA	32.9394	24.7439	NA	20.4663	NA
C3L-01282-T	Tumor	UCEC	19.7501	19.8593	1.74136	NA	NA	17.7246	NA	22.0201	NA	NA	NA	NA	NA	NA	NA	NA	NA	19.0928	NA	NA	19.113	NA	NA	NA	NA	NA	NA	21.3462	NA	NA	NA	NA	NA	NA	NA	NA	NA	NA	NA	NA	NA	NA	31.8715	25.5185	NA	21.5622	NA
C3L-01283-T	Tumor	CCRCC	NA	NA	NA	NA	NA	NA	NA	NA	NA	NA	NA	NA	NA	NA	NA	NA	NA	NA	NA	NA	NA	NA	NA	NA	NA	NA	NA	NA	NA	NA	NA	NA	NA	NA	NA	NA	NA	NA	NA	NA	NA	NA	32.1349	23.9948	NA	NA	22.2725
C3L-01285-N	Normal	LSCC	20.7666	16.791	-1.38684	NA	16.9421	15.8059	NA	19.4974	NA	12.2441	NA	NA	NA	NA	NA	17.6738	NA	NA	NA	NA	16.6734	NA	NA	NA	18.2938	NA	16.5939	18.6775	NA	NA	NA	17.561	NA	NA	NA	NA	16.6695	NA	14.86	NA	NA	NA	31.8664	25.6434	NA	NA	19.8118
C3L-01285-T	Tumor	LSCC	23.6281	19.0489	0.702505	NA	16.7901	17.4289	NA	22.9147	NA	13.9661	NA	NA	NA	NA	NA	21.9075	NA	NA	NA	NA	19.112	NA	NA	NA	20.1104	NA	19.4793	20.9919	NA	NA	NA	19.1586	NA	NA	NA	NA	19.4761	NA	17.2513	NA	NA	NA	30.6445	28.4461	NA	NA	21.5371
C3L-01286-N	Normal	CCRCC	NA	NA	NA	NA	NA	NA	NA	NA	NA	NA	NA	NA	NA	NA	NA	NA	NA	NA	NA	NA	NA	NA	NA	NA	NA	NA	NA	NA	NA	NA	NA	NA	NA	NA	NA	NA	NA	NA	NA	NA	NA	NA	30.7204	22.8847	NA	NA	20.2162
C3L-01286-T	Tumor	CCRCC	NA	NA	NA	NA	NA	NA	NA	NA	NA	NA	NA	NA	NA	NA	NA	NA	NA	NA	NA	NA	NA	NA	NA	NA	NA	NA	NA	NA	NA	NA	NA	NA	NA	NA	NA	NA	NA	NA	NA	NA	NA	NA	32.1879	24.6094	NA	NA	21.4712
C3L-01287-N	Normal	CCRCC	NA	NA	NA	NA	NA	NA	NA	NA	NA	NA	NA	NA	NA	NA	NA	NA	NA	NA	NA	NA	NA	NA	NA	NA	NA	NA	NA	NA	NA	NA	NA	NA	NA	NA	NA	NA	NA	NA	NA	NA	NA	NA	30.4982	22.7494	NA	NA	21.4381
C3L-01287-T	Tumor	CCRCC	NA	NA	NA	NA	NA	NA	NA	NA	NA	NA	NA	NA	NA	NA	NA	NA	NA	NA	NA	NA	NA	NA	NA	NA	NA	NA	NA	NA	NA	NA	NA	NA	NA	NA	NA	NA	NA	NA	NA	NA	NA	NA	31.6795	24.7623	NA	NA	22.2468
C3L-01288-T	Tumor	CCRCC	NA	NA	NA	NA	NA	NA	NA	NA	NA	NA	NA	NA	NA	NA	NA	NA	NA	NA	NA	NA	NA	NA	NA	NA	NA	NA	NA	NA	NA	NA	NA	NA	NA	NA	NA	NA	NA	NA	NA	NA	NA	NA	31.502	23.8318	NA	NA	21.3615
C3L-01302-N	Normal	CCRCC	18.0081	15.8775	-2.13786	13.4239	NA	NA	NA	NA	NA	NA	NA	NA	NA	NA	NA	NA	NA	NA	NA	NA	15.2953	NA	NA	NA	NA	NA	17.4551	18.1978	NA	NA	NA	15.0156	NA	NA	NA	NA	NA	NA	NA	NA	NA	NA	30.6232	23.2919	NA	NA	21.2879
C3L-01302-T	Tumor	CCRCC	18.7831	15.6775	-2.38352	14.2469	NA	NA	NA	NA	NA	NA	NA	NA	NA	NA	NA	14.4274	NA	NA	NA	NA	16.1054	NA	NA	NA	NA	NA	17.5319	16.7805	NA	NA	NA	14.973	NA	NA	NA	NA	NA	NA	NA	NA	NA	NA	31.615	24.1369	NA	NA	21.809
C3L-01304-N	Normal	UCEC	19.5943	19.3263	1.21746	NA	NA	17.6935	NA	20.335	NA	NA	NA	NA	NA	NA	NA	NA	NA	18.2395	NA	NA	18.7092	NA	NA	NA	NA	NA	NA	21.6542	NA	NA	NA	NA	NA	NA	NA	NA	NA	NA	NA	NA	NA	NA	33.0917	24.6983	NA	20.5879	NA
C3L-01304-T	Tumor	UCEC	18.2472	19.4634	1.43389	NA	NA	18.0447	NA	21.2833	NA	NA	NA	NA	NA	NA	NA	NA	NA	18.2124	NA	NA	18.9393	NA	NA	NA	NA	NA	NA	20.8372	NA	NA	NA	NA	NA	NA	NA	NA	NA	NA	NA	NA	NA	NA	32.8289	24.7492	NA	20.6257	NA
C3L-01307-N	Normal	UCEC	19.5097	19.2075	1.10366	NA	NA	17.9487	NA	20.5645	NA	NA	NA	NA	NA	NA	NA	NA	NA	18.4825	NA	NA	18.0828	NA	NA	NA	NA	NA	NA	20.9589	NA	NA	NA	NA	NA	NA	NA	NA	NA	NA	NA	NA	NA	NA	32.8131	24.8174	NA	20.5913	NA
C3L-01307-T	Tumor	UCEC	19.4849	20.1727	2.07029	NA	NA	18.2176	NA	22.6363	NA	NA	NA	NA	NA	NA	NA	NA	NA	19.2321	NA	NA	19.9601	NA	NA	NA	NA	NA	NA	20.8171	NA	NA	NA	NA	NA	NA	NA	NA	NA	NA	NA	NA	NA	NA	31.6841	25.5878	NA	21.0281	NA
C3L-01311-N	Normal	UCEC	19.5415	17.4396	-0.666118	NA	NA	17.2907	NA	21.0496	NA	NA	NA	NA	17.1492	NA	NA	16.9446	NA	18.0782	NA	NA	NA	NA	NA	NA	15.8946	NA	19.2023	20.7503	NA	NA	NA	NA	NA	NA	NA	NA	NA	NA	16.5647	NA	NA	11.4715	32.9181	25.2328	NA	20.3097	19.8602
C3L-01311-T	Tumor	UCEC	19.57	18.5047	0.397364	NA	NA	17.889	NA	22.1009	NA	NA	NA	NA	18.7549	NA	NA	18.8799	NA	18.6419	NA	NA	NA	NA	NA	NA	16.074	NA	20.1069	21.3611	NA	NA	NA	NA	NA	NA	NA	NA	NA	NA	17.5955	NA	NA	13.6433	32.1875	25.8427	NA	20.1558	20.5403
C3L-01312-T	Tumor	UCEC	NA	18.4437	NA	NA	NA	NA	NA	21.3782	NA	NA	NA	17.5767	NA	NA	NA	NA	NA	18.6467	NA	NA	NA	NA	NA	NA	NA	NA	17.324	17.293	NA	NA	NA	NA	NA	NA	NA	NA	NA	NA	NA	NA	NA	NA	32.7233	24.5679	NA	20.4564	20.7868
C3L-01313-N	Normal	CCRCC	NA	NA	NA	NA	NA	NA	NA	NA	NA	NA	NA	NA	NA	NA	NA	NA	NA	NA	NA	NA	NA	NA	NA	NA	NA	NA	NA	NA	NA	NA	NA	NA	NA	NA	NA	NA	NA	NA	NA	NA	NA	NA	30.7531	22.7213	NA	NA	20.8335
C3L-01313-T	Tumor	CCRCC	NA	NA	NA	NA	NA	NA	NA	NA	NA	NA	NA	NA	NA	NA	NA	NA	NA	NA	NA	NA	NA	NA	NA	NA	NA	NA	NA	NA	NA	NA	NA	NA	NA	NA	NA	NA	NA	NA	NA	NA	NA	NA	31.6552	24.3734	NA	NA	21.6016
C3L-01327-T	Tumor	GBM	NA	19.1972	NA	NA	NA	NA	NA	NA	NA	NA	NA	NA	NA	NA	NA	18.4527	NA	NA	NA	NA	19.2836	NA	NA	NA	NA	NA	19.9279	19.1247	NA	NA	NA	NA	NA	NA	NA	NA	NA	NA	NA	NA	NA	NA	32.7784	25.714	NA	NA	NA
C3L-01328-T	Tumor	PDA	NA	18.1969	NA	NA	NA	NA	NA	18.8642	NA	NA	NA	NA	NA	NA	NA	18.4471	NA	NA	NA	NA	17.2794	NA	NA	NA	NA	NA	NA	NA	NA	NA	NA	NA	NA	NA	NA	NA	NA	NA	NA	NA	NA	NA	32.1174	24.4159	NA	NA	NA
C3L-01330-N	Normal	LUAD	NA	16.8957	NA	NA	NA	15.8212	NA	16.6798	NA	NA	NA	NA	NA	NA	NA	16.3661	NA	15.7004	NA	NA	17.1333	NA	NA	NA	17.9977	NA	18.5899	16.8772	NA	NA	NA	NA	NA	NA	NA	NA	NA	NA	NA	NA	NA	NA	32.1168	24.6162	NA	NA	20.2955
C3L-01330-T	Tumor	LUAD	21.1976	17.238	-0.965221	NA	NA	15.8305	NA	17.504	NA	NA	NA	NA	NA	NA	NA	17.7752	NA	15.7668	NA	NA	17.7726	NA	NA	NA	17.3738	NA	18.5359	17.3453	NA	NA	NA	NA	NA	NA	NA	NA	NA	NA	NA	NA	NA	NA	31.7688	24.5431	NA	NA	19.9744
C3L-01352-T	Tumor	CCRCC	NA	NA	NA	NA	NA	NA	NA	NA	NA	NA	NA	NA	NA	NA	NA	NA	NA	NA	NA	NA	NA	NA	NA	NA	NA	NA	NA	NA	NA	NA	NA	NA	NA	NA	NA	NA	NA	NA	NA	NA	NA	NA	31.9331	23.8957	NA	NA	22.3632
C3L-01453-N	Normal	PDA	NA	NA	NA	NA	NA	NA	NA	NA	NA	NA	NA	NA	NA	NA	NA	NA	NA	NA	NA	NA	NA	NA	NA	NA	NA	NA	NA	NA	NA	NA	NA	NA	NA	NA	NA	NA	NA	NA	NA	NA	NA	NA	32.1971	23.784	NA	NA	NA
C3L-01453-T	Tumor	PDA	NA	NA	NA	NA	NA	NA	NA	NA	NA	NA	NA	NA	NA	NA	NA	NA	NA	NA	NA	NA	NA	NA	NA	NA	NA	NA	NA	NA	NA	NA	NA	NA	NA	NA	NA	NA	NA	NA	NA	NA	NA	NA	32.5721	23.8578	NA	NA	NA
C3L-01455-N	Normal	LSCC	21.0266	18.0995	-0.09371	NA	16.8895	NA	NA	19.7465	NA	NA	NA	NA	NA	NA	NA	17.9003	NA	NA	NA	NA	17.568	NA	NA	NA	18.113	NA	19.1654	18.5109	NA	NA	NA	17.8372	NA	NA	NA	NA	17.1643	NA	NA	NA	NA	NA	31.9402	25.5095	NA	18.4306	19.925
C3L-01455-T	Tumor	LSCC	21.6663	19.1107	0.879866	NA	16.6675	NA	NA	20.7151	NA	NA	NA	NA	NA	NA	NA	20.4806	NA	NA	NA	NA	19.0638	NA	NA	NA	19.0625	NA	20.0899	19.7662	NA	NA	NA	17.9437	NA	NA	NA	NA	18.2072	NA	NA	NA	NA	NA	31.5663	26.2676	NA	18.5623	20.3099
C3L-01553-T	Tumor	CCRCC	NA	NA	NA	NA	NA	NA	NA	NA	NA	NA	NA	NA	NA	NA	NA	NA	NA	NA	NA	NA	NA	NA	NA	NA	NA	NA	NA	NA	NA	NA	NA	NA	NA	NA	NA	NA	NA	NA	NA	NA	NA	NA	31.4928	23.941	NA	NA	21.9931
C3L-01557-T	Tumor	CCRCC	NA	NA	NA	NA	NA	NA	NA	NA	NA	NA	NA	NA	NA	NA	NA	NA	NA	NA	NA	NA	NA	NA	NA	NA	NA	NA	NA	NA	NA	NA	NA	NA	NA	NA	NA	NA	NA	NA	NA	NA	NA	NA	31.8643	23.8095	NA	NA	21.4908
C3L-01560-T	Tumor	CCRCC	NA	NA	NA	NA	NA	NA	NA	NA	NA	NA	NA	NA	NA	NA	NA	NA	NA	NA	NA	NA	NA	NA	NA	NA	NA	NA	NA	NA	NA	NA	NA	NA	NA	NA	NA	NA	NA	NA	NA	NA	NA	NA	31.3124	24.0977	NA	NA	21.3753
C3L-01598-N	Normal	PDA	NA	NA	NA	NA	NA	NA	NA	NA	NA	NA	NA	NA	NA	NA	NA	NA	NA	NA	NA	NA	NA	NA	NA	NA	NA	NA	NA	NA	NA	NA	NA	NA	NA	NA	NA	NA	NA	NA	NA	NA	NA	NA	30.9677	23.8485	NA	NA	NA
C3L-01598-T	Tumor	PDA	NA	NA	NA	NA	NA	NA	NA	NA	NA	NA	NA	NA	NA	NA	NA	NA	NA	NA	NA	NA	NA	NA	NA	NA	NA	NA	NA	NA	NA	NA	NA	NA	NA	NA	NA	NA	NA	NA	NA	NA	NA	NA	32.282	23.8942	NA	NA	NA
C3L-01603-N	Normal	CCRCC	NA	NA	NA	NA	NA	NA	NA	NA	NA	NA	NA	NA	NA	NA	NA	NA	NA	NA	NA	NA	NA	NA	NA	NA	NA	NA	NA	NA	NA	NA	NA	NA	NA	NA	NA	NA	NA	NA	NA	NA	NA	NA	30.3013	23.0962	NA	NA	21.225
C3L-01603-T	Tumor	CCRCC	NA	NA	NA	NA	NA	NA	NA	NA	NA	NA	NA	NA	NA	NA	NA	NA	NA	NA	NA	NA	NA	NA	NA	NA	NA	NA	NA	NA	NA	NA	NA	NA	NA	NA	NA	NA	NA	NA	NA	NA	NA	NA	31.4872	23.9342	NA	NA	21.667
C3L-01606-N	Normal	LSCC	20.6107	18.2181	0.0493933	NA	NA	NA	NA	NA	NA	NA	NA	NA	NA	NA	NA	19.0431	NA	NA	NA	NA	17.8666	NA	NA	NA	NA	NA	18.8195	18.1546	NA	NA	NA	17.8499	NA	NA	NA	NA	17.5748	NA	NA	NA	NA	NA	31.7031	25.1927	NA	NA	20.8747
C3L-01606-T	Tumor	LSCC	20.6707	19.626	1.45383	NA	NA	NA	NA	NA	NA	NA	NA	NA	NA	NA	NA	21.614	NA	NA	NA	NA	19.468	NA	NA	NA	NA	NA	20.1953	20.4534	NA	NA	NA	18.1132	NA	NA	NA	NA	17.9123	NA	NA	NA	NA	NA	31.0936	26.5658	NA	NA	20.0155
C3L-01607-N	Normal	CCRCC	NA	NA	NA	NA	NA	NA	NA	NA	NA	NA	NA	NA	NA	NA	NA	NA	NA	NA	NA	NA	NA	NA	NA	NA	NA	NA	NA	NA	NA	NA	NA	NA	NA	NA	NA	NA	NA	NA	NA	NA	NA	NA	31.4434	23.3218	NA	NA	20.1411
C3L-01607-T	Tumor	CCRCC	NA	NA	NA	NA	NA	NA	NA	NA	NA	NA	NA	NA	NA	NA	NA	NA	NA	NA	NA	NA	NA	NA	NA	NA	NA	NA	NA	NA	NA	NA	NA	NA	NA	NA	NA	NA	NA	NA	NA	NA	NA	NA	32.0112	23.9047	NA	NA	22.2214
C3L-01632-N	Normal	LUAD	21.4175	16.9859	-1.23034	NA	NA	15.7919	NA	NA	NA	NA	NA	NA	NA	NA	NA	NA	NA	15.8551	NA	NA	17.4042	NA	NA	NA	17.7855	NA	NA	18.0926	NA	NA	NA	NA	NA	NA	NA	NA	NA	NA	NA	NA	NA	NA	32.0093	24.7821	NA	NA	20.1577
C3L-01632-T	Tumor	LUAD	22.222	17.4956	-0.767948	NA	NA	15.7001	NA	NA	NA	NA	NA	NA	NA	NA	NA	18.0758	NA	16.07	NA	NA	19.0133	NA	NA	NA	17.7622	NA	NA	18.3524	NA	NA	NA	NA	NA	NA	NA	NA	NA	NA	NA	NA	NA	NA	31.608	24.9087	NA	NA	19.8067
C3L-01637-N	Normal	PDA	NA	18.9473	NA	NA	NA	NA	NA	NA	NA	NA	NA	NA	NA	NA	NA	16.9529	NA	NA	NA	NA	NA	NA	NA	NA	NA	NA	NA	NA	NA	NA	NA	NA	NA	NA	NA	NA	NA	NA	NA	20.9416	NA	NA	31.382	24.406	NA	NA	NA
C3L-01637-T	Tumor	PDA	NA	19.1228	NA	NA	NA	NA	NA	NA	NA	NA	NA	NA	NA	NA	NA	18.2227	NA	NA	NA	NA	NA	NA	NA	NA	NA	NA	NA	NA	NA	NA	NA	NA	NA	NA	NA	NA	NA	NA	NA	20.0228	NA	NA	31.3265	24.3955	NA	NA	NA
C3L-01662-T	Tumor	PDA	18.2404	17.9105	-0.118609	NA	NA	NA	NA	NA	NA	NA	NA	NA	NA	NA	NA	17.9105	NA	NA	NA	NA	NA	NA	NA	NA	NA	NA	NA	NA	NA	NA	NA	NA	NA	NA	NA	NA	NA	NA	NA	NA	NA	NA	30.8196	24.4569	NA	NA	16.7931
C3L-01663-N	Normal	LSCC	20.6518	17.6852	-0.485891	15.1225	NA	NA	NA	19.0919	NA	NA	NA	NA	NA	NA	NA	17.1228	NA	NA	NA	NA	17.6084	NA	NA	NA	18.1766	NA	19.2229	18.0832	NA	NA	NA	NA	NA	NA	NA	NA	17.0533	NA	NA	NA	NA	NA	32.1877	25.0963	NA	17.8097	20.5707
C3L-01663-T	Tumor	LSCC	21.3476	19.5803	1.36821	17.1801	NA	NA	NA	20.7799	NA	NA	NA	NA	NA	NA	NA	21.118	NA	NA	NA	NA	19.9941	NA	NA	NA	19.0477	NA	20.7546	19.8068	NA	NA	NA	NA	NA	NA	NA	NA	17.9612	NA	NA	NA	NA	NA	31.6644	26.3967	NA	18.7924	20.0924
C3L-01682-N	Normal	LUAD	21.6107	16.4917	-1.7359	NA	NA	16.006	NA	NA	NA	NA	NA	NA	NA	NA	NA	NA	NA	15.8657	NA	NA	NA	NA	NA	NA	17.6368	NA	18.9095	18.4149	NA	NA	NA	NA	12.1172	NA	NA	NA	NA	NA	NA	NA	NA	NA	32.147	24.7382	NA	NA	20.1854
C3L-01682-T	Tumor	LUAD	22.0481	16.5388	-1.71454	NA	NA	15.5422	NA	NA	NA	NA	NA	NA	NA	NA	NA	NA	NA	15.7172	NA	NA	NA	NA	NA	NA	17.4648	NA	19.284	18.6183	NA	NA	NA	NA	12.6064	NA	NA	NA	NA	NA	NA	NA	NA	NA	31.7418	24.9561	NA	NA	19.8794
C3L-01683-N	Normal	LUAD	21.5685	14.9377	-3.28736	NA	NA	NA	NA	NA	NA	NA	NA	NA	NA	NA	NA	16.8303	NA	NA	NA	NA	NA	NA	NA	NA	NA	NA	NA	NA	NA	NA	NA	NA	NA	NA	NA	NA	NA	13.0452	NA	NA	NA	NA	32.3825	24.2124	NA	NA	NA
C3L-01683-T	Tumor	LUAD	22.0835	16.6866	-1.56886	NA	NA	NA	NA	NA	NA	NA	NA	NA	NA	NA	NA	19.4118	NA	NA	NA	NA	NA	NA	NA	NA	NA	NA	NA	NA	NA	NA	NA	NA	NA	NA	NA	NA	NA	13.9613	NA	NA	NA	NA	32.4176	25.0641	NA	NA	NA
C3L-01687-N	Normal	PDA	19.0397	18.2109	0.134782	NA	NA	NA	NA	18.5873	NA	NA	NA	NA	NA	NA	NA	NA	NA	16.1987	NA	NA	17.086	NA	NA	NA	NA	NA	19.1126	NA	NA	NA	NA	17.0436	NA	NA	NA	NA	NA	NA	NA	21.2374	NA	NA	31.4472	24.5685	NA	NA	NA
C3L-01687-T	Tumor	PDA	18.9769	17.7187	-0.353697	NA	NA	NA	NA	18.2868	NA	NA	NA	NA	NA	NA	NA	NA	NA	16.1955	NA	NA	16.7233	NA	NA	NA	NA	NA	18.5209	NA	NA	NA	NA	16.4334	NA	NA	NA	NA	NA	NA	NA	20.1524	NA	NA	31.6931	24.1841	NA	NA	NA
C3L-01689-N	Normal	PDA	NA	17.5335	NA	NA	NA	NA	NA	NA	NA	NA	NA	NA	NA	NA	NA	17.5335	NA	NA	NA	NA	NA	NA	NA	NA	NA	NA	NA	NA	NA	NA	NA	NA	NA	NA	NA	NA	NA	NA	NA	NA	NA	NA	31.3361	24.31	NA	NA	NA
C3L-01689-T	Tumor	PDA	NA	17.7757	NA	NA	NA	NA	NA	NA	NA	NA	NA	NA	NA	NA	NA	17.7757	NA	NA	NA	NA	NA	NA	NA	NA	NA	NA	NA	NA	NA	NA	NA	NA	NA	NA	NA	NA	NA	NA	NA	NA	NA	NA	32.0369	24.4048	NA	NA	NA
C3L-01703-T	Tumor	PDA	NA	16.7763	NA	NA	NA	NA	NA	NA	NA	NA	NA	NA	NA	NA	NA	16.6461	NA	NA	NA	NA	16.9065	NA	NA	NA	NA	NA	NA	NA	NA	NA	NA	NA	NA	NA	NA	NA	NA	NA	NA	NA	NA	NA	32.4776	23.9719	NA	NA	NA
C3L-01744-N	Normal	UCEC	19.9907	17.6594	-0.472783	NA	NA	17.8957	NA	20.3097	NA	NA	NA	NA	17.7006	NA	NA	NA	NA	18.3583	NA	NA	NA	NA	NA	NA	16.0325	NA	18.6778	20.9894	NA	NA	NA	NA	NA	NA	NA	NA	NA	NA	16.8584	NA	NA	12.1121	33.0239	25.1729	NA	20.798	19.3658
C3L-01744-T	Tumor	UCEC	19.6954	19.3131	1.19834	NA	NA	18.5579	NA	22.7205	NA	NA	NA	NA	19.7759	NA	NA	19.6341	NA	19.8684	NA	NA	NA	NA	NA	NA	16.7136	NA	20.6376	21.2937	NA	NA	NA	NA	NA	NA	NA	NA	NA	NA	18.8414	NA	NA	15.0879	30.9353	27.1451	NA	21.0672	18.6334
C3L-01834-T	Tumor	GBM	18.719	16.7974	-1.25983	NA	NA	NA	NA	NA	NA	NA	NA	NA	14.1269	NA	NA	NA	NA	NA	NA	NA	NA	NA	NA	NA	NA	15.7124	19.3578	17.9926	NA	NA	NA	NA	NA	NA	NA	NA	NA	NA	NA	NA	NA	NA	32.5178	24.8705	NA	NA	19.8361
C3L-01836-N	Normal	CCRCC	NA	NA	NA	NA	NA	NA	NA	NA	NA	NA	NA	NA	NA	NA	NA	NA	NA	NA	NA	NA	NA	NA	NA	NA	NA	NA	NA	NA	NA	NA	NA	NA	NA	NA	NA	NA	NA	NA	NA	NA	NA	NA	30.427	23.0272	NA	NA	20.519
C3L-01836-T	Tumor	CCRCC	NA	NA	NA	NA	NA	NA	NA	NA	NA	NA	NA	NA	NA	NA	NA	NA	NA	NA	NA	NA	NA	NA	NA	NA	NA	NA	NA	NA	NA	NA	NA	NA	NA	NA	NA	NA	NA	NA	NA	NA	NA	NA	31.67	23.9503	NA	NA	21.3191
C3L-01838-T	Tumor	LSCC	21.032	18.9118	0.718314	NA	NA	16.274	NA	19.8657	NA	NA	NA	NA	NA	NA	NA	19.9193	NA	19.6858	NA	NA	NA	NA	NA	NA	19.6274	NA	NA	19.448	NA	NA	NA	17.5624	NA	NA	NA	NA	NA	NA	NA	NA	NA	NA	31.6141	25.6234	NA	NA	19.858
C3L-01861-N	Normal	CCRCC	NA	NA	NA	NA	NA	NA	NA	NA	NA	NA	NA	NA	NA	NA	NA	NA	NA	NA	NA	NA	NA	NA	NA	NA	NA	NA	NA	NA	NA	NA	NA	NA	NA	NA	NA	NA	NA	NA	NA	NA	NA	NA	30.4865	22.9094	NA	NA	20.3792
C3L-01861-T	Tumor	CCRCC	NA	NA	NA	NA	NA	NA	NA	NA	NA	NA	NA	NA	NA	NA	NA	NA	NA	NA	NA	NA	NA	NA	NA	NA	NA	NA	NA	NA	NA	NA	NA	NA	NA	NA	NA	NA	NA	NA	NA	NA	NA	NA	32.0269	23.6953	NA	NA	21.656
C3L-01862-T	Tumor	LUAD	21.9768	19.67	1.42083	NA	NA	NA	NA	NA	NA	NA	NA	NA	NA	NA	NA	19.5915	NA	NA	NA	NA	20.449	NA	NA	NA	18.8895	NA	20.2818	19.138	NA	NA	NA	NA	NA	NA	NA	NA	NA	NA	NA	NA	NA	NA	31.4225	25.051	NA	NA	19.6133
C3L-01882-N	Normal	CCRCC	NA	NA	NA	NA	NA	NA	NA	NA	NA	NA	NA	NA	NA	NA	NA	NA	NA	NA	NA	NA	NA	NA	NA	NA	NA	NA	NA	NA	NA	NA	NA	NA	NA	NA	NA	NA	NA	NA	NA	NA	NA	NA	30.1429	22.6557	NA	NA	20.4858
C3L-01882-T	Tumor	CCRCC	NA	NA	NA	NA	NA	NA	NA	NA	NA	NA	NA	NA	NA	NA	NA	NA	NA	NA	NA	NA	NA	NA	NA	NA	NA	NA	NA	NA	NA	NA	NA	NA	NA	NA	NA	NA	NA	NA	NA	NA	NA	NA	31.6784	23.9363	NA	NA	22.2835
C3L-01884-N	Normal	LSCC	21.1145	16.9286	-1.26974	NA	NA	NA	NA	18.9425	NA	NA	NA	NA	NA	NA	12.8273	17.9128	NA	18.4549	NA	NA	17.927	NA	NA	NA	NA	NA	NA	18.5538	NA	NA	NA	NA	NA	NA	NA	NA	16.8254	13.9852	NA	NA	NA	NA	32.1116	25.0293	NA	NA	20.3458
C3L-01884-T	Tumor	LSCC	21.56	18.4872	0.262584	NA	NA	NA	NA	21.2061	NA	NA	NA	NA	NA	NA	14.3532	21.1244	NA	19.9361	NA	NA	19.2908	NA	NA	NA	NA	NA	NA	19.7902	NA	NA	NA	NA	NA	NA	NA	NA	18.6007	13.5959	NA	NA	NA	NA	30.6592	26.3208	NA	NA	21.5501
C3L-01885-N	Normal	CCRCC	18.0127	14.5596	-3.45609	NA	NA	NA	NA	NA	NA	NA	NA	NA	NA	NA	NA	13.3304	NA	NA	NA	NA	NA	NA	NA	NA	NA	NA	17.6111	15.9511	NA	NA	NA	NA	13.0455	NA	NA	NA	12.8596	NA	NA	NA	NA	NA	30.3828	23.3077	NA	NA	20.4392
C3L-01885-T	Tumor	CCRCC	19.3678	15.2914	-2.80403	NA	NA	NA	NA	NA	NA	NA	NA	NA	NA	NA	NA	14.4735	NA	NA	NA	NA	NA	NA	NA	NA	NA	NA	17.7775	16.0219	NA	NA	NA	NA	14.6292	NA	NA	NA	13.5552	NA	NA	NA	NA	NA	31.9101	24.4214	NA	NA	21.8732
C3L-01887-T	Tumor	GBM	18.8724	18.6477	0.581407	NA	NA	NA	NA	NA	NA	NA	NA	NA	NA	NA	NA	NA	NA	NA	NA	NA	19.4888	NA	NA	NA	NA	16.8831	21.4071	18.6506	NA	NA	NA	NA	NA	NA	NA	NA	NA	16.8089	NA	NA	NA	NA	31.7894	25.7204	NA	16.52	NA
C3L-01889-N	Normal	LUAD	21.1879	17.9171	-0.285596	NA	NA	NA	NA	NA	NA	NA	NA	NA	NA	NA	NA	16.8408	NA	NA	NA	NA	18.1389	NA	NA	NA	NA	NA	18.7715	NA	NA	NA	NA	NA	NA	NA	NA	NA	NA	NA	NA	NA	NA	NA	32.5135	24.3839	NA	NA	20.1141
C3L-01889-T	Tumor	LUAD	21.0769	18.0388	-0.157381	NA	NA	NA	NA	NA	NA	NA	NA	NA	NA	NA	NA	17.37	NA	NA	NA	NA	18.2254	NA	NA	NA	NA	NA	18.5209	NA	NA	NA	NA	NA	NA	NA	NA	NA	NA	NA	NA	NA	NA	NA	31.5353	24.2647	NA	NA	19.8064
C3L-01890-N	Normal	LUAD	22.8706	17.3645	-0.937322	NA	NA	NA	NA	NA	NA	NA	NA	NA	NA	NA	NA	16.8286	NA	NA	NA	NA	17.5283	NA	NA	NA	17.7365	NA	NA	NA	NA	NA	NA	NA	NA	NA	NA	NA	NA	NA	NA	NA	NA	NA	31.9646	24.4114	NA	NA	19.861
C3L-01890-T	Tumor	LUAD	21.6672	17.8865	-0.344425	NA	NA	NA	NA	NA	NA	NA	NA	NA	NA	NA	NA	17.3456	NA	NA	NA	NA	18.2501	NA	NA	NA	18.0637	NA	NA	NA	NA	NA	NA	NA	NA	NA	NA	NA	NA	NA	NA	NA	NA	NA	31.5335	24.6082	NA	NA	19.9324
C3L-01924-N	Normal	LUAD	21.4103	14.7868	-3.42902	NA	NA	NA	NA	NA	NA	NA	NA	NA	NA	NA	NA	16.6912	NA	NA	NA	NA	NA	NA	NA	NA	NA	NA	NA	NA	NA	NA	NA	NA	NA	NA	NA	NA	NA	12.8823	NA	NA	NA	NA	32.263	24.0203	NA	NA	NA
C3L-01924-T	Tumor	LUAD	21.3643	15.6832	-2.52988	NA	NA	NA	NA	NA	NA	NA	NA	NA	NA	NA	NA	18.4921	NA	NA	NA	NA	NA	NA	NA	NA	NA	NA	NA	NA	NA	NA	NA	NA	NA	NA	NA	NA	NA	12.8743	NA	NA	NA	NA	31.6334	24.938	NA	NA	NA
C3L-01925-T	Tumor	UCEC	NA	18.6354	NA	14.9743	NA	NA	NA	NA	NA	NA	NA	NA	NA	NA	NA	NA	NA	NA	NA	NA	18.9872	NA	NA	NA	NA	NA	21.7997	21.1555	17.0058	NA	NA	NA	NA	NA	NA	NA	17.8898	NA	NA	NA	NA	NA	31.9731	26.7894	NA	21.3159	NA
C3L-01971-N	Normal	PDA	NA	16.6316	NA	NA	NA	NA	NA	NA	NA	NA	NA	NA	NA	NA	NA	17.907	NA	16.8137	NA	NA	NA	NA	NA	NA	NA	NA	18.2868	NA	NA	NA	NA	16.3391	NA	NA	NA	NA	NA	13.8113	NA	NA	NA	NA	30.9869	24.1223	NA	NA	NA
C3L-01971-T	Tumor	PDA	NA	16.3572	NA	NA	NA	NA	NA	NA	NA	NA	NA	NA	NA	NA	NA	16.7456	NA	16.4532	NA	NA	NA	NA	NA	NA	NA	NA	18.8388	NA	NA	NA	NA	16.2065	NA	NA	NA	NA	NA	13.5421	NA	NA	NA	NA	31.3859	24.3083	NA	NA	NA
C3L-02041-T	Tumor	GBM	NA	17.629	NA	NA	NA	NA	NA	18.8426	NA	NA	NA	NA	NA	NA	NA	NA	NA	NA	NA	NA	NA	16.999	NA	NA	NA	15.5828	20.986	17.589	NA	NA	NA	NA	NA	NA	NA	NA	NA	NA	15.7748	NA	NA	NA	34.2806	24.7657	NA	NA	19.4907
C3L-02109-T	Tumor	PDA	NA	NA	NA	NA	NA	NA	NA	NA	NA	NA	NA	NA	NA	NA	NA	NA	NA	NA	NA	NA	NA	NA	NA	NA	NA	NA	NA	NA	NA	NA	NA	NA	NA	NA	NA	NA	NA	NA	NA	NA	NA	NA	32.5221	23.1857	NA	NA	NA
C3L-02112-T	Tumor	PDA	18.42	16.3728	-1.66683	NA	NA	NA	NA	NA	NA	NA	NA	NA	NA	NA	NA	17.5046	NA	NA	NA	NA	NA	NA	NA	NA	NA	NA	18.3741	14.7698	NA	NA	NA	14.8428	NA	NA	NA	NA	NA	NA	NA	NA	NA	NA	31.3864	24.0565	NA	NA	17.2189
C3L-02115-N	Normal	PDA	19.465	18.2398	0.138613	NA	NA	NA	NA	18.2398	NA	NA	NA	NA	NA	NA	NA	NA	NA	NA	NA	NA	NA	NA	NA	NA	NA	NA	NA	NA	NA	NA	NA	NA	NA	NA	NA	NA	NA	NA	NA	NA	NA	NA	30.8063	24.0093	NA	NA	NA
C3L-02115-T	Tumor	PDA	19.1378	18.4203	0.338372	NA	NA	NA	NA	18.4203	NA	NA	NA	NA	NA	NA	NA	NA	NA	NA	NA	NA	NA	NA	NA	NA	NA	NA	NA	NA	NA	NA	NA	NA	NA	NA	NA	NA	NA	NA	NA	NA	NA	NA	30.8482	24.3117	NA	NA	NA
C3L-02116-T	Tumor	PDA	NA	18.367	NA	NA	NA	NA	NA	18.3248	NA	NA	NA	NA	NA	NA	NA	17.9217	NA	NA	NA	NA	NA	NA	NA	NA	NA	NA	18.8544	NA	NA	NA	NA	NA	NA	NA	NA	NA	NA	NA	NA	NA	NA	NA	32.3287	24.0589	NA	NA	NA
C3L-02118-T	Tumor	PDA	NA	18.8245	NA	NA	NA	NA	NA	NA	NA	NA	NA	NA	NA	NA	NA	18.8245	NA	NA	NA	NA	NA	NA	NA	NA	NA	NA	NA	NA	NA	NA	NA	NA	NA	NA	NA	NA	NA	NA	NA	NA	NA	NA	31.6011	24.5965	NA	NA	NA
C3L-02127-N	Normal	LSCC	20.0156	17.6433	-0.490293	NA	NA	NA	NA	19.4532	NA	NA	NA	NA	NA	NA	NA	18.1801	NA	NA	NA	NA	NA	NA	NA	NA	NA	NA	16.4363	NA	NA	NA	NA	NA	NA	NA	NA	NA	16.5038	NA	NA	NA	NA	NA	31.9997	24.8877	NA	NA	20.0213
C3L-02127-T	Tumor	LSCC	22.8237	19.451	1.152	NA	NA	NA	NA	22.0096	NA	NA	NA	NA	NA	NA	NA	21.5024	NA	NA	NA	NA	NA	NA	NA	NA	NA	NA	18.7481	21.2318	NA	NA	NA	14.9951	NA	NA	NA	NA	18.2191	NA	NA	NA	NA	NA	31.2183	26.8717	NA	NA	21.0659
C3L-02130-N	Normal	LSCC	21.6313	17.8972	-0.331592	15.2672	NA	NA	NA	19.4238	NA	NA	NA	NA	NA	NA	NA	18.1865	NA	NA	NA	NA	17.624	NA	NA	NA	18.0606	NA	19.9086	18.3811	NA	NA	NA	16.9779	NA	NA	NA	NA	17.245	NA	NA	NA	NA	NA	32.1199	24.9631	NA	NA	20.9359
C3L-02130-T	Tumor	LSCC	22.0498	19.6863	1.43285	17.8673	NA	NA	NA	21.3806	NA	NA	NA	NA	NA	NA	NA	21.324	NA	NA	NA	NA	19.546	NA	NA	NA	19.2312	NA	20.8043	20.2597	NA	NA	NA	18.1858	NA	NA	NA	NA	18.5778	NA	NA	NA	NA	NA	31.3685	25.9506	NA	NA	20.6446
C3L-02163-N	Normal	LSCC	19.943	18.2719	0.142533	NA	NA	NA	NA	NA	NA	NA	NA	NA	NA	NA	NA	18.1677	NA	18.5121	NA	NA	17.5916	NA	NA	NA	NA	NA	19.2196	18.3222	NA	NA	NA	NA	NA	NA	NA	NA	17.8181	NA	NA	NA	NA	NA	32.0805	24.758	NA	NA	20.5719
C3L-02163-T	Tumor	LSCC	21.5645	19.381	1.15616	NA	NA	NA	NA	NA	NA	NA	NA	NA	NA	NA	NA	20.4378	NA	19.1168	NA	NA	19.1658	NA	NA	NA	NA	NA	20.1984	19.678	NA	NA	NA	NA	NA	NA	NA	NA	17.6892	NA	NA	NA	NA	NA	30.8234	26.6076	NA	NA	19.9433
C3L-02164-N	Normal	LSCC	19.8694	17.968	-0.156998	NA	NA	NA	NA	NA	NA	NA	NA	NA	NA	NA	NA	18.0035	NA	NA	NA	NA	17.747	NA	NA	NA	NA	NA	19.7292	17.9116	NA	NA	NA	17.1179	NA	NA	NA	NA	17.2989	NA	NA	NA	NA	NA	31.7539	25.2626	NA	NA	20.4414
C3L-02164-T	Tumor	LSCC	20.5191	18.9546	0.791279	NA	NA	NA	NA	NA	NA	NA	NA	NA	NA	NA	NA	19.9208	NA	NA	NA	NA	18.7535	NA	NA	NA	NA	NA	19.6445	19.7852	NA	NA	NA	17.6611	NA	NA	NA	NA	17.9622	NA	NA	NA	NA	NA	31.8272	25.5404	NA	NA	20.0258
C3L-02168-N	Normal	LSCC	20.4443	17.2624	-0.896487	NA	16.5045	15.8007	NA	19.5306	NA	NA	NA	NA	NA	NA	NA	18.2682	NA	NA	NA	NA	NA	NA	NA	NA	18.3763	NA	19.1234	20.0127	NA	NA	NA	NA	NA	NA	NA	NA	16.7705	NA	14.4243	NA	13.8126	NA	32.1538	25.2296	NA	NA	20.8036
C3L-02168-T	Tumor	LSCC	22.4355	18.4765	0.200311	NA	16.9424	16.5425	NA	21.5802	NA	NA	NA	NA	NA	NA	NA	20.4591	NA	NA	NA	NA	NA	NA	NA	NA	18.9448	NA	21.1502	20.479	NA	NA	NA	NA	NA	NA	NA	NA	18.684	NA	15.9214	NA	14.0611	NA	31.6545	26.6855	NA	NA	19.682
C3L-02170-T	Tumor	LSCC	21.6905	17.8743	-0.357991	NA	16.7732	16.4631	NA	20.6633	NA	12.8291	NA	NA	NA	NA	NA	20.4068	NA	NA	NA	NA	19.5659	NA	NA	NA	18.9901	NA	17.8285	19.3987	NA	NA	NA	17.77	NA	NA	NA	NA	18.2053	NA	15.5972	NA	NA	NA	31.5535	25.9347	NA	NA	20.3639
C3L-02219-N	Normal	LUAD	21.5045	17.6829	-0.538465	NA	NA	NA	NA	NA	NA	NA	NA	NA	NA	NA	NA	16.8248	NA	NA	NA	NA	17.5046	NA	NA	NA	17.5511	NA	18.4247	18.1091	NA	NA	NA	NA	NA	NA	NA	NA	NA	NA	NA	NA	NA	NA	32.334	24.3813	NA	NA	20.5266
C3L-02219-T	Tumor	LUAD	21.8486	18.9298	0.688255	NA	NA	NA	NA	NA	NA	NA	NA	NA	NA	NA	NA	19.7328	NA	NA	NA	NA	19.1368	NA	NA	NA	18.0343	NA	19.3247	18.4207	NA	NA	NA	NA	NA	NA	NA	NA	NA	NA	NA	NA	NA	NA	31.6885	25.05	NA	NA	20.8027
C3L-02345-N	Normal	LUAD	19.8839	17.0222	-1.10369	NA	NA	NA	NA	17.0997	NA	NA	NA	NA	NA	NA	NA	16.7149	NA	15.4182	NA	NA	17.5105	NA	NA	NA	17.4365	NA	18.7398	18.8397	NA	NA	NA	NA	NA	NA	NA	NA	NA	NA	14.4182	NA	NA	NA	32.2964	24.517	NA	16.1588	20.4913
C3L-02345-T	Tumor	LUAD	21.0772	17.3623	-0.833873	NA	NA	NA	NA	18.1277	NA	NA	NA	NA	NA	NA	NA	17.9216	NA	16.4885	NA	NA	17.8848	NA	NA	NA	17.7939	NA	18.5972	17.7842	NA	NA	NA	NA	NA	NA	NA	NA	NA	NA	14.3004	NA	NA	NA	31.6959	25.0376	NA	17.0927	20.2227
C3L-02348-N	Normal	LUAD	21.1928	16.6841	-1.51888	14.7711	NA	NA	NA	NA	NA	NA	NA	NA	NA	NA	NA	NA	NA	NA	NA	NA	NA	NA	NA	NA	NA	NA	18.803	16.4782	NA	NA	NA	NA	NA	NA	NA	NA	NA	NA	NA	NA	NA	NA	32.2895	24.3161	NA	17.0609	NA
C3L-02348-T	Tumor	LUAD	21.3201	17.2108	-0.999618	15.7978	NA	NA	NA	NA	NA	NA	NA	NA	NA	NA	NA	NA	NA	NA	NA	NA	NA	NA	NA	NA	NA	NA	19.3167	16.518	NA	NA	NA	NA	NA	NA	NA	NA	NA	NA	NA	NA	NA	NA	31.6025	24.4239	NA	16.8143	NA
C3L-02349-N	Normal	LSCC	21.1758	16.6529	-1.54905	NA	17.0855	15.9971	NA	19.7983	NA	NA	NA	NA	NA	12.759	NA	NA	NA	NA	NA	NA	17.916	NA	NA	NA	18.3699	NA	17.1732	18.0755	NA	NA	NA	NA	NA	NA	NA	NA	17.2105	NA	14.9843	NA	13.8127	NA	32.1724	25.2865	NA	18.9196	20.1826
C3L-02349-T	Tumor	LSCC	21.8554	17.6918	-0.550217	NA	17.1649	16.6611	NA	21.1556	NA	NA	NA	NA	NA	14.3769	NA	NA	NA	NA	NA	NA	19.1107	NA	NA	NA	19.3843	NA	18.082	19.9333	NA	NA	NA	NA	NA	NA	NA	NA	17.1656	NA	16.4232	NA	15.1518	NA	31.058	26.2874	NA	18.7738	19.8451
C3L-02350-N	Normal	LUAD	NA	18.0047	NA	NA	NA	NA	NA	NA	NA	NA	NA	NA	NA	NA	NA	NA	NA	NA	NA	NA	18.1097	NA	NA	NA	NA	NA	NA	17.8997	NA	NA	NA	NA	NA	NA	NA	NA	NA	NA	NA	NA	NA	NA	32.2006	24.525	NA	NA	20.487
C3L-02350-T	Tumor	LUAD	NA	18.2459	NA	NA	NA	NA	NA	NA	NA	NA	NA	NA	NA	NA	NA	NA	NA	NA	NA	NA	17.4671	NA	NA	NA	NA	NA	NA	19.0248	NA	NA	NA	NA	NA	NA	NA	NA	NA	NA	NA	NA	NA	NA	31.8953	24.8265	NA	NA	20.1306
C3L-02358-N	Normal	LSCC	20.6688	17.1717	-1.00036	NA	17.0585	16.1082	NA	19.379	NA	NA	NA	NA	NA	NA	NA	18.4853	NA	NA	NA	NA	NA	NA	NA	NA	18.2673	NA	18.6014	18.3494	NA	NA	NA	NA	NA	NA	NA	NA	16.8158	NA	15.0639	NA	13.5886	NA	32.0836	24.9067	NA	NA	20.7154
C3L-02358-T	Tumor	LSCC	21.2438	17.9971	-0.208873	NA	17.1162	16.6745	NA	20.7948	NA	NA	NA	NA	NA	NA	NA	20.9433	NA	NA	NA	NA	NA	NA	NA	NA	18.7434	NA	19.7286	18.9132	NA	NA	NA	NA	NA	NA	NA	NA	17.6117	NA	15.2846	NA	14.1606	NA	30.884	26.5784	NA	NA	19.9372
C3L-02365-N	Normal	LUAD	NA	17.957	NA	NA	NA	NA	NA	NA	NA	NA	NA	NA	NA	NA	NA	NA	NA	NA	NA	NA	17.957	NA	NA	NA	NA	NA	NA	NA	NA	NA	NA	NA	NA	NA	NA	NA	NA	NA	NA	NA	NA	NA	32.1332	24.4793	NA	NA	19.8268
C3L-02365-T	Tumor	LUAD	NA	19.3359	NA	NA	NA	NA	NA	NA	NA	NA	NA	NA	NA	NA	NA	NA	NA	NA	NA	NA	19.3359	NA	NA	NA	NA	NA	NA	NA	NA	NA	NA	NA	NA	NA	NA	NA	NA	NA	NA	NA	NA	NA	31.601	25.4265	NA	NA	20.6779
C3L-02463-N	Normal	PDA	19.211	16.3956	-1.69062	15.9618	NA	NA	NA	NA	NA	NA	NA	NA	NA	NA	NA	18.4185	NA	16.0429	NA	NA	NA	NA	NA	NA	NA	NA	18.8606	15.6196	NA	NA	NA	16.3855	NA	NA	NA	NA	NA	13.4803	NA	NA	NA	NA	31.0024	24.6185	NA	NA	17.4943
C3L-02463-T	Tumor	PDA	19.1127	16.5708	-1.50961	15.8056	NA	NA	NA	NA	NA	NA	NA	NA	NA	NA	NA	18.715	NA	15.7931	NA	NA	NA	NA	NA	NA	NA	NA	18.9342	16.6342	NA	NA	NA	17.168	NA	NA	NA	NA	NA	12.9458	NA	NA	NA	NA	32.1668	24.3195	NA	NA	17.3738
C3L-02465-T	Tumor	GBM	18.3703	17.2682	-0.768556	NA	NA	NA	NA	NA	NA	14.8498	NA	NA	NA	NA	NA	17.8397	NA	NA	NA	NA	NA	NA	NA	NA	NA	16.3917	18.3737	19.2785	NA	NA	NA	NA	NA	NA	NA	NA	NA	16.8756	NA	NA	NA	NA	33.2044	26.0357	NA	NA	19.0704
C3L-02504-T	Tumor	GBM	NA	18.0913	NA	NA	14.2945	NA	NA	19.6329	NA	NA	NA	NA	NA	NA	NA	NA	NA	NA	NA	NA	NA	NA	NA	NA	NA	NA	19.7136	18.7244	NA	NA	NA	NA	NA	NA	NA	NA	NA	NA	NA	NA	NA	NA	33.0262	25.4052	NA	NA	NA
C3L-02508-N	Normal	LUAD	22.2179	18.615	0.351646	NA	NA	NA	NA	NA	NA	NA	NA	NA	NA	NA	NA	NA	NA	NA	NA	NA	NA	NA	NA	NA	NA	NA	18.615	NA	NA	NA	NA	NA	NA	NA	NA	NA	NA	NA	NA	NA	NA	NA	31.711	24.9087	NA	17.6684	NA
C3L-02508-T	Tumor	LUAD	21.6184	17.0276	-1.20041	15.6732	NA	NA	NA	NA	NA	NA	NA	NA	NA	NA	NA	NA	NA	NA	NA	NA	NA	NA	NA	NA	NA	NA	18.8492	16.5604	NA	NA	NA	NA	NA	NA	NA	NA	NA	NA	NA	NA	NA	NA	32.1414	24.6094	NA	17.384	NA
C3L-02542-T	Tumor	GBM	20.8527	18.4034	0.220514	NA	NA	NA	NA	NA	NA	NA	NA	NA	15.0335	NA	NA	NA	NA	NA	NA	NA	NA	NA	NA	NA	NA	18.1705	20.6583	19.7515	NA	NA	NA	NA	NA	NA	NA	NA	NA	NA	NA	NA	NA	NA	32.5819	27.0236	NA	NA	19.5809
C3L-02546-N	Normal	LSCC	20.4462	17.5795	-0.579447	14.6194	NA	NA	NA	18.7271	NA	NA	NA	NA	NA	NA	NA	NA	NA	NA	NA	NA	17.1546	NA	NA	NA	17.7615	NA	19.1182	19.072	NA	NA	NA	NA	NA	NA	NA	NA	16.6041	NA	NA	NA	NA	NA	32.1938	24.9581	NA	18.1937	20.3582
C3L-02546-T	Tumor	LSCC	22.0236	19.7898	1.53787	17.6228	NA	NA	NA	21.5604	NA	NA	NA	NA	NA	NA	NA	21.7061	NA	NA	NA	NA	19.1318	NA	NA	NA	19.2733	NA	20.5579	20.3211	NA	NA	NA	NA	NA	NA	NA	NA	18.1447	NA	NA	NA	NA	NA	32.0796	26.0685	NA	18.3197	19.75
C3L-02549-N	Normal	LUAD	NA	17.1923	NA	NA	NA	NA	NA	NA	NA	NA	NA	NA	NA	NA	NA	NA	NA	NA	NA	NA	17.1923	NA	NA	NA	NA	NA	NA	NA	NA	NA	NA	NA	NA	NA	NA	NA	NA	NA	NA	NA	NA	NA	32.3031	24.4343	NA	NA	20.3253
C3L-02549-T	Tumor	LUAD	NA	18.0465	NA	NA	NA	NA	NA	NA	NA	NA	NA	NA	NA	NA	NA	NA	NA	NA	NA	NA	18.0465	NA	NA	NA	NA	NA	NA	NA	NA	NA	NA	NA	NA	NA	NA	NA	NA	NA	NA	NA	NA	NA	31.3869	24.7517	NA	NA	20.1306
C3L-02552-N	Normal	LSCC	20.883	16.8937	-1.29103	NA	NA	NA	NA	19.3227	NA	NA	NA	NA	NA	NA	12.7019	17.0092	NA	19.0065	NA	NA	17.9251	NA	NA	NA	NA	NA	NA	18.4862	NA	NA	NA	NA	NA	NA	NA	NA	17.0905	13.6074	NA	NA	NA	NA	32.2885	25.3082	NA	NA	20.9858
C3L-02552-T	Tumor	LSCC	21.0723	17.4022	-0.79364	NA	NA	NA	NA	20.2422	NA	NA	NA	NA	NA	NA	13.4811	18.6548	NA	19.3734	NA	NA	18.4846	NA	NA	NA	NA	NA	NA	18.773	NA	NA	NA	NA	NA	NA	NA	NA	17.3508	12.858	NA	NA	NA	NA	31.6585	25.2045	NA	NA	20.5177
C3L-02604-T	Tumor	PDA	NA	18.0974	NA	NA	NA	NA	NA	NA	NA	NA	NA	NA	NA	NA	NA	19.5533	NA	NA	NA	NA	NA	NA	NA	NA	NA	NA	NA	16.6415	NA	NA	NA	NA	NA	NA	NA	NA	NA	NA	NA	NA	NA	NA	32.1361	25.0334	NA	NA	NA
C3L-02606-N	Normal	PDA	NA	16.3185	NA	NA	NA	NA	NA	NA	NA	NA	NA	NA	NA	NA	NA	16.3552	NA	16.2818	NA	NA	NA	NA	NA	NA	NA	NA	NA	NA	NA	NA	NA	NA	NA	NA	NA	NA	NA	NA	NA	NA	NA	NA	30.8642	24.1719	NA	NA	NA
C3L-02606-T	Tumor	PDA	NA	16.8813	NA	NA	NA	NA	NA	NA	NA	NA	NA	NA	NA	NA	NA	18.2615	NA	15.5011	NA	NA	NA	NA	NA	NA	NA	NA	NA	NA	NA	NA	NA	NA	NA	NA	NA	NA	NA	NA	NA	NA	NA	NA	31.9958	24.1736	NA	NA	NA
C3L-02610-N	Normal	PDA	NA	18.4326	NA	NA	NA	NA	NA	18.3472	NA	NA	NA	NA	NA	NA	NA	NA	NA	NA	NA	NA	NA	NA	NA	NA	NA	NA	18.5179	NA	NA	NA	NA	NA	NA	NA	NA	NA	NA	NA	NA	NA	NA	NA	31.0349	23.9684	NA	NA	NA
C3L-02610-T	Tumor	PDA	NA	18.4507	NA	NA	NA	NA	NA	18.4535	NA	NA	NA	NA	NA	NA	NA	NA	NA	NA	NA	NA	NA	NA	NA	NA	NA	NA	18.448	NA	NA	NA	NA	NA	NA	NA	NA	NA	NA	NA	NA	NA	NA	NA	31.993	25.0523	NA	NA	NA
C3L-02613-T	Tumor	PDA	NA	19.0465	NA	17.433	NA	NA	NA	19.8097	NA	NA	NA	NA	NA	NA	NA	20.202	NA	NA	NA	NA	18.7411	NA	NA	NA	NA	NA	NA	NA	NA	NA	NA	NA	NA	NA	NA	NA	NA	NA	NA	NA	NA	NA	31.6119	25.8602	NA	NA	NA
C3L-02617-N	Normal	HNSCC	18.3759	16.1253	-1.91174	NA	NA	NA	NA	NA	NA	NA	NA	NA	NA	NA	NA	15.7222	NA	NA	NA	NA	17.2384	NA	NA	NA	NA	NA	NA	NA	NA	NA	NA	NA	NA	NA	NA	NA	NA	NA	NA	NA	NA	15.4153	32.036	24.6078	NA	NA	NA
C3L-02617-T	Tumor	HNSCC	20.2834	19.77	1.6206	NA	NA	NA	NA	NA	NA	NA	NA	NA	NA	NA	NA	19.067	NA	NA	NA	NA	19.3205	NA	NA	NA	NA	NA	21.3568	NA	NA	NA	NA	19.3357	NA	NA	NA	NA	NA	NA	NA	NA	NA	NA	30.9993	26.5521	NA	NA	NA
C3L-02619-N	Normal	LSCC	20.77	18.3419	0.163818	NA	NA	NA	NA	18.9268	NA	NA	NA	NA	NA	NA	NA	NA	NA	NA	NA	NA	17.7243	NA	NA	NA	NA	NA	19.265	18.8041	NA	NA	NA	NA	NA	NA	NA	NA	16.9892	NA	NA	NA	NA	NA	32.0695	25.3009	NA	18.6881	21.1289
C3L-02619-T	Tumor	LSCC	22.3038	20.7603	2.49186	NA	NA	NA	NA	21.9249	NA	NA	NA	NA	NA	NA	NA	22.1023	NA	NA	NA	NA	21.4666	NA	NA	NA	NA	NA	20.6702	19.9681	NA	NA	NA	NA	NA	NA	NA	NA	18.4294	NA	NA	NA	NA	NA	31.257	26.5654	NA	18.2583	19.9814
C3L-02621-N	Normal	HNSCC	18.2643	17.0448	-0.985714	NA	NA	14.4984	NA	19.6336	NA	NA	NA	NA	NA	NA	NA	15.9411	NA	NA	NA	NA	NA	NA	NA	16.0821	NA	NA	20.4526	17.3298	NA	NA	NA	NA	NA	NA	NA	NA	NA	NA	NA	NA	NA	15.3756	31.9898	25.0016	NA	NA	NA
C3L-02621-T	Tumor	HNSCC	19.2164	17.9759	-0.110654	NA	NA	15.1903	NA	21.1011	NA	NA	NA	NA	NA	NA	NA	16.6326	NA	NA	NA	NA	NA	NA	NA	16.3589	NA	NA	21.5397	18.998	NA	NA	NA	NA	NA	NA	NA	NA	NA	NA	NA	NA	NA	16.0106	31.3084	25.0984	NA	NA	NA
C3L-02624-N	Normal	LSCC	21.0349	18.0461	-0.147598	NA	16.2659	NA	NA	19.4746	NA	NA	NA	NA	NA	NA	NA	18.2556	NA	NA	NA	NA	17.2029	NA	NA	NA	18.6172	NA	19.4336	18.2547	NA	NA	NA	17.3248	NA	NA	NA	NA	17.5853	NA	NA	NA	NA	NA	32.0592	25.5854	NA	18.1455	20.4163
C3L-02624-T	Tumor	LSCC	22.657	19.9102	1.62104	NA	16.2694	NA	NA	22.0103	NA	NA	NA	NA	NA	NA	NA	21.7146	NA	NA	NA	NA	18.984	NA	NA	NA	19.2215	NA	21.4244	21.0762	NA	NA	NA	19.3784	NA	NA	NA	NA	19.1134	NA	NA	NA	NA	NA	30.7216	29.0018	NA	19.6864	19.2481
C3L-02625-N	Normal	LSCC	20.44	17.1727	-0.985952	NA	NA	16.0466	NA	19.1491	NA	NA	NA	NA	NA	NA	NA	NA	NA	NA	NA	NA	NA	NA	NA	NA	19.9753	NA	18.3502	18.3813	NA	NA	NA	11.1336	NA	NA	NA	NA	NA	NA	NA	NA	NA	NA	32.0466	25.0721	NA	NA	20.3564
C3L-02625-T	Tumor	LSCC	21.9594	18.8215	0.573336	NA	NA	16.9457	NA	21.5083	NA	NA	NA	NA	NA	NA	NA	NA	NA	NA	NA	NA	NA	NA	NA	NA	19.5254	NA	20.6987	20.0795	NA	NA	NA	14.1711	NA	NA	NA	NA	NA	NA	NA	NA	NA	NA	31.0268	26.4193	NA	NA	20.4749
C3L-02627-N	Normal	LSCC	20.6169	16.8083	-1.36071	NA	16.9105	16.2843	NA	19.4293	NA	12.8221	NA	NA	NA	NA	NA	NA	NA	NA	NA	NA	16.852	NA	NA	NA	18.4007	NA	16.8961	18.3039	NA	NA	NA	17.2629	NA	NA	NA	NA	17.1413	NA	14.5886	NA	NA	NA	31.8247	25.5764	NA	NA	19.8292
C3L-02627-T	Tumor	LSCC	21.6675	18.102	-0.128924	NA	17.893	16.7694	NA	20.9945	NA	12.7007	NA	NA	NA	NA	NA	20.7452	NA	NA	NA	NA	19.3606	NA	NA	NA	19.5448	NA	17.8995	19.4362	NA	NA	NA	18.042	NA	NA	NA	NA	18.1012	NA	15.7368	NA	NA	NA	30.6253	26.6506	NA	NA	20.2958
C3L-02629-N	Normal	LSCC	22.1015	18.3668	0.11035	NA	NA	NA	NA	NA	NA	NA	NA	NA	NA	NA	NA	18.4232	NA	NA	NA	NA	18.056	NA	NA	NA	18.3084	NA	19.623	18.7689	NA	NA	NA	NA	NA	NA	NA	NA	17.0215	NA	NA	NA	NA	NA	32.2948	24.6663	NA	NA	20.1597
C3L-02629-T	Tumor	LSCC	21.7481	19.9836	1.74793	NA	NA	NA	NA	NA	NA	NA	NA	NA	NA	NA	NA	21.2461	NA	NA	NA	NA	19.7077	NA	NA	NA	19.6489	NA	20.3937	20.6845	NA	NA	NA	NA	NA	NA	NA	NA	18.2206	NA	NA	NA	NA	NA	31.8385	25.7688	NA	NA	20.5599
C3L-02642-T	Tumor	GBM	17.6841	16.9239	-1.07239	NA	NA	NA	NA	NA	NA	14.9008	NA	NA	NA	NA	NA	18.5542	NA	NA	NA	NA	NA	NA	NA	NA	NA	15.9355	18.4578	17.3973	NA	NA	NA	NA	NA	NA	NA	NA	NA	16.2977	NA	NA	NA	NA	32.0577	25.0504	NA	NA	18.6951
C3L-02646-N	Normal	LSCC	22.1765	18.091	-0.169937	15.2289	17.5141	NA	NA	19.788	NA	NA	NA	NA	NA	NA	NA	18.4132	NA	NA	NA	NA	17.9816	NA	NA	NA	18.7285	NA	19.5733	NA	NA	NA	NA	NA	NA	NA	NA	NA	17.5001	NA	NA	NA	NA	NA	32.3432	25.0435	NA	NA	21.0366
C3L-02646-T	Tumor	LSCC	21.689	20.197	1.96482	18.4198	17.445	NA	NA	22.1759	NA	NA	NA	NA	NA	NA	NA	22.3721	NA	NA	NA	NA	20.6508	NA	NA	NA	20.2479	NA	20.9668	20.8389	NA	NA	NA	NA	NA	NA	NA	NA	18.6558	NA	NA	NA	NA	NA	31.167	26.1931	NA	NA	20.3777
C3L-02648-N	Normal	LSCC	20.3815	17.8528	-0.302354	NA	17.0455	NA	NA	NA	NA	NA	NA	NA	NA	NA	NA	NA	NA	NA	NA	NA	NA	NA	NA	NA	NA	NA	19.2496	18.2673	NA	NA	NA	NA	NA	NA	NA	NA	16.8489	NA	NA	NA	NA	NA	31.903	25.1139	NA	18.3528	20.6082
C3L-02648-T	Tumor	LSCC	22.1519	19.8338	1.57433	NA	17.4805	NA	NA	NA	NA	NA	NA	NA	NA	NA	NA	NA	NA	NA	NA	NA	NA	NA	NA	NA	NA	NA	21.7251	21.0521	NA	NA	NA	NA	NA	NA	NA	NA	19.0774	NA	NA	NA	NA	NA	31.2956	26.1912	NA	18.6711	20.2805
C3L-02649-N	Normal	LSCC	20.2188	18.5237	0.378085	NA	NA	NA	NA	19.825	NA	NA	NA	NA	NA	NA	NA	17.5351	NA	18.598	NA	NA	NA	NA	NA	NA	18.586	NA	NA	18.5948	NA	NA	NA	18.0031	NA	NA	NA	NA	NA	NA	NA	NA	NA	NA	31.6593	25.5398	NA	NA	21.0061
C3L-02649-T	Tumor	LSCC	23.4013	20.7904	2.45732	NA	NA	18.0579	NA	23.3088	NA	NA	NA	NA	NA	NA	NA	22.0971	NA	20.9147	NA	NA	NA	NA	NA	NA	20.8553	NA	NA	21.4271	NA	NA	NA	18.8717	NA	NA	NA	NA	NA	NA	NA	NA	NA	NA	31.0545	26.9805	NA	NA	20.7615
C3L-02650-N	Normal	LSCC	20.529	17.4215	-0.742347	NA	16.69	16.3102	NA	19.8457	NA	NA	NA	NA	NA	NA	NA	18.8684	NA	NA	NA	NA	NA	NA	NA	NA	18.1173	NA	19.1016	19.481	NA	NA	NA	NA	NA	NA	NA	NA	17.1236	NA	15.1295	NA	13.5477	NA	32.1678	25.0262	NA	NA	20.3556
C3L-02650-T	Tumor	LSCC	21.2744	18.3644	0.156614	NA	17.0995	16.9101	NA	20.9214	NA	NA	NA	NA	NA	NA	NA	21.0729	NA	NA	NA	NA	NA	NA	NA	NA	19.1675	NA	20.239	19.753	NA	NA	NA	NA	NA	NA	NA	NA	18.207	NA	15.4764	NA	14.797	NA	31.3309	26.1986	NA	NA	20.0198
C3L-02651-N	Normal	HNSCC	18.3042	17.4082	-0.624573	NA	NA	NA	NA	NA	NA	NA	NA	NA	NA	NA	NA	NA	NA	NA	NA	NA	17.4082	NA	NA	NA	NA	NA	NA	NA	NA	NA	NA	NA	NA	NA	NA	NA	NA	NA	NA	NA	NA	NA	32.0063	24.7638	NA	NA	NA
C3L-02651-T	Tumor	HNSCC	19.2571	18.0395	-0.0494746	NA	NA	NA	NA	NA	NA	NA	NA	NA	NA	NA	NA	18.2804	NA	NA	NA	NA	19.5615	NA	NA	NA	NA	NA	NA	NA	NA	NA	NA	NA	NA	NA	NA	NA	NA	NA	NA	NA	NA	16.2765	31.5438	25.4152	NA	NA	NA
C3L-02660-N	Normal	LSCC	20.0399	16.6701	-1.46498	NA	NA	NA	NA	18.8479	NA	NA	NA	NA	NA	NA	12.9451	NA	NA	19.1405	NA	NA	16.9861	NA	NA	NA	NA	NA	NA	18.7806	NA	NA	NA	NA	NA	NA	NA	NA	16.7637	13.2264	NA	NA	NA	NA	31.9355	24.9822	NA	NA	21.1209
C3L-02660-T	Tumor	LSCC	21.5488	18.1851	-0.0388243	NA	NA	NA	NA	20.6474	NA	NA	NA	NA	NA	NA	14.0705	20.2017	NA	19.2957	NA	NA	18.7743	NA	NA	NA	NA	NA	NA	19.8067	NA	NA	NA	NA	NA	NA	NA	NA	17.9956	14.6888	NA	NA	NA	NA	31.6869	26.1935	NA	NA	19.9642
C3L-02665-N	Normal	LSCC	20.8224	17.9579	-0.223262	15.1703	NA	NA	NA	19.181	NA	NA	NA	NA	NA	NA	NA	NA	NA	NA	NA	NA	18.3499	NA	NA	NA	18.191	NA	19.3721	18.383	NA	NA	NA	NA	NA	NA	NA	NA	17.058	NA	NA	NA	NA	NA	31.8194	25.4596	NA	18.0041	20.3029
C3L-02665-T	Tumor	LSCC	21.6265	19.9499	1.72138	17.9676	NA	NA	NA	21.5114	NA	NA	NA	NA	NA	NA	NA	21.7784	NA	NA	NA	NA	20.3406	NA	NA	NA	19.6223	NA	20.2369	20.0673	NA	NA	NA	NA	NA	NA	NA	NA	18.0747	NA	NA	NA	NA	NA	31.5814	26.932	NA	18.6097	20.0639
C3L-02669-N	Normal	LSCC	19.5515	17.7909	-0.31543	NA	17.4848	NA	NA	18.9668	NA	NA	NA	NA	NA	NA	NA	NA	NA	NA	NA	NA	17.1476	NA	NA	NA	18.1964	NA	NA	18.2708	NA	NA	NA	17.2192	NA	NA	NA	NA	17.2503	NA	NA	NA	NA	NA	32.1104	25.2074	15.5429	18.3586	20.4868
C3L-02669-T	Tumor	LSCC	22.905	19.4359	1.13205	NA	17.6165	NA	NA	21.5747	NA	NA	NA	NA	NA	NA	NA	NA	NA	NA	NA	NA	19.5405	NA	NA	NA	19.8065	NA	NA	20.3813	NA	NA	NA	18.5914	NA	NA	NA	NA	18.5401	NA	NA	NA	NA	NA	31.4594	26.0691	14.8611	18.5071	21.899
C3L-02701-T	Tumor	PDA	19.7585	16.047	-2.07143	15.1672	NA	NA	NA	18.1923	NA	NA	NA	NA	NA	NA	NA	18.1356	NA	NA	NA	NA	17.4026	NA	NA	NA	NA	NA	18.9707	13.8091	NA	13.4488	NA	NA	NA	NA	NA	NA	NA	13.2501	NA	NA	NA	NA	31.9007	23.8381	NA	NA	17.6966
C3L-02704-T	Tumor	GBM	18.2819	18.3029	0.271364	NA	NA	NA	NA	NA	NA	NA	NA	NA	NA	NA	NA	NA	NA	NA	NA	NA	19.4102	NA	NA	NA	NA	16.3497	21.3569	18.0996	NA	NA	NA	NA	NA	NA	NA	NA	NA	16.2979	NA	NA	NA	NA	33.144	25.0062	NA	16.2671	NA
C3L-02705-T	Tumor	GBM	NA	17.7738	NA	NA	14.1474	NA	NA	19.4147	NA	NA	NA	NA	NA	NA	NA	NA	NA	NA	NA	NA	NA	NA	NA	NA	NA	NA	19.1779	18.3551	NA	NA	NA	NA	NA	NA	NA	NA	NA	NA	NA	NA	NA	NA	32.4041	25.5126	NA	NA	NA
C3L-02707-T	Tumor	GBM	18.4178	18.8907	0.851184	NA	NA	NA	NA	19.7703	NA	NA	NA	NA	NA	NA	NA	19.5136	NA	NA	NA	NA	20.1149	NA	NA	NA	NA	16.6593	21.2245	NA	NA	NA	NA	NA	NA	NA	NA	NA	NA	16.0616	NA	NA	NA	NA	32.5182	25.4965	NA	NA	NA
C3L-02708-T	Tumor	GBM	NA	18.2943	NA	NA	NA	NA	NA	NA	NA	NA	NA	NA	NA	NA	NA	NA	NA	15.015	NA	NA	NA	NA	NA	NA	NA	NA	21.549	18.3188	NA	NA	NA	NA	NA	NA	NA	NA	NA	NA	NA	NA	NA	NA	34.0858	24.929	NA	NA	NA
C3L-02809-N	Normal	PDA	NA	NA	NA	NA	NA	NA	NA	NA	NA	NA	NA	NA	NA	NA	NA	NA	NA	NA	NA	NA	NA	NA	NA	NA	NA	NA	NA	NA	NA	NA	NA	NA	NA	NA	NA	NA	NA	NA	NA	NA	NA	NA	33.0863	23.1077	NA	NA	NA
C3L-02809-T	Tumor	PDA	NA	NA	NA	NA	NA	NA	NA	NA	NA	NA	NA	NA	NA	NA	NA	NA	NA	NA	NA	NA	NA	NA	NA	NA	NA	NA	NA	NA	NA	NA	NA	NA	NA	NA	NA	NA	NA	NA	NA	NA	NA	NA	32.2379	24.1256	NA	NA	NA
C3L-02890-N	Normal	PDA	NA	17.0569	NA	NA	NA	NA	NA	NA	NA	NA	NA	NA	NA	NA	NA	NA	NA	NA	NA	NA	17.0569	NA	NA	NA	NA	NA	NA	NA	NA	NA	NA	NA	NA	NA	NA	NA	NA	NA	NA	NA	NA	NA	31.418	24.5499	NA	NA	18.1289
C3L-02890-T	Tumor	PDA	NA	16.6995	NA	NA	NA	NA	NA	NA	NA	NA	NA	NA	NA	NA	NA	NA	NA	NA	NA	NA	16.6995	NA	NA	NA	NA	NA	NA	NA	NA	NA	NA	NA	NA	NA	NA	NA	NA	NA	NA	NA	NA	NA	31.7215	24.653	NA	NA	18.6595
C3L-02891-N	Normal	LSCC	20.2631	18.4412	0.29297	NA	NA	NA	NA	NA	NA	NA	NA	NA	NA	NA	NA	18.6398	NA	20.2446	NA	NA	18.0794	NA	NA	NA	18.5935	NA	16.7682	18.3216	NA	NA	NA	NA	NA	NA	NA	NA	NA	NA	NA	NA	NA	NA	32.5745	25.5284	NA	NA	21.3292
C3L-02891-T	Tumor	LSCC	21.9494	19.4922	1.24464	NA	NA	NA	NA	NA	NA	NA	NA	NA	NA	NA	NA	21.0817	NA	19.2474	NA	NA	19.1199	NA	NA	NA	19.0168	NA	18.4563	20.0309	NA	NA	NA	NA	NA	NA	NA	NA	NA	NA	NA	NA	NA	NA	31.3645	26.1414	NA	NA	19.7574
C3L-02897-T	Tumor	PDA	NA	18.8115	NA	NA	NA	NA	NA	NA	NA	NA	NA	NA	NA	NA	NA	18.8115	NA	NA	NA	NA	NA	NA	NA	NA	NA	NA	NA	NA	NA	NA	NA	NA	NA	NA	NA	NA	NA	NA	NA	NA	NA	NA	31.9269	24.2828	NA	NA	NA
C3L-02899-N	Normal	PDA	NA	16.4837	NA	15.0634	NA	NA	NA	18.185	NA	NA	NA	NA	NA	NA	NA	16.3212	NA	NA	NA	NA	16.3649	NA	NA	NA	NA	NA	NA	NA	NA	NA	NA	NA	NA	NA	NA	NA	NA	NA	NA	NA	NA	NA	32.4141	24.0035	NA	NA	NA
C3L-02899-T	Tumor	PDA	NA	17.4585	NA	15.8693	NA	NA	NA	18.6543	NA	NA	NA	NA	NA	NA	NA	18.1395	NA	NA	NA	NA	17.1708	NA	NA	NA	NA	NA	NA	NA	NA	NA	NA	NA	NA	NA	NA	NA	NA	NA	NA	NA	NA	NA	32.3522	24.1164	NA	NA	NA
C3L-02900-T	Tumor	GBM	NA	18.3191	NA	NA	NA	NA	NA	NA	NA	NA	NA	NA	NA	NA	NA	NA	NA	NA	NA	NA	NA	NA	NA	NA	NA	NA	NA	18.3191	NA	NA	NA	NA	NA	NA	NA	NA	NA	NA	NA	NA	NA	NA	33.789	23.728	NA	NA	NA
C3L-02951-N	Normal	LSCC	21.454	18.1165	-0.101805	NA	NA	NA	NA	NA	NA	NA	NA	NA	NA	NA	NA	17.995	NA	NA	NA	NA	17.5882	NA	NA	NA	18.0875	NA	19.3806	18.7878	NA	NA	NA	NA	NA	NA	NA	NA	16.8603	NA	NA	NA	NA	NA	32.1913	24.3116	NA	NA	20.4587
C3L-02951-T	Tumor	LSCC	21.5476	20.1753	1.95141	NA	NA	NA	NA	NA	NA	NA	NA	NA	NA	NA	NA	21.8357	NA	NA	NA	NA	20.1778	NA	NA	NA	19.3326	NA	20.6184	20.9688	NA	NA	NA	NA	NA	NA	NA	NA	18.1184	NA	NA	NA	NA	NA	31.5455	25.8724	NA	NA	19.8287
C3L-02955-T	Tumor	GBM	17.6657	18.5588	0.563606	NA	NA	NA	NA	19.078	NA	NA	NA	NA	NA	NA	NA	18.1515	NA	NA	NA	NA	19.2174	NA	NA	NA	NA	17.7151	20.3923	NA	NA	NA	NA	NA	NA	NA	NA	NA	NA	16.7986	NA	NA	NA	NA	32.2981	24.8683	NA	NA	NA
C3L-02963-N	Normal	LSCC	22.6454	17.7811	-0.507461	NA	NA	NA	NA	NA	NA	NA	NA	NA	NA	NA	NA	NA	NA	NA	NA	NA	17.1574	NA	NA	NA	18.506	NA	18.4942	NA	NA	NA	NA	NA	NA	NA	NA	NA	16.9667	NA	NA	NA	NA	NA	32.0844	25.5833	NA	NA	20.7793
C3L-02963-T	Tumor	LSCC	21.3095	18.3421	0.132311	16.4629	17.1514	NA	NA	19.9696	NA	NA	NA	NA	NA	NA	NA	18.9194	NA	NA	NA	NA	17.7077	NA	NA	NA	18.4156	NA	19.7669	19.12	NA	NA	NA	NA	NA	NA	NA	NA	17.5657	NA	NA	NA	NA	NA	31.6549	25.5683	NA	NA	19.7315
C3L-02964-N	Normal	LSCC	20.1137	17.8651	-0.274272	NA	17.5211	NA	NA	19.0665	NA	NA	NA	NA	NA	NA	NA	NA	NA	NA	NA	NA	17.8227	NA	NA	NA	17.958	NA	NA	18.5317	NA	NA	NA	16.9205	NA	NA	NA	NA	17.2354	NA	NA	NA	NA	NA	32.0017	25.179	15.4054	18.666	20.731
C3L-02964-T	Tumor	LSCC	22.224	19.0396	0.775912	NA	16.6205	NA	NA	21.3374	NA	NA	NA	NA	NA	NA	NA	NA	NA	NA	NA	NA	19.392	NA	NA	NA	19.3925	NA	NA	20.0106	NA	NA	NA	18.278	NA	NA	NA	NA	18.2463	NA	NA	NA	NA	NA	31.1638	26.2204	15.4257	18.8187	20.1543
C3L-02968-N	Normal	LSCC	20.9139	18.491	0.304465	NA	NA	NA	NA	NA	NA	NA	NA	NA	NA	NA	NA	18.8989	NA	NA	NA	NA	17.292	NA	NA	NA	18.4681	NA	19.0629	18.7331	NA	NA	NA	NA	NA	NA	NA	NA	NA	NA	NA	NA	NA	NA	32.1654	25.234	NA	NA	20.7509
C3L-02968-T	Tumor	LSCC	21.2707	19.5141	1.30654	NA	NA	NA	NA	NA	NA	NA	NA	NA	NA	NA	NA	20.6156	NA	NA	NA	NA	19.3474	NA	NA	NA	18.7282	NA	19.6324	19.2468	NA	NA	NA	NA	NA	NA	NA	NA	NA	NA	NA	NA	NA	NA	31.188	26.4437	NA	19.2021	19.301
C3L-02969-N	Normal	LSCC	20.2844	18.6164	0.466962	NA	NA	NA	NA	19.1004	NA	NA	NA	NA	NA	NA	NA	18.6526	NA	18.5461	NA	NA	NA	NA	NA	NA	19.0901	NA	19.1944	18.982	NA	NA	NA	NA	NA	NA	NA	NA	16.7492	NA	NA	NA	NA	NA	31.9589	25.1667	NA	NA	NA
C3L-02969-T	Tumor	LSCC	22.1655	19.9766	1.71635	NA	NA	NA	NA	21.4135	NA	NA	NA	NA	NA	NA	NA	21.0684	NA	19.9993	NA	NA	NA	NA	NA	NA	19.2704	NA	20.3108	20.0091	NA	NA	NA	NA	NA	NA	NA	NA	17.7647	NA	NA	NA	NA	NA	31.3207	26.1082	NA	NA	NA
C3L-02970-T	Tumor	GBM	19.3433	18.3585	0.26448	NA	NA	NA	NA	NA	NA	NA	NA	NA	NA	NA	NA	NA	NA	NA	NA	NA	NA	NA	NA	NA	NA	NA	21.8485	19.8865	NA	NA	14.6085	NA	NA	NA	NA	NA	NA	17.0906	NA	NA	NA	NA	31.7263	25.7296	NA	NA	19.629
C3L-02984-T	Tumor	GBM	18.6306	16.6368	-1.41528	NA	NA	NA	NA	NA	NA	NA	NA	NA	13.1862	NA	NA	NA	NA	NA	NA	NA	NA	NA	NA	NA	NA	16.3625	18.7291	18.2693	NA	NA	NA	NA	NA	NA	NA	NA	NA	NA	NA	NA	NA	NA	31.7343	24.2632	NA	NA	19.2991
C3L-03123-N	Normal	PDA	19.1929	17.8367	-0.248428	NA	NA	NA	NA	18.3733	NA	NA	NA	NA	NA	NA	NA	NA	NA	15.9371	NA	NA	17.4223	NA	NA	NA	NA	NA	18.3169	NA	NA	NA	NA	16.3807	NA	NA	NA	NA	NA	NA	NA	20.59	NA	NA	31.2666	23.8014	NA	NA	NA
C3L-03123-T	Tumor	PDA	19.2037	18.361	0.275171	NA	NA	NA	NA	19.5438	NA	NA	NA	NA	NA	NA	NA	NA	NA	17.2773	NA	NA	17.7687	NA	NA	NA	NA	NA	19.3337	NA	NA	NA	NA	17.4008	NA	NA	NA	NA	NA	NA	NA	18.8414	NA	NA	31.8249	25.0612	NA	NA	NA
C3L-03129-T	Tumor	PDA	NA	18.1606	NA	NA	NA	NA	NA	NA	NA	NA	NA	NA	NA	NA	NA	18.0355	NA	NA	NA	NA	NA	NA	NA	NA	NA	NA	18.2858	NA	NA	NA	NA	NA	NA	NA	NA	NA	NA	NA	NA	NA	NA	NA	31.4763	23.755	NA	NA	17.7182
C3L-03260-T	Tumor	GBM	18.6408	17.6117	-0.440996	NA	NA	NA	NA	19.716	NA	NA	NA	NA	NA	NA	NA	20.0231	NA	14.9519	NA	NA	NA	18.1254	NA	NA	NA	17.3788	19.7518	18.6459	NA	NA	NA	14.5559	NA	NA	NA	NA	15.3562	NA	NA	NA	NA	NA	32.1959	25.787	NA	16.1548	NA
C3L-03266-T	Tumor	GBM	NA	18.0342	NA	NA	NA	NA	NA	NA	NA	NA	NA	NA	NA	NA	NA	NA	NA	14.7743	NA	NA	NA	NA	NA	NA	NA	NA	21.0161	18.3121	NA	NA	NA	NA	NA	NA	NA	NA	NA	NA	NA	NA	NA	NA	32.8447	24.9712	NA	NA	NA
C3L-03272-N	Normal	LSCC	20.2984	18.0243	-0.126021	NA	NA	16.2941	NA	19.8095	NA	NA	NA	NA	NA	NA	NA	NA	NA	18.8032	NA	NA	17.0376	NA	NA	NA	18.2423	NA	19.6581	18.8251	NA	NA	NA	17.3906	NA	NA	NA	NA	NA	NA	16.1578	NA	NA	NA	32.0806	25.1677	NA	NA	20.742
C3L-03272-T	Tumor	LSCC	21.634	18.9391	0.710173	NA	NA	16.2141	NA	21.3802	NA	NA	NA	NA	NA	NA	NA	20.3162	NA	19.8423	NA	NA	19.1876	NA	NA	NA	18.5314	NA	20.5624	19.7486	NA	NA	NA	18.0708	NA	NA	NA	NA	NA	NA	15.5377	NA	NA	NA	30.9898	26.8389	NA	NA	20.2678
C3L-03350-N	Normal	PDA	NA	17.2355	NA	NA	NA	NA	NA	NA	NA	NA	NA	NA	NA	NA	NA	17.2355	NA	NA	NA	NA	NA	NA	NA	NA	NA	NA	NA	NA	NA	NA	NA	NA	NA	NA	NA	NA	NA	NA	NA	NA	NA	NA	30.7444	23.1175	NA	NA	NA
C3L-03356-N	Normal	PDA	NA	16.6543	NA	NA	NA	NA	NA	NA	NA	NA	NA	NA	NA	NA	NA	NA	NA	NA	NA	NA	16.6543	NA	NA	NA	NA	NA	NA	NA	NA	NA	NA	NA	NA	NA	NA	NA	NA	NA	NA	NA	NA	NA	30.9048	23.6374	NA	NA	18.0909
C3L-03356-T	Tumor	PDA	NA	17.4688	NA	NA	NA	NA	NA	NA	NA	NA	NA	NA	NA	NA	NA	NA	NA	NA	NA	NA	17.4688	NA	NA	NA	NA	NA	NA	NA	NA	NA	NA	NA	NA	NA	NA	NA	NA	NA	NA	NA	NA	NA	32.9515	24.1963	NA	NA	17.4752
C3L-03371-N	Normal	PDA	NA	17.8855	NA	NA	NA	NA	NA	NA	NA	NA	NA	NA	NA	NA	NA	17.8855	NA	NA	NA	NA	NA	NA	NA	NA	NA	NA	NA	NA	NA	NA	NA	NA	NA	NA	NA	NA	NA	NA	NA	NA	NA	NA	30.9646	24.1358	NA	NA	NA
C3L-03371-T	Tumor	PDA	NA	17.9534	NA	NA	NA	NA	NA	NA	NA	NA	NA	NA	NA	NA	NA	17.9534	NA	NA	NA	NA	NA	NA	NA	NA	NA	NA	NA	NA	NA	NA	NA	NA	NA	NA	NA	NA	NA	NA	NA	NA	NA	NA	32.0627	24.1101	NA	NA	NA
C3L-03378-N	Normal	HNSCC	23.0867	17.8538	-0.46071	NA	NA	NA	NA	19.6994	NA	NA	NA	NA	NA	NA	NA	15.6014	NA	NA	NA	NA	NA	NA	NA	NA	NA	NA	21.7709	NA	NA	NA	NA	14.3435	NA	NA	NA	NA	NA	NA	NA	NA	NA	NA	31.7086	24.974	NA	NA	20.342
C3L-03378-T	Tumor	HNSCC	20.7556	18.3829	0.20567	NA	NA	NA	NA	20.8168	NA	NA	NA	NA	NA	NA	NA	16.4823	NA	NA	NA	NA	NA	NA	NA	NA	NA	NA	21.3253	NA	NA	NA	NA	14.9071	NA	NA	NA	NA	NA	NA	NA	NA	NA	NA	31.4398	26.2381	NA	NA	20.3354
C3L-03387-T	Tumor	GBM	18.0595	16.5329	-1.48552	NA	NA	NA	NA	19.096	NA	NA	NA	NA	NA	NA	NA	17.3546	NA	14.75	NA	NA	NA	NA	NA	NA	NA	15.1013	18.6034	18.2119	NA	NA	NA	13.4793	NA	NA	NA	NA	15.6667	NA	NA	NA	NA	NA	32.771	24.8984	NA	16.0218	NA
C3L-03388-N	Normal	PDA	NA	16.4856	NA	NA	NA	NA	NA	NA	NA	NA	NA	NA	NA	NA	NA	16.4856	NA	NA	NA	NA	NA	NA	NA	NA	NA	NA	NA	NA	NA	NA	NA	NA	NA	NA	NA	NA	NA	NA	NA	NA	NA	NA	30.8099	23.6297	NA	NA	NA
C3L-03388-T	Tumor	PDA	NA	18.075	NA	NA	NA	NA	NA	NA	NA	NA	NA	NA	NA	NA	NA	18.075	NA	NA	NA	NA	NA	NA	NA	NA	NA	NA	NA	NA	NA	NA	NA	NA	NA	NA	NA	NA	NA	NA	NA	NA	NA	NA	31.9117	24.8629	NA	NA	NA
C3L-03390-T	Tumor	GBM	NA	18.8786	NA	NA	NA	NA	NA	20.9749	NA	NA	NA	NA	NA	NA	NA	NA	NA	NA	NA	NA	NA	17.7838	NA	NA	NA	16.8866	21.8946	19.0015	NA	NA	NA	NA	NA	NA	NA	NA	NA	NA	16.7299	NA	NA	NA	32.7164	26.321	NA	NA	19.0322
C3L-03392-T	Tumor	GBM	17.5906	17.5947	-0.396044	NA	NA	NA	NA	18.7905	NA	NA	NA	NA	NA	NA	NA	17.9421	NA	NA	NA	NA	NA	NA	NA	NA	NA	15.3122	19.6394	NA	NA	NA	NA	NA	NA	NA	NA	NA	NA	16.2895	NA	NA	NA	NA	32.4626	24.5258	NA	NA	NA
C3L-03394-N	Normal	PDA	NA	18.8565	NA	NA	NA	NA	NA	NA	NA	NA	NA	NA	NA	NA	NA	16.6975	NA	NA	NA	NA	NA	NA	NA	NA	NA	NA	NA	NA	NA	NA	NA	NA	NA	NA	NA	NA	NA	NA	NA	21.0154	NA	NA	31.0209	24.0661	NA	NA	NA
C3L-03394-T	Tumor	PDA	NA	19.5265	NA	NA	NA	NA	NA	NA	NA	NA	NA	NA	NA	NA	NA	18.2832	NA	NA	NA	NA	NA	NA	NA	NA	NA	NA	NA	NA	NA	NA	NA	NA	NA	NA	NA	NA	NA	NA	NA	20.7698	NA	NA	32.2655	24.0155	NA	NA	NA
C3L-03395-N	Normal	PDA	NA	16.8218	NA	NA	NA	NA	NA	NA	NA	NA	NA	NA	NA	NA	NA	16.8218	NA	NA	NA	NA	NA	NA	NA	NA	NA	NA	NA	NA	NA	NA	NA	NA	NA	NA	NA	NA	NA	NA	NA	NA	NA	NA	31.6676	23.5463	NA	NA	NA
C3L-03395-T	Tumor	PDA	NA	17.2813	NA	NA	NA	NA	NA	NA	NA	NA	NA	NA	NA	NA	NA	17.2813	NA	NA	NA	NA	NA	NA	NA	NA	NA	NA	NA	NA	NA	NA	NA	NA	NA	NA	NA	NA	NA	NA	NA	NA	NA	NA	31.957	23.6288	NA	NA	NA
C3L-03400-T	Tumor	GBM	18.4298	18.6197	0.579524	NA	NA	NA	NA	NA	NA	NA	NA	NA	NA	NA	NA	NA	NA	NA	NA	NA	20.3042	NA	NA	NA	NA	16.9307	20.537	18.5347	NA	NA	NA	NA	NA	NA	NA	NA	NA	16.7921	NA	NA	NA	NA	33.2536	25.7421	NA	16.4515	NA
C3L-03405-T	Tumor	GBM	18.5729	18.3682	0.319574	NA	NA	NA	NA	19.8129	NA	NA	NA	NA	NA	NA	NA	18.5293	NA	NA	NA	NA	19.2331	NA	NA	NA	NA	15.4827	20.5754	NA	NA	NA	NA	NA	NA	NA	NA	NA	NA	16.5759	NA	NA	NA	NA	32.5234	25.8923	NA	NA	NA
C3L-03407-T	Tumor	GBM	19.2968	17.0136	-1.07769	NA	NA	NA	NA	19.6247	NA	NA	NA	NA	NA	NA	NA	19.0924	NA	14.7236	NA	NA	NA	16.9472	NA	NA	NA	15.3502	19.2063	18.2597	NA	NA	NA	14.0088	NA	NA	NA	NA	15.9095	NA	NA	NA	NA	NA	33.1605	24.881	NA	16.2268	NA
C3L-03513-N	Normal	PDA	NA	20.9277	NA	NA	NA	NA	NA	NA	NA	NA	NA	NA	NA	NA	NA	NA	NA	NA	NA	NA	NA	NA	NA	NA	NA	NA	NA	NA	NA	NA	NA	NA	NA	NA	NA	NA	NA	NA	NA	20.9277	NA	NA	32.6992	23.3834	NA	NA	NA
C3L-03514-N	Normal	PDA	NA	22.015	NA	NA	NA	NA	NA	NA	NA	NA	NA	NA	NA	NA	NA	NA	NA	NA	NA	NA	NA	NA	NA	NA	NA	NA	NA	NA	NA	NA	NA	NA	NA	NA	NA	NA	NA	NA	NA	22.015	NA	NA	31.3795	23.6132	NA	NA	NA
C3L-03515-N	Normal	PDA	NA	20.798	NA	NA	NA	NA	NA	NA	NA	NA	NA	NA	NA	NA	NA	NA	NA	NA	NA	NA	NA	NA	NA	NA	NA	NA	NA	NA	NA	NA	NA	NA	NA	NA	NA	NA	NA	NA	NA	20.798	NA	NA	30.885	23.4401	NA	NA	NA
C3L-03628-N	Normal	PDA	NA	16.4365	NA	NA	NA	NA	NA	NA	NA	NA	NA	NA	NA	NA	NA	17.8848	NA	15.8375	NA	NA	NA	NA	NA	NA	NA	NA	18.5666	NA	NA	NA	NA	17.195	NA	NA	NA	NA	NA	12.6986	NA	NA	NA	NA	31.6594	24.5352	NA	NA	NA
C3L-03628-T	Tumor	PDA	NA	16.4206	NA	NA	NA	NA	NA	NA	NA	NA	NA	NA	NA	NA	NA	18.4799	NA	15.7716	NA	NA	NA	NA	NA	NA	NA	NA	18.2269	NA	NA	NA	NA	16.4585	NA	NA	NA	NA	NA	13.1661	NA	NA	NA	NA	32.1418	24.0841	NA	NA	NA
C3L-03630-N	Normal	PDA	NA	16.8045	NA	NA	NA	NA	NA	NA	NA	NA	NA	NA	NA	NA	NA	NA	NA	NA	NA	NA	16.8045	NA	NA	NA	NA	NA	NA	NA	NA	NA	NA	NA	NA	NA	NA	NA	NA	NA	NA	NA	NA	NA	30.9004	23.6898	NA	NA	17.9879
C3L-03630-T	Tumor	PDA	NA	17.4248	NA	NA	NA	NA	NA	NA	NA	NA	NA	NA	NA	NA	NA	NA	NA	NA	NA	NA	17.4248	NA	NA	NA	NA	NA	NA	NA	NA	NA	NA	NA	NA	NA	NA	NA	NA	NA	NA	NA	NA	NA	31.6501	24.3218	NA	NA	18.1461
C3L-03632-N	Normal	PDA	NA	16.926	NA	NA	NA	NA	NA	NA	NA	NA	NA	NA	NA	NA	NA	16.8233	NA	NA	NA	NA	17.0286	NA	NA	NA	NA	NA	NA	NA	NA	NA	NA	NA	NA	NA	NA	NA	NA	NA	NA	NA	NA	NA	31.0074	24.3161	NA	NA	NA
C3L-03632-T	Tumor	PDA	NA	17.3954	NA	NA	NA	NA	NA	NA	NA	NA	NA	NA	NA	NA	NA	17.6874	NA	NA	NA	NA	17.1034	NA	NA	NA	NA	NA	NA	NA	NA	NA	NA	NA	NA	NA	NA	NA	NA	NA	NA	NA	NA	NA	31.6137	23.9355	NA	NA	NA
C3L-03635-T	Tumor	PDA	18.4094	18.1753	0.136296	NA	NA	NA	NA	NA	NA	NA	NA	NA	NA	NA	NA	18.1753	NA	NA	NA	NA	NA	NA	NA	NA	NA	NA	NA	NA	NA	NA	NA	NA	NA	NA	NA	NA	NA	NA	NA	NA	NA	NA	32.7795	24.3511	NA	NA	20.0721
C3L-03639-N	Normal	PDA	NA	18.1157	NA	NA	NA	NA	NA	18.7046	NA	NA	NA	NA	NA	NA	NA	18.0401	NA	NA	NA	NA	17.6025	NA	NA	NA	NA	NA	NA	NA	NA	NA	NA	NA	NA	NA	NA	NA	NA	NA	NA	NA	NA	NA	30.7301	23.8126	NA	NA	NA
C3L-03639-T	Tumor	PDA	NA	19.1646	NA	NA	NA	NA	NA	19.7345	NA	NA	NA	NA	NA	NA	NA	19.685	NA	NA	NA	NA	18.0742	NA	NA	NA	NA	NA	NA	NA	NA	NA	NA	NA	NA	NA	NA	NA	NA	NA	NA	NA	NA	NA	31.127	24.8469	NA	NA	NA
C3L-03678-T	Tumor	LSCC	21.3206	18.8767	0.66624	NA	17.5922	NA	NA	NA	NA	NA	NA	NA	NA	NA	NA	NA	NA	NA	NA	NA	NA	NA	NA	NA	NA	NA	20.0328	19.7813	NA	NA	NA	NA	NA	NA	NA	NA	18.1005	NA	NA	NA	NA	NA	31.2053	26.7174	NA	19.0084	20.2005
C3L-03681-T	Tumor	GBM	19.1022	17.5463	-0.533474	NA	NA	NA	NA	NA	NA	NA	NA	NA	NA	NA	NA	NA	NA	NA	NA	NA	NA	NA	NA	NA	NA	NA	20.5549	18.9667	NA	NA	14.5286	NA	NA	NA	NA	NA	NA	16.1352	NA	NA	NA	NA	32.542	24.9911	NA	NA	19.3269
C3L-03727-T	Tumor	GBM	NA	18.4125	NA	NA	NA	NA	NA	NA	NA	NA	NA	NA	NA	NA	NA	NA	NA	NA	NA	NA	NA	NA	NA	NA	NA	NA	NA	18.4125	NA	NA	NA	NA	NA	NA	NA	NA	NA	NA	NA	NA	NA	NA	33.3324	24.9176	NA	NA	NA
C3L-03728-T	Tumor	GBM	18.5394	16.5592	-1.48751	NA	NA	NA	NA	NA	NA	NA	NA	NA	NA	NA	NA	NA	NA	NA	NA	NA	NA	NA	NA	NA	NA	NA	19.377	17.124	NA	NA	13.9704	NA	NA	NA	NA	NA	NA	15.7652	NA	NA	NA	NA	33.3733	24.6192	NA	NA	19.2766
C3L-03743-N	Normal	PDA	19.4043	16.4107	-1.6869	15.3513	NA	NA	NA	NA	NA	NA	NA	NA	NA	NA	NA	18.1628	NA	15.5746	NA	NA	NA	NA	NA	NA	NA	NA	18.8639	16.1758	NA	NA	NA	17.1248	NA	NA	NA	NA	NA	13.6218	NA	NA	NA	NA	30.9898	24.608	NA	NA	17.5823
C3L-03743-T	Tumor	PDA	19.4053	16.2319	-1.86578	15.2362	NA	NA	NA	NA	NA	NA	NA	NA	NA	NA	NA	18.2573	NA	15.8241	NA	NA	NA	NA	NA	NA	NA	NA	18.8373	15.9338	NA	NA	NA	16.5568	NA	NA	NA	NA	NA	12.9779	NA	NA	NA	NA	32.0992	24.4705	NA	NA	19.2887
C3L-03744-T	Tumor	GBM	NA	17.4447	NA	NA	13.505	NA	NA	19.8163	NA	NA	NA	NA	NA	NA	NA	NA	NA	NA	NA	NA	NA	NA	NA	NA	NA	NA	18.8762	17.5814	NA	NA	NA	NA	NA	NA	NA	NA	NA	NA	NA	NA	NA	NA	33.0688	25.2029	NA	NA	NA
C3L-03748-T	Tumor	GBM	NA	18.0947	NA	NA	NA	NA	NA	NA	NA	NA	NA	NA	NA	NA	NA	NA	NA	14.9702	NA	NA	NA	NA	NA	NA	NA	NA	21.0176	18.2963	NA	NA	NA	NA	NA	NA	NA	NA	NA	NA	NA	NA	NA	NA	33.2017	24.9568	NA	NA	NA
C3L-03961-N	Normal	LSCC	19.8717	17.0213	-1.10386	NA	NA	NA	NA	19.1074	NA	NA	NA	NA	NA	NA	NA	17.8518	NA	NA	NA	NA	NA	NA	NA	NA	NA	NA	16.6269	18.3481	NA	NA	NA	11.8708	NA	NA	NA	NA	18.3228	NA	NA	NA	NA	NA	32.1103	24.7921	NA	NA	19.9377
C3L-03961-T	Tumor	LSCC	21.2675	18.0579	-0.149493	NA	NA	NA	NA	20.7812	NA	NA	NA	NA	NA	NA	NA	20.2383	NA	NA	NA	NA	NA	NA	NA	NA	NA	NA	17.3727	19.1503	NA	NA	NA	13.1004	NA	NA	NA	NA	17.7044	NA	NA	NA	NA	NA	31.682	25.6661	NA	NA	19.8042
C3L-03962-N	Normal	LSCC	20.1346	17.9728	-0.167806	NA	NA	17.0416	NA	19.4446	NA	NA	NA	NA	NA	NA	NA	NA	NA	19.4189	NA	NA	17.5862	NA	NA	NA	18.4966	NA	18.3592	18.4178	NA	NA	NA	17.2552	NA	NA	NA	NA	NA	NA	15.7352	NA	NA	NA	32.0189	25.122	NA	NA	20.4069
C3L-03962-T	Tumor	LSCC	22.948	19.9464	1.6401	NA	NA	16.8369	NA	22.3392	NA	NA	NA	NA	NA	NA	NA	22.2152	NA	20.5318	NA	NA	20.2654	NA	NA	NA	19.7161	NA	21.1983	21.2228	NA	NA	NA	18.9364	NA	NA	NA	NA	NA	NA	16.2024	NA	NA	NA	31.2998	26.3367	NA	NA	19.9182
C3L-03963-N	Normal	LSCC	20.1596	18.741	0.59891	NA	NA	NA	NA	19.4806	NA	NA	NA	NA	NA	NA	NA	18.5755	NA	18.8682	NA	NA	NA	NA	NA	NA	18.3913	NA	19.8073	18.4454	NA	NA	NA	NA	NA	NA	NA	NA	17.6188	NA	NA	NA	NA	NA	32.0345	25.4018	NA	NA	NA
C3L-03963-T	Tumor	LSCC	22.2002	20.1674	1.9051	NA	NA	NA	NA	21.8858	NA	NA	NA	NA	NA	NA	NA	21.2283	NA	20.0613	NA	NA	NA	NA	NA	NA	18.6332	NA	20.6996	20.4175	NA	NA	NA	NA	NA	NA	NA	NA	18.2462	NA	NA	NA	NA	NA	31.1694	26.4276	NA	NA	NA
C3L-03965-N	Normal	LSCC	20.8011	16.8905	-1.2894	NA	16.758	16.5036	NA	20.0851	NA	NA	NA	NA	NA	12.2887	NA	NA	NA	NA	NA	NA	18.1181	NA	NA	NA	18.1663	NA	17.4205	19.0404	NA	NA	NA	NA	NA	NA	NA	NA	18.0346	NA	14.7696	NA	14.6105	NA	32.4588	25.5199	NA	18.2678	20.7894
C3L-03965-T	Tumor	LSCC	21.5632	17.6604	-0.564354	NA	17.3438	16.5264	NA	21.0507	NA	NA	NA	NA	NA	14.2222	NA	NA	NA	NA	NA	NA	19.1744	NA	NA	NA	19.1522	NA	18.0207	19.9225	NA	NA	NA	NA	NA	NA	NA	NA	18.0239	NA	15.6108	NA	15.217	NA	31.496	26.5309	NA	18.9343	20.4055
C3L-03968-T	Tumor	GBM	NA	19.3167	NA	NA	14.6023	NA	NA	21.4991	NA	NA	NA	NA	NA	NA	NA	NA	NA	NA	NA	NA	NA	NA	NA	NA	NA	NA	21.145	20.0205	NA	NA	NA	NA	NA	NA	NA	NA	NA	NA	NA	NA	NA	NA	32.3475	26.6904	NA	NA	NA
C3L-04013-N	Normal	LSCC	20.6805	17.3629	-0.809853	15.5478	17.0937	NA	NA	19.0582	NA	NA	NA	NA	NA	NA	NA	NA	NA	NA	NA	12.9818	17.7654	NA	NA	NA	18.7404	NA	18.9479	NA	NA	NA	NA	18.3883	NA	NA	NA	NA	17.7429	NA	NA	NA	NA	NA	31.859	25.794	15.7585	18.5437	NA
C3L-04013-T	Tumor	LSCC	22.452	19.1313	0.85412	18.1427	17.1646	NA	NA	22.0074	NA	NA	NA	NA	NA	NA	NA	20.5502	NA	NA	NA	14.7102	18.7826	NA	NA	NA	18.7852	NA	21.2593	21.1805	NA	NA	NA	18.7569	NA	NA	NA	NA	19.1043	NA	NA	NA	NA	NA	30.6197	27.988	16.4544	20.6905	NA
C3L-04014-N	Normal	LSCC	20.379	17.9834	-0.171626	NA	NA	NA	NA	NA	NA	NA	NA	NA	NA	NA	NA	18.1792	NA	18.659	NA	NA	17.7296	NA	NA	NA	18.1406	NA	16.9166	18.2754	NA	NA	NA	NA	NA	NA	NA	NA	NA	NA	NA	NA	NA	NA	32.3191	25.5971	NA	NA	21.6399
C3L-04014-T	Tumor	LSCC	22.2511	20.2118	1.94651	NA	NA	NA	NA	NA	NA	NA	NA	NA	NA	NA	NA	21.7536	NA	19.9127	NA	NA	20.8372	NA	NA	NA	19.3627	NA	18.6558	20.7488	NA	NA	NA	NA	NA	NA	NA	NA	NA	NA	NA	NA	NA	NA	31.3454	26.3683	NA	NA	20.1662
C3L-04025-T	Tumor	HNSCC	18.5109	17.2308	-0.8142	NA	NA	14.3101	NA	19.5234	NA	NA	NA	NA	NA	NA	NA	16.5253	NA	NA	NA	NA	NA	NA	NA	16.5381	NA	NA	20.4062	16.3617	NA	NA	NA	NA	NA	NA	NA	NA	NA	NA	NA	NA	NA	16.9507	32.0393	24.8168	NA	NA	NA
C3L-04027-T	Tumor	PDA	NA	19.3611	NA	NA	NA	NA	NA	NA	NA	NA	NA	NA	NA	NA	NA	19.7563	NA	NA	NA	NA	NA	NA	NA	NA	NA	NA	NA	NA	NA	NA	NA	NA	NA	NA	NA	NA	NA	NA	NA	18.966	NA	NA	31.8432	24.5292	NA	NA	NA
C3L-04071-N	Normal	LSCC	20.4198	17.3779	-0.779536	NA	NA	16.328	NA	19.6912	NA	NA	NA	NA	NA	NA	NA	NA	NA	NA	NA	NA	NA	NA	NA	NA	18.3501	NA	19.32	19.1252	NA	NA	NA	11.4529	NA	NA	NA	NA	NA	NA	NA	NA	NA	NA	31.8402	25.2256	NA	NA	20.2842
C3L-04071-T	Tumor	LSCC	21.5413	18.432	0.208465	NA	NA	16.5587	NA	21.5186	NA	NA	NA	NA	NA	NA	NA	NA	NA	NA	NA	NA	NA	NA	NA	NA	19.1531	NA	20.5721	19.7771	NA	NA	NA	13.0122	NA	NA	NA	NA	NA	NA	NA	NA	NA	NA	31.3791	25.9935	NA	NA	20.471
C3L-04072-N	Normal	PDA	NA	18.2388	NA	NA	NA	NA	NA	18.7445	NA	NA	NA	NA	NA	NA	NA	17.9948	NA	NA	NA	NA	NA	NA	NA	NA	NA	NA	17.9771	NA	NA	NA	NA	NA	NA	NA	NA	NA	NA	NA	NA	NA	NA	NA	31.0779	23.8169	NA	NA	NA
C3L-04072-T	Tumor	PDA	NA	19.8255	NA	NA	NA	NA	NA	19.6451	NA	NA	NA	NA	NA	NA	NA	20.0429	NA	NA	NA	NA	NA	NA	NA	NA	NA	NA	19.7884	NA	NA	NA	NA	NA	NA	NA	NA	NA	NA	NA	NA	NA	NA	NA	31.075	25.5747	NA	NA	NA
C3L-04080-T	Tumor	PDA	NA	18.2362	NA	NA	NA	NA	NA	18.543	NA	NA	NA	NA	NA	NA	NA	18.2295	NA	NA	NA	NA	NA	NA	NA	NA	NA	NA	17.936	NA	NA	NA	NA	NA	NA	NA	NA	NA	NA	NA	NA	NA	NA	NA	31.2285	24.4237	NA	NA	NA
C3L-04084-T	Tumor	GBM	NA	17.9756	NA	NA	13.8766	NA	NA	19.724	NA	NA	NA	NA	NA	NA	NA	NA	NA	NA	NA	NA	NA	NA	NA	NA	NA	NA	19.7412	18.5607	NA	NA	NA	NA	NA	NA	NA	NA	NA	NA	NA	NA	NA	NA	32.6715	26.1592	NA	NA	NA
C3L-04354-N	Normal	HNSCC	18.2499	17.0581	-0.97151	NA	NA	14.3583	NA	19.3826	NA	NA	NA	NA	NA	NA	NA	16.0338	NA	NA	NA	NA	NA	NA	NA	15.7882	NA	NA	20.7653	17.709	NA	NA	NA	NA	NA	NA	NA	NA	NA	NA	NA	NA	NA	15.3696	32.1016	24.7749	NA	NA	NA
C3L-04354-T	Tumor	HNSCC	19.074	17.7924	-0.285781	NA	NA	15.033	NA	20.6958	NA	NA	NA	NA	NA	NA	NA	16.3543	NA	NA	NA	NA	NA	NA	NA	16.8255	NA	NA	21.2385	18.1945	NA	NA	NA	NA	NA	NA	NA	NA	NA	NA	NA	NA	NA	16.2051	31.3686	25.79	NA	NA	NA
C3L-04391-N	Normal	LSCC	20.5424	18.8702	0.705506	NA	NA	NA	NA	18.7966	NA	NA	NA	NA	NA	NA	NA	NA	NA	NA	NA	NA	NA	NA	NA	NA	NA	NA	19.2705	20.1248	NA	NA	NA	NA	NA	NA	NA	NA	17.2887	NA	NA	NA	NA	NA	32.009	25.0569	NA	18.2925	21.2989
C3L-04391-T	Tumor	LSCC	21.573	20.0214	1.79604	NA	NA	NA	NA	21.3451	NA	NA	NA	NA	NA	NA	NA	20.3869	NA	NA	NA	NA	18.6483	NA	NA	NA	NA	NA	20.7538	20.142	NA	NA	NA	NA	NA	NA	NA	NA	18.8523	NA	NA	NA	NA	NA	31.6931	25.7369	NA	18.1782	20.6442
C3L-04473-N	Normal	PDA	23.2657	18.432	0.106893	NA	NA	NA	NA	18.432	NA	NA	NA	NA	NA	NA	NA	NA	NA	NA	NA	NA	NA	NA	NA	NA	NA	NA	NA	NA	NA	NA	NA	NA	NA	NA	NA	NA	NA	NA	NA	NA	NA	NA	30.7095	23.9219	NA	NA	NA
C3L-04473-T	Tumor	PDA	19.6643	18.7382	0.625286	NA	NA	NA	NA	18.7382	NA	NA	NA	NA	NA	NA	NA	NA	NA	NA	NA	NA	NA	NA	NA	NA	NA	NA	NA	NA	NA	NA	NA	NA	NA	NA	NA	NA	NA	NA	NA	NA	NA	NA	31.5491	24.2587	NA	NA	NA
C3L-04475-N	Normal	PDA	19.357	19.0181	0.923227	NA	NA	NA	NA	19.0181	NA	NA	NA	NA	NA	NA	NA	NA	NA	NA	NA	NA	NA	NA	NA	NA	NA	NA	NA	NA	NA	NA	NA	NA	NA	NA	NA	NA	NA	NA	NA	NA	NA	NA	31.536	25.3491	NA	NA	NA
C3L-04475-T	Tumor	PDA	19.3898	17.959	-0.137741	NA	NA	NA	NA	17.959	NA	NA	NA	NA	NA	NA	NA	NA	NA	NA	NA	NA	NA	NA	NA	NA	NA	NA	NA	NA	NA	NA	NA	NA	NA	NA	NA	NA	NA	NA	NA	NA	NA	NA	32.4118	23.6734	NA	NA	NA
C3L-04479-N	Normal	PDA	NA	16.2877	NA	NA	NA	NA	NA	NA	NA	NA	NA	NA	NA	NA	NA	16.2008	NA	16.3746	NA	NA	NA	NA	NA	NA	NA	NA	NA	NA	NA	NA	NA	NA	NA	NA	NA	NA	NA	NA	NA	NA	NA	NA	30.4535	24.0223	NA	NA	NA
C3L-04479-T	Tumor	PDA	NA	17.7589	NA	NA	NA	NA	NA	NA	NA	NA	NA	NA	NA	NA	NA	19.3873	NA	16.1304	NA	NA	NA	NA	NA	NA	NA	NA	NA	NA	NA	NA	NA	NA	NA	NA	NA	NA	NA	NA	NA	NA	NA	NA	31.8722	24.4038	NA	NA	NA
C3L-04495-N	Normal	PDA	NA	18.3104	NA	NA	NA	NA	NA	18.3132	NA	NA	NA	NA	NA	NA	NA	NA	NA	NA	NA	NA	NA	NA	NA	NA	NA	NA	18.3077	NA	NA	NA	NA	NA	NA	NA	NA	NA	NA	NA	NA	NA	NA	NA	30.9987	23.5218	NA	NA	NA
C3L-04495-T	Tumor	PDA	NA	18.7813	NA	NA	NA	NA	NA	18.8128	NA	NA	NA	NA	NA	NA	NA	NA	NA	NA	NA	NA	NA	NA	NA	NA	NA	NA	18.7498	NA	NA	NA	NA	NA	NA	NA	NA	NA	NA	NA	NA	NA	NA	NA	31.7663	24.1305	NA	NA	NA
C3L-04791-T	Tumor	HNSCC	18.7077	17.2556	-0.80102	NA	14.7117	NA	NA	20.3766	NA	NA	NA	NA	NA	NA	NA	NA	NA	NA	NA	NA	NA	NA	NA	NA	18.1898	NA	17.691	18.2887	NA	NA	NA	18.75	13.5962	NA	NA	NA	16.8377	18.5613	16.4946	NA	NA	16.3136	31.6884	25.2964	NA	11.186	NA
C3L-04844-N	Normal	HNSCC	18.0976	18.2392	0.218553	NA	NA	NA	NA	19.9454	NA	NA	NA	NA	NA	NA	NA	NA	NA	15.0646	NA	NA	NA	NA	NA	NA	18.1879	NA	21.1918	17.623	NA	NA	NA	NA	NA	NA	NA	NA	NA	NA	NA	19.6951	NA	15.9665	31.4923	25.4872	NA	NA	19.9842
C3L-04844-T	Tumor	HNSCC	19.7334	18.8606	0.743577	NA	NA	NA	NA	20.9696	NA	NA	NA	NA	NA	NA	NA	NA	NA	15.0538	NA	NA	NA	NA	NA	NA	18.9286	NA	22.0242	19.2104	NA	NA	NA	NA	NA	NA	NA	NA	NA	NA	NA	19.7318	NA	16.1055	30.8566	25.1216	NA	NA	20.9921
C3L-04848-N	Normal	PDA	NA	17.8399	NA	NA	NA	NA	NA	NA	NA	NA	NA	NA	NA	NA	NA	17.6417	NA	NA	NA	NA	NA	NA	NA	NA	NA	NA	18.038	NA	NA	NA	NA	NA	NA	NA	NA	NA	NA	NA	NA	NA	NA	NA	31.3708	23.0135	NA	NA	17.5553
C3L-04848-T	Tumor	PDA	NA	18.9107	NA	NA	NA	NA	NA	NA	NA	NA	NA	NA	NA	NA	NA	18.8678	NA	NA	NA	NA	NA	NA	NA	NA	NA	NA	18.9536	NA	NA	NA	NA	NA	NA	NA	NA	NA	NA	NA	NA	NA	NA	NA	32.2913	24.1276	NA	NA	17.6927
C3L-04849-T	Tumor	HNSCC	19.9672	18.699	0.568204	NA	NA	NA	NA	20.6569	NA	NA	NA	NA	NA	NA	NA	17.5772	NA	NA	NA	NA	NA	NA	NA	NA	18.1743	NA	21.5996	18.6026	NA	NA	NA	NA	NA	NA	NA	NA	17.1377	NA	17.1445	NA	NA	NA	30.9837	26.2127	NA	NA	22.185
C3L-04853-N	Normal	PDA	NA	18.7461	NA	NA	NA	NA	NA	NA	NA	NA	NA	NA	NA	NA	NA	18.4186	NA	NA	NA	NA	NA	NA	NA	NA	NA	NA	NA	NA	NA	NA	NA	NA	NA	NA	NA	NA	NA	NA	NA	19.0736	NA	NA	31.9003	23.5913	NA	NA	17.1487
C3L-04853-T	Tumor	PDA	NA	19.0458	NA	NA	NA	NA	NA	NA	NA	NA	NA	NA	NA	NA	NA	19.0454	NA	NA	NA	NA	NA	NA	NA	NA	NA	NA	NA	NA	NA	NA	NA	NA	NA	NA	NA	NA	NA	NA	NA	19.0462	NA	NA	31.4829	23.9173	NA	NA	18.7635
C3L-07032-N	Normal	PDA	NA	22.4361	NA	NA	NA	NA	NA	NA	NA	NA	NA	NA	NA	NA	NA	NA	NA	NA	NA	NA	NA	NA	NA	NA	NA	NA	NA	NA	NA	NA	NA	NA	NA	NA	NA	NA	NA	NA	NA	22.4361	NA	NA	30.9939	23.1704	NA	NA	NA
C3L-07033-N	Normal	PDA	NA	21.3616	NA	NA	NA	NA	NA	NA	NA	NA	NA	NA	NA	NA	NA	NA	NA	NA	NA	NA	NA	NA	NA	NA	NA	NA	NA	NA	NA	NA	NA	NA	NA	NA	NA	NA	NA	NA	NA	21.3616	NA	NA	31.1377	23.0745	NA	NA	NA
C3L-07034-N	Normal	PDA	NA	19.6526	NA	NA	NA	NA	NA	NA	NA	NA	NA	NA	NA	NA	NA	NA	NA	NA	NA	NA	NA	NA	NA	NA	NA	NA	NA	NA	NA	NA	NA	NA	NA	NA	NA	NA	NA	NA	NA	19.6526	NA	NA	30.7597	23.2105	NA	NA	NA
C3L-07035-N	Normal	PDA	NA	20.0761	NA	NA	NA	NA	NA	NA	NA	NA	NA	NA	NA	NA	NA	NA	NA	NA	NA	NA	NA	NA	NA	NA	NA	NA	NA	NA	NA	NA	NA	NA	NA	NA	NA	NA	NA	NA	NA	20.0761	NA	NA	31.2445	22.9505	NA	NA	NA
C3L-07036-N	Normal	PDA	NA	19.7914	NA	NA	NA	NA	NA	NA	NA	NA	NA	NA	NA	NA	NA	NA	NA	NA	NA	NA	NA	NA	NA	NA	NA	NA	NA	NA	NA	NA	NA	NA	NA	NA	NA	NA	NA	NA	NA	19.7914	NA	NA	30.9294	22.8123	NA	NA	NA
C3N-00148-N	Normal	CCRCC	18.0849	15.9824	-2.03746	NA	NA	NA	NA	NA	NA	NA	NA	NA	NA	NA	NA	NA	NA	NA	NA	NA	15.317	NA	NA	NA	NA	NA	17.4705	15.1598	NA	NA	NA	NA	NA	NA	NA	NA	NA	NA	NA	NA	NA	NA	30.4078	23.3519	NA	NA	20.4327
C3N-00148-T	Tumor	CCRCC	18.6213	16.3221	-1.72938	NA	NA	NA	NA	NA	NA	NA	NA	NA	NA	NA	NA	NA	NA	NA	NA	NA	15.9428	NA	NA	NA	NA	NA	17.4277	15.5958	NA	NA	NA	NA	NA	NA	NA	NA	NA	NA	NA	NA	NA	NA	31.9937	23.9963	NA	NA	21.6797
C3N-00149-N	Normal	CCRCC	NA	NA	NA	NA	NA	NA	NA	NA	NA	NA	NA	NA	NA	NA	NA	NA	NA	NA	NA	NA	NA	NA	NA	NA	NA	NA	NA	NA	NA	NA	NA	NA	NA	NA	NA	NA	NA	NA	NA	NA	NA	NA	31.2859	23.1192	NA	NA	20.8972
C3N-00149-T	Tumor	CCRCC	NA	NA	NA	NA	NA	NA	NA	NA	NA	NA	NA	NA	NA	NA	NA	NA	NA	NA	NA	NA	NA	NA	NA	NA	NA	NA	NA	NA	NA	NA	NA	NA	NA	NA	NA	NA	NA	NA	NA	NA	NA	NA	32.0349	24.2295	NA	NA	21.1317
C3N-00150-N	Normal	CCRCC	NA	NA	NA	NA	NA	NA	NA	NA	NA	NA	NA	NA	NA	NA	NA	NA	NA	NA	NA	NA	NA	NA	NA	NA	NA	NA	NA	NA	NA	NA	NA	NA	NA	NA	NA	NA	NA	NA	NA	NA	NA	NA	30.6228	22.9931	NA	NA	20.7302
C3N-00150-T	Tumor	CCRCC	NA	NA	NA	NA	NA	NA	NA	NA	NA	NA	NA	NA	NA	NA	NA	NA	NA	NA	NA	NA	NA	NA	NA	NA	NA	NA	NA	NA	NA	NA	NA	NA	NA	NA	NA	NA	NA	NA	NA	NA	NA	NA	31.5988	23.739	NA	NA	21.7161
C3N-00151-T	Tumor	UCEC	NA	18.9699	NA	NA	NA	17.983	NA	22.6914	NA	NA	NA	17.9829	NA	NA	NA	19.1885	16.1421	19.8874	NA	NA	NA	NA	NA	NA	NA	NA	20.3316	21.1314	NA	18.4205	NA	17.1647	NA	NA	NA	NA	17.9396	NA	18.7754	NA	NA	NA	31.4934	25.8341	NA	21.6419	21.1709
C3N-00154-T	Tumor	CCRCC	NA	NA	NA	NA	NA	NA	NA	NA	NA	NA	NA	NA	NA	NA	NA	NA	NA	NA	NA	NA	NA	NA	NA	NA	NA	NA	NA	NA	NA	NA	NA	NA	NA	NA	NA	NA	NA	NA	NA	NA	NA	NA	31.6004	24.0689	NA	NA	20.9251
C3N-00167-N	Normal	LUAD	NA	16.7366	NA	NA	NA	NA	NA	NA	NA	NA	NA	NA	NA	NA	NA	15.8876	NA	15.6889	NA	NA	17.6523	NA	NA	NA	17.5464	NA	18.0405	17.9551	NA	NA	NA	NA	NA	NA	NA	NA	NA	NA	NA	NA	NA	14.3854	32.4854	24.0594	NA	NA	19.8569
C3N-00167-T	Tumor	LUAD	NA	17.2986	NA	NA	NA	NA	NA	NA	NA	NA	NA	NA	NA	NA	NA	17.5821	NA	16.384	NA	NA	18.1634	NA	NA	NA	17.4668	NA	19.2254	18.2679	NA	NA	NA	NA	NA	NA	NA	NA	NA	NA	NA	NA	NA	14.0007	31.8746	24.9847	NA	NA	20.0198
C3N-00168-N	Normal	CCRCC	NA	NA	NA	NA	NA	NA	NA	NA	NA	NA	NA	NA	NA	NA	NA	NA	NA	NA	NA	NA	NA	NA	NA	NA	NA	NA	NA	NA	NA	NA	NA	NA	NA	NA	NA	NA	NA	NA	NA	NA	NA	NA	30.3457	23.2491	NA	NA	20.409
C3N-00168-T	Tumor	CCRCC	NA	NA	NA	NA	NA	NA	NA	NA	NA	NA	NA	NA	NA	NA	NA	NA	NA	NA	NA	NA	NA	NA	NA	NA	NA	NA	NA	NA	NA	NA	NA	NA	NA	NA	NA	NA	NA	NA	NA	NA	NA	NA	31.4098	24.124	NA	NA	22.0808
C3N-00169-N	Normal	LUAD	21.0306	15.1883	-3.00511	NA	NA	NA	NA	NA	NA	NA	NA	NA	NA	NA	NA	15.9673	NA	NA	NA	NA	17.7738	NA	NA	NA	NA	NA	NA	NA	NA	NA	NA	NA	NA	NA	NA	NA	11.8238	NA	NA	NA	NA	NA	32.4323	24.5012	NA	NA	20.0243
C3N-00169-T	Tumor	LUAD	22.8532	18.0715	-0.229259	NA	NA	NA	NA	NA	NA	NA	NA	NA	NA	NA	NA	19.6827	NA	NA	NA	NA	20.751	NA	NA	NA	NA	NA	NA	NA	NA	NA	NA	NA	NA	NA	NA	NA	13.7807	NA	NA	NA	NA	NA	31.7832	26.6539	NA	NA	19.2919
C3N-00175-N	Normal	LUAD	NA	17.18	NA	NA	NA	NA	NA	NA	NA	NA	NA	NA	NA	NA	NA	NA	NA	NA	NA	NA	17.18	NA	NA	NA	NA	NA	NA	NA	NA	NA	NA	NA	NA	NA	NA	NA	NA	NA	NA	NA	NA	NA	32.0194	24.3972	NA	NA	20.1463
C3N-00175-T	Tumor	LUAD	NA	19.0533	NA	NA	NA	NA	NA	NA	NA	NA	NA	NA	NA	NA	NA	NA	NA	NA	NA	NA	19.0533	NA	NA	NA	NA	NA	NA	NA	NA	NA	NA	NA	NA	NA	NA	NA	NA	NA	NA	NA	NA	NA	32.0543	24.9412	NA	NA	21.3961
C3N-00177-N	Normal	CCRCC	NA	12.326	NA	NA	NA	NA	NA	NA	NA	NA	NA	NA	NA	NA	NA	NA	NA	NA	NA	NA	NA	NA	NA	NA	NA	NA	NA	NA	NA	NA	NA	NA	12.326	NA	NA	NA	NA	NA	NA	NA	NA	NA	30.4741	22.9699	NA	NA	20.2602
C3N-00177-T	Tumor	CCRCC	NA	14.0284	NA	NA	NA	NA	NA	NA	NA	NA	NA	NA	NA	NA	NA	NA	NA	NA	NA	NA	NA	NA	NA	NA	NA	NA	NA	NA	NA	NA	NA	NA	14.0284	NA	NA	NA	NA	NA	NA	NA	NA	NA	31.0092	24.2267	NA	NA	21.9184
C3N-00180-N	Normal	LUAD	21.5212	17.5075	-0.714828	NA	NA	NA	NA	NA	NA	NA	NA	NA	NA	NA	NA	15.5274	NA	NA	NA	NA	17.2184	NA	NA	NA	17.715	NA	18.8552	18.2215	NA	NA	NA	NA	NA	NA	NA	NA	NA	NA	NA	NA	NA	NA	32.4873	24.2881	NA	NA	19.9104
C3N-00180-T	Tumor	LUAD	22.2237	19.6906	1.42695	NA	NA	NA	NA	NA	NA	NA	NA	NA	NA	NA	NA	19.9053	NA	NA	NA	NA	20.2861	NA	NA	NA	18.8426	NA	20.1262	19.293	NA	NA	NA	NA	NA	NA	NA	NA	NA	NA	NA	NA	NA	NA	31.1284	25.4393	NA	NA	19.9076
C3N-00194-N	Normal	CCRCC	NA	NA	NA	NA	NA	NA	NA	NA	NA	NA	NA	NA	NA	NA	NA	NA	NA	NA	NA	NA	NA	NA	NA	NA	NA	NA	NA	NA	NA	NA	NA	NA	NA	NA	NA	NA	NA	NA	NA	NA	NA	NA	30.5668	22.792	NA	NA	20.3848
C3N-00194-T	Tumor	CCRCC	NA	NA	NA	NA	NA	NA	NA	NA	NA	NA	NA	NA	NA	NA	NA	NA	NA	NA	NA	NA	NA	NA	NA	NA	NA	NA	NA	NA	NA	NA	NA	NA	NA	NA	NA	NA	NA	NA	NA	NA	NA	NA	31.6659	23.9373	NA	NA	21.7227
C3N-00198-N	Normal	PDA	NA	20.4758	NA	NA	NA	NA	NA	NA	NA	NA	NA	NA	NA	NA	NA	17.4278	NA	NA	NA	NA	NA	NA	NA	NA	NA	NA	NA	NA	NA	NA	NA	NA	NA	NA	NA	NA	NA	NA	NA	23.5239	NA	NA	32.7181	23.6414	NA	NA	NA
C3N-00198-T	Tumor	PDA	NA	18.2987	NA	NA	NA	NA	NA	NA	NA	NA	NA	NA	NA	NA	NA	16.5643	NA	NA	NA	NA	NA	NA	NA	NA	NA	NA	NA	NA	NA	NA	NA	NA	NA	NA	NA	NA	NA	NA	NA	20.0331	NA	NA	32.3991	24.0341	NA	NA	NA
C3N-00199-N	Normal	LUAD	21.403	16.2762	-1.93913	NA	NA	15.8227	NA	16.7144	NA	NA	NA	NA	NA	NA	NA	NA	NA	15.2816	NA	NA	NA	NA	NA	NA	17.6552	NA	19.027	16.1218	NA	NA	NA	NA	NA	NA	NA	NA	NA	NA	NA	NA	NA	13.3108	32.0377	24.8152	NA	17.1077	20.0998
C3N-00199-T	Tumor	LUAD	23.3218	18.3852	0.0568158	NA	NA	16.4041	NA	19.4054	NA	NA	NA	NA	NA	NA	NA	20.4568	NA	17.3656	NA	NA	NA	NA	NA	NA	19.2369	NA	20.5446	18.4808	NA	NA	NA	NA	NA	NA	NA	NA	NA	NA	NA	NA	NA	15.1872	31.7442	25.5263	NA	18.0598	19.6706
C3N-00200-N	Normal	UCEC	20.2956	18.7699	0.619828	NA	NA	18.1392	NA	21.0032	NA	NA	NA	NA	18.1849	NA	NA	NA	NA	18.382	NA	NA	17.4778	NA	NA	NA	NA	NA	20.8417	NA	NA	NA	NA	NA	NA	NA	NA	NA	NA	NA	17.3609	NA	NA	NA	33.1917	24.815	NA	20.3473	20.335
C3N-00200-T	Tumor	UCEC	18.6996	19.0934	1.03725	NA	NA	18.1364	NA	21.8082	NA	NA	NA	NA	18.3061	NA	NA	NA	NA	18.9227	NA	NA	18.3615	NA	NA	NA	NA	NA	20.5464	NA	NA	NA	NA	NA	NA	NA	NA	NA	NA	NA	17.5722	NA	NA	NA	32.9141	25.6672	NA	20.7771	19.7797
C3N-00203-N	Normal	LUAD	NA	16.9346	NA	NA	NA	15.4937	NA	16.9657	NA	NA	NA	NA	NA	NA	NA	16.6517	NA	16.0524	NA	NA	16.8819	NA	NA	NA	17.6434	NA	18.7748	17.0135	NA	NA	NA	NA	NA	NA	NA	NA	NA	NA	NA	NA	NA	NA	31.8742	24.7132	NA	NA	20.4348
C3N-00203-T	Tumor	LUAD	24.6109	19.2091	0.804806	NA	NA	16.0185	NA	19.6741	NA	NA	NA	NA	NA	NA	NA	21.4563	NA	17.7474	NA	NA	19.9986	NA	NA	NA	19.0594	NA	20.516	19.2024	NA	NA	NA	NA	NA	NA	NA	NA	NA	NA	NA	NA	NA	NA	31.5056	26.2684	NA	NA	20.0331
C3N-00204-N	Normal	HNSCC	19.2967	18.5009	0.409667	NA	NA	NA	NA	19.8339	NA	NA	NA	NA	NA	NA	NA	15.3492	NA	NA	NA	NA	17.7542	NA	NA	NA	NA	NA	20.235	NA	NA	NA	NA	18.4134	NA	NA	NA	NA	NA	NA	NA	19.42	NA	NA	32.1328	25.072	NA	NA	20.2495
C3N-00204-T	Tumor	HNSCC	20.0532	20.014	1.87817	NA	NA	NA	NA	21.6831	NA	NA	NA	NA	NA	NA	NA	17.203	NA	NA	NA	NA	19.8949	NA	NA	NA	NA	NA	22.1358	NA	NA	NA	NA	19.5264	NA	NA	NA	NA	NA	NA	NA	19.6408	NA	NA	30.7091	26.2079	NA	NA	20.2139
C3N-00211-T	Tumor	LSCC	22.3904	20.2596	1.98613	NA	NA	NA	NA	NA	NA	NA	NA	NA	NA	NA	NA	20.5727	NA	20.5463	NA	NA	19.1936	NA	NA	NA	NA	NA	21.2906	20.7428	NA	NA	NA	NA	NA	NA	NA	NA	19.2118	NA	NA	NA	NA	NA	31.6803	26.3793	NA	NA	20.2449
C3N-00217-N	Normal	LUAD	20.9479	16.7428	-1.44578	NA	NA	15.9546	NA	NA	NA	NA	NA	NA	NA	NA	NA	15.8325	NA	16.0021	NA	NA	16.7021	NA	NA	NA	17.7275	NA	NA	18.2377	NA	NA	NA	NA	NA	NA	NA	NA	NA	NA	NA	NA	NA	NA	32.1542	24.799	NA	NA	20.2684
C3N-00217-T	Tumor	LUAD	21.9704	17.5044	-0.744319	NA	NA	15.6886	NA	NA	NA	NA	NA	NA	NA	NA	NA	18.0349	NA	16.3132	NA	NA	18.6496	NA	NA	NA	17.833	NA	NA	18.5073	NA	NA	NA	NA	NA	NA	NA	NA	NA	NA	NA	NA	NA	NA	31.2237	25.6681	NA	NA	21.3039
C3N-00221-N	Normal	LSCC	20.9476	17.4598	-0.728722	15.5396	17.7724	NA	NA	18.9661	NA	NA	NA	NA	NA	NA	NA	17.8709	NA	NA	NA	13.7466	17.6177	NA	NA	NA	19.4873	NA	18.856	NA	NA	NA	NA	17.7988	NA	NA	NA	NA	16.9425	NA	NA	NA	NA	NA	31.9473	25.562	15.837	18.4297	NA
C3N-00221-T	Tumor	LSCC	21.897	19.318	1.07355	18.2053	16.4396	NA	NA	21.8938	NA	NA	NA	NA	NA	NA	NA	22.2995	NA	NA	NA	14.3071	20.8248	NA	NA	NA	18.9566	NA	21.2625	21.2802	NA	NA	NA	18.3843	NA	NA	NA	NA	18.6441	NA	NA	NA	NA	NA	31.0128	26.8065	15.184	19.0496	NA
C3N-00223-N	Normal	LUAD	21.3246	17.631	-0.5797	NA	NA	NA	NA	16.9413	NA	NA	NA	NA	NA	NA	NA	NA	NA	NA	NA	NA	17.502	NA	NA	NA	17.9158	NA	NA	18.1649	NA	NA	NA	NA	NA	NA	NA	NA	NA	NA	NA	NA	NA	NA	32.2922	24.5868	NA	NA	20.3174
C3N-00223-T	Tumor	LUAD	21.1989	18.1097	-0.0936519	NA	NA	NA	NA	17.7685	NA	NA	NA	NA	NA	NA	NA	NA	NA	NA	NA	NA	18.5137	NA	NA	NA	17.7329	NA	NA	18.4236	NA	NA	NA	NA	NA	NA	NA	NA	NA	NA	NA	NA	NA	NA	31.9717	24.6078	NA	NA	20.0305
C3N-00242-N	Normal	CCRCC	NA	NA	NA	NA	NA	NA	NA	NA	NA	NA	NA	NA	NA	NA	NA	NA	NA	NA	NA	NA	NA	NA	NA	NA	NA	NA	NA	NA	NA	NA	NA	NA	NA	NA	NA	NA	NA	NA	NA	NA	NA	NA	31.0828	23.2882	NA	NA	NA
C3N-00242-T	Tumor	CCRCC	NA	NA	NA	NA	NA	NA	NA	NA	NA	NA	NA	NA	NA	NA	NA	NA	NA	NA	NA	NA	NA	NA	NA	NA	NA	NA	NA	NA	NA	NA	NA	NA	NA	NA	NA	NA	NA	NA	NA	NA	NA	NA	31.9243	24.4621	NA	NA	NA
C3N-00244-N	Normal	CCRCC	17.2625	NA	NA	NA	NA	NA	NA	NA	NA	NA	NA	NA	NA	NA	NA	NA	NA	NA	NA	NA	NA	NA	NA	NA	NA	NA	NA	NA	NA	NA	NA	NA	NA	NA	NA	NA	NA	NA	NA	NA	NA	NA	30.1937	22.579	NA	NA	21.1007
C3N-00244-T	Tumor	CCRCC	19.2115	NA	NA	NA	NA	NA	NA	NA	NA	NA	NA	NA	NA	NA	NA	NA	NA	NA	NA	NA	NA	NA	NA	NA	NA	NA	NA	NA	NA	NA	NA	NA	NA	NA	NA	NA	NA	NA	NA	NA	NA	NA	31.3745	24.6606	NA	NA	22.128
C3N-00246-N	Normal	CCRCC	17.9606	16.0652	-1.94735	NA	NA	NA	NA	NA	NA	NA	NA	NA	NA	NA	NA	NA	NA	NA	NA	NA	15.2815	NA	NA	NA	NA	NA	17.3954	15.5188	NA	NA	NA	NA	NA	NA	NA	NA	NA	NA	NA	NA	NA	NA	30.3784	23.3564	NA	NA	20.3013
C3N-00246-T	Tumor	CCRCC	18.7336	16.9341	-1.12401	NA	NA	NA	NA	NA	NA	NA	NA	NA	NA	NA	NA	NA	NA	NA	NA	NA	16.9799	NA	NA	NA	NA	NA	18.0157	15.8067	NA	NA	NA	NA	NA	NA	NA	NA	NA	NA	NA	NA	NA	NA	31.3563	24.7111	NA	NA	21.8644
C3N-00247-T	Tumor	LSCC	21.7916	18.9985	0.760245	NA	17.4142	NA	NA	21.3344	NA	NA	NA	NA	NA	NA	NA	NA	NA	NA	NA	NA	19.3348	NA	NA	NA	19.1348	NA	NA	19.9331	NA	NA	NA	18.1386	NA	NA	NA	NA	17.6994	NA	NA	NA	NA	NA	31.7523	25.9922	15.2914	18.8635	20.4586
C3N-00249-N	Normal	PDA	NA	19.0808	NA	NA	NA	NA	NA	NA	NA	NA	NA	NA	NA	NA	NA	17.1257	NA	NA	NA	NA	NA	NA	NA	NA	NA	NA	NA	NA	NA	NA	NA	NA	NA	NA	NA	NA	NA	NA	NA	21.0358	NA	NA	31.1238	24.0851	NA	NA	NA
C3N-00249-T	Tumor	PDA	NA	18.1182	NA	NA	NA	NA	NA	NA	NA	NA	NA	NA	NA	NA	NA	17.12	NA	NA	NA	NA	NA	NA	NA	NA	NA	NA	NA	NA	NA	NA	NA	NA	NA	NA	NA	NA	NA	NA	NA	19.1164	NA	NA	32.2883	24.1749	NA	NA	NA
C3N-00293-N	Normal	LUAD	21.5428	15.7783	-2.44528	NA	NA	NA	NA	NA	NA	NA	NA	NA	NA	NA	NA	18.0052	NA	NA	NA	NA	NA	NA	NA	NA	NA	NA	NA	NA	NA	NA	NA	NA	NA	NA	NA	NA	NA	13.5514	NA	NA	NA	NA	32.0626	24.4067	NA	NA	NA
C3N-00293-T	Tumor	LUAD	21.7816	15.1431	-3.09459	NA	NA	NA	NA	NA	NA	NA	NA	NA	NA	NA	NA	16.858	NA	NA	NA	NA	NA	NA	NA	NA	NA	NA	NA	NA	NA	NA	NA	NA	NA	NA	NA	NA	NA	13.4281	NA	NA	NA	NA	31.8853	24.6671	NA	NA	NA
C3N-00294-T	Tumor	LUAD	23.2928	19.6528	1.32615	NA	NA	NA	NA	NA	NA	NA	NA	NA	NA	NA	NA	20.3722	NA	NA	NA	NA	19.8497	NA	NA	NA	NA	NA	NA	18.7366	NA	NA	NA	NA	NA	NA	NA	NA	NA	NA	NA	NA	NA	NA	31.428	26.1769	NA	NA	21.0369
C3N-00295-N	Normal	HNSCC	19.4508	18.8311	0.730721	NA	NA	NA	NA	NA	NA	NA	NA	NA	NA	NA	NA	16.0121	NA	NA	NA	NA	NA	NA	NA	NA	NA	NA	20.7838	17.9808	NA	NA	NA	18.7178	NA	NA	NA	NA	NA	NA	NA	20.6608	NA	NA	31.3443	25.7413	NA	NA	20.3556
C3N-00295-T	Tumor	HNSCC	19.3284	18.8854	0.792294	NA	NA	NA	NA	NA	NA	NA	NA	NA	NA	NA	NA	16.2036	NA	NA	NA	NA	NA	NA	NA	NA	NA	NA	21.028	18.3028	NA	NA	NA	19.0873	NA	NA	NA	NA	NA	NA	NA	19.8055	NA	NA	31.2375	25.797	NA	NA	19.8332
C3N-00297-T	Tumor	HNSCC	19.4805	19.1234	1.02126	NA	NA	NA	NA	NA	NA	NA	NA	NA	NA	NA	NA	17.3907	NA	NA	NA	NA	NA	NA	NA	NA	NA	NA	21.7209	18.0229	NA	NA	NA	18.9856	NA	NA	NA	NA	NA	NA	NA	19.4968	NA	NA	30.8389	25.523	NA	NA	20.7254
C3N-00299-T	Tumor	HNSCC	19.1523	18.9043	0.821495	NA	NA	NA	NA	NA	NA	NA	NA	NA	NA	NA	NA	16.655	NA	NA	NA	NA	18.564	NA	NA	NA	NA	NA	21.6186	NA	NA	NA	NA	18.7794	NA	NA	NA	NA	NA	NA	NA	NA	NA	NA	30.9739	25.6955	NA	NA	NA
C3N-00302-T	Tumor	PDA	NA	17.402	NA	NA	NA	NA	NA	NA	NA	NA	NA	NA	NA	NA	NA	17.4858	NA	NA	NA	NA	17.3182	NA	NA	NA	NA	NA	NA	NA	NA	NA	NA	NA	NA	NA	NA	NA	NA	NA	NA	NA	NA	NA	32.1725	25.9889	NA	NA	NA
C3N-00303-T	Tumor	PDA	18.9075	16.4885	-1.57981	NA	NA	NA	NA	NA	NA	NA	NA	NA	NA	NA	NA	16.4885	NA	NA	NA	NA	NA	NA	NA	NA	NA	NA	NA	NA	NA	NA	NA	NA	NA	NA	NA	NA	NA	NA	NA	NA	NA	NA	32.6442	24.5738	NA	NA	18.9799
C3N-00305-T	Tumor	CCRCC	20.6872	NA	NA	NA	NA	NA	NA	NA	NA	NA	NA	NA	NA	NA	NA	NA	NA	NA	NA	NA	NA	NA	NA	NA	NA	NA	NA	NA	NA	NA	NA	NA	NA	NA	NA	NA	NA	NA	NA	NA	NA	NA	31.9275	23.5655	NA	NA	22.5027
C3N-00306-N	Normal	HNSCC	19.0025	18.1656	0.0916623	NA	NA	NA	NA	NA	NA	NA	NA	NA	NA	NA	NA	16.3473	NA	NA	NA	NA	17.3753	NA	NA	NA	NA	NA	20.5093	NA	NA	NA	NA	18.4306	NA	NA	NA	NA	NA	NA	NA	NA	NA	NA	32.4153	25.0977	NA	NA	NA
C3N-00306-T	Tumor	HNSCC	19.1832	18.711	0.626407	NA	NA	NA	NA	NA	NA	NA	NA	NA	NA	NA	NA	16.1132	NA	NA	NA	NA	18.3628	NA	NA	NA	NA	NA	21.3615	NA	NA	NA	NA	19.0065	NA	NA	NA	NA	NA	NA	NA	NA	NA	NA	31.3659	25.7305	NA	NA	NA
C3N-00307-N	Normal	HNSCC	19.3458	18.0752	-0.0189371	NA	NA	NA	NA	NA	NA	NA	NA	NA	NA	NA	NA	16.0382	NA	NA	NA	NA	17.4244	NA	NA	NA	NA	NA	20.3717	NA	NA	NA	NA	18.4666	NA	NA	NA	NA	NA	NA	NA	NA	NA	NA	32.6691	25.2012	NA	NA	NA
C3N-00307-T	Tumor	HNSCC	19.1035	18.7255	0.645594	NA	NA	NA	NA	NA	NA	NA	NA	NA	NA	NA	NA	16.3336	NA	NA	NA	NA	18.0338	NA	NA	NA	NA	NA	21.4052	NA	NA	NA	NA	19.1295	NA	NA	NA	NA	NA	NA	NA	NA	NA	NA	31.669	25.6396	NA	NA	NA
C3N-00310-N	Normal	CCRCC	NA	NA	NA	NA	NA	NA	NA	NA	NA	NA	NA	NA	NA	NA	NA	NA	NA	NA	NA	NA	NA	NA	NA	NA	NA	NA	NA	NA	NA	NA	NA	NA	NA	NA	NA	NA	NA	NA	NA	NA	NA	NA	30.524	23.1131	NA	NA	20.691
C3N-00310-T	Tumor	CCRCC	NA	NA	NA	NA	NA	NA	NA	NA	NA	NA	NA	NA	NA	NA	NA	NA	NA	NA	NA	NA	NA	NA	NA	NA	NA	NA	NA	NA	NA	NA	NA	NA	NA	NA	NA	NA	NA	NA	NA	NA	NA	NA	31.7014	23.771	NA	NA	22.6629
C3N-00312-N	Normal	CCRCC	NA	NA	NA	NA	NA	NA	NA	NA	NA	NA	NA	NA	NA	NA	NA	NA	NA	NA	NA	NA	NA	NA	NA	NA	NA	NA	NA	NA	NA	NA	NA	NA	NA	NA	NA	NA	NA	NA	NA	NA	NA	NA	30.3468	22.9455	NA	NA	20.6811
C3N-00312-T	Tumor	CCRCC	NA	NA	NA	NA	NA	NA	NA	NA	NA	NA	NA	NA	NA	NA	NA	NA	NA	NA	NA	NA	NA	NA	NA	NA	NA	NA	NA	NA	NA	NA	NA	NA	NA	NA	NA	NA	NA	NA	NA	NA	NA	NA	31.3078	24.1563	NA	NA	22.7124
C3N-00313-T	Tumor	CCRCC	NA	NA	NA	NA	NA	NA	NA	NA	NA	NA	NA	NA	NA	NA	NA	NA	NA	NA	NA	NA	NA	NA	NA	NA	NA	NA	NA	NA	NA	NA	NA	NA	NA	NA	NA	NA	NA	NA	NA	NA	NA	NA	30.4393	23.3287	NA	NA	20.2916
C3N-00314-N	Normal	CCRCC	17.4817	NA	NA	NA	NA	NA	NA	NA	NA	NA	NA	NA	NA	NA	NA	NA	NA	NA	NA	NA	NA	NA	NA	NA	NA	NA	NA	NA	NA	NA	NA	NA	NA	NA	NA	NA	NA	NA	NA	NA	NA	NA	30.3799	22.8744	NA	NA	21.1751
C3N-00314-T	Tumor	CCRCC	17.4178	NA	NA	NA	NA	NA	NA	NA	NA	NA	NA	NA	NA	NA	NA	NA	NA	NA	NA	NA	NA	NA	NA	NA	NA	NA	NA	NA	NA	NA	NA	NA	NA	NA	NA	NA	NA	NA	NA	NA	NA	NA	31.848	23.7144	NA	NA	22.4804
C3N-00315-T	Tumor	CCRCC	15.2635	NA	NA	NA	NA	NA	NA	NA	NA	NA	NA	NA	NA	NA	NA	NA	NA	NA	NA	NA	NA	NA	NA	NA	NA	NA	NA	NA	NA	NA	NA	NA	NA	NA	NA	NA	NA	NA	NA	NA	NA	NA	31.014	25.0173	NA	NA	21.4764
C3N-00317-N	Normal	CCRCC	17.4054	NA	NA	NA	NA	NA	NA	NA	NA	NA	NA	NA	NA	NA	NA	NA	NA	NA	NA	NA	NA	NA	NA	NA	NA	NA	NA	NA	NA	NA	NA	NA	NA	NA	NA	NA	NA	NA	NA	NA	NA	NA	30.5229	23.0471	NA	NA	20.7439
C3N-00317-T	Tumor	CCRCC	16.9726	NA	NA	NA	NA	NA	NA	NA	NA	NA	NA	NA	NA	NA	NA	NA	NA	NA	NA	NA	NA	NA	NA	NA	NA	NA	NA	NA	NA	NA	NA	NA	NA	NA	NA	NA	NA	NA	NA	NA	NA	NA	31.8048	24.2261	NA	NA	22.2358
C3N-00320-N	Normal	CCRCC	17.79	NA	NA	NA	NA	NA	NA	NA	NA	NA	NA	NA	NA	NA	NA	NA	NA	NA	NA	NA	NA	NA	NA	NA	NA	NA	NA	NA	NA	NA	NA	NA	NA	NA	NA	NA	NA	NA	NA	NA	NA	NA	30.494	23.1175	NA	NA	20.2463
C3N-00320-T	Tumor	CCRCC	17.0681	NA	NA	NA	NA	NA	NA	NA	NA	NA	NA	NA	NA	NA	NA	NA	NA	NA	NA	NA	NA	NA	NA	NA	NA	NA	NA	NA	NA	NA	NA	NA	NA	NA	NA	NA	NA	NA	NA	NA	NA	NA	31.7892	24.5056	NA	NA	22.4885
C3N-00321-T	Tumor	UCEC	19.6418	19.7537	1.64209	NA	NA	17.9827	NA	22.55	NA	NA	NA	NA	18.1568	NA	NA	NA	NA	NA	NA	NA	NA	NA	NA	NA	NA	NA	20.4192	21.6993	NA	NA	NA	18.9759	NA	NA	NA	NA	NA	18.4919	NA	NA	NA	NA	31.5481	27.0097	NA	20.886	21.8723
C3N-00322-T	Tumor	UCEC	19.468	19.7868	1.68547	NA	NA	17.5865	NA	21.9635	NA	NA	NA	NA	NA	NA	NA	NA	NA	18.7142	NA	NA	19.4381	NA	NA	NA	NA	NA	NA	21.232	NA	NA	NA	NA	NA	NA	NA	NA	NA	NA	NA	NA	NA	NA	32.2132	25.546	NA	20.3543	NA
C3N-00323-T	Tumor	UCEC	NA	18.7331	NA	NA	NA	18.0512	NA	21.9711	NA	NA	NA	NA	NA	NA	NA	NA	NA	18.3708	NA	NA	19.7118	NA	NA	NA	16.244	NA	21.67	19.7069	16.1025	NA	NA	18.3241	NA	NA	NA	NA	17.1785	NA	NA	NA	NA	NA	31.9317	26.0379	NA	21.3306	NA
C3N-00324-T	Tumor	UCEC	NA	18.8094	NA	NA	NA	NA	NA	21.7034	NA	NA	16.2729	NA	18.5775	NA	NA	NA	NA	18.7078	NA	NA	NA	NA	16.2244	NA	NA	NA	21.1784	20.1282	NA	NA	NA	18.3526	NA	NA	NA	NA	NA	NA	18.1391	NA	NA	NA	31.6895	25.6775	NA	21.1026	NA
C3N-00326-T	Tumor	UCEC	NA	18.9786	NA	NA	NA	NA	NA	21.6876	NA	NA	NA	NA	NA	NA	NA	NA	NA	19.3263	NA	NA	NA	NA	NA	NA	NA	NA	21.1714	20.6995	16.1926	NA	NA	NA	NA	NA	NA	NA	17.5156	16.2572	NA	NA	NA	NA	31.8343	25.6477	NA	21.1956	NA
C3N-00328-T	Tumor	UCEC	20.9863	19.472	1.28118	NA	NA	NA	NA	22.3503	NA	NA	NA	NA	NA	NA	NA	18.8334	15.375	19.5781	NA	NA	20.8138	NA	NA	NA	NA	NA	20.727	20.9024	NA	NA	NA	19.5569	NA	NA	NA	NA	18.2768	NA	18.3061	NA	NA	NA	31.9269	26.1222	NA	20.6179	20.5488
C3N-00333-N	Normal	UCEC	NA	18.3193	NA	NA	NA	NA	NA	21.6178	NA	NA	NA	16.7466	NA	NA	NA	NA	NA	18.7552	NA	NA	NA	NA	NA	NA	NA	NA	17.8147	16.6623	NA	NA	NA	NA	NA	NA	NA	NA	NA	NA	NA	NA	NA	NA	33.0327	24.8982	NA	20.5102	20.5486
C3N-00333-T	Tumor	UCEC	NA	18.596	NA	NA	NA	NA	NA	21.3549	NA	NA	NA	16.813	NA	NA	NA	NA	NA	19.0789	NA	NA	NA	NA	NA	NA	NA	NA	18.0728	17.6602	NA	NA	NA	NA	NA	NA	NA	NA	NA	NA	NA	NA	NA	NA	32.0765	25.4088	NA	20.6652	21.1219
C3N-00334-T	Tumor	UCEC	19.5586	17.4488	-0.657929	NA	13.9363	17.987	NA	21.8331	NA	NA	NA	17.3112	18.4093	NA	NA	18.5156	15.1908	18.6267	NA	NA	NA	NA	NA	NA	NA	13.7272	19.9187	20.0458	NA	16.8417	NA	13.6303	NA	NA	NA	NA	NA	NA	18.3093	NA	NA	NA	32.0456	25.9024	NA	20.6354	20.7267
C3N-00335-T	Tumor	UCEC	NA	20.0407	NA	NA	NA	NA	NA	23.1649	NA	NA	NA	NA	NA	NA	NA	NA	NA	19.9488	NA	NA	NA	NA	NA	NA	NA	NA	22.3128	21.7253	16.7826	NA	NA	NA	NA	NA	NA	NA	18.2529	18.0978	NA	NA	NA	NA	31.9345	26.2801	NA	21.5724	NA
C3N-00337-T	Tumor	UCEC	19.2124	20.4415	2.35517	NA	NA	18.0252	NA	22.2927	NA	NA	NA	NA	NA	NA	NA	NA	NA	19.1978	NA	NA	21.3672	NA	NA	NA	NA	NA	NA	21.3246	NA	NA	NA	NA	NA	NA	NA	NA	NA	NA	NA	NA	NA	NA	32.5332	25.6534	NA	20.4679	NA
C3N-00339-T	Tumor	UCEC	NA	18.0911	NA	NA	NA	NA	NA	NA	NA	NA	15.7405	16.7507	17.6274	NA	NA	18.3658	NA	NA	NA	NA	19.8451	NA	NA	NA	NA	NA	20.9465	20.8356	16.0365	17.1636	NA	18.6918	NA	NA	NA	NA	17.7467	17.3431	NA	NA	NA	NA	31.6391	26.1614	NA	22.052	20.6241
C3N-00340-T	Tumor	UCEC	19.1356	19.3093	1.22746	NA	NA	17.5649	NA	22.0694	NA	NA	NA	NA	18.2275	NA	NA	NA	NA	NA	NA	NA	NA	NA	NA	NA	NA	NA	20.3565	21.5931	NA	NA	NA	19.3139	NA	NA	NA	NA	NA	16.0397	NA	NA	NA	NA	31.6984	26.6105	NA	21.4227	20.7248
C3N-00377-T	Tumor	UCEC	21.2034	17.8602	-0.343427	NA	14.0921	18.6703	NA	22.0764	NA	NA	NA	16.748	18.0509	NA	NA	17.8961	15.149	18.9383	NA	NA	NA	NA	NA	NA	NA	NA	20.1588	20.3407	NA	17.4028	NA	14.6739	NA	NA	NA	NA	NA	NA	17.9848	NA	NA	NA	30.8858	26.3644	NA	20.6595	21.497
C3N-00379-T	Tumor	UCEC	19.2622	19.1958	1.10658	NA	NA	18.0642	NA	21.9589	NA	NA	NA	NA	17.866	NA	NA	NA	NA	18.7033	NA	NA	19.2071	NA	NA	NA	NA	NA	21.0425	NA	NA	NA	NA	NA	NA	NA	NA	NA	NA	NA	17.5289	NA	NA	NA	32.47	26.0749	NA	20.7095	19.7012
C3N-00380-T	Tumor	CCRCC	NA	NA	NA	NA	NA	NA	NA	NA	NA	NA	NA	NA	NA	NA	NA	NA	NA	NA	NA	NA	NA	NA	NA	NA	NA	NA	NA	NA	NA	NA	NA	NA	NA	NA	NA	NA	NA	NA	NA	NA	NA	NA	31.7784	24.3739	NA	NA	21.9343
C3N-00383-N	Normal	UCEC	18.168	18.988	0.963169	NA	NA	18.0119	NA	20.8639	NA	NA	NA	NA	NA	NA	NA	NA	NA	NA	NA	NA	18.4751	NA	NA	NA	NA	NA	NA	20.8983	NA	NA	NA	NA	NA	NA	NA	NA	NA	NA	16.6906	NA	NA	NA	32.9524	25.0805	NA	NA	NA
C3N-00383-T	Tumor	UCEC	18.518	19.4751	1.42966	NA	NA	17.7762	NA	21.4581	NA	NA	NA	NA	NA	NA	NA	NA	NA	NA	NA	NA	19.6579	NA	NA	NA	NA	NA	NA	20.9836	NA	NA	NA	NA	NA	NA	NA	NA	NA	NA	17.4996	NA	NA	NA	31.9173	25.43	NA	NA	NA
C3N-00386-T	Tumor	UCEC	18.3696	18.8358	0.799122	NA	NA	17.7519	NA	21.1165	NA	NA	NA	NA	17.5041	NA	NA	NA	NA	18.0499	NA	NA	19.2727	NA	NA	NA	NA	NA	21.3614	NA	NA	NA	NA	NA	NA	NA	NA	NA	NA	NA	16.7939	NA	NA	NA	32.5844	25.0479	NA	20.3279	20.2672
C3N-00388-T	Tumor	UCEC	NA	18.3602	NA	NA	NA	17.8717	NA	22.134	NA	NA	16.6911	NA	19.0208	NA	NA	NA	NA	19.5902	13.6147	NA	NA	NA	NA	NA	NA	NA	21.6491	20.4528	NA	NA	NA	19.1041	NA	NA	NA	13.7484	18.0849	NA	NA	NA	NA	NA	31.3405	26.7759	NA	21.4468	23.0622
C3N-00389-T	Tumor	UCEC	19.6092	18.4484	0.338697	NA	NA	17.8857	NA	22.1453	NA	NA	NA	NA	18.6532	NA	NA	18.3551	NA	18.5672	NA	NA	NA	NA	NA	NA	16.1397	NA	19.8387	21.3506	NA	NA	NA	NA	NA	NA	NA	NA	NA	NA	17.8832	NA	NA	13.6651	31.2211	25.6884	NA	21.1585	20.0521
C3N-00390-N	Normal	CCRCC	NA	NA	NA	NA	NA	NA	NA	NA	NA	NA	NA	NA	NA	NA	NA	NA	NA	NA	NA	NA	NA	NA	NA	NA	NA	NA	NA	NA	NA	NA	NA	NA	NA	NA	NA	NA	NA	NA	NA	NA	NA	NA	30.4871	23.2894	NA	NA	20.551
C3N-00390-T	Tumor	CCRCC	NA	NA	NA	NA	NA	NA	NA	NA	NA	NA	NA	NA	NA	NA	NA	NA	NA	NA	NA	NA	NA	NA	NA	NA	NA	NA	NA	NA	NA	NA	NA	NA	NA	NA	NA	NA	NA	NA	NA	NA	NA	NA	32.116	24.0686	NA	NA	22.83
C3N-00433-N	Normal	LUAD	21.7911	14.6945	-3.54372	NA	NA	NA	NA	NA	NA	NA	NA	NA	NA	NA	NA	16.3093	NA	NA	NA	NA	NA	NA	NA	NA	NA	NA	NA	NA	NA	NA	NA	NA	NA	NA	NA	NA	NA	13.0797	NA	NA	NA	NA	32.1238	24.1105	NA	NA	NA
C3N-00433-T	Tumor	LUAD	21.7146	17.4163	-0.817392	NA	NA	NA	NA	NA	NA	NA	NA	NA	NA	NA	NA	21.0457	NA	NA	NA	NA	NA	NA	NA	NA	NA	NA	NA	NA	NA	NA	NA	NA	NA	NA	NA	NA	NA	13.7869	NA	NA	NA	NA	32.1334	25.5015	NA	NA	NA
C3N-00435-N	Normal	CCRCC	18.0266	NA	NA	NA	NA	NA	NA	NA	NA	NA	NA	NA	NA	NA	NA	NA	NA	NA	NA	NA	NA	NA	NA	NA	NA	NA	NA	NA	NA	NA	NA	NA	NA	NA	NA	NA	NA	NA	NA	NA	NA	NA	30.5848	23.1966	NA	NA	20.7386
C3N-00435-T	Tumor	CCRCC	18.1764	NA	NA	NA	NA	NA	NA	NA	NA	NA	NA	NA	NA	NA	NA	NA	NA	NA	NA	NA	NA	NA	NA	NA	NA	NA	NA	NA	NA	NA	NA	NA	NA	NA	NA	NA	NA	NA	NA	NA	NA	NA	31.5231	24.494	NA	NA	20.31
C3N-00436-N	Normal	PDA	18.9278	18.6829	0.613335	NA	NA	NA	NA	18.6829	NA	NA	NA	NA	NA	NA	NA	NA	NA	NA	NA	NA	NA	NA	NA	NA	NA	NA	NA	NA	NA	NA	NA	NA	NA	NA	NA	NA	NA	NA	NA	NA	NA	NA	31.0562	24.2462	NA	NA	NA
C3N-00436-T	Tumor	PDA	17.5344	18.8071	0.819627	NA	NA	NA	NA	18.8071	NA	NA	NA	NA	NA	NA	NA	NA	NA	NA	NA	NA	NA	NA	NA	NA	NA	NA	NA	NA	NA	NA	NA	NA	NA	NA	NA	NA	NA	NA	NA	NA	NA	NA	32.2465	24.04	NA	NA	NA
C3N-00437-N	Normal	CCRCC	16.9867	NA	NA	NA	NA	NA	NA	NA	NA	NA	NA	NA	NA	NA	NA	NA	NA	NA	NA	NA	NA	NA	NA	NA	NA	NA	NA	NA	NA	NA	NA	NA	NA	NA	NA	NA	NA	NA	NA	NA	NA	NA	30.3365	23.3771	NA	NA	20.5984
C3N-00437-T	Tumor	CCRCC	16.6183	NA	NA	NA	NA	NA	NA	NA	NA	NA	NA	NA	NA	NA	NA	NA	NA	NA	NA	NA	NA	NA	NA	NA	NA	NA	NA	NA	NA	NA	NA	NA	NA	NA	NA	NA	NA	NA	NA	NA	NA	NA	31.9871	24.2775	NA	NA	22.4044
C3N-00491-N	Normal	CCRCC	17.1498	NA	NA	NA	NA	NA	NA	NA	NA	NA	NA	NA	NA	NA	NA	NA	NA	NA	NA	NA	NA	NA	NA	NA	NA	NA	NA	NA	NA	NA	NA	NA	NA	NA	NA	NA	NA	NA	NA	NA	NA	NA	30.5847	23.112	NA	NA	20.4007
C3N-00491-T	Tumor	CCRCC	18.3007	NA	NA	NA	NA	NA	NA	NA	NA	NA	NA	NA	NA	NA	NA	NA	NA	NA	NA	NA	NA	NA	NA	NA	NA	NA	NA	NA	NA	NA	NA	NA	NA	NA	NA	NA	NA	NA	NA	NA	NA	NA	31.3161	24.7986	NA	NA	22.1899
C3N-00492-N	Normal	CCRCC	17.1648	NA	NA	NA	NA	NA	NA	NA	NA	NA	NA	NA	NA	NA	NA	NA	NA	NA	NA	NA	NA	NA	NA	NA	NA	NA	NA	NA	NA	NA	NA	NA	NA	NA	NA	NA	NA	NA	NA	NA	NA	NA	30.0448	23.1153	NA	NA	20.7427
C3N-00492-T	Tumor	CCRCC	16.2311	NA	NA	NA	NA	NA	NA	NA	NA	NA	NA	NA	NA	NA	NA	NA	NA	NA	NA	NA	NA	NA	NA	NA	NA	NA	NA	NA	NA	NA	NA	NA	NA	NA	NA	NA	NA	NA	NA	NA	NA	NA	30.054	23.8395	NA	NA	21.571
C3N-00494-N	Normal	CCRCC	NA	NA	NA	NA	NA	NA	NA	NA	NA	NA	NA	NA	NA	NA	NA	NA	NA	NA	NA	NA	NA	NA	NA	NA	NA	NA	NA	NA	NA	NA	NA	NA	NA	NA	NA	NA	NA	NA	NA	NA	NA	NA	30.7533	23.1059	NA	NA	20.6628
C3N-00494-T	Tumor	CCRCC	NA	NA	NA	NA	NA	NA	NA	NA	NA	NA	NA	NA	NA	NA	NA	NA	NA	NA	NA	NA	NA	NA	NA	NA	NA	NA	NA	NA	NA	NA	NA	NA	NA	NA	NA	NA	NA	NA	NA	NA	NA	NA	31.2222	24.0553	NA	NA	22.1597
C3N-00495-N	Normal	CCRCC	NA	NA	NA	NA	NA	NA	NA	NA	NA	NA	NA	NA	NA	NA	NA	NA	NA	NA	NA	NA	NA	NA	NA	NA	NA	NA	NA	NA	NA	NA	NA	NA	NA	NA	NA	NA	NA	NA	NA	NA	NA	NA	30.7558	23.1118	NA	NA	20.5424
C3N-00495-T	Tumor	CCRCC	NA	NA	NA	NA	NA	NA	NA	NA	NA	NA	NA	NA	NA	NA	NA	NA	NA	NA	NA	NA	NA	NA	NA	NA	NA	NA	NA	NA	NA	NA	NA	NA	NA	NA	NA	NA	NA	NA	NA	NA	NA	NA	31.6237	23.9113	NA	NA	22.6466
C3N-00497-N	Normal	LSCC	20.5331	18.1228	-0.0412935	NA	17.1398	NA	NA	NA	NA	NA	NA	NA	NA	NA	NA	NA	NA	NA	NA	NA	NA	NA	NA	NA	NA	NA	19.1178	18.7342	NA	NA	NA	NA	NA	NA	NA	NA	17.4994	NA	NA	NA	NA	NA	32.0348	25.0983	NA	18.5942	20.7796
C3N-00497-T	Tumor	LSCC	21.521	19.3389	1.11666	NA	17.8047	NA	NA	NA	NA	NA	NA	NA	NA	NA	NA	NA	NA	NA	NA	NA	NA	NA	NA	NA	NA	NA	20.8608	20.1363	NA	NA	NA	NA	NA	NA	NA	NA	18.554	NA	NA	NA	NA	NA	31.3662	26.6163	NA	18.6289	20.7669
C3N-00498-N	Normal	HNSCC	17.8614	18.9778	0.971044	NA	NA	NA	NA	NA	NA	NA	NA	NA	NA	NA	NA	NA	NA	NA	NA	NA	17.1705	NA	NA	NA	NA	NA	21.1216	NA	NA	NA	NA	18.6412	NA	NA	NA	NA	NA	NA	NA	NA	NA	NA	32.0881	25.0145	NA	NA	NA
C3N-00498-T	Tumor	HNSCC	20.1646	19.9344	1.79195	NA	NA	NA	NA	NA	NA	NA	NA	NA	NA	NA	NA	17.7991	NA	NA	NA	NA	19.726	NA	NA	NA	NA	NA	22.4595	NA	NA	NA	NA	19.7528	NA	NA	NA	NA	NA	NA	NA	NA	NA	NA	31.1155	26.2046	NA	NA	NA
C3N-00511-T	Tumor	PDA	NA	17.548	NA	16.2245	NA	NA	NA	18.6057	NA	NA	NA	NA	NA	NA	NA	18.0846	NA	NA	NA	NA	17.2774	NA	NA	NA	NA	NA	NA	NA	NA	NA	NA	NA	NA	NA	NA	NA	NA	NA	NA	NA	NA	NA	31.5806	24.0573	NA	NA	NA
C3N-00512-N	Normal	PDA	NA	16.6523	NA	14.8218	NA	NA	NA	18.5736	NA	NA	NA	NA	NA	NA	NA	NA	NA	NA	NA	NA	16.5616	NA	NA	NA	NA	NA	NA	NA	NA	NA	NA	NA	NA	NA	NA	NA	NA	NA	NA	NA	NA	NA	30.9558	23.7416	NA	NA	NA
C3N-00512-T	Tumor	PDA	NA	17.2546	NA	15.6446	NA	NA	NA	18.6647	NA	NA	NA	NA	NA	NA	NA	17.8426	NA	NA	NA	NA	16.8666	NA	NA	NA	NA	NA	NA	NA	NA	NA	NA	NA	NA	NA	NA	NA	NA	NA	NA	NA	NA	NA	31.7384	24.213	NA	NA	NA
C3N-00513-N	Normal	PDA	NA	17.4993	NA	NA	NA	NA	NA	NA	NA	NA	NA	NA	NA	NA	NA	16.6844	NA	NA	NA	NA	NA	NA	NA	NA	NA	NA	18.3142	NA	NA	NA	NA	NA	NA	NA	NA	NA	NA	NA	NA	NA	NA	NA	30.4195	23.4979	NA	NA	18.7839
C3N-00513-T	Tumor	PDA	NA	18.3162	NA	NA	NA	NA	NA	NA	NA	NA	NA	NA	NA	NA	NA	18.1173	NA	NA	NA	NA	NA	NA	NA	NA	NA	NA	18.5152	NA	NA	NA	NA	NA	NA	NA	NA	NA	NA	NA	NA	NA	NA	NA	30.8092	23.949	NA	NA	18.2084
C3N-00514-N	Normal	PDA	NA	17.5043	NA	NA	NA	NA	NA	18.5485	NA	NA	NA	NA	NA	NA	NA	17.5446	NA	NA	NA	NA	16.4199	NA	NA	NA	NA	NA	NA	NA	NA	NA	NA	NA	NA	NA	NA	NA	NA	NA	NA	NA	NA	NA	31.0344	23.5553	NA	NA	NA
C3N-00514-T	Tumor	PDA	NA	17.9008	NA	NA	NA	NA	NA	18.4934	NA	NA	NA	NA	NA	NA	NA	18.3646	NA	NA	NA	NA	16.8444	NA	NA	NA	NA	NA	NA	NA	NA	NA	NA	NA	NA	NA	NA	NA	NA	NA	NA	NA	NA	NA	32.3724	24.4439	NA	NA	NA
C3N-00516-T	Tumor	PDA	18.7533	18.7915	0.732235	NA	NA	NA	NA	18.7915	NA	NA	NA	NA	NA	NA	NA	NA	NA	NA	NA	NA	NA	NA	NA	NA	NA	NA	NA	NA	NA	NA	NA	NA	NA	NA	NA	NA	NA	NA	NA	NA	NA	NA	32.4052	24.8286	NA	NA	NA
C3N-00517-N	Normal	PDA	18.351	16.7742	-1.2614	NA	NA	NA	NA	NA	NA	NA	NA	NA	NA	NA	NA	17.5545	NA	NA	NA	NA	NA	NA	NA	NA	NA	NA	18.1756	NA	NA	NA	NA	14.5925	NA	NA	NA	NA	NA	NA	NA	NA	NA	NA	30.6214	24.3302	NA	NA	17.3115
C3N-00517-T	Tumor	PDA	20.6722	16.3647	-1.80757	NA	NA	NA	NA	NA	NA	NA	NA	NA	NA	NA	NA	17.2719	NA	NA	NA	NA	NA	NA	NA	NA	NA	NA	18.3728	15.0361	NA	NA	NA	14.7782	NA	NA	NA	NA	NA	NA	NA	NA	NA	NA	30.6177	24.2747	NA	NA	17.4814
C3N-00518-N	Normal	PDA	NA	18.1016	NA	NA	NA	NA	NA	18.135	NA	NA	NA	NA	NA	NA	NA	17.134	NA	NA	NA	NA	NA	NA	NA	NA	NA	NA	19.0358	NA	NA	NA	NA	NA	NA	NA	NA	NA	NA	NA	NA	NA	NA	NA	32.7123	23.6683	NA	NA	NA
C3N-00518-T	Tumor	PDA	NA	18.0331	NA	NA	NA	NA	NA	18.2138	NA	NA	NA	NA	NA	NA	NA	17.1772	NA	NA	NA	NA	NA	NA	NA	NA	NA	NA	18.7082	NA	NA	NA	NA	NA	NA	NA	NA	NA	NA	NA	NA	NA	NA	NA	33.1592	23.6333	NA	NA	NA
C3N-00519-N	Normal	HNSCC	18.6243	18.8495	0.797803	NA	NA	NA	NA	NA	NA	NA	NA	NA	NA	NA	NA	15.6974	NA	NA	NA	NA	NA	NA	NA	NA	NA	NA	21.0453	18.0383	NA	NA	NA	18.5239	NA	NA	NA	NA	NA	NA	NA	20.9425	NA	NA	32.288	25.0693	NA	NA	19.1312
C3N-00519-T	Tumor	HNSCC	19.4662	18.9514	0.850146	NA	NA	NA	NA	NA	NA	NA	NA	NA	NA	NA	NA	17.2661	NA	NA	NA	NA	NA	NA	NA	NA	NA	NA	21.1207	18.0804	NA	NA	NA	18.7422	NA	NA	NA	NA	NA	NA	NA	19.5476	NA	NA	31.6753	25.5845	NA	NA	19.4293
C3N-00545-N	Normal	LUAD	21.6371	18.0805	-0.148613	NA	NA	NA	NA	NA	NA	NA	NA	NA	NA	NA	NA	NA	NA	NA	NA	NA	NA	NA	NA	NA	17.7276	NA	18.4335	NA	NA	NA	NA	NA	NA	NA	NA	NA	NA	NA	NA	NA	NA	NA	31.9025	24.8172	NA	16.6266	20.5576
C3N-00545-T	Tumor	LUAD	22.1501	18.3591	0.0997395	NA	NA	NA	NA	NA	NA	NA	NA	NA	NA	NA	NA	NA	NA	NA	NA	NA	18.057	NA	NA	NA	17.6765	NA	19.3438	NA	NA	NA	NA	NA	NA	NA	NA	NA	NA	NA	NA	NA	NA	NA	32.3158	24.734	NA	16.7295	20.103
C3N-00546-N	Normal	LUAD	22.8441	16.1792	-2.12099	NA	NA	NA	NA	NA	NA	NA	NA	NA	NA	NA	NA	16.3224	NA	NA	NA	NA	16.9098	NA	NA	NA	NA	NA	18.3517	NA	NA	NA	NA	NA	NA	NA	NA	NA	NA	13.133	NA	NA	NA	NA	32.4767	24.3448	NA	NA	20.1061
C3N-00546-T	Tumor	LUAD	20.8186	17.7258	-0.455078	NA	NA	NA	NA	NA	NA	NA	NA	NA	NA	NA	NA	18.9381	NA	NA	NA	NA	18.73	NA	NA	NA	NA	NA	19.9116	NA	NA	NA	NA	NA	NA	NA	NA	NA	NA	13.3237	NA	NA	NA	NA	31.7786	25.4854	NA	NA	19.909
C3N-00547-N	Normal	LUAD	22.0785	16.156	-2.09912	15.8549	NA	NA	NA	NA	NA	NA	NA	NA	NA	NA	NA	NA	NA	NA	NA	NA	NA	NA	NA	NA	NA	NA	19.0704	16.159	NA	NA	NA	NA	NA	NA	NA	NA	NA	NA	NA	NA	NA	13.5397	32.2327	24.629	NA	NA	19.7479
C3N-00547-T	Tumor	LUAD	22.7103	17.51	-0.7823	17.6566	NA	NA	NA	NA	NA	NA	NA	NA	NA	NA	NA	NA	NA	NA	NA	NA	NA	NA	NA	NA	NA	NA	19.6442	17.7356	NA	NA	NA	NA	NA	NA	NA	NA	NA	NA	NA	NA	NA	15.0037	31.1442	25.5365	NA	NA	20.3705
C3N-00549-N	Normal	LUAD	21.251	16.93	-1.27639	NA	NA	16.0237	NA	NA	NA	NA	NA	NA	NA	NA	NA	16.2721	NA	NA	NA	NA	17.3578	NA	NA	NA	18.1043	NA	17.8772	15.9449	NA	NA	NA	NA	NA	NA	NA	NA	NA	NA	NA	NA	NA	NA	32.2071	24.4773	NA	NA	NA
C3N-00549-T	Tumor	LUAD	22.1243	19.3111	1.05322	NA	NA	16.759	NA	NA	NA	NA	NA	NA	NA	NA	NA	20.7951	NA	NA	NA	NA	20.2503	NA	NA	NA	19.1364	NA	20.2441	18.6813	NA	NA	NA	NA	NA	NA	NA	NA	NA	NA	NA	NA	NA	NA	31.2575	25.521	NA	NA	NA
C3N-00550-N	Normal	LUAD	NA	16.4855	NA	NA	NA	NA	NA	NA	NA	NA	NA	NA	NA	NA	NA	NA	NA	14.9202	NA	NA	17.2153	NA	NA	NA	17.9462	NA	18.4812	17.6287	NA	NA	NA	NA	NA	NA	NA	NA	NA	NA	NA	NA	NA	12.7211	31.8703	24.4802	NA	NA	19.5611
C3N-00550-T	Tumor	LUAD	NA	17.742	NA	NA	NA	NA	NA	NA	NA	NA	NA	NA	NA	NA	NA	18.8322	NA	17.0144	NA	NA	18.5521	NA	NA	NA	17.8406	NA	19.552	18.4584	NA	NA	NA	NA	NA	NA	NA	NA	NA	NA	NA	NA	NA	13.9442	31.3929	25.3943	NA	NA	19.7837
C3N-00551-N	Normal	LUAD	21.2087	15.2174	-2.98654	NA	NA	NA	NA	NA	NA	NA	NA	NA	NA	NA	NA	16.2215	NA	NA	NA	NA	17.6895	NA	NA	NA	NA	NA	NA	NA	NA	NA	NA	NA	NA	NA	NA	NA	11.741	NA	NA	NA	NA	NA	32.2808	24.5995	NA	NA	19.754
C3N-00551-T	Tumor	LUAD	22.9999	16.9645	-1.34486	NA	NA	NA	NA	NA	NA	NA	NA	NA	NA	NA	NA	19.476	NA	NA	NA	NA	18.6817	NA	NA	NA	NA	NA	NA	NA	NA	NA	NA	NA	NA	NA	NA	NA	12.7359	NA	NA	NA	NA	NA	31.2981	25.8366	NA	NA	20.4012
C3N-00552-N	Normal	LUAD	20.8383	17.1563	-1.02582	NA	NA	NA	NA	NA	NA	NA	NA	NA	NA	NA	NA	15.4429	NA	NA	NA	NA	17.3187	NA	NA	NA	NA	NA	18.7072	NA	NA	NA	NA	NA	NA	NA	NA	NA	NA	NA	NA	NA	NA	NA	32.1092	24.6259	NA	NA	19.8669
C3N-00552-T	Tumor	LUAD	22.6006	19.5372	1.25137	NA	NA	NA	NA	NA	NA	NA	NA	NA	NA	NA	NA	19.349	NA	NA	NA	NA	19.203	NA	NA	NA	NA	NA	20.0597	NA	NA	NA	NA	NA	NA	NA	NA	NA	NA	NA	NA	NA	NA	NA	31.7775	25.7476	NA	NA	20.2056
C3N-00555-N	Normal	LSCC	21.077	18.0075	-0.188682	NA	16.7226	NA	NA	19.5267	NA	NA	NA	NA	NA	NA	NA	18.3139	NA	NA	NA	NA	17.501	NA	NA	NA	18.9114	NA	18.8184	17.9022	NA	NA	NA	17.2726	NA	NA	NA	NA	17.0982	NA	NA	NA	NA	NA	32.0655	25.4226	NA	18.351	20.0489
C3N-00555-T	Tumor	LSCC	21.5086	19.3074	1.08579	NA	18.5082	NA	NA	21.0902	NA	NA	NA	NA	NA	NA	NA	20.7908	NA	NA	NA	NA	19.4578	NA	NA	NA	18.8694	NA	20.3851	19.64	NA	NA	NA	17.5332	NA	NA	NA	NA	17.4916	NA	NA	NA	NA	NA	30.7906	27.051	NA	19.5423	19.4364
C3N-00556-N	Normal	LUAD	22.0792	17.4508	-0.804418	NA	NA	NA	NA	NA	NA	NA	NA	NA	NA	NA	NA	NA	NA	NA	NA	NA	17.6722	NA	NA	NA	NA	NA	NA	17.2293	NA	NA	NA	NA	NA	NA	NA	NA	NA	NA	NA	NA	NA	NA	32.1317	24.6854	NA	NA	20.4677
C3N-00556-T	Tumor	LUAD	22.5131	19.0684	0.787672	NA	NA	NA	NA	NA	NA	NA	NA	NA	NA	NA	NA	19.1933	NA	NA	NA	NA	19.782	NA	NA	NA	NA	NA	NA	18.2299	NA	NA	NA	NA	NA	NA	NA	NA	NA	NA	NA	NA	NA	NA	32.0678	25.7584	NA	NA	20.2964
C3N-00559-N	Normal	LUAD	23.0348	17.8931	-0.418344	NA	NA	NA	NA	NA	NA	NA	NA	NA	NA	NA	NA	NA	NA	NA	NA	NA	17.3773	NA	NA	NA	17.6655	NA	18.6365	NA	NA	NA	NA	NA	NA	NA	NA	NA	NA	NA	NA	NA	NA	NA	32.738	24.3931	NA	16.8752	20.1779
C3N-00559-T	Tumor	LUAD	21.8214	18.9571	0.71716	NA	NA	NA	NA	NA	NA	NA	NA	NA	NA	NA	NA	NA	NA	NA	NA	NA	18.8833	NA	NA	NA	18.4329	NA	19.5553	NA	NA	NA	NA	NA	NA	NA	NA	NA	NA	NA	NA	NA	NA	NA	31.8299	25.4694	NA	17.5849	20.0389
C3N-00560-N	Normal	LUAD	21.5616	16.6214	-1.60326	15.2936	NA	NA	NA	NA	NA	NA	NA	NA	NA	NA	NA	NA	NA	NA	NA	NA	NA	NA	NA	NA	NA	NA	18.9683	15.6023	NA	NA	NA	NA	NA	NA	NA	NA	NA	NA	NA	NA	NA	NA	32.3365	24.4754	NA	17.0114	NA
C3N-00560-T	Tumor	LUAD	23.4496	19.1615	0.825624	17.943	NA	NA	NA	NA	NA	NA	NA	NA	NA	NA	NA	NA	NA	NA	NA	NA	NA	NA	NA	NA	NA	NA	20.8109	18.7307	NA	NA	NA	NA	NA	NA	NA	NA	NA	NA	NA	NA	NA	NA	31.2164	26.4063	NA	17.5045	NA
C3N-00572-N	Normal	LUAD	22.5375	16.6718	-1.61032	NA	NA	NA	NA	NA	NA	NA	NA	NA	NA	NA	NA	16.0915	NA	NA	NA	NA	16.6374	NA	NA	NA	17.2866	NA	NA	NA	NA	NA	NA	NA	NA	NA	NA	NA	NA	NA	NA	NA	NA	NA	31.9968	24.4233	NA	NA	20.0334
C3N-00572-T	Tumor	LUAD	22.2812	18.5722	0.305132	NA	NA	NA	NA	NA	NA	NA	NA	NA	NA	NA	NA	18.9929	NA	NA	NA	NA	18.939	NA	NA	NA	17.7847	NA	NA	NA	NA	NA	NA	NA	NA	NA	NA	NA	NA	NA	NA	NA	NA	NA	31.5576	25.0202	NA	NA	20.1065
C3N-00573-N	Normal	CCRCC	NA	NA	NA	NA	NA	NA	NA	NA	NA	NA	NA	NA	NA	NA	NA	NA	NA	NA	NA	NA	NA	NA	NA	NA	NA	NA	NA	NA	NA	NA	NA	NA	NA	NA	NA	NA	NA	NA	NA	NA	NA	NA	30.501	22.6808	NA	NA	21.2053
C3N-00573-T	Tumor	CCRCC	NA	NA	NA	NA	NA	NA	NA	NA	NA	NA	NA	NA	NA	NA	NA	NA	NA	NA	NA	NA	NA	NA	NA	NA	NA	NA	NA	NA	NA	NA	NA	NA	NA	NA	NA	NA	NA	NA	NA	NA	NA	NA	32.156	24.0105	NA	NA	22.7393
C3N-00574-N	Normal	LUAD	NA	17.3311	NA	NA	NA	16.4612	NA	17.3071	NA	NA	NA	NA	NA	NA	NA	NA	NA	15.8725	NA	NA	17.2828	NA	NA	NA	18.3529	NA	18.8222	17.2189	NA	NA	NA	NA	NA	NA	NA	NA	NA	NA	NA	NA	NA	NA	31.8298	24.7519	NA	NA	20.61
C3N-00574-T	Tumor	LUAD	22.7759	18.4317	0.135491	NA	NA	16.2518	NA	18.8692	NA	NA	NA	NA	NA	NA	NA	19.2134	NA	16.9714	NA	NA	19.706	NA	NA	NA	18.1387	NA	20.08	18.2232	NA	NA	NA	NA	NA	NA	NA	NA	NA	NA	NA	NA	NA	NA	31.5316	25.9295	NA	NA	19.8103
C3N-00577-N	Normal	CCRCC	NA	NA	NA	NA	NA	NA	NA	NA	NA	NA	NA	NA	NA	NA	NA	NA	NA	NA	NA	NA	NA	NA	NA	NA	NA	NA	NA	NA	NA	NA	NA	NA	NA	NA	NA	NA	NA	NA	NA	NA	NA	NA	30.6367	22.8217	NA	NA	20.2288
C3N-00577-T	Tumor	CCRCC	NA	NA	NA	NA	NA	NA	NA	NA	NA	NA	NA	NA	NA	NA	NA	NA	NA	NA	NA	NA	NA	NA	NA	NA	NA	NA	NA	NA	NA	NA	NA	NA	NA	NA	NA	NA	NA	NA	NA	NA	NA	NA	31.7008	24.4919	NA	NA	23.0794
C3N-00578-N	Normal	LUAD	20.2259	17.2827	-0.863305	NA	NA	NA	NA	NA	NA	NA	NA	NA	NA	NA	NA	NA	NA	NA	NA	NA	17.2827	NA	NA	NA	NA	NA	NA	NA	NA	NA	NA	NA	NA	NA	NA	NA	NA	NA	NA	NA	NA	NA	32.3302	24.3386	NA	NA	20.0081
C3N-00578-T	Tumor	LUAD	21.1005	18.8081	0.610569	NA	NA	NA	NA	NA	NA	NA	NA	NA	NA	NA	NA	NA	NA	NA	NA	NA	18.8081	NA	NA	NA	NA	NA	NA	NA	NA	NA	NA	NA	NA	NA	NA	NA	NA	NA	NA	NA	NA	NA	32.0392	25.1233	NA	NA	20.4977
C3N-00579-N	Normal	LUAD	21.7397	16.2846	-1.95062	NA	NA	16.3478	NA	16.987	NA	NA	NA	NA	NA	NA	NA	16.1405	NA	15.7454	NA	NA	NA	NA	NA	NA	17.8298	NA	18.3933	15.4885	NA	NA	NA	NA	NA	NA	NA	NA	NA	NA	NA	NA	NA	13.3441	32.269	24.7149	NA	17.2866	19.9721
C3N-00579-T	Tumor	LUAD	22.3124	17.4267	-0.842246	NA	NA	16.3203	NA	18.5234	NA	NA	NA	NA	NA	NA	NA	19.5504	NA	16.235	NA	NA	NA	NA	NA	NA	18.1083	NA	19.5283	17.1693	NA	NA	NA	NA	NA	NA	NA	NA	NA	NA	NA	NA	NA	13.9783	31.5884	26.2994	NA	17.5361	19.6864
C3N-00580-N	Normal	LUAD	21.3624	16.3902	-1.8228	NA	NA	15.981	NA	NA	NA	NA	NA	NA	NA	NA	NA	NA	NA	15.8196	NA	NA	NA	NA	NA	NA	17.617	NA	18.9763	18.1118	NA	NA	NA	NA	11.8353	NA	NA	NA	NA	NA	NA	NA	NA	NA	32.2496	24.6338	NA	NA	19.9823
C3N-00580-T	Tumor	LUAD	22.0476	16.6913	-1.56206	NA	NA	15.6621	NA	NA	NA	NA	NA	NA	NA	NA	NA	NA	NA	16.1432	NA	NA	NA	NA	NA	NA	17.8103	NA	19.3375	18.2835	NA	NA	NA	NA	12.9109	NA	NA	NA	NA	NA	NA	NA	NA	NA	31.207	25.9575	NA	NA	20.6302
C3N-00646-N	Normal	CCRCC	NA	NA	NA	NA	NA	NA	NA	NA	NA	NA	NA	NA	NA	NA	NA	NA	NA	NA	NA	NA	NA	NA	NA	NA	NA	NA	NA	NA	NA	NA	NA	NA	NA	NA	NA	NA	NA	NA	NA	NA	NA	NA	30.3761	23.0108	NA	NA	20.5231
C3N-00646-T	Tumor	CCRCC	NA	NA	NA	NA	NA	NA	NA	NA	NA	NA	NA	NA	NA	NA	NA	NA	NA	NA	NA	NA	NA	NA	NA	NA	NA	NA	NA	NA	NA	NA	NA	NA	NA	NA	NA	NA	NA	NA	NA	NA	NA	NA	31.5447	24.001	NA	NA	22.8158
C3N-00661-T	Tumor	GBM	NA	17.8204	NA	NA	14.2119	NA	NA	19.2877	NA	NA	NA	NA	NA	NA	NA	NA	NA	NA	NA	NA	NA	NA	NA	NA	NA	NA	19.497	18.2852	NA	NA	NA	NA	NA	NA	NA	NA	NA	NA	NA	NA	NA	NA	32.6695	25.3484	NA	NA	NA
C3N-00662-T	Tumor	GBM	19.1062	19.1727	1.09264	NA	NA	NA	NA	NA	NA	NA	NA	NA	NA	NA	NA	NA	NA	NA	NA	NA	20.4157	NA	NA	NA	NA	17.0966	21.7493	19.2781	NA	NA	NA	NA	NA	NA	NA	NA	NA	17.3238	NA	NA	NA	NA	32.5949	26.0423	NA	15.6891	NA
C3N-00663-T	Tumor	GBM	NA	19.2275	NA	NA	NA	NA	NA	NA	NA	NA	NA	NA	NA	NA	NA	NA	NA	NA	NA	NA	NA	NA	NA	NA	NA	NA	NA	19.2275	NA	NA	NA	NA	NA	NA	NA	NA	NA	NA	NA	NA	NA	NA	33.251	25.0712	NA	NA	NA
C3N-00665-T	Tumor	GBM	NA	19.1531	NA	NA	NA	NA	NA	NA	NA	NA	NA	NA	NA	NA	NA	NA	NA	NA	NA	NA	NA	NA	NA	NA	NA	NA	NA	19.1531	NA	NA	NA	NA	NA	NA	NA	NA	NA	NA	NA	NA	NA	NA	32.9517	24.8881	NA	NA	NA
C3N-00704-N	Normal	LUAD	21.6502	16.7747	-1.45523	NA	NA	NA	NA	NA	NA	NA	NA	NA	NA	NA	NA	15.9035	NA	NA	NA	NA	17.5011	NA	NA	NA	NA	NA	NA	16.9194	NA	NA	NA	NA	NA	NA	NA	NA	NA	NA	NA	NA	NA	NA	32.141	24.3719	NA	NA	20.1481
C3N-00704-T	Tumor	LUAD	21.8645	18.9213	0.678767	NA	NA	NA	NA	NA	NA	NA	NA	NA	NA	NA	NA	19.7077	NA	NA	NA	NA	19.334	NA	NA	NA	NA	NA	NA	17.7222	NA	NA	NA	NA	NA	NA	NA	NA	NA	NA	NA	NA	NA	NA	31.5531	25.0859	NA	NA	20.4701
C3N-00709-N	Normal	PDA	NA	19.6723	NA	NA	NA	NA	NA	NA	NA	NA	NA	NA	NA	NA	NA	17.1188	NA	NA	NA	NA	NA	NA	NA	NA	NA	NA	NA	NA	NA	NA	NA	NA	NA	NA	NA	NA	NA	NA	NA	22.2258	NA	NA	30.5486	23.5597	NA	NA	NA
C3N-00709-T	Tumor	PDA	NA	19.1884	NA	NA	NA	NA	NA	NA	NA	NA	NA	NA	NA	NA	NA	17.445	NA	NA	NA	NA	NA	NA	NA	NA	NA	NA	NA	NA	NA	NA	NA	NA	NA	NA	NA	NA	NA	NA	NA	20.9319	NA	NA	32.1663	24.3	NA	NA	NA
C3N-00729-N	Normal	UCEC	NA	17.4848	NA	NA	NA	NA	NA	NA	NA	NA	16.6439	17.4659	17.6109	NA	NA	17.1585	NA	NA	NA	NA	17.6356	NA	NA	NA	NA	NA	21.1916	20.801	15.3767	16.1227	NA	18.3588	NA	NA	NA	NA	15.9058	15.5461	NA	NA	NA	NA	33.1478	25.1613	NA	20.0639	20.4171
C3N-00729-T	Tumor	UCEC	NA	18.6591	NA	NA	NA	NA	NA	NA	NA	NA	16.0689	16.7627	18.7994	NA	NA	19.5536	NA	NA	NA	NA	19.9513	NA	NA	NA	NA	NA	22.2739	21.8055	16.059	17.9354	NA	19.2019	NA	NA	NA	NA	18.0169	17.4809	NA	NA	NA	NA	31.4019	25.8475	NA	21.9761	21.1572
C3N-00733-N	Normal	CCRCC	NA	NA	NA	NA	NA	NA	NA	NA	NA	NA	NA	NA	NA	NA	NA	NA	NA	NA	NA	NA	NA	NA	NA	NA	NA	NA	NA	NA	NA	NA	NA	NA	NA	NA	NA	NA	NA	NA	NA	NA	NA	NA	30.2584	23.0059	NA	NA	20.5205
C3N-00733-T	Tumor	CCRCC	NA	NA	NA	NA	NA	NA	NA	NA	NA	NA	NA	NA	NA	NA	NA	NA	NA	NA	NA	NA	NA	NA	NA	NA	NA	NA	NA	NA	NA	NA	NA	NA	NA	NA	NA	NA	NA	NA	NA	NA	NA	NA	31.858	24.1506	NA	NA	21.5921
C3N-00734-T	Tumor	UCEC	19.6137	19.621	1.5111	NA	NA	17.6241	NA	22.0809	NA	NA	NA	NA	NA	NA	NA	NA	NA	19.0941	NA	NA	NA	NA	NA	NA	NA	NA	NA	20.7152	NA	NA	NA	18.5909	NA	NA	NA	NA	NA	NA	NA	NA	NA	NA	31.4015	25.5798	NA	21.2384	NA
C3N-00737-N	Normal	LUAD	20.7075	17.1602	-1.01421	NA	NA	NA	NA	NA	NA	NA	NA	NA	NA	NA	NA	NA	NA	15.7542	NA	NA	17.5117	NA	NA	NA	17.8983	NA	18.5488	16.0878	NA	NA	NA	NA	NA	NA	NA	NA	NA	NA	NA	NA	NA	NA	31.9215	24.7812	NA	NA	19.6739
C3N-00737-T	Tumor	LUAD	22.4093	18.7497	0.475124	NA	NA	NA	NA	NA	NA	NA	NA	NA	NA	NA	NA	NA	NA	17.0641	NA	NA	19.7865	NA	NA	NA	18.6901	NA	20.2254	17.9826	NA	NA	NA	NA	NA	NA	NA	NA	NA	NA	NA	NA	NA	NA	31.5193	26.0638	NA	NA	18.8384
C3N-00738-N	Normal	LUAD	NA	18.0988	NA	NA	NA	NA	NA	NA	NA	NA	NA	NA	NA	NA	NA	NA	NA	NA	NA	NA	18.0147	NA	NA	NA	NA	NA	NA	18.1829	NA	NA	NA	NA	NA	NA	NA	NA	NA	NA	NA	NA	NA	NA	32.2404	24.3631	NA	NA	20.3783
C3N-00738-T	Tumor	LUAD	NA	18.3046	NA	NA	NA	NA	NA	NA	NA	NA	NA	NA	NA	NA	NA	NA	NA	NA	NA	NA	17.873	NA	NA	NA	NA	NA	NA	18.7361	NA	NA	NA	NA	NA	NA	NA	NA	NA	NA	NA	NA	NA	NA	32.0881	24.3	NA	NA	19.3424
C3N-00743-T	Tumor	UCEC	20.2253	18.9607	0.814722	NA	NA	NA	NA	22.5603	NA	NA	NA	NA	NA	NA	NA	18.188	14.6815	19.6129	NA	NA	19.1656	NA	NA	NA	NA	NA	20.2362	20.6824	NA	NA	NA	18.8325	NA	NA	NA	NA	17.1535	NA	18.4942	NA	NA	NA	31.8439	26.5259	NA	21.8882	20.5028
C3N-00822-T	Tumor	HNSCC	19.0592	19.3544	1.27706	NA	NA	NA	NA	NA	NA	NA	NA	NA	NA	NA	NA	17.0048	NA	NA	NA	NA	NA	NA	NA	NA	NA	NA	21.5755	18.5779	NA	NA	NA	19.2366	NA	NA	NA	NA	NA	NA	NA	20.3771	NA	NA	30.7833	25.4725	NA	NA	19.7957
C3N-00825-T	Tumor	HNSCC	18.9204	18.1364	0.0673049	NA	NA	NA	NA	20.1589	NA	NA	NA	NA	NA	NA	NA	16.8501	NA	NA	NA	NA	NA	NA	NA	NA	18.0155	NA	20.9117	17.9943	NA	NA	NA	16.8662	NA	NA	NA	NA	NA	NA	NA	NA	NA	16.158	31.4493	25.1592	NA	NA	19.4592
C3N-00828-T	Tumor	HNSCC	19.5466	18.6534	0.54738	NA	NA	NA	NA	NA	NA	NA	NA	NA	NA	NA	NA	16.2553	NA	NA	NA	NA	NA	NA	NA	NA	NA	NA	20.8365	18.0568	NA	NA	NA	18.7577	NA	NA	NA	NA	NA	NA	NA	19.3606	NA	NA	31.4476	25.9137	NA	NA	19.7789
C3N-00829-N	Normal	HNSCC	18.2328	19.2067	1.1781	NA	NA	NA	NA	NA	NA	NA	NA	NA	NA	NA	NA	15.3176	NA	NA	NA	NA	NA	NA	NA	NA	NA	NA	21.2609	18.0927	NA	NA	NA	18.9825	NA	NA	NA	NA	NA	NA	NA	22.3799	NA	NA	32.4955	25.2949	NA	NA	20.1415
C3N-00829-T	Tumor	HNSCC	20.1918	19.3431	1.19915	NA	NA	NA	NA	NA	NA	NA	NA	NA	NA	NA	NA	17.6173	NA	NA	NA	NA	NA	NA	NA	NA	NA	NA	21.5493	18.6873	NA	NA	NA	19.2512	NA	NA	NA	NA	NA	NA	NA	19.6106	NA	NA	31.3975	26.0423	NA	NA	20.3046
C3N-00831-N	Normal	CCRCC	NA	NA	NA	NA	NA	NA	NA	NA	NA	NA	NA	NA	NA	NA	NA	NA	NA	NA	NA	NA	NA	NA	NA	NA	NA	NA	NA	NA	NA	NA	NA	NA	NA	NA	NA	NA	NA	NA	NA	NA	NA	NA	30.4324	23.0775	NA	NA	20.5479
C3N-00831-T	Tumor	CCRCC	NA	NA	NA	NA	NA	NA	NA	NA	NA	NA	NA	NA	NA	NA	NA	NA	NA	NA	NA	NA	NA	NA	NA	NA	NA	NA	NA	NA	NA	NA	NA	NA	NA	NA	NA	NA	NA	NA	NA	NA	NA	NA	31.5722	24.3811	NA	NA	21.9406
C3N-00832-T	Tumor	CCRCC	NA	NA	NA	NA	NA	NA	NA	NA	NA	NA	NA	NA	NA	NA	NA	NA	NA	NA	NA	NA	NA	NA	NA	NA	NA	NA	NA	NA	NA	NA	NA	NA	NA	NA	NA	NA	NA	NA	NA	NA	NA	NA	31.2854	23.0689	NA	NA	21.1709
C3N-00834-N	Normal	CCRCC	18.5297	16.4825	-1.56358	NA	NA	NA	NA	NA	NA	NA	NA	NA	NA	NA	NA	NA	NA	NA	NA	NA	15.4726	NA	NA	NA	NA	NA	17.4924	NA	NA	NA	NA	NA	NA	NA	NA	NA	NA	NA	NA	NA	NA	NA	30.3228	23.4042	NA	NA	20.0209
C3N-00834-T	Tumor	CCRCC	18.0238	16.5786	-1.43775	NA	NA	NA	NA	NA	NA	NA	NA	NA	NA	NA	NA	NA	NA	NA	NA	NA	15.2891	NA	NA	NA	NA	NA	17.868	NA	NA	NA	NA	NA	NA	NA	NA	NA	NA	NA	NA	NA	NA	NA	31.85	23.6209	NA	NA	22.2379
C3N-00836-T	Tumor	UCEC	NA	18.3614	NA	NA	NA	NA	NA	NA	NA	NA	15.8528	16.9215	18.0073	NA	NA	18.1455	NA	NA	NA	NA	20.5809	NA	NA	NA	NA	NA	21.3574	21.4532	16.2157	17.508	NA	18.8859	NA	NA	NA	NA	17.8219	17.5872	NA	NA	NA	NA	31.9638	26.1347	NA	21.1973	20.7889
C3N-00846-T	Tumor	HNSCC	18.9596	18.7134	0.642027	NA	NA	NA	NA	NA	NA	NA	NA	NA	NA	NA	NA	16.2012	NA	NA	NA	NA	18.4959	NA	NA	NA	NA	NA	21.4618	NA	NA	NA	NA	18.6949	NA	NA	NA	NA	NA	NA	NA	NA	NA	NA	31.393	25.1753	NA	NA	NA
C3N-00847-T	Tumor	UCEC	NA	18.0806	NA	NA	NA	17.7534	NA	22.1715	NA	NA	NA	16.8387	NA	NA	NA	17.8387	14.6099	19.0656	NA	NA	NA	NA	NA	NA	NA	NA	19.8896	20.5522	NA	17.1367	NA	16.4572	NA	NA	NA	NA	17.2435	NA	17.4099	NA	NA	NA	33.0411	26.3041	NA	21.5545	20.6941
C3N-00848-T	Tumor	UCEC	NA	18.3254	NA	14.2896	NA	NA	NA	NA	NA	NA	NA	NA	NA	NA	NA	NA	NA	NA	NA	NA	20.7153	NA	NA	NA	NA	NA	21.185	20.0717	16.0403	NA	NA	NA	NA	NA	NA	NA	17.6504	NA	NA	NA	NA	NA	32.0134	26.1303	NA	20.3259	NA
C3N-00850-T	Tumor	UCEC	19.6206	19.883	1.77264	NA	NA	17.7742	NA	22.3636	NA	NA	NA	NA	NA	NA	NA	NA	NA	18.7029	NA	NA	NA	NA	NA	NA	NA	NA	NA	21.4821	NA	NA	NA	19.0921	NA	NA	NA	NA	NA	NA	NA	NA	NA	NA	31.7655	25.7652	NA	20.898	NA
C3N-00852-N	Normal	CCRCC	18.3215	NA	NA	NA	NA	NA	NA	NA	NA	NA	NA	NA	NA	NA	NA	NA	NA	NA	NA	NA	NA	NA	NA	NA	NA	NA	NA	NA	NA	NA	NA	NA	NA	NA	NA	NA	NA	NA	NA	NA	NA	NA	31.0375	22.9861	NA	NA	20.3141
C3N-00852-T	Tumor	CCRCC	16.5879	NA	NA	NA	NA	NA	NA	NA	NA	NA	NA	NA	NA	NA	NA	NA	NA	NA	NA	NA	NA	NA	NA	NA	NA	NA	NA	NA	NA	NA	NA	NA	NA	NA	NA	NA	NA	NA	NA	NA	NA	NA	30.9028	24.4834	NA	NA	21.7448
C3N-00857-N	Normal	HNSCC	19.1067	17.5559	-0.524197	NA	NA	NA	NA	NA	NA	NA	NA	NA	NA	NA	NA	16.1177	NA	14.91	NA	NA	17.4125	NA	NA	NA	NA	NA	21.0397	17.0979	NA	NA	NA	18.5534	NA	NA	NA	NA	17.0135	18.1211	NA	19.8619	NA	15.4312	31.8012	25.4306	NA	NA	20.6819
C3N-00857-T	Tumor	HNSCC	19.5163	18.1811	0.0768838	NA	NA	NA	NA	NA	NA	NA	NA	NA	NA	NA	NA	18.3156	NA	15.0416	NA	NA	18.482	NA	NA	NA	NA	NA	21.633	17.9593	NA	NA	NA	18.8585	NA	NA	NA	NA	17.2406	18.5754	NA	19.5284	NA	16.1765	31.4681	25.7641	NA	NA	21.1699
C3N-00858-N	Normal	UCEC	20.7497	19.1774	1.00057	NA	NA	17.8864	NA	21.1547	NA	NA	NA	NA	NA	NA	NA	NA	NA	18.025	NA	NA	NA	NA	NA	NA	NA	NA	NA	20.8152	NA	NA	NA	18.0058	NA	NA	NA	NA	NA	NA	NA	NA	NA	NA	33.3514	24.8648	NA	20.2683	NA
C3N-00858-T	Tumor	UCEC	19.3669	19.695	1.59963	NA	NA	17.8606	NA	22.3475	NA	NA	NA	NA	NA	NA	NA	NA	NA	19.1025	NA	NA	NA	NA	NA	NA	NA	NA	NA	20.9026	NA	NA	NA	18.2621	NA	NA	NA	NA	NA	NA	NA	NA	NA	NA	32.1304	26.1516	NA	20.4163	NA
C3N-00866-N	Normal	UCEC	NA	18.3945	NA	NA	NA	NA	NA	21.0794	NA	NA	NA	NA	NA	NA	NA	NA	NA	18.1502	NA	NA	NA	NA	NA	NA	NA	NA	21.2394	21.0207	14.3783	NA	NA	NA	NA	NA	NA	NA	16.7752	16.118	NA	NA	NA	NA	32.8484	24.7604	NA	20.6922	NA
C3N-00866-T	Tumor	UCEC	NA	18.9421	NA	NA	NA	NA	NA	21.7439	NA	NA	NA	NA	NA	NA	NA	NA	NA	18.7481	NA	NA	NA	NA	NA	NA	NA	NA	21.0179	20.6183	16.1415	NA	NA	NA	NA	NA	NA	NA	16.8085	17.5168	NA	NA	NA	NA	32.0497	25.4082	NA	21.0729	NA
C3N-00871-T	Tumor	HNSCC	NA	17.326	NA	NA	NA	NA	15.0079	20.3976	NA	NA	NA	NA	NA	NA	NA	NA	NA	NA	NA	NA	NA	16.5508	NA	16.746	NA	NA	17.8971	18.1298	NA	NA	NA	NA	NA	NA	NA	NA	NA	17.2651	NA	NA	NA	16.6137	30.8874	25.2388	NA	NA	20.4509
C3N-00880-T	Tumor	UCEC	19.4066	18.551	0.453238	NA	NA	NA	NA	21.6086	NA	NA	NA	NA	NA	NA	NA	18.297	14.846	18.7036	NA	NA	20.0275	NA	NA	NA	NA	NA	19.7038	19.76	NA	NA	NA	18.3033	NA	NA	NA	NA	17.0533	NA	17.2069	NA	NA	NA	32.2846	25.4503	NA	20.6682	20.5043
C3N-00953-N	Normal	CCRCC	NA	NA	NA	NA	NA	NA	NA	NA	NA	NA	NA	NA	NA	NA	NA	NA	NA	NA	NA	NA	NA	NA	NA	NA	NA	NA	NA	NA	NA	NA	NA	NA	NA	NA	NA	NA	NA	NA	NA	NA	NA	NA	30.0506	22.6515	NA	NA	20.8827
C3N-00953-T	Tumor	CCRCC	NA	NA	NA	NA	NA	NA	NA	NA	NA	NA	NA	NA	NA	NA	NA	NA	NA	NA	NA	NA	NA	NA	NA	NA	NA	NA	NA	NA	NA	NA	NA	NA	NA	NA	NA	NA	NA	NA	NA	NA	NA	NA	31.4837	24.3147	NA	NA	21.6054
C3N-00957-N	Normal	PDA	18.4379	16.1171	-1.92363	NA	NA	NA	NA	17.8066	NA	NA	NA	NA	NA	NA	NA	16.7837	NA	NA	NA	NA	NA	NA	NA	NA	NA	NA	17.8486	NA	NA	NA	NA	16.0921	NA	NA	NA	NA	14.5958	13.5757	NA	NA	NA	NA	30.987	24.2264	NA	NA	17.2521
C3N-00957-T	Tumor	PDA	19.5161	16.4309	-1.67331	NA	NA	NA	NA	18.4393	NA	NA	NA	NA	NA	NA	NA	17.6336	NA	NA	NA	NA	NA	NA	NA	NA	NA	NA	18.7616	15.6618	NA	NA	NA	16.5156	NA	NA	NA	NA	14.367	13.6373	NA	NA	NA	NA	32.4357	24.2088	NA	NA	17.7592
C3N-00959-N	Normal	LUAD	NA	18.1107	NA	NA	NA	NA	NA	NA	NA	NA	NA	NA	NA	NA	NA	NA	NA	NA	NA	NA	17.7628	NA	NA	NA	NA	NA	NA	18.4586	NA	NA	NA	NA	NA	NA	NA	NA	NA	NA	NA	NA	NA	NA	31.896	24.7286	NA	NA	21.0685
C3N-00959-T	Tumor	LUAD	NA	18.3277	NA	NA	NA	NA	NA	NA	NA	NA	NA	NA	NA	NA	NA	NA	NA	NA	NA	NA	18.401	NA	NA	NA	NA	NA	NA	18.2544	NA	NA	NA	NA	NA	NA	NA	NA	NA	NA	NA	NA	NA	NA	31.6016	24.7908	NA	NA	20.5079
C3N-01003-T	Tumor	UCEC	17.3864	19.3489	1.37013	NA	NA	17.8537	NA	21.487	NA	NA	NA	NA	17.7561	NA	NA	NA	NA	18.9667	NA	NA	19.4652	NA	NA	NA	NA	NA	22.5589	NA	NA	NA	NA	NA	NA	NA	NA	NA	NA	NA	17.3546	NA	NA	NA	32.9303	25.1375	NA	20.542	20.2731
C3N-01011-N	Normal	PDA	NA	17.163	NA	NA	NA	NA	NA	NA	NA	NA	NA	NA	NA	NA	NA	17.163	NA	NA	NA	NA	NA	NA	NA	NA	NA	NA	NA	NA	NA	NA	NA	NA	NA	NA	NA	NA	NA	NA	NA	NA	NA	NA	31.2559	24.1695	NA	NA	NA
C3N-01011-T	Tumor	PDA	NA	17.4672	NA	NA	NA	NA	NA	NA	NA	NA	NA	NA	NA	NA	NA	17.4672	NA	NA	NA	NA	NA	NA	NA	NA	NA	NA	NA	NA	NA	NA	NA	NA	NA	NA	NA	NA	NA	NA	NA	NA	NA	NA	31.9278	24.0095	NA	NA	NA
C3N-01012-T	Tumor	PDA	19.369	16.0192	-2.07629	14.7853	NA	NA	NA	18.4326	NA	NA	NA	NA	NA	NA	NA	18.9225	NA	NA	NA	NA	17.4252	NA	NA	NA	NA	NA	18.5636	13.4538	NA	13.4133	NA	NA	NA	NA	NA	NA	NA	13.1577	NA	NA	NA	NA	31.7541	24.1639	NA	NA	17.1917
C3N-01016-N	Normal	LUAD	21.5934	16.387	-1.83955	NA	NA	16.1564	NA	NA	NA	NA	NA	NA	NA	NA	NA	NA	NA	15.7893	NA	NA	NA	NA	NA	NA	17.7643	NA	18.6927	18.1913	NA	NA	NA	NA	11.728	NA	NA	NA	NA	NA	NA	NA	NA	NA	32.4145	24.6305	NA	NA	19.9924
C3N-01016-T	Tumor	LUAD	22.6451	16.9985	-1.28997	NA	NA	16.0076	NA	NA	NA	NA	NA	NA	NA	NA	NA	NA	NA	16.8659	NA	NA	NA	NA	NA	NA	18.5301	NA	19.3087	18.2541	NA	NA	NA	NA	13.0248	NA	NA	NA	NA	NA	NA	NA	NA	NA	31.5372	25.6352	NA	NA	20.4563
C3N-01017-N	Normal	LSCC	20.1839	18.2929	0.149316	NA	NA	15.9979	NA	19.1065	NA	NA	NA	NA	NA	NA	NA	NA	NA	18.9442	NA	NA	NA	NA	NA	NA	18.5202	NA	NA	18.7513	NA	NA	NA	18.437	NA	NA	NA	NA	NA	NA	NA	NA	NA	NA	31.9875	25.2468	NA	NA	20.3645
C3N-01017-T	Tumor	LSCC	21.6826	19.1138	0.881984	NA	NA	16.3176	NA	21.5128	NA	NA	NA	NA	NA	NA	NA	20.1921	NA	19.6007	NA	NA	NA	NA	NA	NA	19.4503	NA	NA	19.3668	NA	NA	NA	17.3563	NA	NA	NA	NA	NA	NA	NA	NA	NA	NA	31.0663	26.7772	NA	NA	19.7693
C3N-01018-N	Normal	LSCC	19.9415	17.7883	-0.340973	NA	NA	NA	NA	NA	NA	NA	NA	NA	NA	NA	NA	17.6526	NA	NA	NA	NA	17.9214	NA	NA	NA	NA	NA	18.6264	17.9713	NA	NA	NA	17.2413	NA	NA	NA	NA	17.3167	NA	NA	NA	NA	NA	32.0879	24.889	NA	NA	20.4917
C3N-01018-T	Tumor	LSCC	20.3134	19.2571	1.10595	NA	NA	NA	NA	NA	NA	NA	NA	NA	NA	NA	NA	20.5767	NA	NA	NA	NA	19.4646	NA	NA	NA	NA	NA	19.8561	19.9221	NA	NA	NA	17.5154	NA	NA	NA	NA	18.2077	NA	NA	NA	NA	NA	30.8421	26.8498	NA	NA	20.3161
C3N-01020-N	Normal	LSCC	20.1355	18.1217	-0.0189673	NA	17.0086	NA	NA	NA	NA	NA	NA	NA	NA	NA	NA	NA	NA	NA	NA	NA	NA	NA	NA	NA	NA	NA	19.4846	18.5825	NA	NA	NA	NA	NA	NA	NA	NA	17.4111	NA	NA	NA	NA	NA	32.1268	25.1403	NA	18.03	20.6871
C3N-01020-T	Tumor	LSCC	20.8415	19.1454	0.963078	NA	17.44	NA	NA	NA	NA	NA	NA	NA	NA	NA	NA	NA	NA	NA	NA	NA	NA	NA	NA	NA	NA	NA	20.8065	20.3231	NA	NA	NA	NA	NA	NA	NA	NA	18.0117	NA	NA	NA	NA	NA	31.4839	26.2869	NA	19.1428	20.5467
C3N-01021-N	Normal	LUAD	20.8232	17.0401	-1.14112	NA	NA	16.1399	NA	16.8104	NA	NA	NA	NA	NA	NA	NA	NA	NA	15.2983	NA	NA	16.8333	NA	NA	NA	17.8513	NA	18.5797	17.7676	NA	NA	NA	NA	NA	NA	NA	NA	NA	NA	NA	NA	NA	NA	32.0209	24.6197	NA	NA	20.1278
C3N-01021-T	Tumor	LUAD	21.3403	17.8229	-0.388744	NA	NA	15.8098	NA	18.0314	NA	NA	NA	NA	NA	NA	NA	18.9935	NA	16.3033	NA	NA	19.1408	NA	NA	NA	17.7737	NA	19.0369	17.4938	NA	NA	NA	NA	NA	NA	NA	NA	NA	NA	NA	NA	NA	NA	31.7194	24.8454	NA	NA	19.9233
C3N-01023-N	Normal	LUAD	22.427	15.8797	-2.39599	15.8397	NA	NA	NA	NA	NA	NA	NA	NA	NA	NA	NA	NA	NA	NA	NA	NA	NA	NA	NA	NA	NA	NA	18.8233	15.8193	NA	NA	NA	NA	NA	NA	NA	NA	NA	NA	NA	NA	NA	13.0364	32.2633	24.6657	NA	NA	19.9311
C3N-01023-T	Tumor	LUAD	23.0083	17.1063	-1.20357	16.4295	NA	NA	NA	NA	NA	NA	NA	NA	NA	NA	NA	NA	NA	NA	NA	NA	NA	NA	NA	NA	NA	NA	20.6223	17.1638	NA	NA	NA	NA	NA	NA	NA	NA	NA	NA	NA	NA	NA	14.2098	31.4189	25.2616	NA	NA	20.445
C3N-01024-N	Normal	LUAD	22.0474	15.6599	-2.59336	15.1398	NA	NA	NA	NA	NA	NA	NA	NA	NA	NA	NA	NA	NA	NA	NA	NA	NA	NA	NA	NA	NA	NA	18.6886	15.6147	NA	NA	NA	NA	NA	NA	NA	NA	NA	NA	NA	NA	NA	13.1967	32.3103	24.6281	NA	NA	19.9374
C3N-01024-T	Tumor	LUAD	22.7385	17.0324	-1.26161	16.6078	NA	NA	NA	NA	NA	NA	NA	NA	NA	NA	NA	NA	NA	NA	NA	NA	NA	NA	NA	NA	NA	NA	19.6768	17.6495	NA	NA	NA	NA	NA	NA	NA	NA	NA	NA	NA	NA	NA	14.1955	31.537	25.2225	NA	NA	19.5488
C3N-01025-N	Normal	LSCC	20.3941	17.4162	-0.7397	15.0228	18.1186	NA	NA	19.26	NA	NA	NA	NA	NA	NA	NA	17.3098	NA	NA	NA	13.6066	17.5219	NA	NA	NA	19.125	NA	19.0472	NA	NA	NA	NA	17.9568	NA	NA	NA	NA	17.1935	NA	NA	NA	NA	NA	32.1099	25.4847	15.5273	18.5012	NA
C3N-01025-T	Tumor	LSCC	22.1346	18.8789	0.620502	17.7712	16.8089	NA	NA	21.4569	NA	NA	NA	NA	NA	NA	NA	20.8651	NA	NA	NA	13.9615	19.6289	NA	NA	NA	18.3693	NA	20.882	20.4021	NA	NA	NA	18.7873	NA	NA	NA	NA	18.735	NA	NA	NA	NA	NA	30.7925	27.04	15.1754	19.4354	NA
C3N-01028-N	Normal	LSCC	20.1904	17.0699	-1.07399	NA	NA	16.0157	NA	19.3491	NA	NA	NA	NA	NA	NA	NA	NA	NA	NA	NA	NA	NA	NA	NA	NA	18.2148	NA	18.8619	18.2533	NA	NA	NA	11.7248	NA	NA	NA	NA	NA	NA	NA	NA	NA	NA	32.2436	25.0462	NA	NA	19.9776
C3N-01028-T	Tumor	LSCC	21.9864	18.8671	0.61738	NA	NA	16.6732	NA	21.6056	NA	NA	NA	NA	NA	NA	NA	NA	NA	NA	NA	NA	NA	NA	NA	NA	18.9352	NA	21.0023	20.4591	NA	NA	NA	14.5272	NA	NA	NA	NA	NA	NA	NA	NA	NA	NA	31.4057	26.266	NA	NA	19.8873
C3N-01030-N	Normal	LUAD	20.3672	18.1734	0.0191081	NA	NA	NA	NA	NA	NA	NA	NA	NA	NA	NA	NA	NA	NA	NA	NA	NA	17.5914	NA	NA	NA	NA	NA	18.7555	NA	NA	NA	NA	NA	NA	NA	NA	NA	NA	NA	NA	NA	NA	NA	32.402	24.3481	NA	NA	20.4706
C3N-01030-T	Tumor	LUAD	22.4354	19.213	0.936864	NA	NA	NA	NA	NA	NA	NA	NA	NA	NA	NA	NA	18.896	NA	NA	NA	NA	18.9612	NA	NA	NA	NA	NA	19.7819	NA	NA	NA	NA	NA	NA	NA	NA	NA	NA	NA	NA	NA	NA	NA	32.084	25.6538	NA	NA	20.3302
C3N-01071-N	Normal	LUAD	NA	16.8023	NA	NA	NA	NA	NA	NA	NA	NA	NA	NA	NA	NA	NA	NA	NA	15.6398	NA	NA	17.4131	NA	NA	NA	17.7147	NA	18.734	18.4562	NA	NA	NA	NA	NA	NA	NA	NA	NA	NA	NA	NA	NA	12.8564	32.0056	24.7506	NA	NA	20.6022
C3N-01071-T	Tumor	LUAD	NA	18.5335	NA	NA	NA	NA	NA	NA	NA	NA	NA	NA	NA	NA	NA	20.4909	NA	16.5022	NA	NA	20.3062	NA	NA	NA	18.7691	NA	20.2982	18.9469	NA	NA	NA	NA	NA	NA	NA	NA	NA	NA	NA	NA	NA	14.4208	31.715	26.4641	NA	NA	19.4677
C3N-01072-N	Normal	LUAD	21.3178	17.5437	-0.666585	NA	NA	NA	NA	17.0764	NA	NA	NA	NA	NA	NA	NA	NA	NA	NA	NA	NA	17.5297	NA	NA	NA	17.6176	NA	NA	17.9514	NA	NA	NA	NA	NA	NA	NA	NA	NA	NA	NA	NA	NA	NA	32.3359	24.779	NA	NA	20.5728
C3N-01072-T	Tumor	LUAD	21.9278	18.1833	-0.0629126	NA	NA	NA	NA	18.1703	NA	NA	NA	NA	NA	NA	NA	NA	NA	NA	NA	NA	18.0806	NA	NA	NA	17.8731	NA	NA	18.6094	NA	NA	NA	NA	NA	NA	NA	NA	NA	NA	NA	NA	NA	NA	31.7032	25.5063	NA	NA	19.9326
C3N-01074-T	Tumor	LUAD	NA	18.3695	NA	NA	NA	NA	NA	NA	NA	NA	NA	NA	NA	NA	NA	19.726	NA	16.6153	NA	NA	19.8677	NA	NA	NA	18.7686	NA	20.1781	19.0091	NA	NA	NA	NA	NA	NA	NA	NA	NA	NA	NA	NA	NA	14.4214	31.3697	25.5025	NA	NA	20.1281
C3N-01165-T	Tumor	PDA	NA	17.1591	NA	NA	NA	NA	NA	NA	NA	NA	NA	NA	NA	NA	NA	18.8531	NA	NA	NA	NA	NA	NA	NA	NA	NA	NA	NA	15.465	NA	NA	NA	NA	NA	NA	NA	NA	NA	NA	NA	NA	NA	NA	31.6654	23.5333	NA	NA	NA
C3N-01166-T	Tumor	PDA	NA	16.7921	NA	NA	NA	NA	NA	NA	NA	NA	NA	NA	NA	NA	NA	NA	NA	NA	NA	NA	16.7921	NA	NA	NA	NA	NA	NA	NA	NA	NA	NA	NA	NA	NA	NA	NA	NA	NA	NA	NA	NA	NA	31.335	23.9906	NA	NA	17.6613
C3N-01167-T	Tumor	PDA	19.4375	16.414	-1.68555	16.5028	NA	NA	NA	18.7335	NA	NA	NA	NA	NA	NA	NA	18.0803	NA	NA	NA	NA	17.762	NA	NA	NA	NA	NA	18.9286	13.5776	NA	14.1639	NA	NA	NA	NA	NA	NA	NA	13.5635	NA	NA	NA	NA	31.8855	24.365	NA	NA	17.323
C3N-01168-T	Tumor	PDA	NA	17.5652	NA	NA	NA	NA	NA	NA	NA	NA	NA	NA	NA	NA	NA	18.5257	NA	16.6048	NA	NA	NA	NA	NA	NA	NA	NA	NA	NA	NA	NA	NA	NA	NA	NA	NA	NA	NA	NA	NA	NA	NA	NA	31.1436	24.1886	NA	NA	NA
C3N-01175-N	Normal	CCRCC	NA	12.5251	NA	NA	NA	NA	NA	NA	NA	NA	NA	NA	NA	NA	NA	NA	NA	NA	NA	NA	NA	NA	NA	NA	NA	NA	NA	NA	NA	NA	NA	NA	12.5251	NA	NA	NA	NA	NA	NA	NA	NA	NA	30.2151	23.2112	NA	NA	20.4399
C3N-01175-T	Tumor	CCRCC	NA	13.2545	NA	NA	NA	NA	NA	NA	NA	NA	NA	NA	NA	NA	NA	NA	NA	NA	NA	NA	NA	NA	NA	NA	NA	NA	NA	NA	NA	NA	NA	NA	13.2545	NA	NA	NA	NA	NA	NA	NA	NA	NA	30.1269	23.7403	NA	NA	21.1271
C3N-01176-N	Normal	CCRCC	18.0533	15.7161	-2.30197	NA	NA	NA	NA	NA	14.1412	NA	NA	NA	NA	NA	NA	NA	NA	NA	NA	NA	NA	NA	NA	NA	NA	NA	17.3861	17.3795	NA	NA	NA	13.9575	NA	NA	NA	NA	NA	NA	NA	NA	NA	NA	30.3894	23.3062	NA	NA	20.6829
C3N-01176-T	Tumor	CCRCC	17.9671	16.413	-1.59992	NA	NA	NA	NA	NA	14.6786	NA	NA	NA	NA	NA	NA	NA	NA	NA	NA	NA	NA	NA	NA	NA	NA	NA	17.7629	17.6272	NA	NA	NA	15.5834	NA	NA	NA	NA	NA	NA	NA	NA	NA	NA	31.1954	24.5665	NA	NA	22.5644
C3N-01178-N	Normal	CCRCC	17.2206	NA	NA	NA	NA	NA	NA	NA	NA	NA	NA	NA	NA	NA	NA	NA	NA	NA	NA	NA	NA	NA	NA	NA	NA	NA	NA	NA	NA	NA	NA	NA	NA	NA	NA	NA	NA	NA	NA	NA	NA	NA	30.2875	22.9495	NA	NA	20.7304
C3N-01178-T	Tumor	CCRCC	18.7677	NA	NA	NA	NA	NA	NA	NA	NA	NA	NA	NA	NA	NA	NA	NA	NA	NA	NA	NA	NA	NA	NA	NA	NA	NA	NA	NA	NA	NA	NA	NA	NA	NA	NA	NA	NA	NA	NA	NA	NA	NA	31.2838	24.7272	NA	NA	22.0188
C3N-01179-N	Normal	CCRCC	NA	NA	NA	NA	NA	NA	NA	NA	NA	NA	NA	NA	NA	NA	NA	NA	NA	NA	NA	NA	NA	NA	NA	NA	NA	NA	NA	NA	NA	NA	NA	NA	NA	NA	NA	NA	NA	NA	NA	NA	NA	NA	30.5314	22.799	NA	NA	NA
C3N-01179-T	Tumor	CCRCC	NA	NA	NA	NA	NA	NA	NA	NA	NA	NA	NA	NA	NA	NA	NA	NA	NA	NA	NA	NA	NA	NA	NA	NA	NA	NA	NA	NA	NA	NA	NA	NA	NA	NA	NA	NA	NA	NA	NA	NA	NA	NA	31.8613	23.5452	NA	NA	NA
C3N-01180-T	Tumor	CCRCC	NA	NA	NA	NA	NA	NA	NA	NA	NA	NA	NA	NA	NA	NA	NA	NA	NA	NA	NA	NA	NA	NA	NA	NA	NA	NA	NA	NA	NA	NA	NA	NA	NA	NA	NA	NA	NA	NA	NA	NA	NA	NA	30.0167	23.4312	NA	NA	21.9169
C3N-01192-T	Tumor	GBM	18.3255	16.8841	-1.14995	NA	NA	NA	NA	19.6072	NA	NA	NA	NA	NA	NA	NA	18.5055	NA	14.871	NA	NA	NA	17.0647	NA	NA	NA	16.0841	19.2892	18.043	NA	NA	NA	13.4422	NA	NA	NA	NA	15.0502	NA	NA	NA	NA	NA	32.9313	24.9541	NA	16.2773	NA
C3N-01194-N	Normal	LSCC	20.4432	17.9678	-0.191022	NA	16.7489	NA	NA	NA	NA	NA	NA	NA	NA	NA	NA	NA	NA	NA	NA	NA	NA	NA	NA	NA	NA	NA	19.3663	18.3786	NA	NA	NA	NA	NA	NA	NA	NA	17.3774	NA	NA	NA	NA	NA	32.1104	25.1754	NA	18.0369	20.7525
C3N-01194-T	Tumor	LSCC	21.5384	19.0938	0.870492	NA	17.2106	NA	NA	NA	NA	NA	NA	NA	NA	NA	NA	NA	NA	NA	NA	NA	NA	NA	NA	NA	NA	NA	20.5815	20.4307	NA	NA	NA	NA	NA	NA	NA	NA	18.1524	NA	NA	NA	NA	NA	31.2385	26.0155	NA	18.4154	19.6892
C3N-01196-T	Tumor	GBM	19.2365	19.2445	1.15676	NA	NA	NA	NA	NA	NA	NA	NA	NA	NA	NA	NA	NA	NA	NA	NA	NA	20.2896	NA	NA	NA	NA	18.198	21.6205	19.0481	NA	NA	NA	NA	NA	NA	NA	NA	NA	17.0663	NA	NA	NA	NA	32.7125	26.5656	NA	16.4276	NA
C3N-01200-N	Normal	CCRCC	NA	13.2504	NA	NA	NA	NA	NA	NA	NA	NA	NA	NA	NA	NA	NA	NA	NA	NA	NA	NA	NA	NA	NA	NA	NA	NA	NA	NA	NA	NA	NA	NA	13.2504	NA	NA	NA	NA	NA	NA	NA	NA	NA	31.0354	23.6969	NA	NA	20.1998
C3N-01200-T	Tumor	CCRCC	NA	14.968	NA	NA	NA	NA	NA	NA	NA	NA	NA	NA	NA	NA	NA	NA	NA	NA	NA	NA	NA	NA	NA	NA	NA	NA	NA	NA	NA	NA	NA	NA	14.968	NA	NA	NA	NA	NA	NA	NA	NA	NA	31.5469	24.529	NA	NA	21.7001
C3N-01211-N	Normal	UCEC	19.9913	18.7954	0.663235	NA	NA	18.0939	NA	21.0483	NA	NA	NA	NA	17.9864	NA	NA	NA	NA	NA	NA	NA	NA	NA	NA	NA	NA	NA	19.61	20.5667	NA	NA	NA	18.0243	NA	NA	NA	NA	NA	16.2385	NA	NA	NA	NA	32.9976	25.3006	NA	20.596	21.3706
C3N-01211-T	Tumor	UCEC	19.5389	19.7268	1.62124	NA	NA	17.8341	NA	22.8539	NA	NA	NA	NA	17.5154	NA	NA	NA	NA	NA	NA	NA	NA	NA	NA	NA	NA	NA	20.7517	21.9541	NA	NA	NA	19.4542	NA	NA	NA	NA	NA	17.7241	NA	NA	NA	NA	31.1551	27.0478	NA	20.8279	23.5735
C3N-01212-T	Tumor	UCEC	NA	18.285	NA	NA	NA	NA	NA	NA	NA	NA	16.697	17.2454	18.0808	NA	NA	18.3862	NA	NA	NA	NA	20.7723	NA	NA	NA	NA	NA	21.3677	21.2099	15.4359	16.9781	NA	18.7475	NA	NA	NA	NA	17.2379	17.2615	NA	NA	NA	NA	31.9445	25.7223	NA	21.2957	23.0684
C3N-01213-T	Tumor	CCRCC	NA	NA	NA	NA	NA	NA	NA	NA	NA	NA	NA	NA	NA	NA	NA	NA	NA	NA	NA	NA	NA	NA	NA	NA	NA	NA	NA	NA	NA	NA	NA	NA	NA	NA	NA	NA	NA	NA	NA	NA	NA	NA	31.5516	23.8872	NA	NA	21.4766
C3N-01214-N	Normal	CCRCC	18.7863	17.2299	-0.831329	NA	NA	NA	NA	NA	NA	NA	NA	NA	NA	NA	NA	NA	NA	NA	NA	NA	16.3149	NA	NA	NA	NA	NA	18.1449	NA	NA	NA	NA	NA	NA	NA	NA	NA	NA	NA	NA	NA	NA	NA	30.5644	24.2214	NA	NA	19.6775
C3N-01214-T	Tumor	CCRCC	19.5314	16.7136	-1.39146	NA	NA	NA	NA	NA	NA	NA	NA	NA	NA	NA	NA	NA	NA	NA	NA	NA	15.4387	NA	NA	NA	NA	NA	17.9886	NA	NA	NA	NA	NA	NA	NA	NA	NA	NA	NA	NA	NA	NA	NA	31.4081	24.0024	NA	NA	21.549
C3N-01217-T	Tumor	UCEC	NA	18.5363	NA	NA	NA	17.966	NA	21.6454	NA	NA	NA	NA	NA	NA	NA	NA	NA	18.9249	NA	NA	19.3885	NA	NA	NA	15.9535	NA	20.7707	20.1694	15.2365	NA	NA	18.4767	NA	NA	NA	NA	16.8319	NA	NA	NA	NA	NA	32.6508	25.4953	NA	20.7027	NA
C3N-01219-T	Tumor	UCEC	20.4583	19.0788	0.919091	NA	NA	NA	NA	22.1708	NA	NA	NA	NA	NA	NA	NA	18.9671	14.9426	19.2639	NA	NA	20.2269	NA	NA	NA	NA	NA	20.3769	20.3796	NA	NA	NA	18.8072	NA	NA	NA	NA	17.7047	NA	17.9483	NA	NA	NA	31.8388	26.2804	NA	20.9507	21.2215
C3N-01220-N	Normal	CCRCC	NA	13.7323	NA	NA	NA	NA	NA	NA	NA	NA	NA	NA	NA	NA	NA	13.7323	NA	NA	NA	NA	NA	NA	NA	NA	NA	NA	NA	NA	NA	NA	NA	NA	NA	NA	NA	NA	NA	NA	NA	NA	NA	NA	30.3234	22.6845	NA	NA	20.5574
C3N-01220-T	Tumor	CCRCC	NA	14.7256	NA	NA	NA	NA	NA	NA	NA	NA	NA	NA	NA	NA	NA	14.7256	NA	NA	NA	NA	NA	NA	NA	NA	NA	NA	NA	NA	NA	NA	NA	NA	NA	NA	NA	NA	NA	NA	NA	NA	NA	NA	32.3265	23.6225	NA	NA	20.9646
C3N-01261-N	Normal	CCRCC	18.4243	16.4878	-1.55212	NA	NA	NA	NA	NA	NA	NA	NA	NA	NA	NA	NA	NA	NA	NA	NA	NA	15.7065	NA	NA	NA	NA	NA	17.269	NA	NA	NA	NA	NA	NA	NA	NA	NA	NA	NA	NA	NA	NA	NA	30.4743	23.5279	NA	NA	19.9823
C3N-01261-T	Tumor	CCRCC	18.5709	16.7656	-1.28294	NA	NA	NA	NA	NA	NA	NA	NA	NA	NA	NA	NA	NA	NA	NA	NA	NA	15.9563	NA	NA	NA	NA	NA	17.5748	NA	NA	NA	NA	NA	NA	NA	NA	NA	NA	NA	NA	NA	NA	NA	31.8579	24.0663	NA	NA	21.4536
C3N-01267-T	Tumor	UCEC	19.2254	18.9735	0.88644	NA	NA	17.8903	NA	21.481	NA	NA	NA	NA	17.8506	NA	NA	NA	NA	NA	NA	NA	NA	NA	NA	NA	NA	NA	19.511	21.1161	NA	NA	NA	18.3981	NA	NA	NA	NA	NA	16.5676	NA	NA	NA	NA	32.3906	25.0543	NA	20.5839	20.5013
C3N-01334-T	Tumor	GBM	NA	17.3981	NA	NA	NA	NA	NA	NA	NA	NA	NA	NA	NA	NA	NA	NA	NA	NA	NA	NA	NA	NA	NA	NA	NA	NA	NA	17.3981	NA	NA	NA	NA	NA	NA	NA	NA	NA	NA	NA	NA	NA	NA	33.2936	24.09	NA	NA	NA
C3N-01337-N	Normal	HNSCC	NA	16.6733	NA	NA	NA	NA	15.0308	19.6518	NA	NA	NA	NA	NA	NA	NA	NA	NA	NA	NA	NA	NA	14.9941	NA	16.0225	NA	NA	17.038	17.4955	NA	NA	NA	NA	NA	NA	NA	NA	NA	17.9022	NA	NA	NA	15.2517	32.0777	25.2832	NA	NA	20.4465
C3N-01337-T	Tumor	HNSCC	NA	17.4165	NA	NA	NA	NA	15.2314	20.6362	NA	NA	NA	NA	NA	NA	NA	NA	NA	NA	NA	NA	NA	16.3216	NA	16.7901	NA	NA	17.9046	18.4639	NA	NA	NA	NA	NA	NA	NA	NA	NA	17.9571	NA	NA	NA	16.0273	30.8202	25.6116	NA	NA	20.1314
C3N-01338-N	Normal	HNSCC	17.3519	18.0314	0.0546744	NA	NA	NA	NA	19.6483	NA	NA	NA	NA	NA	NA	NA	NA	NA	14.9763	NA	NA	NA	NA	NA	NA	17.8572	NA	20.6875	16.709	NA	NA	NA	NA	NA	NA	NA	NA	NA	NA	NA	20.9205	NA	15.421	32.1117	24.7804	NA	NA	20.2224
C3N-01338-T	Tumor	HNSCC	19.4314	18.9312	0.831976	NA	NA	NA	NA	21.0677	NA	NA	NA	NA	NA	NA	NA	NA	NA	15.1739	NA	NA	NA	NA	NA	NA	18.3959	NA	21.9084	18.7431	NA	NA	NA	NA	NA	NA	NA	NA	NA	NA	NA	20.5555	NA	16.674	31.0069	26.0934	NA	NA	22.3369
C3N-01339-T	Tumor	HNSCC	NA	18.8841	NA	NA	NA	NA	NA	20.9937	NA	NA	NA	NA	NA	NA	NA	NA	NA	NA	NA	NA	NA	NA	NA	NA	NA	NA	21.7246	18.6556	NA	NA	NA	18.4363	NA	NA	NA	NA	17.2743	NA	NA	NA	NA	16.2198	29.6406	26.5236	NA	NA	21.7595
C3N-01340-N	Normal	HNSCC	NA	17.5222	NA	NA	NA	NA	NA	NA	13.831	NA	NA	NA	NA	NA	NA	15.682	NA	NA	NA	NA	17.3479	NA	NA	NA	NA	NA	20.8905	NA	NA	NA	NA	NA	NA	NA	NA	NA	NA	NA	NA	19.8595	NA	NA	31.6554	25.1029	NA	NA	20.0506
C3N-01340-T	Tumor	HNSCC	NA	18.7167	NA	NA	NA	NA	NA	NA	15.3754	NA	NA	NA	NA	NA	NA	17.7985	NA	NA	NA	NA	19.1797	NA	NA	NA	NA	NA	21.798	NA	NA	NA	NA	NA	NA	NA	NA	NA	NA	NA	NA	19.4317	NA	NA	31.7931	25.3046	NA	NA	21.1291
C3N-01346-N	Normal	UCEC	NA	17.3654	NA	NA	NA	17.7535	NA	20.7925	NA	NA	15.9005	NA	17.1549	NA	NA	NA	NA	18.1687	13.3659	NA	NA	NA	NA	NA	NA	NA	20.7283	19.3951	NA	NA	NA	17.8793	NA	NA	NA	13.3127	16.5679	NA	NA	NA	NA	NA	33.1411	24.8298	NA	20.9542	20.4516
C3N-01346-T	Tumor	UCEC	NA	18.0774	NA	NA	NA	17.6872	NA	22.012	NA	NA	16.109	NA	18.5385	NA	NA	NA	NA	19.0269	13.3386	NA	NA	NA	NA	NA	NA	NA	21.7096	20.4774	NA	NA	NA	18.3333	NA	NA	NA	14.2929	17.3257	NA	NA	NA	NA	NA	31.7337	26.6171	NA	21.0596	19.8709
C3N-01349-T	Tumor	UCEC	21.9656	18.8466	0.598086	NA	14.2003	17.8636	NA	23.4263	NA	NA	NA	17.7714	19.6104	NA	NA	19.7768	16.5624	19.9145	NA	NA	NA	NA	NA	NA	NA	16.9189	20.9369	21.5448	NA	18.8981	NA	17.4651	NA	NA	NA	NA	NA	NA	18.9625	NA	NA	NA	31.4257	26.3557	NA	21.3578	19.368
C3N-01361-N	Normal	CCRCC	19.1052	15.5551	-2.52486	14.094	NA	NA	NA	NA	NA	NA	NA	NA	NA	NA	NA	12.9306	NA	NA	NA	NA	16.121	NA	NA	NA	NA	NA	17.4933	17.9571	NA	NA	NA	14.7349	NA	NA	NA	NA	NA	NA	NA	NA	NA	NA	30.1195	23.5503	NA	NA	21.2961
C3N-01361-T	Tumor	CCRCC	19.3289	16.1793	-1.91387	15.0012	NA	NA	NA	NA	NA	NA	NA	NA	NA	NA	NA	14.1243	NA	NA	NA	NA	16.2535	NA	NA	NA	NA	NA	18.5488	17.3989	NA	NA	NA	15.7491	NA	NA	NA	NA	NA	NA	NA	NA	NA	NA	31.6535	24.6193	NA	NA	21.6626
C3N-01364-T	Tumor	GBM	NA	17.7583	NA	NA	NA	NA	NA	NA	NA	NA	NA	NA	NA	NA	NA	NA	NA	14.5018	NA	NA	NA	NA	NA	NA	NA	NA	20.9462	17.8269	NA	NA	NA	NA	NA	NA	NA	NA	NA	NA	NA	NA	NA	NA	33.1915	24.2258	NA	NA	NA
C3N-01366-T	Tumor	GBM	NA	17.9298	NA	NA	13.8207	NA	NA	19.8289	NA	NA	NA	NA	NA	NA	NA	NA	NA	NA	NA	NA	NA	NA	NA	NA	NA	NA	19.6674	18.402	NA	NA	NA	NA	NA	NA	NA	NA	NA	NA	NA	NA	NA	NA	33.5361	25.3021	NA	NA	NA
C3N-01367-T	Tumor	GBM	18.3508	17.3536	-0.681923	NA	NA	NA	NA	19.5835	NA	NA	NA	NA	NA	NA	NA	19.1919	NA	14.8963	NA	NA	NA	17.9072	NA	NA	NA	16.9053	19.4161	18.2439	NA	NA	NA	14.1995	NA	NA	NA	NA	15.839	NA	NA	NA	NA	NA	33.2083	26.2753	NA	17.3429	NA
C3N-01368-T	Tumor	GBM	NA	19.4979	NA	NA	NA	NA	NA	NA	NA	NA	NA	NA	NA	NA	NA	NA	NA	NA	NA	NA	NA	NA	NA	NA	NA	NA	NA	19.4979	NA	NA	NA	NA	NA	NA	NA	NA	NA	NA	NA	NA	NA	NA	32.8569	25.548	NA	NA	NA
C3N-01369-T	Tumor	GBM	17.198	16.7596	-1.20808	NA	NA	NA	NA	NA	NA	15.015	NA	NA	NA	NA	NA	NA	NA	NA	NA	NA	NA	NA	NA	NA	NA	16.1356	17.3539	18.8002	NA	NA	NA	NA	NA	NA	NA	NA	NA	16.4931	NA	NA	NA	NA	32.7516	24.9106	NA	NA	19.7298
C3N-01375-T	Tumor	PDA	NA	18.1495	NA	NA	NA	NA	NA	NA	NA	NA	NA	NA	NA	NA	NA	18.1495	NA	NA	NA	NA	NA	NA	NA	NA	NA	NA	NA	NA	NA	NA	NA	NA	NA	NA	NA	NA	NA	NA	NA	NA	NA	NA	32.6039	24.1289	NA	NA	NA
C3N-01379-T	Tumor	PDA	NA	16.4842	NA	NA	NA	NA	NA	NA	NA	NA	NA	NA	NA	NA	NA	NA	NA	NA	NA	NA	16.4842	NA	NA	NA	NA	NA	NA	NA	NA	NA	NA	NA	NA	NA	NA	NA	NA	NA	NA	NA	NA	NA	31.1106	24.1379	NA	NA	17.803
C3N-01380-T	Tumor	PDA	NA	16.6384	NA	NA	NA	NA	NA	NA	NA	NA	NA	NA	NA	NA	NA	17.57	NA	NA	NA	NA	NA	NA	NA	NA	NA	NA	NA	15.7068	NA	NA	NA	NA	NA	NA	NA	NA	NA	NA	NA	NA	NA	NA	32.1404	24.5073	NA	NA	NA
C3N-01381-T	Tumor	PDA	NA	18.1694	NA	NA	NA	NA	NA	NA	NA	NA	NA	NA	NA	NA	NA	18.1694	NA	NA	NA	NA	NA	NA	NA	NA	NA	NA	NA	NA	NA	NA	NA	NA	NA	NA	NA	NA	NA	NA	NA	NA	NA	NA	30.9681	24.1143	NA	NA	NA
C3N-01382-T	Tumor	PDA	NA	16.9737	NA	NA	NA	NA	NA	NA	NA	NA	NA	NA	NA	NA	NA	17.4088	NA	NA	NA	NA	16.5387	NA	NA	NA	NA	NA	NA	NA	NA	NA	NA	NA	NA	NA	NA	NA	NA	NA	NA	NA	NA	NA	31.0975	24.4286	NA	NA	NA
C3N-01383-T	Tumor	PDA	NA	16.9214	NA	NA	NA	NA	NA	NA	NA	NA	NA	NA	NA	NA	NA	17.3519	NA	NA	NA	NA	16.491	NA	NA	NA	NA	NA	NA	NA	NA	NA	NA	NA	NA	NA	NA	NA	NA	NA	NA	NA	NA	NA	32.6051	23.9935	NA	NA	NA
C3N-01388-T	Tumor	PDA	NA	17.0057	NA	NA	NA	NA	NA	NA	NA	NA	NA	NA	NA	NA	NA	17.0057	NA	NA	NA	NA	NA	NA	NA	NA	NA	NA	NA	NA	NA	NA	NA	NA	NA	NA	NA	NA	NA	NA	NA	NA	NA	NA	31.8094	24.014	NA	NA	NA
C3N-01405-N	Normal	LUAD	20.6503	17.2477	-0.923354	NA	NA	NA	NA	NA	NA	NA	NA	NA	NA	NA	NA	NA	NA	15.6649	NA	NA	17.6268	NA	NA	NA	17.6656	NA	19.4175	15.8634	NA	NA	NA	NA	NA	NA	NA	NA	NA	NA	NA	NA	NA	NA	32.2801	24.6622	NA	NA	19.7671
C3N-01405-T	Tumor	LUAD	23.0591	18.5979	0.285046	NA	NA	NA	NA	NA	NA	NA	NA	NA	NA	NA	NA	NA	NA	17.1546	NA	NA	19.6792	NA	NA	NA	18.1578	NA	20.0634	17.9348	NA	NA	NA	NA	NA	NA	NA	NA	NA	NA	NA	NA	NA	NA	31.537	25.8346	NA	NA	19.431
C3N-01410-N	Normal	LUAD	20.0321	16.9324	-1.20222	NA	NA	NA	NA	NA	NA	NA	NA	NA	NA	NA	NA	NA	NA	NA	NA	NA	16.9324	NA	NA	NA	NA	NA	NA	NA	NA	NA	NA	NA	NA	NA	NA	NA	NA	NA	NA	NA	NA	NA	32.1129	24.5883	NA	NA	20.4081
C3N-01410-T	Tumor	LUAD	21.8744	20.427	2.18391	NA	NA	NA	NA	NA	NA	NA	NA	NA	NA	NA	NA	NA	NA	NA	NA	NA	20.427	NA	NA	NA	NA	NA	NA	NA	NA	NA	NA	NA	NA	NA	NA	NA	NA	NA	NA	NA	NA	NA	31.3324	25.6264	NA	NA	20.0164
C3N-01411-N	Normal	LSCC	19.7983	17.934	-0.186777	NA	NA	16.5961	NA	19.2148	NA	NA	NA	NA	NA	NA	NA	NA	NA	19.097	NA	NA	17.3826	NA	NA	NA	18.3939	NA	19.2285	18.3164	NA	NA	NA	17.4255	NA	NA	NA	NA	NA	NA	15.7514	NA	NA	NA	32.1269	25.1075	NA	NA	20.2121
C3N-01411-T	Tumor	LSCC	22.8642	19.8205	1.5191	NA	NA	16.9449	NA	21.8589	NA	NA	NA	NA	NA	NA	NA	21.5251	NA	20.5582	NA	NA	20.4522	NA	NA	NA	20.0425	NA	21.0822	20.4137	NA	NA	NA	18.82	NA	NA	NA	NA	NA	NA	16.5074	NA	NA	NA	30.9797	27.4795	NA	NA	20.0104
C3N-01413-N	Normal	LUAD	21.9967	16.7638	-1.48653	NA	NA	NA	NA	NA	NA	NA	NA	NA	NA	NA	NA	16.3267	NA	NA	NA	NA	17.2009	NA	NA	NA	NA	NA	NA	NA	NA	NA	NA	NA	NA	NA	NA	NA	NA	NA	NA	NA	NA	NA	32.2663	24.4234	NA	NA	19.8506
C3N-01413-T	Tumor	LUAD	22.013	20.9064	2.65515	NA	NA	NA	NA	NA	NA	NA	NA	NA	NA	NA	NA	21.0206	NA	NA	NA	NA	20.7922	NA	NA	NA	NA	NA	NA	NA	NA	NA	NA	NA	NA	NA	NA	NA	NA	NA	NA	NA	NA	NA	31.9353	25.3485	NA	NA	19.4935
C3N-01414-N	Normal	LUAD	22.5066	16.2451	-2.03529	NA	NA	NA	NA	NA	NA	NA	NA	NA	NA	NA	NA	NA	NA	NA	NA	NA	16.8636	NA	NA	NA	NA	NA	18.7012	NA	NA	NA	NA	NA	NA	NA	NA	NA	NA	13.1704	NA	NA	NA	NA	32.1031	24.6159	NA	NA	20.3428
C3N-01414-T	Tumor	LUAD	22.0575	17.7704	-0.483475	NA	NA	NA	NA	NA	NA	NA	NA	NA	NA	NA	NA	19.5405	NA	NA	NA	NA	19.2114	NA	NA	NA	NA	NA	19.3592	NA	NA	NA	NA	NA	NA	NA	NA	NA	NA	12.9705	NA	NA	NA	NA	31.6332	25.0117	NA	NA	19.7264
C3N-01415-N	Normal	LUAD	21.5559	17.2376	-0.98674	NA	NA	16.0265	NA	NA	NA	NA	NA	NA	NA	NA	NA	NA	NA	NA	NA	NA	17.2796	NA	NA	NA	18.0147	NA	18.7019	16.1653	NA	NA	NA	NA	NA	NA	NA	NA	NA	NA	NA	NA	NA	NA	32.212	24.6174	NA	NA	NA
C3N-01415-T	Tumor	LUAD	22.0043	18.2395	-0.011308	NA	NA	15.795	NA	NA	NA	NA	NA	NA	NA	NA	NA	19.1575	NA	NA	NA	NA	18.8186	NA	NA	NA	17.9139	NA	20.259	17.4927	NA	NA	NA	NA	NA	NA	NA	NA	NA	NA	NA	NA	NA	NA	31.6199	25.9146	NA	NA	NA
C3N-01416-N	Normal	LUAD	21.8403	16.1765	-2.06464	14.959	NA	NA	NA	NA	NA	NA	NA	NA	NA	NA	NA	15.4506	NA	15.6982	NA	NA	17.2325	NA	NA	NA	17.5419	NA	NA	NA	NA	NA	NA	NA	NA	NA	NA	NA	NA	NA	NA	NA	NA	NA	32.3423	24.6434	NA	NA	20.2843
C3N-01416-T	Tumor	LUAD	22.4449	17.9812	-0.295474	16.8742	NA	NA	NA	NA	NA	NA	NA	NA	NA	NA	NA	19.2415	NA	16.3057	NA	NA	19.4264	NA	NA	NA	18.0583	NA	NA	NA	NA	NA	NA	NA	NA	NA	NA	NA	NA	NA	NA	NA	NA	NA	32.104	26.14	NA	NA	19.726
C3N-01488-N	Normal	LUAD	21.5993	NA	NA	NA	NA	NA	NA	NA	NA	NA	NA	NA	NA	NA	NA	NA	NA	NA	NA	NA	NA	NA	NA	NA	NA	NA	NA	NA	NA	NA	NA	NA	NA	NA	NA	NA	NA	NA	NA	NA	NA	NA	32.2825	24.4497	NA	NA	20.1846
C3N-01488-T	Tumor	LUAD	22.2611	19.3027	1.03677	NA	NA	NA	NA	NA	NA	NA	NA	NA	NA	NA	NA	19.2958	NA	NA	NA	NA	19.3095	NA	NA	NA	NA	NA	NA	NA	NA	NA	NA	NA	NA	NA	NA	NA	NA	NA	NA	NA	NA	NA	31.9058	25.6637	NA	NA	20.5361
C3N-01489-N	Normal	LUAD	20.8731	17.0287	-1.15539	NA	NA	NA	NA	NA	NA	NA	NA	NA	NA	NA	NA	NA	NA	15.6746	NA	NA	NA	NA	NA	NA	18.0009	NA	18.2827	16.1568	NA	NA	NA	NA	NA	NA	NA	NA	NA	NA	NA	NA	NA	NA	32.05	24.8079	NA	NA	19.8136
C3N-01489-T	Tumor	LUAD	22.4809	18.0279	-0.250919	NA	NA	NA	NA	NA	NA	NA	NA	NA	NA	NA	NA	NA	NA	16.5839	NA	NA	18.5963	NA	NA	NA	17.9829	NA	19.4287	17.5477	NA	NA	NA	NA	NA	NA	NA	NA	NA	NA	NA	NA	NA	NA	31.8255	25.3607	NA	NA	19.8111
C3N-01502-T	Tumor	PDA	NA	16.4281	NA	NA	NA	NA	NA	NA	NA	NA	NA	NA	NA	NA	NA	17.0776	NA	NA	NA	NA	NA	NA	NA	NA	NA	NA	NA	15.7787	NA	NA	NA	NA	NA	NA	NA	NA	NA	NA	NA	NA	NA	NA	32.0923	23.6783	NA	NA	NA
C3N-01505-T	Tumor	GBM	18.756	17.1978	-0.861664	NA	NA	NA	NA	NA	NA	NA	NA	NA	14.7173	NA	NA	NA	NA	NA	NA	NA	NA	NA	NA	NA	NA	16.3804	19.7049	17.9885	NA	NA	NA	NA	NA	NA	NA	NA	NA	NA	NA	NA	NA	NA	33.042	25.2231	NA	NA	19.9262
C3N-01510-T	Tumor	UCEC	20.382	17.344	-0.811247	NA	13.5957	18.0519	NA	22.1884	NA	NA	NA	16.6809	18.6815	NA	NA	18.3306	14.4843	19.2023	NA	NA	NA	NA	NA	NA	NA	12.773	19.9649	20.3453	NA	17.4997	NA	13.3344	NA	NA	NA	NA	NA	NA	17.6825	NA	NA	NA	31.7009	26.5764	NA	21.2447	21.0066
C3N-01515-T	Tumor	GBM	NA	18.802	NA	NA	NA	NA	NA	NA	NA	NA	NA	NA	NA	NA	NA	18.6658	NA	NA	NA	NA	19.4777	NA	NA	NA	NA	NA	19.1713	17.8933	NA	NA	NA	NA	NA	NA	NA	NA	NA	NA	NA	NA	NA	NA	33.1108	24.9902	NA	NA	NA
C3N-01517-T	Tumor	GBM	18.6564	18.666	0.612435	NA	NA	NA	NA	19.8445	NA	NA	NA	NA	NA	NA	NA	19.1887	NA	NA	NA	NA	19.1728	NA	NA	NA	NA	16.2482	21.5734	NA	NA	NA	NA	NA	NA	NA	NA	NA	NA	15.9686	NA	NA	NA	NA	32.7269	25.607	NA	NA	NA
C3N-01518-T	Tumor	GBM	18.7956	18.3219	0.260137	NA	NA	NA	NA	NA	NA	NA	NA	NA	NA	NA	NA	NA	NA	NA	NA	NA	20.4271	NA	NA	NA	NA	16.0189	20.7015	17.9913	NA	NA	NA	NA	NA	NA	NA	NA	NA	16.4706	NA	NA	NA	NA	32.8188	25.8241	NA	16.7805	NA
C3N-01520-T	Tumor	UCEC	20.2331	19.2492	1.10274	NA	NA	NA	NA	21.9795	NA	NA	NA	NA	NA	NA	NA	19.2245	16.2436	19.1826	NA	NA	21.0365	NA	NA	NA	NA	NA	19.9731	20.4724	NA	NA	NA	18.7023	NA	NA	NA	NA	17.5332	NA	18.1441	NA	NA	NA	31.9881	26.1251	NA	21.0989	20.6859
C3N-01521-T	Tumor	UCEC	19.4323	16.9889	-1.11036	NA	13.6197	17.6263	NA	21.4462	NA	NA	NA	16.7919	17.8993	NA	NA	18.4615	14.7208	18.5462	NA	NA	NA	NA	NA	NA	NA	12.8796	19.1864	19.6074	NA	16.7339	NA	13.2311	NA	NA	NA	NA	NA	NA	17.0945	NA	NA	NA	31.1466	25.7517	NA	20.2857	20.9724
C3N-01522-N	Normal	CCRCC	NA	13.8006	NA	NA	NA	NA	NA	NA	NA	NA	NA	NA	NA	NA	NA	13.8006	NA	NA	NA	NA	NA	NA	NA	NA	NA	NA	NA	NA	NA	NA	NA	NA	NA	NA	NA	NA	NA	NA	NA	NA	NA	NA	30.3635	22.9824	NA	NA	21.1438
C3N-01522-T	Tumor	CCRCC	NA	14.2075	NA	NA	NA	NA	NA	NA	NA	NA	NA	NA	NA	NA	NA	14.2075	NA	NA	NA	NA	NA	NA	NA	NA	NA	NA	NA	NA	NA	NA	NA	NA	NA	NA	NA	NA	NA	NA	NA	NA	NA	NA	31.3742	25.2319	NA	NA	22.0569
C3N-01524-N	Normal	CCRCC	NA	NA	NA	NA	NA	NA	NA	NA	NA	NA	NA	NA	NA	NA	NA	NA	NA	NA	NA	NA	NA	NA	NA	NA	NA	NA	NA	NA	NA	NA	NA	NA	NA	NA	NA	NA	NA	NA	NA	NA	NA	NA	31.3307	23.3371	NA	NA	21.2056
C3N-01524-T	Tumor	CCRCC	NA	NA	NA	NA	NA	NA	NA	NA	NA	NA	NA	NA	NA	NA	NA	NA	NA	NA	NA	NA	NA	NA	NA	NA	NA	NA	NA	NA	NA	NA	NA	NA	NA	NA	NA	NA	NA	NA	NA	NA	NA	NA	31.2618	23.972	NA	NA	21.9486
C3N-01537-T	Tumor	UCEC	NA	17.5593	NA	NA	NA	18.2051	NA	21.5502	NA	NA	15.6561	NA	17.2224	NA	NA	NA	NA	17.8613	12.2648	NA	NA	NA	NA	NA	NA	NA	21.1488	20.0245	NA	NA	NA	18.5281	NA	NA	NA	13.7059	16.9846	NA	NA	NA	NA	NA	31.5175	26.1509	NA	21.8825	20.3921
C3N-01620-N	Normal	HNSCC	NA	18.9162	NA	NA	NA	NA	NA	20.0985	NA	NA	NA	NA	NA	NA	NA	NA	NA	NA	NA	NA	18.0892	NA	NA	NA	NA	NA	20.8703	NA	NA	NA	NA	NA	NA	NA	NA	NA	16.6069	NA	NA	NA	NA	NA	31.9487	25.3632	NA	NA	20.8387
C3N-01620-T	Tumor	HNSCC	NA	19.7883	NA	NA	NA	NA	NA	20.7986	NA	NA	NA	NA	NA	NA	NA	NA	NA	NA	NA	NA	19.1248	NA	NA	NA	NA	NA	21.7166	NA	NA	NA	NA	NA	NA	NA	NA	NA	17.513	NA	NA	NA	NA	NA	31.2302	25.3757	NA	NA	20.741
C3N-01645-N	Normal	HNSCC	17.9617	18.297	0.284371	NA	NA	NA	NA	20.1166	NA	NA	NA	NA	NA	NA	NA	NA	NA	14.9401	NA	NA	NA	NA	NA	NA	17.8509	NA	20.6776	17.5553	NA	NA	NA	NA	NA	NA	NA	NA	NA	NA	NA	21.5034	NA	15.4354	32.0579	25.2064	NA	NA	19.9663
C3N-01645-T	Tumor	HNSCC	19.7081	18.9295	0.813955	NA	NA	NA	NA	21.3365	NA	NA	NA	NA	NA	NA	NA	NA	NA	15.565	NA	NA	NA	NA	NA	NA	18.2685	NA	22.2128	19.4623	NA	NA	NA	NA	NA	NA	NA	NA	NA	NA	NA	19.2164	NA	16.4447	31.1235	25.3998	NA	NA	20.8546
C3N-01646-N	Normal	CCRCC	NA	NA	NA	NA	NA	NA	NA	NA	NA	NA	NA	NA	NA	NA	NA	NA	NA	NA	NA	NA	NA	NA	NA	NA	NA	NA	NA	NA	NA	NA	NA	NA	NA	NA	NA	NA	NA	NA	NA	NA	NA	NA	30.4824	23.1594	NA	NA	20.5164
C3N-01646-T	Tumor	CCRCC	NA	NA	NA	NA	NA	NA	NA	NA	NA	NA	NA	NA	NA	NA	NA	NA	NA	NA	NA	NA	NA	NA	NA	NA	NA	NA	NA	NA	NA	NA	NA	NA	NA	NA	NA	NA	NA	NA	NA	NA	NA	NA	31.3189	24.2297	NA	NA	21.5453
C3N-01648-N	Normal	CCRCC	NA	NA	NA	NA	NA	NA	NA	NA	NA	NA	NA	NA	NA	NA	NA	NA	NA	NA	NA	NA	NA	NA	NA	NA	NA	NA	NA	NA	NA	NA	NA	NA	NA	NA	NA	NA	NA	NA	NA	NA	NA	NA	30.7159	22.9733	NA	NA	NA
C3N-01648-T	Tumor	CCRCC	NA	NA	NA	NA	NA	NA	NA	NA	NA	NA	NA	NA	NA	NA	NA	NA	NA	NA	NA	NA	NA	NA	NA	NA	NA	NA	NA	NA	NA	NA	NA	NA	NA	NA	NA	NA	NA	NA	NA	NA	NA	NA	32.4727	23.2784	NA	NA	NA
C3N-01649-N	Normal	CCRCC	18.1037	15.6352	-2.38578	NA	NA	NA	NA	NA	14.2392	NA	NA	NA	NA	NA	NA	NA	NA	NA	NA	NA	NA	NA	NA	NA	NA	NA	17.317	17.1135	NA	NA	NA	13.8712	NA	NA	NA	NA	NA	NA	NA	NA	NA	NA	30.2102	23.2716	NA	NA	20.3098
C3N-01649-T	Tumor	CCRCC	18.2384	15.9684	-2.06051	NA	NA	NA	NA	NA	14.3919	NA	NA	NA	NA	NA	NA	NA	NA	NA	NA	NA	NA	NA	NA	NA	NA	NA	17.4936	17.1265	NA	NA	NA	14.8617	NA	NA	NA	NA	NA	NA	NA	NA	NA	NA	31.9298	23.9336	NA	NA	21.7226
C3N-01651-N	Normal	CCRCC	18.1762	15.2603	-2.76493	13.4988	NA	NA	NA	NA	NA	NA	NA	NA	NA	NA	NA	12.8545	NA	NA	NA	NA	15.9292	NA	NA	NA	NA	NA	17.4764	18.0247	NA	NA	NA	13.7785	NA	NA	NA	NA	NA	NA	NA	NA	NA	NA	30.364	23.5583	NA	NA	21.0482
C3N-01651-T	Tumor	CCRCC	18.7682	16.0653	-1.99489	14.2559	NA	NA	NA	NA	NA	NA	NA	NA	NA	NA	NA	15.54	NA	NA	NA	NA	16.4825	NA	NA	NA	NA	NA	17.8782	17.2291	NA	NA	NA	15.0059	NA	NA	NA	NA	NA	NA	NA	NA	NA	NA	31.208	24.8574	NA	NA	22.0294
C3N-01714-T	Tumor	PDA	NA	16.6982	NA	NA	NA	NA	NA	NA	NA	NA	NA	NA	NA	NA	NA	17.5192	NA	NA	NA	NA	NA	NA	NA	NA	NA	NA	NA	15.8772	NA	NA	NA	NA	NA	NA	NA	NA	NA	NA	NA	NA	NA	NA	32.2368	23.9713	NA	NA	NA
C3N-01715-T	Tumor	PDA	20.0257	17.2323	-0.901884	17.0586	NA	NA	NA	19.5253	NA	NA	NA	NA	NA	NA	NA	20.0214	NA	NA	NA	NA	18.398	NA	NA	NA	NA	NA	19.8509	14.2394	NA	14.7898	NA	NA	NA	NA	NA	NA	NA	13.9752	NA	NA	NA	NA	32.1488	25.4404	NA	NA	17.9942
C3N-01716-T	Tumor	PDA	18.1926	19.3564	1.33012	NA	NA	NA	NA	19.3564	NA	NA	NA	NA	NA	NA	NA	NA	NA	NA	NA	NA	NA	NA	NA	NA	NA	NA	NA	NA	NA	NA	NA	NA	NA	NA	NA	NA	NA	NA	NA	NA	NA	NA	31.8149	24.1644	NA	NA	NA
C3N-01719-T	Tumor	PDA	NA	17.7197	NA	NA	NA	NA	NA	18.3662	NA	NA	NA	NA	NA	NA	NA	17.8185	NA	NA	NA	NA	16.9743	NA	NA	NA	NA	NA	NA	NA	NA	NA	NA	NA	NA	NA	NA	NA	NA	NA	NA	NA	NA	NA	32.4365	23.8239	NA	NA	NA
C3N-01752-T	Tumor	HNSCC	20.4878	18.9102	0.748784	NA	NA	15.3725	NA	21.8712	NA	NA	NA	NA	NA	NA	NA	18.9104	NA	NA	NA	NA	NA	NA	NA	17.2287	NA	NA	22.1693	19.4449	NA	NA	NA	NA	NA	NA	NA	NA	NA	NA	NA	NA	NA	17.3746	30.6926	26.1504	NA	NA	NA
C3N-01754-N	Normal	HNSCC	NA	18.0843	NA	NA	NA	NA	NA	NA	13.9666	NA	NA	NA	NA	NA	NA	16.2758	NA	NA	NA	NA	17.7791	NA	NA	NA	NA	NA	21.2992	NA	NA	NA	NA	NA	NA	NA	NA	NA	NA	NA	NA	21.1006	NA	NA	31.9543	25.3533	NA	NA	20.7657
C3N-01754-T	Tumor	HNSCC	NA	19.0496	NA	NA	NA	NA	NA	NA	15.1978	NA	NA	NA	NA	NA	NA	18.3956	NA	NA	NA	NA	19.5609	NA	NA	NA	NA	NA	21.893	NA	NA	NA	NA	NA	NA	NA	NA	NA	NA	NA	NA	20.2009	NA	NA	31.1896	25.8598	NA	NA	20.7728
C3N-01755-T	Tumor	HNSCC	20.1247	18.538	0.397996	NA	NA	NA	NA	20.8454	NA	NA	NA	NA	NA	NA	NA	16.7549	NA	NA	NA	NA	NA	NA	NA	NA	17.9704	NA	21.4774	19.1168	NA	NA	NA	17.8986	NA	NA	NA	NA	NA	NA	NA	NA	NA	15.7028	31.0931	26.1058	NA	NA	21.8317
C3N-01756-N	Normal	HNSCC	18.7411	17.4339	-0.624614	NA	14.9627	NA	14.7446	19.5589	NA	NA	NA	NA	NA	NA	NA	NA	NA	NA	NA	NA	16.6708	NA	NA	NA	17.966	NA	20.7676	17.947	NA	NA	NA	18.6022	NA	NA	NA	NA	16.9158	17.6631	NA	NA	NA	15.9747	31.6659	25.1981	NA	NA	20.4786
C3N-01756-T	Tumor	HNSCC	20.0505	18.1283	-0.00738765	NA	14.9846	NA	15.3191	20.9877	NA	NA	NA	NA	NA	NA	NA	NA	NA	NA	NA	NA	19.1396	NA	NA	NA	18.4783	NA	21.6688	18.2177	NA	NA	NA	18.8037	NA	NA	NA	NA	16.9854	17.8853	NA	NA	NA	16.9411	31.0358	26.6716	NA	NA	22.0287
C3N-01757-T	Tumor	HNSCC	19.57	17.9897	-0.11772	NA	NA	NA	NA	NA	NA	NA	NA	NA	NA	NA	NA	17.4619	NA	15.0237	NA	NA	18.8673	NA	NA	NA	NA	NA	20.7841	18.4091	NA	NA	NA	18.6679	NA	NA	NA	NA	16.5758	17.7197	NA	19.8611	NA	16.5258	31.0279	25.93	NA	NA	20.0661
C3N-01758-N	Normal	HNSCC	NA	18.4625	NA	NA	NA	NA	NA	19.5307	NA	NA	NA	NA	NA	NA	NA	NA	NA	NA	NA	NA	NA	NA	NA	NA	NA	NA	21.1521	18.2208	NA	NA	NA	19.1125	NA	NA	NA	NA	16.9514	NA	NA	NA	NA	15.8078	32.2829	24.8739	NA	NA	19.9848
C3N-01758-T	Tumor	HNSCC	NA	18.6072	NA	NA	NA	NA	NA	20.781	NA	NA	NA	NA	NA	NA	NA	NA	NA	NA	NA	NA	NA	NA	NA	NA	NA	NA	20.9797	18.2757	NA	NA	NA	19.1268	NA	NA	NA	NA	16.6333	NA	NA	NA	NA	15.8468	31.28	25.2665	NA	NA	20.2103
C3N-01798-T	Tumor	GBM	NA	18.4727	NA	NA	NA	NA	NA	NA	NA	NA	NA	NA	NA	NA	NA	NA	NA	15.5067	NA	NA	NA	NA	NA	NA	NA	NA	21.5733	18.338	NA	NA	NA	NA	NA	NA	NA	NA	NA	NA	NA	NA	NA	NA	32.3708	25.6344	NA	NA	NA
C3N-01799-N	Normal	LUAD	23.1105	16.8488	-1.46716	NA	NA	NA	NA	NA	NA	NA	NA	NA	NA	NA	NA	16.0154	NA	NA	NA	NA	16.9133	NA	NA	NA	17.6175	NA	NA	NA	NA	NA	NA	NA	NA	NA	NA	NA	NA	NA	NA	NA	NA	NA	32.1793	24.3734	NA	NA	20.1708
C3N-01799-T	Tumor	LUAD	21.818	18.2988	0.0590113	NA	NA	NA	NA	NA	NA	NA	NA	NA	NA	NA	NA	18.9346	NA	NA	NA	NA	18.3984	NA	NA	NA	17.5633	NA	NA	NA	NA	NA	NA	NA	NA	NA	NA	NA	NA	NA	NA	NA	NA	NA	31.6538	25.3043	NA	NA	20.3795
C3N-01802-T	Tumor	UCEC	NA	18.0606	NA	NA	NA	17.7203	NA	22.1875	NA	NA	NA	16.6323	NA	NA	NA	18.3324	14.5457	18.5986	NA	NA	NA	NA	NA	NA	NA	NA	19.8797	20.2622	NA	17.3485	NA	16.5012	NA	NA	NA	NA	17.295	NA	17.4238	NA	NA	NA	31.4244	25.4001	NA	23.0016	20.6064
C3N-01808-N	Normal	CCRCC	18.3124	16.0649	-1.96844	NA	NA	NA	NA	NA	14.3046	NA	NA	NA	NA	NA	NA	NA	NA	NA	NA	NA	NA	NA	NA	NA	NA	NA	17.5436	17.6423	NA	NA	NA	14.769	NA	NA	NA	NA	NA	NA	NA	NA	NA	NA	30.2154	23.4113	NA	NA	20.8851
C3N-01808-T	Tumor	CCRCC	18.2406	16.2386	-1.79049	NA	NA	NA	NA	NA	14.6274	NA	NA	NA	NA	NA	NA	NA	NA	NA	NA	NA	NA	NA	NA	NA	NA	NA	17.9103	17.4918	NA	NA	NA	14.9248	NA	NA	NA	NA	NA	NA	NA	NA	NA	NA	31.7484	24.2717	NA	NA	21.6488
C3N-01814-T	Tumor	GBM	19.6481	17.7814	-0.330585	NA	NA	NA	NA	NA	NA	NA	NA	NA	14.5596	NA	NA	NA	NA	NA	NA	NA	NA	NA	NA	NA	NA	17.0242	20.3141	19.2276	NA	NA	NA	NA	NA	NA	NA	NA	NA	NA	NA	NA	NA	NA	32.195	26.1063	NA	NA	18.9689
C3N-01815-T	Tumor	GBM	18.6804	18.1436	0.088621	NA	NA	NA	NA	NA	NA	NA	NA	NA	NA	NA	NA	NA	NA	NA	NA	NA	19.7655	NA	NA	NA	NA	16.2389	20.4354	18.0024	NA	NA	NA	NA	NA	NA	NA	NA	NA	16.2759	NA	NA	NA	NA	32.8826	25.6604	NA	16.7129	NA
C3N-01816-T	Tumor	GBM	17.8875	16.936	-1.07231	NA	NA	NA	NA	NA	NA	14.7747	NA	NA	NA	NA	NA	19.1607	NA	NA	NA	NA	NA	NA	NA	NA	NA	16.1581	17.5864	18.0565	NA	NA	NA	NA	NA	NA	NA	NA	NA	15.8794	NA	NA	NA	NA	33.0771	25.1433	NA	NA	18.9267
C3N-01818-T	Tumor	GBM	18.7228	17.169	-0.888462	NA	NA	NA	NA	NA	NA	NA	NA	NA	NA	NA	NA	NA	NA	NA	NA	NA	NA	NA	NA	NA	NA	NA	20.3152	18.6276	NA	NA	13.5596	NA	NA	NA	NA	NA	NA	16.1736	NA	NA	NA	NA	32.2067	25.8637	NA	NA	19.7199
C3N-01823-N	Normal	LUAD	NA	17.7802	NA	NA	NA	NA	NA	NA	NA	NA	NA	NA	NA	NA	NA	NA	NA	NA	NA	NA	17.7802	NA	NA	NA	NA	NA	NA	NA	NA	NA	NA	NA	NA	NA	NA	NA	NA	NA	NA	NA	NA	NA	32.4478	24.4539	NA	NA	20.0012
C3N-01823-T	Tumor	LUAD	NA	20.1817	NA	NA	NA	NA	NA	NA	NA	NA	NA	NA	NA	NA	NA	NA	NA	NA	NA	NA	20.1817	NA	NA	NA	NA	NA	NA	NA	NA	NA	NA	NA	NA	NA	NA	NA	NA	NA	NA	NA	NA	NA	31.6757	25.7352	NA	NA	20.1666
C3N-01825-T	Tumor	UCEC	19.9358	19.2891	1.16019	NA	NA	17.8255	NA	21.9614	NA	NA	NA	NA	18.1486	NA	NA	NA	NA	NA	NA	NA	NA	NA	NA	NA	NA	NA	19.8202	21.2516	NA	NA	NA	18.6974	NA	NA	NA	NA	NA	17.319	NA	NA	NA	NA	32.2814	26.3037	NA	20.8583	20.4384
C3N-01842-T	Tumor	LUAD	22.2913	17.3905	-0.877135	NA	NA	NA	NA	NA	NA	NA	NA	NA	NA	NA	NA	19.6858	NA	NA	NA	NA	19.7637	NA	NA	NA	NA	NA	NA	NA	NA	NA	NA	NA	NA	NA	NA	NA	12.722	NA	NA	NA	NA	NA	31.5215	26.6564	NA	NA	19.4346
C3N-01846-N	Normal	LSCC	20.4413	17.995	-0.163707	NA	18.3257	NA	NA	19.2525	NA	NA	NA	NA	NA	NA	NA	NA	NA	NA	NA	NA	17.6265	NA	NA	NA	18.3188	NA	NA	18.3053	NA	NA	NA	17.2511	NA	NA	NA	NA	16.885	NA	NA	NA	NA	NA	31.9896	25.4294	15.9319	19.0983	20.8745
C3N-01846-T	Tumor	LSCC	21.9104	19.0861	0.840856	NA	17.3574	NA	NA	20.9933	NA	NA	NA	NA	NA	NA	NA	NA	NA	NA	NA	NA	19.6179	NA	NA	NA	19.0193	NA	NA	20.1084	NA	NA	NA	18.0195	NA	NA	NA	NA	18.4868	NA	NA	NA	NA	NA	30.9633	26.3614	15.3063	18.8048	19.6013
C3N-01851-T	Tumor	GBM	17.8174	16.9949	-1.00923	NA	NA	NA	NA	NA	NA	14.8249	NA	NA	NA	NA	NA	18.9416	NA	NA	NA	NA	NA	NA	NA	NA	NA	15.9657	17.6854	17.4882	NA	NA	NA	NA	NA	NA	NA	NA	NA	17.0637	NA	NA	NA	NA	34.1055	24.9796	NA	NA	20.914
C3N-01852-T	Tumor	GBM	NA	19.0127	NA	NA	NA	NA	NA	NA	NA	NA	NA	NA	NA	NA	NA	NA	NA	NA	NA	NA	NA	NA	NA	NA	NA	NA	NA	19.0127	NA	NA	NA	NA	NA	NA	NA	NA	NA	NA	NA	NA	NA	NA	33.2698	25.1617	NA	NA	NA
C3N-01856-T	Tumor	GBM	18.6714	18.0818	0.0273973	NA	NA	NA	NA	NA	NA	NA	NA	NA	NA	NA	NA	NA	NA	NA	NA	NA	18.856	NA	NA	NA	NA	15.5879	21.3235	18.1108	NA	NA	NA	NA	NA	NA	NA	NA	NA	16.531	NA	NA	NA	NA	32.3757	25.7362	NA	16.5593	NA
C3N-01857-T	Tumor	GBM	18.3963	18.0005	-0.0377864	NA	NA	NA	NA	NA	NA	NA	NA	NA	NA	NA	NA	NA	NA	NA	NA	NA	19.154	NA	NA	NA	NA	15.5725	20.6707	18.2714	NA	NA	NA	NA	NA	NA	NA	NA	NA	16.3337	NA	NA	NA	NA	31.6488	24.797	NA	16.6779	NA
C3N-01858-N	Normal	HNSCC	18.748	16.9045	-1.15448	NA	14.8011	NA	NA	19.4056	NA	NA	NA	NA	NA	NA	NA	NA	NA	NA	NA	NA	NA	NA	NA	NA	18.0862	NA	17.0366	17.9123	NA	NA	NA	18.293	13.6339	NA	NA	NA	16.8662	17.2994	16.527	NA	NA	16.0879	32.2589	25.4286	NA	11.1523	NA
C3N-01858-T	Tumor	HNSCC	19.5973	17.4437	-0.665306	NA	15.2277	NA	NA	21.2978	NA	NA	NA	NA	NA	NA	NA	NA	NA	NA	NA	NA	NA	NA	NA	NA	18.0287	NA	18.2139	18.6151	NA	NA	NA	18.9566	13.6193	NA	NA	NA	16.66	17.4854	16.8114	NA	NA	16.9646	31.2039	26.0152	NA	12.0137	NA
C3N-01859-N	Normal	HNSCC	NA	17.2933	NA	14.3298	NA	14.9085	NA	19.7182	NA	NA	NA	NA	NA	NA	NA	NA	NA	NA	NA	NA	NA	NA	NA	NA	17.8981	NA	20.7688	17.5742	NA	NA	NA	19.0199	NA	NA	NA	NA	16.6707	17.2749	NA	NA	NA	14.77	31.8249	24.8806	NA	NA	20.37
C3N-01859-T	Tumor	HNSCC	NA	18.299	NA	16.8445	NA	14.6021	NA	21.4303	NA	NA	NA	NA	NA	NA	NA	NA	NA	NA	NA	NA	NA	NA	NA	NA	18.2923	NA	21.9626	19.0983	NA	NA	NA	18.7636	NA	NA	NA	NA	17.3931	18.8903	NA	NA	NA	15.7127	31.2618	25.9142	NA	NA	19.4398
C3N-01892-N	Normal	LSCC	20.5601	16.59	-1.57572	NA	17.0042	16.4645	NA	19.4915	NA	NA	NA	NA	NA	12.3666	NA	NA	NA	NA	NA	NA	17.7006	NA	NA	NA	18.3188	NA	16.8281	18.6299	NA	NA	NA	NA	NA	NA	NA	NA	17.1629	NA	14.7528	NA	13.7698	NA	32.2461	25.3469	NA	18.1216	20.5632
C3N-01892-T	Tumor	LSCC	21.8043	17.6466	-0.592348	NA	17.4046	16.5147	NA	20.9184	NA	NA	NA	NA	NA	13.8523	NA	NA	NA	NA	NA	NA	18.7622	NA	NA	NA	19.0265	NA	18.3708	19.9396	NA	NA	NA	NA	NA	NA	NA	NA	18.3126	NA	16.0029	NA	15.0084	NA	31.3408	26.4363	NA	18.4012	20.1012
C3N-01893-N	Normal	LSCC	20.5131	18.1778	0.014867	NA	16.6257	NA	NA	20.288	NA	NA	NA	NA	NA	NA	NA	18.5501	NA	NA	NA	NA	17.7816	NA	NA	NA	18.1013	NA	19.1416	18.5068	NA	NA	NA	17.7278	NA	NA	NA	NA	16.8772	NA	NA	NA	NA	NA	32.4456	25.4545	NA	18.2288	20.6859
C3N-01893-T	Tumor	LSCC	21.9067	19.6857	1.44064	NA	16.4626	NA	NA	21.4196	NA	NA	NA	NA	NA	NA	NA	21.5488	NA	NA	NA	NA	20.8893	NA	NA	NA	20.0735	NA	20.6034	20.1455	NA	NA	NA	17.8162	NA	NA	NA	NA	18.2119	NA	NA	NA	NA	NA	31.1878	26.1454	NA	18.7764	20.3149
C3N-01900-N	Normal	PDA	NA	16.9431	NA	NA	NA	NA	NA	NA	NA	NA	NA	NA	NA	NA	NA	17.5426	NA	17.0061	NA	NA	NA	NA	NA	NA	NA	NA	19.1211	NA	NA	NA	NA	17.0921	NA	NA	NA	NA	NA	13.9539	NA	NA	NA	NA	31.334	24.6234	NA	NA	NA
C3N-01900-T	Tumor	PDA	NA	16.4316	NA	NA	NA	NA	NA	NA	NA	NA	NA	NA	NA	NA	NA	17.4543	NA	15.8635	NA	NA	NA	NA	NA	NA	NA	NA	18.8038	NA	NA	NA	NA	16.2563	NA	NA	NA	NA	NA	13.7803	NA	NA	NA	NA	32.0909	24.0887	NA	NA	NA
C3N-01907-T	Tumor	PDA	NA	19.1051	NA	NA	NA	NA	NA	NA	NA	NA	NA	NA	NA	NA	NA	17.7133	NA	NA	NA	NA	NA	NA	NA	NA	NA	NA	NA	NA	NA	NA	NA	NA	NA	NA	NA	NA	NA	NA	NA	20.4969	NA	NA	32.1743	23.6781	NA	NA	NA
C3N-01943-N	Normal	HNSCC	18.0941	17.9807	-0.0397608	NA	NA	NA	NA	19.8441	NA	NA	NA	NA	NA	NA	NA	16.7608	NA	NA	NA	NA	17.3543	NA	NA	NA	NA	NA	21.0435	17.9096	NA	NA	NA	NA	NA	NA	NA	NA	16.8164	17.6856	NA	NA	NA	16.4311	32.0321	25.6789	NA	11.1071	20.3174
C3N-01943-T	Tumor	HNSCC	18.925	18.2774	0.208033	NA	NA	NA	NA	20.5712	NA	NA	NA	NA	NA	NA	NA	17.6279	NA	NA	NA	NA	18.3403	NA	NA	NA	NA	NA	21.455	18.2007	NA	NA	NA	NA	NA	NA	NA	NA	16.8492	17.353	NA	NA	NA	15.8221	30.7825	26.9012	NA	11.1657	20.0967
C3N-01944-N	Normal	HNSCC	20.6648	17.9707	-0.201165	NA	NA	NA	NA	19.6932	NA	NA	NA	NA	NA	NA	NA	16.1822	NA	NA	NA	NA	NA	NA	NA	NA	NA	NA	21.7423	NA	NA	NA	NA	14.2651	NA	NA	NA	NA	NA	NA	NA	NA	NA	NA	32.3109	25.0234	NA	NA	20.3564
C3N-01944-T	Tumor	HNSCC	19.3245	18.859	0.766047	NA	NA	NA	NA	20.8876	NA	NA	NA	NA	NA	NA	NA	18.4527	NA	NA	NA	NA	NA	NA	NA	NA	NA	NA	21.249	NA	NA	NA	NA	14.8465	NA	NA	NA	NA	NA	NA	NA	NA	NA	NA	31.5556	25.1579	NA	NA	20.8126
C3N-01945-T	Tumor	HNSCC	20.2829	17.9014	-0.247938	NA	14.818	NA	14.7652	20.7803	NA	NA	NA	NA	NA	NA	NA	NA	NA	NA	NA	NA	18.4338	NA	NA	NA	18.1337	NA	21.3739	18.6131	NA	NA	NA	19.0407	NA	NA	NA	NA	17.121	17.5905	NA	NA	NA	16.2456	31.4613	25.6455	NA	NA	20.6476
C3N-01946-N	Normal	HNSCC	19.1061	17.6058	-0.474278	NA	15.1201	NA	14.7645	19.6807	NA	NA	NA	NA	NA	NA	NA	NA	NA	NA	NA	NA	17.6508	NA	NA	NA	17.9896	NA	21.0811	18.5422	NA	NA	NA	18.7289	NA	NA	NA	NA	17.0088	17.8749	NA	NA	NA	15.2219	31.6077	25.6417	NA	NA	20.8493
C3N-01946-T	Tumor	HNSCC	19.9235	17.7669	-0.361248	NA	14.986	NA	15.5172	20.3154	NA	NA	NA	NA	NA	NA	NA	NA	NA	NA	NA	NA	19.18	NA	NA	NA	17.9465	NA	21.6575	18.0794	NA	NA	NA	18.8902	NA	NA	NA	NA	16.4654	17.0045	NA	NA	NA	15.3945	31.3205	25.5168	NA	NA	20.2905
C3N-01947-N	Normal	HNSCC	17.7346	18.132	0.132724	NA	NA	NA	NA	19.8263	NA	NA	NA	NA	NA	NA	NA	NA	NA	14.9986	NA	NA	NA	NA	NA	NA	18.2597	NA	20.6451	17.4742	NA	NA	NA	NA	NA	NA	NA	NA	NA	NA	NA	19.665	NA	16.0551	31.8334	25.0157	NA	NA	19.6681
C3N-01947-T	Tumor	HNSCC	18.5699	18.263	0.21455	NA	NA	NA	NA	20.5963	NA	NA	NA	NA	NA	NA	NA	NA	NA	14.9671	NA	NA	NA	NA	NA	NA	17.9738	NA	21.0882	17.9256	NA	NA	NA	NA	NA	NA	NA	NA	NA	NA	NA	19.6461	NA	15.6441	31.6265	25.2439	NA	NA	20.4819
C3N-01948-T	Tumor	HNSCC	NA	19.267	NA	NA	NA	NA	NA	20.5971	NA	NA	NA	NA	NA	NA	NA	NA	NA	NA	NA	NA	18.4312	NA	NA	NA	NA	NA	21.3322	NA	NA	NA	NA	NA	NA	NA	NA	NA	16.7073	NA	NA	NA	NA	NA	31.5153	25.1989	NA	NA	20.7839
C3N-01997-N	Normal	PDA	NA	16.5816	NA	NA	NA	NA	NA	NA	NA	NA	NA	NA	NA	NA	NA	16.2712	NA	16.8921	NA	NA	NA	NA	NA	NA	NA	NA	NA	NA	NA	NA	NA	NA	NA	NA	NA	NA	NA	NA	NA	NA	NA	NA	30.5672	24.1755	NA	NA	NA
C3N-01997-T	Tumor	PDA	NA	17.3759	NA	NA	NA	NA	NA	NA	NA	NA	NA	NA	NA	NA	NA	18.3148	NA	16.4369	NA	NA	NA	NA	NA	NA	NA	NA	NA	NA	NA	NA	NA	NA	NA	NA	NA	NA	NA	NA	NA	NA	NA	NA	31.1372	24.5115	NA	NA	NA
C3N-01998-N	Normal	PDA	NA	16.7822	NA	NA	NA	NA	NA	NA	NA	NA	NA	NA	NA	NA	NA	17.7666	NA	16.118	NA	NA	NA	NA	NA	NA	NA	NA	19.7226	NA	NA	NA	NA	16.8072	NA	NA	NA	NA	NA	13.4964	NA	NA	NA	NA	32.5467	24.1427	NA	NA	NA
C3N-01998-T	Tumor	PDA	NA	16.742	NA	NA	NA	NA	NA	NA	NA	NA	NA	NA	NA	NA	NA	18.3289	NA	16.9741	NA	NA	NA	NA	NA	NA	NA	NA	18.656	NA	NA	NA	NA	16.3396	NA	NA	NA	NA	NA	13.4116	NA	NA	NA	NA	31.1614	24.579	NA	NA	NA
C3N-02000-N	Normal	LUAD	19.8608	17.0573	-1.06717	NA	NA	NA	NA	NA	NA	NA	NA	NA	NA	NA	NA	NA	NA	15.5951	NA	NA	17.2527	NA	NA	NA	17.3589	NA	19.1442	15.9359	NA	NA	NA	NA	NA	NA	NA	NA	NA	NA	NA	NA	NA	NA	32.2778	24.5112	NA	NA	20.0941
C3N-02000-T	Tumor	LUAD	21.4533	17.6096	-0.608728	NA	NA	NA	NA	NA	NA	NA	NA	NA	NA	NA	NA	NA	NA	15.6342	NA	NA	18.7587	NA	NA	NA	18.0495	NA	19.06	16.5455	NA	NA	NA	NA	NA	NA	NA	NA	NA	NA	NA	NA	NA	NA	31.8135	24.7457	NA	NA	20.2398
C3N-02002-N	Normal	LUAD	21.1624	16.9218	-1.27933	NA	NA	15.7891	NA	NA	NA	NA	NA	NA	NA	NA	NA	16.4401	NA	15.9734	NA	NA	17.4686	NA	NA	NA	17.8308	NA	NA	18.0291	NA	NA	NA	NA	NA	NA	NA	NA	NA	NA	NA	NA	NA	NA	32.3853	24.6488	NA	NA	20.1096
C3N-02002-T	Tumor	LUAD	20.6874	17.1897	-0.983494	NA	NA	15.8642	NA	NA	NA	NA	NA	NA	NA	NA	NA	17.3149	NA	15.9223	NA	NA	18.2785	NA	NA	NA	17.5577	NA	NA	18.2006	NA	NA	NA	NA	NA	NA	NA	NA	NA	NA	NA	NA	NA	NA	31.578	24.5483	NA	NA	20.4848
C3N-02003-N	Normal	LUAD	NA	17.7336	NA	NA	NA	NA	NA	NA	NA	NA	NA	NA	NA	NA	NA	NA	NA	NA	NA	NA	17.6696	NA	NA	NA	NA	NA	NA	17.7977	NA	NA	NA	NA	NA	NA	NA	NA	NA	NA	NA	NA	NA	NA	32.3923	24.493	NA	NA	20.0771
C3N-02003-T	Tumor	LUAD	NA	19.703	NA	NA	NA	NA	NA	NA	NA	NA	NA	NA	NA	NA	NA	NA	NA	NA	NA	NA	20.0473	NA	NA	NA	NA	NA	NA	19.3587	NA	NA	NA	NA	NA	NA	NA	NA	NA	NA	NA	NA	NA	NA	31.8028	25.9567	NA	NA	20.1096
C3N-02010-N	Normal	PDA	NA	17.5931	NA	NA	NA	NA	NA	NA	NA	NA	NA	NA	NA	NA	NA	18.2652	NA	NA	NA	NA	16.921	NA	NA	NA	NA	NA	NA	NA	NA	NA	NA	NA	NA	NA	NA	NA	NA	NA	NA	NA	NA	NA	31.7562	23.9761	NA	NA	NA
C3N-02010-T	Tumor	PDA	NA	18.0662	NA	NA	NA	NA	NA	NA	NA	NA	NA	NA	NA	NA	NA	18.9723	NA	NA	NA	NA	17.16	NA	NA	NA	NA	NA	NA	NA	NA	NA	NA	NA	NA	NA	NA	NA	NA	NA	NA	NA	NA	NA	31.2022	24.7081	NA	NA	NA
C3N-02067-N	Normal	LUAD	22.7098	17.5911	-0.701191	NA	NA	NA	NA	NA	NA	NA	NA	NA	NA	NA	NA	NA	NA	NA	NA	NA	17.5911	NA	NA	NA	NA	NA	NA	NA	NA	NA	NA	NA	NA	NA	NA	NA	NA	NA	NA	NA	NA	NA	32.6065	24.6018	NA	NA	20.0137
C3N-02067-T	Tumor	LUAD	21.8128	18.7212	0.481756	NA	NA	NA	NA	NA	NA	NA	NA	NA	NA	NA	NA	NA	NA	NA	NA	NA	18.7212	NA	NA	NA	NA	NA	NA	NA	NA	NA	NA	NA	NA	NA	NA	NA	NA	NA	NA	NA	NA	NA	31.9501	24.9627	NA	NA	19.7334
C3N-02087-N	Normal	LUAD	23.064	16.2215	-2.09171	NA	NA	NA	NA	NA	NA	NA	NA	NA	NA	NA	NA	16.1463	NA	NA	NA	NA	17.0266	NA	NA	NA	NA	NA	18.6918	NA	NA	NA	NA	NA	NA	NA	NA	NA	NA	13.0212	NA	NA	NA	NA	32.7113	24.5802	NA	NA	19.9185
C3N-02087-T	Tumor	LUAD	21.3294	18.365	0.153985	NA	NA	NA	NA	NA	NA	NA	NA	NA	NA	NA	NA	19.5641	NA	NA	NA	NA	19.4659	NA	NA	NA	NA	NA	20.3805	NA	NA	NA	NA	NA	NA	NA	NA	NA	NA	14.0495	NA	NA	NA	NA	32.0393	25.6667	NA	NA	19.8515
C3N-02089-N	Normal	LUAD	21.7047	16.5959	-1.63722	NA	NA	16.1234	NA	NA	NA	NA	NA	NA	NA	NA	NA	NA	NA	15.8749	NA	NA	NA	NA	NA	NA	17.7621	NA	18.8374	18.7413	NA	NA	NA	NA	12.2363	NA	NA	NA	NA	NA	NA	NA	NA	NA	32.3462	24.7286	NA	NA	20.1272
C3N-02089-T	Tumor	LUAD	24.3467	18.2824	-0.106287	NA	NA	16.4189	NA	NA	NA	NA	NA	NA	NA	NA	NA	NA	NA	18.0623	NA	NA	NA	NA	NA	NA	19.3349	NA	20.863	19.7446	NA	NA	NA	NA	15.2711	NA	NA	NA	NA	NA	NA	NA	NA	NA	31.2177	26.8221	NA	NA	20.853
C3N-02145-N	Normal	LUAD	21.6896	17.502	-0.730206	NA	NA	NA	NA	NA	NA	NA	NA	NA	NA	NA	NA	16.0807	NA	NA	NA	NA	17.791	NA	NA	NA	17.253	NA	18.3006	18.0847	NA	NA	NA	NA	NA	NA	NA	NA	NA	NA	NA	NA	NA	NA	32.2837	24.2623	NA	NA	19.8844
C3N-02145-T	Tumor	LUAD	21.5353	18.1315	-0.0916541	NA	NA	NA	NA	NA	NA	NA	NA	NA	NA	NA	NA	17.6381	NA	NA	NA	NA	17.6802	NA	NA	NA	17.7181	NA	19.4581	18.1629	NA	NA	NA	NA	NA	NA	NA	NA	NA	NA	NA	NA	NA	NA	31.6873	24.5392	NA	NA	19.7816
C3N-02149-N	Normal	LUAD	21.3842	16.4134	-1.80082	14.9756	NA	NA	NA	NA	NA	NA	NA	NA	NA	NA	NA	NA	NA	15.6139	NA	NA	17.5602	NA	NA	NA	17.504	NA	NA	NA	NA	NA	NA	NA	NA	NA	NA	NA	NA	NA	NA	NA	NA	NA	32.0847	24.4917	NA	NA	20.1899
C3N-02149-T	Tumor	LUAD	22.2626	18.2965	0.0304943	17.1253	NA	NA	NA	NA	NA	NA	NA	NA	NA	NA	NA	19.3176	NA	16.9565	NA	NA	19.546	NA	NA	NA	18.5369	NA	NA	NA	NA	NA	NA	NA	NA	NA	NA	NA	NA	NA	NA	NA	NA	NA	31.4248	24.9912	NA	NA	19.8509
C3N-02155-N	Normal	LUAD	21.0282	16.5341	-1.65921	NA	NA	15.9859	NA	NA	NA	NA	NA	NA	NA	NA	NA	15.4715	NA	15.8185	NA	NA	16.2665	NA	NA	NA	17.5581	NA	NA	18.1038	NA	NA	NA	NA	NA	NA	NA	NA	NA	NA	NA	NA	NA	NA	32.0579	24.768	NA	NA	20.1517
C3N-02155-T	Tumor	LUAD	22.783	19.3111	1.01446	NA	NA	16.7742	NA	NA	NA	NA	NA	NA	NA	NA	NA	21.2639	NA	18.1984	NA	NA	20.161	NA	NA	NA	19.6401	NA	NA	19.8289	NA	NA	NA	NA	NA	NA	NA	NA	NA	NA	NA	NA	NA	NA	31.0832	26.8914	NA	NA	19.5462
C3N-02158-N	Normal	LUAD	21.3811	16.7154	-1.4987	NA	NA	NA	NA	NA	NA	NA	NA	NA	NA	NA	NA	16.0569	NA	NA	NA	NA	17.392	NA	NA	NA	NA	NA	NA	16.6971	NA	NA	NA	NA	NA	NA	NA	NA	NA	NA	NA	NA	NA	NA	32.1503	24.6821	NA	NA	20.2443
C3N-02158-T	Tumor	LUAD	22.5064	18.9265	0.646126	NA	NA	NA	NA	NA	NA	NA	NA	NA	NA	NA	NA	19.0463	NA	NA	NA	NA	19.6327	NA	NA	NA	NA	NA	NA	18.1004	NA	NA	NA	NA	NA	NA	NA	NA	NA	NA	NA	NA	NA	NA	31.3969	25.029	NA	NA	20.1905
C3N-02181-T	Tumor	GBM	19.1986	19.7627	1.67719	NA	NA	NA	NA	20.5132	NA	NA	NA	NA	NA	NA	NA	19.9513	NA	NA	NA	NA	20.0606	NA	NA	NA	NA	17.1069	21.1813	NA	NA	NA	NA	NA	NA	NA	NA	NA	NA	NA	NA	NA	NA	NA	32.5178	25.6097	NA	NA	NA
C3N-02183-T	Tumor	GBM	19.2872	17.8905	-0.200269	NA	NA	NA	NA	NA	NA	NA	NA	NA	NA	NA	NA	NA	NA	NA	NA	NA	NA	NA	NA	NA	NA	NA	20.9408	19.3086	NA	NA	14.5034	NA	NA	NA	NA	NA	NA	16.809	NA	NA	NA	NA	33.1779	25.2575	NA	NA	19.8124
C3N-02185-T	Tumor	GBM	19.0778	18.0803	0.00190599	NA	NA	NA	NA	NA	NA	15.3153	NA	NA	NA	NA	NA	20.2575	NA	NA	NA	NA	NA	NA	NA	NA	NA	17.0616	18.8048	19.4483	NA	NA	NA	NA	NA	NA	NA	NA	NA	17.5943	NA	NA	NA	NA	32.2669	26.3546	NA	NA	18.754
C3N-02186-T	Tumor	GBM	18.6004	17.4585	-0.591741	NA	NA	NA	NA	19.7477	NA	NA	NA	NA	NA	NA	NA	19.2345	NA	15.076	NA	NA	NA	18.0601	NA	NA	NA	17.0157	19.8109	18.441	NA	NA	NA	14.0713	NA	NA	NA	NA	15.6697	NA	NA	NA	NA	NA	32.2566	25.5486	NA	16.3445	NA
C3N-02188-T	Tumor	GBM	NA	19.5943	NA	NA	NA	NA	NA	NA	NA	NA	NA	NA	NA	NA	NA	19.9819	NA	NA	NA	NA	19.9383	NA	NA	NA	NA	NA	19.707	18.75	NA	NA	NA	NA	NA	NA	NA	NA	NA	NA	NA	NA	NA	NA	32.9502	25.5367	NA	NA	NA
C3N-02190-T	Tumor	GBM	NA	20.1057	NA	NA	NA	NA	NA	NA	NA	NA	NA	NA	NA	NA	NA	20.2366	NA	NA	NA	NA	20.7157	NA	NA	NA	NA	NA	20.2777	19.1928	NA	NA	NA	NA	NA	NA	NA	NA	NA	NA	NA	NA	NA	NA	32.6223	25.6294	NA	NA	NA
C3N-02252-N	Normal	LSCC	20.1994	18.301	0.156506	NA	NA	NA	NA	19.116	NA	NA	NA	NA	NA	NA	NA	17.9776	NA	18.3576	NA	NA	NA	NA	NA	NA	18.5791	NA	18.8493	17.9408	NA	NA	NA	NA	NA	NA	NA	NA	17.2863	NA	NA	NA	NA	NA	32.1937	24.957	NA	NA	NA
C3N-02252-T	Tumor	LSCC	21.1436	19.5591	1.35906	NA	NA	NA	NA	20.9597	NA	NA	NA	NA	NA	NA	NA	20.6739	NA	19.2438	NA	NA	NA	NA	NA	NA	18.3015	NA	20.0149	19.8238	NA	NA	NA	NA	NA	NA	NA	NA	17.8963	NA	NA	NA	NA	NA	30.9661	26.3606	NA	NA	NA
C3N-02255-T	Tumor	GBM	NA	18.257	NA	NA	NA	NA	NA	19.9547	NA	NA	NA	NA	NA	NA	NA	NA	NA	NA	NA	NA	NA	17.3131	NA	NA	NA	16.4295	21.2895	18.5352	NA	NA	NA	NA	NA	NA	NA	NA	NA	NA	16.0199	NA	NA	NA	32.3856	26.2369	NA	NA	18.1216
C3N-02256-T	Tumor	GBM	19.5	17.7262	-0.377027	NA	NA	NA	NA	NA	NA	NA	NA	NA	14.5427	NA	NA	NA	NA	NA	NA	NA	NA	NA	NA	NA	NA	17.5455	20.073	18.7437	NA	NA	NA	NA	NA	NA	NA	NA	NA	NA	NA	NA	NA	NA	32.2353	25.4512	NA	NA	19.0595
C3N-02275-T	Tumor	HNSCC	NA	18.8098	NA	NA	NA	NA	NA	20.7758	NA	NA	NA	NA	NA	NA	NA	NA	NA	NA	NA	NA	NA	NA	NA	NA	NA	NA	21.068	18.5331	NA	NA	NA	19.1423	NA	NA	NA	NA	16.8061	NA	NA	NA	NA	16.5335	30.251	25.4979	NA	NA	19.992
C3N-02279-N	Normal	HNSCC	19.3605	18.2432	0.148208	NA	NA	NA	NA	20.818	NA	NA	NA	NA	NA	NA	NA	16.6996	NA	NA	NA	NA	NA	NA	NA	NA	18.1871	NA	21.3772	18.0799	NA	NA	NA	16.5709	NA	NA	NA	NA	NA	NA	NA	NA	NA	15.97	32.1586	25.5349	NA	NA	20.0539
C3N-02279-T	Tumor	HNSCC	19.426	18.8127	0.713835	NA	NA	NA	NA	20.9097	NA	NA	NA	NA	NA	NA	NA	17.3932	NA	NA	NA	NA	NA	NA	NA	NA	18.2765	NA	21.8455	19.1282	NA	NA	NA	17.629	NA	NA	NA	NA	NA	NA	NA	NA	NA	16.507	30.8132	25.3332	NA	NA	20.2125
C3N-02283-T	Tumor	LSCC	22.0021	19.8162	1.56555	NA	NA	NA	NA	NA	NA	NA	NA	NA	NA	NA	NA	20.9204	NA	NA	NA	NA	18.6466	NA	NA	NA	18.8501	NA	20.4875	20.1763	NA	NA	NA	NA	NA	NA	NA	NA	NA	NA	NA	NA	NA	NA	31.9281	27.2841	NA	18.4225	20.2678
C3N-02284-T	Tumor	LSCC	22.0417	19.8984	1.64541	17.9859	NA	NA	NA	22.2629	NA	NA	NA	NA	NA	NA	NA	21.1925	NA	NA	NA	NA	19.3144	NA	NA	NA	20.0736	NA	20.847	20.6956	NA	NA	NA	18.3558	NA	NA	NA	NA	18.3577	NA	NA	NA	NA	NA	30.4894	27.2772	NA	NA	20.1979
C3N-02285-N	Normal	LSCC	22.314	17.4743	-0.794713	14.9603	16.9909	NA	NA	18.6768	NA	NA	NA	NA	NA	NA	NA	NA	NA	NA	NA	NA	17.4061	NA	NA	NA	18.3715	NA	19.1717	NA	NA	NA	NA	NA	NA	NA	NA	NA	16.7429	NA	NA	NA	NA	NA	32.4317	24.9141	NA	NA	20.9023
C3N-02285-T	Tumor	LSCC	21.562	19.2571	1.03243	17.143	16.7846	NA	NA	20.8545	NA	NA	NA	NA	NA	NA	NA	20.842	NA	NA	NA	NA	19.5213	NA	NA	NA	19.0839	NA	20.6042	20.1981	NA	NA	NA	NA	NA	NA	NA	NA	18.2827	NA	NA	NA	NA	NA	31.3534	26.3945	NA	NA	21.2147
C3N-02288-N	Normal	LSCC	20.5179	18.0761	-0.0870871	NA	NA	NA	NA	NA	NA	NA	NA	NA	NA	NA	NA	17.3414	NA	NA	NA	NA	17.7524	NA	NA	NA	NA	NA	19.469	18.6461	NA	NA	NA	17.812	NA	NA	NA	NA	17.4358	NA	NA	NA	NA	NA	32.0105	24.9883	NA	NA	20.5487
C3N-02288-T	Tumor	LSCC	21.1061	20.4579	2.26009	NA	NA	NA	NA	NA	NA	NA	NA	NA	NA	NA	NA	22.5547	NA	NA	NA	NA	20.9923	NA	NA	NA	NA	NA	21.3054	21.2454	NA	NA	NA	18.4056	NA	NA	NA	NA	18.2443	NA	NA	NA	NA	NA	31.0848	27.2313	NA	NA	19.7441
C3N-02289-N	Normal	LSCC	20.3609	17.97	-0.183952	NA	NA	16.82	NA	19.7934	NA	NA	NA	NA	NA	NA	NA	18.1771	NA	19.1088	NA	NA	17.808	NA	NA	NA	18.1503	NA	19.4191	18.2412	NA	NA	NA	17.3306	NA	NA	NA	NA	NA	NA	14.8516	NA	NA	NA	32.1283	25.2241	NA	NA	20.4369
C3N-02289-T	Tumor	LSCC	21.6876	18.8688	0.636709	NA	NA	16.2067	NA	21.0725	NA	NA	NA	NA	NA	NA	NA	20.626	NA	19.6816	NA	NA	19.1631	NA	NA	NA	18.7177	NA	20.2883	19.9143	NA	NA	NA	17.6508	NA	NA	NA	NA	NA	NA	15.3674	NA	NA	NA	31.8596	26.0042	NA	NA	20.4016
C3N-02295-N	Normal	PDA	NA	18.9888	NA	NA	NA	NA	NA	NA	NA	NA	NA	NA	NA	NA	NA	17.711	NA	NA	NA	NA	NA	NA	NA	NA	NA	NA	NA	NA	NA	NA	NA	NA	NA	NA	NA	NA	NA	NA	NA	20.2666	NA	NA	30.7539	23.1701	NA	NA	NA
C3N-02295-T	Tumor	PDA	NA	18.5111	NA	NA	NA	NA	NA	NA	NA	NA	NA	NA	NA	NA	NA	17.8118	NA	NA	NA	NA	NA	NA	NA	NA	NA	NA	NA	NA	NA	NA	NA	NA	NA	NA	NA	NA	NA	NA	NA	19.2104	NA	NA	32.6929	23.7484	NA	NA	NA
C3N-02300-N	Normal	LSCC	22.2976	18.9157	0.647693	NA	NA	NA	NA	21.8412	NA	NA	NA	NA	NA	NA	15.0778	20.9323	NA	19.8457	NA	NA	20.1522	NA	NA	NA	NA	NA	NA	20.5014	NA	NA	NA	NA	NA	NA	NA	NA	18.5368	14.4384	NA	NA	NA	NA	30.8023	26.962	NA	NA	19.8484
C3N-02300-T	Tumor	LSCC	22.4216	18.8668	0.591479	NA	NA	NA	NA	21.7798	NA	NA	NA	NA	NA	NA	14.8272	21.4827	NA	19.8079	NA	NA	20.1384	NA	NA	NA	NA	NA	NA	19.9695	NA	NA	NA	NA	NA	NA	NA	NA	18.3296	14.5995	NA	NA	NA	NA	31.0285	27.1915	NA	NA	19.7386
C3N-02333-T	Tumor	HNSCC	NA	18.0881	NA	NA	NA	NA	NA	NA	14.5831	NA	NA	NA	NA	NA	NA	17.7334	NA	NA	NA	NA	18.3941	NA	NA	NA	NA	NA	21.0147	NA	NA	NA	NA	NA	NA	NA	NA	NA	NA	NA	NA	18.715	NA	NA	31.278	25.4107	NA	NA	21.0305
C3N-02339-N	Normal	LSCC	20.9402	18.2895	0.1014	NA	NA	NA	NA	19.1145	NA	NA	NA	NA	NA	NA	NA	17.7246	NA	NA	NA	NA	NA	NA	NA	NA	NA	NA	16.7499	19.7168	NA	NA	NA	NA	NA	NA	NA	NA	18.1416	NA	NA	NA	NA	NA	32.0786	24.9797	NA	NA	20.4331
C3N-02339-T	Tumor	LSCC	21.5204	18.145	-0.0772442	NA	NA	NA	NA	20.3971	NA	NA	NA	NA	NA	NA	NA	19.897	NA	NA	NA	NA	NA	NA	NA	NA	NA	NA	17.0319	19.8952	NA	NA	NA	13.3376	NA	NA	NA	NA	18.3113	NA	NA	NA	NA	NA	31.894	25.7216	NA	NA	20.4709
C3N-02374-N	Normal	LSCC	20.2428	18.2685	0.121484	NA	NA	NA	NA	NA	NA	NA	NA	NA	NA	NA	NA	18.1922	NA	NA	NA	NA	17.809	NA	NA	NA	NA	NA	19.3313	18.528	NA	NA	NA	18.3058	NA	NA	NA	NA	17.4447	NA	NA	NA	NA	NA	32.153	24.9285	NA	NA	20.5764
C3N-02374-T	Tumor	LSCC	20.8787	20.1521	1.9676	NA	NA	NA	NA	NA	NA	NA	NA	NA	NA	NA	NA	20.6217	NA	NA	NA	NA	19.1678	NA	NA	NA	NA	NA	21.5234	21.5392	NA	NA	NA	18.7687	NA	NA	NA	NA	19.2917	NA	NA	NA	NA	NA	30.7649	27.0433	NA	NA	21.037
C3N-02375-N	Normal	LSCC	21.2785	17.3986	-0.809407	NA	NA	NA	NA	18.8285	NA	NA	NA	NA	NA	NA	13.1841	18.0693	NA	18.4331	NA	NA	17.521	NA	NA	NA	NA	NA	NA	18.5781	NA	NA	NA	NA	NA	NA	NA	NA	17.1761	NA	NA	NA	NA	NA	32.1637	25.0369	NA	NA	20.8805
C3N-02375-T	Tumor	LSCC	22.3916	19.3262	1.05259	NA	NA	NA	NA	22.4419	NA	NA	NA	NA	NA	NA	14.9993	21.5076	NA	20.2844	NA	NA	20.1751	NA	NA	NA	NA	NA	NA	20.8967	NA	NA	NA	NA	NA	NA	NA	NA	19.051	15.2534	NA	NA	NA	NA	30.426	26.5846	NA	NA	20.9186
C3N-02379-N	Normal	LUAD	NA	18.472	NA	NA	NA	NA	NA	NA	NA	NA	NA	NA	NA	NA	NA	NA	NA	NA	NA	NA	18.5323	NA	NA	NA	NA	NA	NA	18.4118	NA	NA	NA	NA	NA	NA	NA	NA	NA	NA	NA	NA	NA	NA	32.2069	24.499	NA	NA	20.6303
C3N-02379-T	Tumor	LUAD	22.6009	18.1265	-0.15941	17.5156	NA	15.9447	NA	18.8301	NA	NA	NA	NA	NA	NA	NA	20.2304	NA	16.8635	NA	NA	20.6061	NA	NA	NA	18.6881	NA	20.2258	17.9324	NA	NA	NA	NA	NA	NA	NA	NA	NA	NA	NA	NA	NA	14.4281	31.5743	25.7767	NA	17.2456	20.5634
C3N-02380-N	Normal	LUAD	21.9337	14.5578	-3.68883	NA	NA	NA	NA	NA	NA	NA	NA	NA	NA	NA	NA	16.0285	NA	NA	NA	NA	NA	NA	NA	NA	NA	NA	NA	NA	NA	NA	NA	NA	NA	NA	NA	NA	NA	13.087	NA	NA	NA	NA	32.4273	24.4582	NA	NA	NA
C3N-02380-T	Tumor	LUAD	21.0203	17.7876	-0.405205	NA	NA	NA	NA	17.0956	NA	NA	NA	NA	NA	NA	NA	NA	NA	NA	NA	NA	18.1975	NA	NA	NA	17.5762	NA	NA	18.2811	NA	NA	NA	NA	NA	NA	NA	NA	NA	NA	NA	NA	NA	NA	31.7685	24.675	NA	NA	19.6352
C3N-02421-N	Normal	LUAD	22.0087	16.8429	-1.40816	NA	NA	NA	NA	NA	NA	NA	NA	NA	NA	NA	NA	15.9257	NA	NA	NA	NA	17.39	NA	NA	NA	NA	NA	NA	17.2129	NA	NA	NA	NA	NA	NA	NA	NA	NA	NA	NA	NA	NA	NA	32.259	24.5885	NA	NA	20.1218
C3N-02421-T	Tumor	LUAD	21.1869	17.605	-0.597648	NA	NA	NA	NA	NA	NA	NA	NA	NA	NA	NA	NA	17.8728	NA	NA	NA	NA	17.7162	NA	NA	NA	NA	NA	NA	17.2259	NA	NA	NA	NA	NA	NA	NA	NA	NA	NA	NA	NA	NA	NA	32.0464	24.7165	NA	NA	21.0711
C3N-02422-T	Tumor	LUAD	21.7778	18.6217	0.38432	NA	NA	NA	NA	NA	NA	NA	NA	NA	NA	NA	NA	NA	NA	NA	NA	NA	18.6217	NA	NA	NA	NA	NA	NA	NA	NA	NA	NA	NA	NA	NA	NA	NA	NA	NA	NA	NA	NA	NA	31.4873	25.0403	NA	NA	20.1859
C3N-02423-N	Normal	LUAD	22.7922	17.2397	-1.05745	NA	NA	NA	NA	NA	NA	NA	NA	NA	NA	NA	NA	16.5706	NA	NA	NA	NA	17.5712	NA	NA	NA	17.5774	NA	NA	NA	NA	NA	NA	NA	NA	NA	NA	NA	NA	NA	NA	NA	NA	NA	32.2204	24.4562	NA	NA	19.9335
C3N-02423-T	Tumor	LUAD	21.3737	19.114	0.900424	NA	NA	NA	NA	NA	NA	NA	NA	NA	NA	NA	NA	19.9429	NA	NA	NA	NA	19.6217	NA	NA	NA	17.7775	NA	NA	NA	NA	NA	NA	NA	NA	NA	NA	NA	NA	NA	NA	NA	NA	NA	31.7303	26.0193	NA	NA	19.9656
C3N-02424-N	Normal	LUAD	21.5171	16.59	-1.63211	15.4059	NA	NA	NA	NA	NA	NA	NA	NA	NA	NA	NA	16.5406	NA	15.6796	NA	NA	17.5388	NA	NA	NA	17.7849	NA	NA	NA	NA	NA	NA	NA	NA	NA	NA	NA	NA	NA	NA	NA	NA	NA	32.3132	24.7099	NA	NA	20.0827
C3N-02424-T	Tumor	LUAD	23.1264	18.6878	0.370933	17.3903	NA	NA	NA	NA	NA	NA	NA	NA	NA	NA	NA	20.1025	NA	17.5373	NA	NA	19.602	NA	NA	NA	18.8068	NA	NA	NA	NA	NA	NA	NA	NA	NA	NA	NA	NA	NA	NA	NA	NA	NA	31.9113	26.0532	NA	NA	21.0976
C3N-02425-N	Normal	LSCC	20.7212	16.9409	-1.23429	NA	16.5965	16.6172	NA	19.2648	NA	13.0351	NA	NA	NA	NA	NA	17.6609	NA	NA	NA	NA	18.0396	NA	NA	NA	18.2006	NA	17.1159	18.3788	NA	NA	NA	17.1649	NA	NA	NA	NA	16.7217	NA	14.4947	NA	NA	NA	32.1055	25.5184	NA	NA	19.9904
C3N-02425-T	Tumor	LSCC	22.801	18.8635	0.565789	NA	17.0038	16.9084	NA	22.0023	NA	16.6815	NA	NA	NA	NA	NA	21.8638	NA	NA	NA	NA	19.8397	NA	NA	NA	19.9136	NA	18.8888	20.2352	NA	NA	NA	18.4726	NA	NA	NA	NA	18.3261	NA	16.2259	NA	NA	NA	30.4998	26.3899	NA	NA	20.6521
C3N-02426-N	Normal	LSCC	21.8534	17.6867	-0.555206	14.6222	NA	NA	NA	19.1733	NA	NA	NA	NA	NA	NA	NA	18.0942	NA	NA	NA	NA	17.1699	NA	NA	NA	18.0348	NA	19.1576	19.1095	NA	NA	NA	17.0295	NA	NA	NA	NA	16.7892	NA	NA	NA	NA	NA	32.0531	24.7761	NA	NA	20.6219
C3N-02426-T	Tumor	LSCC	21.2687	19.0741	0.866702	17.0351	NA	NA	NA	20.4621	NA	NA	NA	NA	NA	NA	NA	20.3414	NA	NA	NA	NA	19.3818	NA	NA	NA	18.8173	NA	20.5894	19.1336	NA	NA	NA	18.3144	NA	NA	NA	NA	17.5921	NA	NA	NA	NA	NA	31.6311	25.9251	NA	NA	20.0596
C3N-02433-N	Normal	LUAD	21.4159	17.4499	-0.766222	NA	NA	16.1064	NA	NA	NA	NA	NA	NA	NA	NA	NA	16.7647	NA	NA	NA	NA	17.8226	NA	NA	NA	18.6534	NA	18.9563	16.3959	NA	NA	NA	NA	NA	NA	NA	NA	NA	NA	NA	NA	NA	NA	31.929	24.6823	NA	NA	NA
C3N-02433-T	Tumor	LUAD	20.9685	17.5482	-0.641563	NA	NA	15.8641	NA	NA	NA	NA	NA	NA	NA	NA	NA	18.2193	NA	NA	NA	NA	18.739	NA	NA	NA	17.3525	NA	19.161	15.9533	NA	NA	NA	NA	NA	NA	NA	NA	NA	NA	NA	NA	NA	NA	31.8772	24.635	NA	NA	NA
C3N-02434-N	Normal	LSCC	20.7044	17.7141	-0.460101	NA	NA	NA	NA	19.3903	NA	NA	NA	NA	NA	NA	NA	18.3169	NA	NA	NA	NA	NA	NA	NA	NA	NA	NA	17.4628	19.4134	NA	NA	NA	13.364	NA	NA	NA	NA	18.3371	NA	NA	NA	NA	NA	32.1647	25.3349	NA	NA	19.9843
C3N-02434-T	Tumor	LSCC	23.1045	20.0396	1.72399	NA	NA	NA	NA	22.6891	NA	NA	NA	NA	NA	NA	NA	22.1521	NA	NA	NA	NA	NA	NA	NA	NA	NA	NA	19.4932	22.1391	NA	NA	NA	15.7744	NA	NA	NA	NA	17.9894	NA	NA	NA	NA	NA	30.6077	26.9117	NA	NA	19.4265
C3N-02435-N	Normal	LSCC	20.3274	17.1286	-1.02335	NA	NA	15.6897	NA	19.3331	NA	NA	NA	NA	NA	NA	NA	NA	NA	NA	NA	NA	NA	NA	NA	NA	18.2284	NA	18.947	18.8609	NA	NA	NA	11.7127	NA	NA	NA	NA	NA	NA	NA	NA	NA	NA	31.9804	25.2473	NA	NA	20.3988
C3N-02435-T	Tumor	LSCC	22.1296	19.1376	0.879483	NA	NA	17.7173	NA	22.3076	NA	NA	NA	NA	NA	NA	NA	NA	NA	NA	NA	NA	NA	NA	NA	NA	20.1457	NA	21.1136	20.3889	NA	NA	NA	13.1528	NA	NA	NA	NA	NA	NA	NA	NA	NA	NA	31.0623	26.6086	NA	NA	20.149
C3N-02494-N	Normal	LSCC	20.9691	18.5314	0.341628	NA	NA	NA	NA	19.162	NA	NA	NA	NA	NA	NA	NA	NA	NA	NA	NA	NA	17.7777	NA	NA	NA	NA	NA	19.6514	18.9857	NA	NA	NA	NA	NA	NA	NA	NA	17.0802	NA	NA	NA	NA	NA	32.3047	24.7983	NA	17.8777	20.7637
C3N-02494-T	Tumor	LSCC	21.6261	20.0152	1.78675	NA	NA	NA	NA	21.5874	NA	NA	NA	NA	NA	NA	NA	21.1519	NA	NA	NA	NA	19.2307	NA	NA	NA	NA	NA	20.4047	19.6088	NA	NA	NA	NA	NA	NA	NA	NA	18.1079	NA	NA	NA	NA	NA	31.1077	26.8149	NA	18.2389	19.293
C3N-02523-N	Normal	LSCC	21.5219	17.7547	-0.467597	14.7267	NA	NA	NA	19.4923	NA	NA	NA	NA	NA	NA	NA	17.8599	NA	NA	NA	NA	17.5284	NA	NA	NA	18.2839	NA	19.528	18.1495	NA	NA	NA	16.9509	NA	NA	NA	NA	17.2731	NA	NA	NA	NA	NA	31.9328	24.8585	NA	NA	20.334
C3N-02523-T	Tumor	LSCC	22.3679	20.6039	2.33176	18.6547	NA	NA	NA	22.4611	NA	NA	NA	NA	NA	NA	NA	22.715	NA	NA	NA	NA	21.0878	NA	NA	NA	20.233	NA	21.496	20.7271	NA	NA	NA	18.6537	NA	NA	NA	NA	19.407	NA	NA	NA	NA	NA	31.0924	26.5918	NA	NA	19.6224
C3N-02529-N	Normal	LUAD	22.4038	17.2723	-1.002	NA	NA	NA	NA	NA	NA	NA	NA	NA	NA	NA	NA	NA	NA	NA	NA	NA	17.2723	NA	NA	NA	NA	NA	NA	NA	NA	NA	NA	NA	NA	NA	NA	NA	NA	NA	NA	NA	NA	NA	32.508	24.5677	NA	NA	20.0708
C3N-02529-T	Tumor	LUAD	21.3975	20.1893	1.9743	NA	NA	NA	NA	NA	NA	NA	NA	NA	NA	NA	NA	NA	NA	NA	NA	NA	20.1893	NA	NA	NA	NA	NA	NA	NA	NA	NA	NA	NA	NA	NA	NA	NA	NA	NA	NA	NA	NA	NA	31.7618	26.1701	NA	NA	20.1487
C3N-02572-N	Normal	LUAD	22.6016	17.8515	-0.434432	NA	NA	NA	NA	NA	NA	NA	NA	NA	NA	NA	NA	NA	NA	NA	NA	NA	17.3433	NA	NA	NA	18.0084	NA	18.2029	NA	NA	NA	NA	NA	NA	NA	NA	NA	NA	NA	NA	NA	NA	NA	32.321	24.362	NA	16.6209	20.0369
C3N-02572-T	Tumor	LUAD	21.5249	19.4783	1.25581	NA	NA	NA	NA	NA	NA	NA	NA	NA	NA	NA	NA	NA	NA	NA	NA	NA	19.8652	NA	NA	NA	18.544	NA	20.0258	NA	NA	NA	NA	NA	NA	NA	NA	NA	NA	NA	NA	NA	NA	NA	32.0395	25.5101	NA	17.8898	19.8514
C3N-02573-N	Normal	PDA	NA	19.5724	NA	NA	NA	NA	NA	NA	NA	NA	NA	NA	NA	NA	NA	16.7814	NA	NA	NA	NA	NA	NA	NA	NA	NA	NA	NA	NA	NA	NA	NA	NA	NA	NA	NA	NA	NA	NA	NA	22.3635	NA	NA	30.6062	23.3707	NA	NA	NA
C3N-02573-T	Tumor	PDA	NA	19.1295	NA	NA	NA	NA	NA	NA	NA	NA	NA	NA	NA	NA	NA	18.867	NA	NA	NA	NA	NA	NA	NA	NA	NA	NA	NA	NA	NA	NA	NA	NA	NA	NA	NA	NA	NA	NA	NA	19.392	NA	NA	32.2202	24.1545	NA	NA	NA
C3N-02575-N	Normal	LSCC	20.7999	18.0506	-0.129266	15.3262	NA	NA	NA	19.2046	NA	NA	NA	NA	NA	NA	NA	NA	NA	NA	NA	NA	18.4341	NA	NA	NA	18.1383	NA	19.8244	18.6545	NA	NA	NA	NA	NA	NA	NA	NA	16.7718	NA	NA	NA	NA	NA	32.2872	24.8288	NA	18.0788	20.6046
C3N-02575-T	Tumor	LSCC	21.6286	19.4043	1.17571	17.3865	NA	NA	NA	21.0684	NA	NA	NA	NA	NA	NA	NA	20.2409	NA	NA	NA	NA	18.9109	NA	NA	NA	19.0578	NA	20.552	20.0157	NA	NA	NA	NA	NA	NA	NA	NA	18.0023	NA	NA	NA	NA	NA	30.6593	26.365	NA	18.6234	20.1104
C3N-02579-T	Tumor	PDA	NA	19.3544	NA	NA	NA	NA	NA	NA	NA	NA	NA	NA	NA	NA	NA	19.3272	NA	NA	NA	NA	NA	NA	NA	NA	NA	NA	19.3817	NA	NA	NA	NA	NA	NA	NA	NA	NA	NA	NA	NA	NA	NA	NA	31.75	24.6068	NA	NA	18.019
C3N-02582-N	Normal	LUAD	21.8755	16.4362	-1.80695	NA	NA	15.799	NA	17.1963	NA	NA	NA	NA	NA	NA	NA	NA	NA	15.8042	NA	NA	NA	NA	NA	NA	17.7518	NA	18.5932	16.7761	NA	NA	NA	NA	NA	NA	NA	NA	NA	NA	NA	NA	NA	13.133	32.5126	24.7806	NA	17.0567	19.9879
C3N-02582-T	Tumor	LUAD	21.6117	16.8236	-1.40403	NA	NA	15.7192	NA	17.8866	NA	NA	NA	NA	NA	NA	NA	18.064	NA	16.028	NA	NA	NA	NA	NA	NA	17.7751	NA	19.1184	16.6811	NA	NA	NA	NA	NA	NA	NA	NA	NA	NA	NA	NA	NA	13.3166	31.8685	25.1068	NA	17.1754	19.5953
C3N-02585-N	Normal	PDA	NA	15.853	NA	NA	NA	NA	NA	NA	NA	NA	NA	NA	NA	NA	NA	17.1711	NA	NA	NA	NA	NA	NA	NA	NA	NA	NA	NA	14.5348	NA	NA	NA	NA	NA	NA	NA	NA	NA	NA	NA	NA	NA	NA	30.4394	23.9115	NA	NA	NA
C3N-02585-T	Tumor	PDA	NA	16.7848	NA	NA	NA	NA	NA	NA	NA	NA	NA	NA	NA	NA	NA	18.192	NA	NA	NA	NA	NA	NA	NA	NA	NA	NA	NA	15.3775	NA	NA	NA	NA	NA	NA	NA	NA	NA	NA	NA	NA	NA	NA	32.1965	24.4508	NA	NA	NA
C3N-02586-N	Normal	LUAD	21.741	18.2116	-0.0236369	NA	NA	NA	NA	NA	NA	NA	NA	NA	NA	NA	NA	NA	NA	NA	NA	NA	17.729	NA	NA	NA	17.9616	NA	18.7884	18.3675	NA	NA	NA	NA	NA	NA	NA	NA	NA	NA	NA	NA	NA	NA	32.6446	24.4143	NA	NA	19.9351
C3N-02586-T	Tumor	LUAD	21.8066	18.548	0.308898	NA	NA	NA	NA	NA	NA	NA	NA	NA	NA	NA	NA	18.9698	NA	NA	NA	NA	18.3833	NA	NA	NA	17.8972	NA	19.3685	18.1213	NA	NA	NA	NA	NA	NA	NA	NA	NA	NA	NA	NA	NA	NA	31.9438	24.9128	NA	NA	19.9158
C3N-02587-N	Normal	LUAD	22.8113	16.4956	-1.80267	NA	NA	NA	NA	NA	NA	NA	NA	NA	NA	NA	NA	15.7827	NA	NA	NA	NA	17.2085	NA	NA	NA	NA	NA	NA	NA	NA	NA	NA	NA	NA	NA	NA	NA	NA	NA	NA	NA	NA	NA	32.3138	24.1958	NA	NA	20.034
C3N-02587-T	Tumor	LUAD	20.7732	17.3594	-0.818823	NA	NA	NA	NA	NA	NA	NA	NA	NA	NA	NA	NA	17.4697	NA	15.7032	NA	NA	18.0749	NA	NA	NA	17.7192	NA	18.7509	16.4387	NA	NA	NA	NA	NA	NA	NA	NA	NA	NA	NA	NA	NA	NA	31.5376	24.6071	NA	NA	20.2652
C3N-02588-N	Normal	LUAD	20.1448	17.4599	-0.681346	NA	NA	NA	NA	NA	NA	NA	NA	NA	NA	NA	NA	16.4476	NA	NA	NA	NA	17.2952	NA	NA	NA	NA	NA	18.6369	NA	NA	NA	NA	NA	NA	NA	NA	NA	NA	NA	NA	NA	NA	NA	32.414	24.1572	NA	NA	20.0822
C3N-02588-T	Tumor	LUAD	22.9363	20.4121	2.10647	NA	NA	NA	NA	NA	NA	NA	NA	NA	NA	NA	NA	20.7004	NA	NA	NA	NA	20.3614	NA	NA	NA	NA	NA	20.1746	NA	NA	NA	NA	NA	NA	NA	NA	NA	NA	NA	NA	NA	NA	NA	31.403	26.3098	NA	NA	18.9811
C3N-02589-N	Normal	PDA	NA	16.7973	NA	NA	NA	NA	NA	NA	NA	NA	NA	NA	NA	NA	NA	17.588	NA	16.0066	NA	NA	NA	NA	NA	NA	NA	NA	NA	NA	NA	NA	NA	NA	NA	NA	NA	NA	NA	NA	NA	NA	NA	NA	31.3992	23.6549	NA	NA	NA
C3N-02589-T	Tumor	PDA	NA	16.6804	NA	NA	NA	NA	NA	NA	NA	NA	NA	NA	NA	NA	NA	17.7514	NA	15.6094	NA	NA	NA	NA	NA	NA	NA	NA	NA	NA	NA	NA	NA	NA	NA	NA	NA	NA	NA	NA	NA	NA	NA	NA	31.9255	23.399	NA	NA	NA
C3N-02592-N	Normal	PDA	NA	18.5573	NA	NA	NA	NA	NA	NA	NA	NA	NA	NA	NA	NA	NA	16.585	NA	NA	NA	NA	NA	NA	NA	NA	NA	NA	NA	NA	NA	NA	NA	NA	NA	NA	NA	NA	NA	NA	NA	20.5296	NA	NA	30.8792	23.6937	NA	NA	19.9142
C3N-02592-T	Tumor	PDA	NA	19.7322	NA	NA	NA	NA	NA	NA	NA	NA	NA	NA	NA	NA	NA	18.0464	NA	NA	NA	NA	NA	NA	NA	NA	NA	NA	NA	NA	NA	NA	NA	NA	NA	NA	NA	NA	NA	NA	NA	21.418	NA	NA	32.4974	24.3747	NA	NA	17.379
C3N-02675-N	Normal	LSCC	21.1722	18.1422	-0.0595152	15.5963	NA	NA	NA	19.2082	NA	NA	NA	NA	NA	NA	NA	18.8245	NA	NA	NA	NA	18.4741	NA	NA	NA	18.519	NA	19.0747	19.1969	NA	NA	NA	17.2261	NA	NA	NA	NA	17.1603	NA	NA	NA	NA	NA	32.4066	25.132	NA	NA	20.5816
C3N-02675-T	Tumor	LSCC	21.1565	18.7664	0.565607	16.5271	NA	NA	NA	20.0923	NA	NA	NA	NA	NA	NA	NA	20.1611	NA	NA	NA	NA	19.0642	NA	NA	NA	18.4034	NA	20.3632	19.2529	NA	NA	NA	17.657	NA	NA	NA	NA	17.3767	NA	NA	NA	NA	NA	31.6389	25.4292	NA	NA	20.8893
C3N-02693-N	Normal	HNSCC	NA	16.9028	NA	NA	NA	NA	14.9894	20.5674	NA	NA	NA	NA	NA	NA	NA	NA	NA	NA	NA	NA	NA	15.3938	NA	15.9229	NA	NA	17.281	18.2748	NA	NA	NA	NA	NA	NA	NA	NA	NA	17.8736	NA	NA	NA	14.92	31.4818	25.7604	NA	NA	20.599
C3N-02694-T	Tumor	HNSCC	19.3587	18.8691	0.774172	NA	NA	NA	NA	20.1792	NA	NA	NA	NA	NA	NA	NA	15.6394	NA	NA	NA	NA	18.2973	NA	NA	NA	NA	NA	21.4342	NA	NA	NA	NA	18.4846	NA	NA	NA	NA	NA	NA	NA	19.1799	NA	NA	31.7761	25.0869	NA	NA	20.7789
C3N-02695-T	Tumor	HNSCC	19.6175	17.4808	-0.629372	NA	NA	NA	NA	NA	NA	NA	NA	NA	NA	NA	NA	17.086	NA	NA	NA	NA	17.8851	NA	NA	NA	NA	NA	NA	NA	NA	NA	NA	NA	NA	NA	NA	NA	NA	NA	NA	NA	NA	17.4714	30.8706	25.4637	NA	NA	NA
C3N-02700-T	Tumor	HNSCC	19.4732	18.0713	-0.0303435	NA	NA	NA	NA	NA	NA	NA	NA	NA	NA	NA	NA	17.6812	NA	15.1446	NA	NA	19.508	NA	NA	NA	NA	NA	21.0091	18.6717	NA	NA	NA	18.9506	NA	NA	NA	NA	16.6087	16.9639	NA	19.7296	NA	16.4459	30.755	26.1002	NA	NA	20.246
C3N-02713-N	Normal	HNSCC	NA	17.0741	NA	NA	NA	NA	15.131	20.2983	NA	NA	NA	NA	NA	NA	NA	NA	NA	NA	NA	NA	NA	15.3567	NA	16.205	NA	NA	17.0305	17.9347	NA	NA	NA	NA	NA	NA	NA	NA	NA	19.133	NA	NA	NA	15.5037	32.4824	25.0531	NA	NA	20.2103
C3N-02713-T	Tumor	HNSCC	NA	18.2501	NA	NA	NA	NA	15.2385	22.096	NA	NA	NA	NA	NA	NA	NA	NA	NA	NA	NA	NA	NA	16.706	NA	17.2291	NA	NA	17.9959	19.7813	NA	NA	NA	NA	NA	NA	NA	NA	NA	20.0942	NA	NA	NA	16.8596	31.6299	27.1519	NA	NA	19.6948
C3N-02714-N	Normal	HNSCC	19.3344	17.8191	-0.274385	NA	NA	NA	NA	20.4935	NA	NA	NA	NA	NA	NA	NA	15.6881	NA	NA	NA	NA	NA	NA	NA	NA	17.6879	NA	20.6239	17.765	NA	NA	NA	16.6798	NA	NA	NA	NA	NA	NA	NA	NA	NA	15.7956	31.7768	25.2976	NA	NA	19.9969
C3N-02714-T	Tumor	HNSCC	19.4667	18.5845	0.483217	NA	NA	NA	NA	20.8705	NA	NA	NA	NA	NA	NA	NA	17.3013	NA	NA	NA	NA	NA	NA	NA	NA	18.2436	NA	21.3108	18.5286	NA	NA	NA	17.2629	NA	NA	NA	NA	NA	NA	NA	NA	NA	16.5738	31.4991	25.3768	NA	NA	20.0223
C3N-02716-T	Tumor	HNSCC	18.9175	16.9094	-1.15954	NA	NA	NA	NA	NA	NA	NA	NA	NA	NA	NA	NA	16.4747	NA	NA	NA	NA	18.4255	NA	NA	NA	NA	NA	NA	NA	NA	NA	NA	NA	NA	NA	NA	NA	NA	NA	NA	NA	NA	15.8279	31.5981	25.2783	NA	NA	NA
C3N-02727-T	Tumor	HNSCC	NA	18.5794	NA	NA	NA	NA	NA	NA	15.0063	NA	NA	NA	NA	NA	NA	17.4965	NA	NA	NA	NA	18.2762	NA	NA	NA	NA	NA	21.5034	NA	NA	NA	NA	NA	NA	NA	NA	NA	NA	NA	NA	20.6144	NA	NA	31.2653	25.1574	NA	NA	19.942
C3N-02729-N	Normal	LUAD	20.3562	16.9284	-1.22529	NA	NA	NA	NA	NA	NA	NA	NA	NA	NA	NA	NA	NA	NA	NA	NA	NA	16.9284	NA	NA	NA	NA	NA	NA	NA	NA	NA	NA	NA	NA	NA	NA	NA	NA	NA	NA	NA	NA	NA	32.2041	24.3377	NA	NA	20.2037
C3N-02729-T	Tumor	LUAD	21.2358	19.1272	0.921729	NA	NA	NA	NA	NA	NA	NA	NA	NA	NA	NA	NA	NA	NA	NA	NA	NA	19.1272	NA	NA	NA	NA	NA	NA	NA	NA	NA	NA	NA	NA	NA	NA	NA	NA	NA	NA	NA	NA	NA	31.9189	24.727	NA	NA	20.1549
C3N-02730-T	Tumor	HNSCC	NA	19.0352	NA	NA	NA	NA	NA	20.1145	NA	NA	NA	NA	NA	NA	NA	NA	NA	NA	NA	NA	18.0813	NA	NA	NA	NA	NA	21.2758	NA	NA	NA	NA	NA	NA	NA	NA	NA	16.6694	NA	NA	NA	NA	NA	31.7335	24.6043	NA	NA	20.5053
C3N-02768-N	Normal	PDA	NA	16.7263	NA	NA	NA	NA	NA	NA	NA	NA	NA	NA	NA	NA	NA	16.7263	NA	NA	NA	NA	NA	NA	NA	NA	NA	NA	NA	NA	NA	NA	NA	NA	NA	NA	NA	NA	NA	NA	NA	NA	NA	NA	31.3979	23.7368	NA	NA	NA
C3N-02768-T	Tumor	PDA	NA	18.9021	NA	NA	NA	NA	NA	NA	NA	NA	NA	NA	NA	NA	NA	18.9021	NA	NA	NA	NA	NA	NA	NA	NA	NA	NA	NA	NA	NA	NA	NA	NA	NA	NA	NA	NA	NA	NA	NA	NA	NA	NA	31.5054	25.0171	NA	NA	NA
C3N-02769-T	Tumor	GBM	NA	19.1516	NA	NA	NA	NA	NA	NA	NA	NA	NA	NA	NA	NA	NA	19.3485	NA	NA	NA	NA	19.6534	NA	NA	NA	NA	NA	19.4996	18.1049	NA	NA	NA	NA	NA	NA	NA	NA	NA	NA	NA	NA	NA	NA	32.9145	25.6448	NA	NA	NA
C3N-02770-T	Tumor	GBM	NA	18.4856	NA	NA	NA	NA	NA	NA	NA	NA	NA	NA	NA	NA	NA	NA	NA	15.4828	NA	NA	NA	NA	NA	NA	NA	NA	21.443	18.5309	NA	NA	NA	NA	NA	NA	NA	NA	NA	NA	NA	NA	NA	NA	32.8788	25.7837	NA	NA	NA
C3N-02782-T	Tumor	GBM	19.139	17.376	-0.70602	NA	NA	NA	NA	19.9733	NA	NA	NA	NA	NA	NA	NA	19.0283	NA	15.1224	NA	NA	NA	17.8332	NA	NA	NA	16.9612	19.4298	18.7427	NA	NA	NA	14.0862	NA	NA	NA	NA	15.2068	NA	NA	NA	NA	NA	33.2052	25.5091	NA	16.5559	NA
C3N-02783-T	Tumor	GBM	NA	17.7261	NA	NA	NA	NA	NA	NA	NA	NA	NA	NA	NA	NA	NA	NA	NA	14.9207	NA	NA	NA	NA	NA	NA	NA	NA	20.2786	17.9789	NA	NA	NA	NA	NA	NA	NA	NA	NA	NA	NA	NA	NA	NA	33.5355	24.0288	NA	NA	NA
C3N-02784-T	Tumor	GBM	19.2791	20.1309	2.04066	NA	NA	NA	NA	20.5061	NA	NA	NA	NA	NA	NA	NA	21.142	NA	NA	NA	NA	21.4642	NA	NA	NA	NA	18.1671	22.3786	NA	NA	NA	NA	NA	NA	NA	NA	NA	NA	17.1274	NA	NA	NA	NA	33.7765	25.9623	NA	NA	NA
C3N-02785-T	Tumor	GBM	NA	19.1447	NA	NA	NA	NA	NA	NA	NA	NA	NA	NA	NA	NA	NA	18.0781	NA	NA	NA	NA	NA	NA	NA	NA	NA	NA	20.2136	19.1423	NA	NA	NA	NA	NA	NA	NA	NA	NA	NA	NA	NA	NA	NA	32.5837	25.5088	NA	NA	NA
C3N-02786-T	Tumor	GBM	NA	20.1797	NA	NA	NA	NA	NA	NA	NA	NA	NA	NA	NA	NA	NA	20.9884	NA	NA	NA	NA	21.2537	NA	NA	NA	NA	NA	19.9029	18.5738	NA	NA	NA	NA	NA	NA	NA	NA	NA	NA	NA	NA	NA	NA	33.1495	25.8285	NA	NA	NA
C3N-02788-T	Tumor	GBM	NA	17.6947	NA	NA	13.674	NA	NA	19.6592	NA	NA	NA	NA	NA	NA	NA	NA	NA	NA	NA	NA	NA	NA	NA	NA	NA	NA	19.083	18.3624	NA	NA	NA	NA	NA	NA	NA	NA	NA	NA	NA	NA	NA	NA	31.8268	24.7307	NA	NA	NA
C3N-02925-T	Tumor	HNSCC	19.2863	18.0006	-0.0901128	NA	NA	14.9519	NA	20.7707	NA	NA	NA	NA	NA	NA	NA	17.3303	NA	NA	NA	NA	NA	NA	NA	16.9023	NA	NA	21.1578	18.3867	NA	NA	NA	NA	NA	NA	NA	NA	NA	NA	NA	NA	NA	16.5042	31.3	24.9445	NA	NA	NA
C3N-02940-T	Tumor	PDA	19.1658	16.5861	-1.49745	15.9558	NA	NA	NA	NA	NA	NA	NA	NA	NA	NA	NA	18.5648	NA	16.3367	NA	NA	NA	NA	NA	NA	NA	NA	18.9925	15.933	NA	NA	NA	16.8287	NA	NA	NA	NA	NA	13.4913	NA	NA	NA	NA	31.3203	24.3362	NA	NA	19.1973
C3N-02944-N	Normal	PDA	NA	18.8965	NA	NA	NA	NA	NA	NA	NA	NA	NA	NA	NA	NA	NA	16.1957	NA	NA	NA	NA	NA	NA	NA	NA	NA	NA	NA	NA	NA	NA	NA	NA	NA	NA	NA	NA	NA	NA	NA	21.5973	NA	NA	30.369	23.1772	NA	NA	19.8571
C3N-02944-T	Tumor	PDA	NA	19.6451	NA	NA	NA	NA	NA	NA	NA	NA	NA	NA	NA	NA	NA	18.7174	NA	NA	NA	NA	NA	NA	NA	NA	NA	NA	NA	NA	NA	NA	NA	NA	NA	NA	NA	NA	NA	NA	NA	20.5728	NA	NA	32.0756	24.396	NA	NA	17.3813
C3N-02971-T	Tumor	PDA	NA	19.4026	NA	NA	NA	NA	NA	NA	NA	NA	NA	NA	NA	NA	NA	18.7956	NA	NA	NA	NA	NA	NA	NA	NA	NA	NA	NA	NA	NA	NA	NA	NA	NA	NA	NA	NA	NA	NA	NA	20.0097	NA	NA	32.3272	24.017	NA	NA	NA
C3N-02998-T	Tumor	PDA	NA	18.2017	NA	NA	NA	NA	NA	18.0943	NA	NA	NA	NA	NA	NA	NA	17.8212	NA	NA	NA	NA	NA	NA	NA	NA	NA	NA	18.6895	NA	NA	NA	NA	NA	NA	NA	NA	NA	NA	NA	NA	NA	NA	NA	32.4133	23.9603	NA	NA	NA
C3N-03000-T	Tumor	PDA	NA	18.2918	NA	NA	NA	NA	NA	18.1821	NA	NA	NA	NA	NA	NA	NA	NA	NA	NA	NA	NA	NA	NA	NA	NA	NA	NA	18.4014	NA	NA	NA	NA	NA	NA	NA	NA	NA	NA	NA	NA	NA	NA	NA	32.4789	24.3433	NA	NA	NA
C3N-03006-T	Tumor	PDA	NA	17.0157	NA	14.8915	NA	NA	NA	18.2603	NA	NA	NA	NA	NA	NA	NA	18.0935	NA	NA	NA	NA	16.8174	NA	NA	NA	NA	NA	NA	NA	NA	NA	NA	NA	NA	NA	NA	NA	NA	NA	NA	NA	NA	NA	31.9401	23.7118	NA	NA	NA
C3N-03007-T	Tumor	PDA	NA	19.6907	NA	NA	NA	NA	NA	NA	NA	NA	NA	NA	NA	NA	NA	18.3395	NA	NA	NA	NA	NA	NA	NA	NA	NA	NA	NA	NA	NA	NA	NA	NA	NA	NA	NA	NA	NA	NA	NA	21.042	NA	NA	32.6892	24.0849	NA	NA	17.6272
C3N-03008-N	Normal	HNSCC	21.6333	17.7498	-0.479062	NA	NA	NA	NA	19.6537	NA	NA	NA	NA	NA	NA	NA	16.4799	NA	NA	NA	NA	NA	NA	NA	NA	NA	NA	20.4993	NA	NA	NA	NA	14.3665	NA	NA	NA	NA	NA	NA	NA	NA	NA	NA	32.0991	25.0619	NA	NA	20.6458
C3N-03008-T	Tumor	HNSCC	19.7595	18.1451	0.0265916	NA	NA	NA	NA	20.5207	NA	NA	NA	NA	NA	NA	NA	16.283	NA	NA	NA	NA	NA	NA	NA	NA	NA	NA	20.8819	NA	NA	NA	NA	14.8949	NA	NA	NA	NA	NA	NA	NA	NA	NA	NA	31.5399	25.7143	NA	NA	20.273
C3N-03009-T	Tumor	HNSCC	NA	18.3021	NA	16.5322	NA	15.1981	NA	21.1684	NA	NA	NA	NA	NA	NA	NA	NA	NA	NA	NA	NA	NA	NA	NA	NA	18.4528	NA	21.3114	18.8172	NA	NA	NA	18.646	NA	NA	NA	NA	17.4228	18.8562	NA	NA	NA	16.6154	31.2239	26.1448	NA	NA	20.3058
C3N-03011-N	Normal	HNSCC	17.7194	17.4078	-0.590593	NA	15.4749	NA	14.6154	19.798	NA	NA	NA	NA	NA	NA	NA	NA	NA	NA	NA	NA	17.1426	NA	NA	NA	18.0028	NA	20.8464	17.8197	NA	NA	NA	18.286	NA	NA	NA	NA	16.9969	16.9111	NA	NA	NA	15.5919	32.3379	25.4358	NA	NA	20.5486
C3N-03011-T	Tumor	HNSCC	20.7081	18.3056	0.131158	NA	15.1261	NA	15.1329	21.3876	NA	NA	NA	NA	NA	NA	NA	NA	NA	NA	NA	NA	19.1144	NA	NA	NA	18.5897	NA	21.5317	18.6578	NA	NA	NA	19.2816	NA	NA	NA	NA	17.4456	18.1325	NA	NA	NA	16.9614	31.541	26.7658	NA	NA	21.5005
C3N-03012-N	Normal	HNSCC	NA	18.4328	NA	NA	NA	NA	NA	19.5376	NA	NA	NA	NA	NA	NA	NA	NA	NA	NA	NA	NA	16.8873	NA	NA	NA	NA	NA	20.6787	NA	NA	NA	NA	NA	NA	NA	NA	NA	16.6276	NA	NA	NA	NA	NA	31.8667	24.9595	NA	NA	20.4687
C3N-03012-T	Tumor	HNSCC	NA	19.3211	NA	NA	NA	NA	NA	20.8698	NA	NA	NA	NA	NA	NA	NA	NA	NA	NA	NA	NA	18.8995	NA	NA	NA	NA	NA	20.8462	NA	NA	NA	NA	NA	NA	NA	NA	NA	16.6688	NA	NA	NA	NA	NA	31.3003	25.1117	NA	NA	20.4605
C3N-03013-N	Normal	HNSCC	18.9564	17.6409	-0.430289	NA	NA	NA	NA	NA	NA	NA	NA	NA	NA	NA	NA	15.5969	NA	14.6538	NA	NA	17.2723	NA	NA	NA	NA	NA	20.6307	18.1913	NA	NA	NA	18.428	NA	NA	NA	NA	16.7454	NA	NA	21.6234	NA	15.6267	32.4566	25.3655	NA	NA	19.8241
C3N-03013-T	Tumor	HNSCC	19.3734	17.8953	-0.200491	NA	NA	NA	NA	NA	NA	NA	NA	NA	NA	NA	NA	16.5732	NA	14.7677	NA	NA	18.7038	NA	NA	NA	NA	NA	21.1398	18.0962	NA	NA	NA	18.6311	NA	NA	NA	NA	16.424	17.5732	NA	21.1014	NA	15.9428	31.6957	25.22	NA	NA	20.4058
C3N-03015-N	Normal	HNSCC	NA	18.4146	NA	NA	NA	NA	NA	19.3424	NA	NA	NA	NA	NA	NA	NA	NA	NA	NA	NA	NA	17.0552	NA	NA	NA	NA	NA	20.4127	NA	NA	NA	NA	NA	NA	NA	NA	NA	16.848	NA	NA	NA	NA	NA	31.7739	24.6964	NA	NA	20.1943
C3N-03015-T	Tumor	HNSCC	NA	19.6066	NA	NA	NA	NA	NA	20.9505	NA	NA	NA	NA	NA	NA	NA	NA	NA	NA	NA	NA	18.576	NA	NA	NA	NA	NA	22.0089	NA	NA	NA	NA	NA	NA	NA	NA	NA	16.8908	NA	NA	NA	NA	NA	31.0104	25.9366	NA	NA	21.5759
C3N-03027-N	Normal	HNSCC	17.6586	17.8134	-0.181356	NA	NA	NA	NA	19.6734	NA	NA	NA	NA	NA	NA	NA	16.2198	NA	NA	NA	NA	17.0819	NA	NA	NA	NA	NA	20.7372	18.2678	NA	NA	NA	NA	NA	NA	NA	NA	16.9733	17.6878	NA	NA	NA	15.8663	31.7823	25.546	NA	11.47	20.3314
C3N-03027-T	Tumor	HNSCC	19.2606	18.6527	0.56358	NA	NA	NA	NA	20.6478	NA	NA	NA	NA	NA	NA	NA	17.4639	NA	NA	NA	NA	19.3979	NA	NA	NA	NA	NA	21.1396	18.6434	NA	NA	NA	NA	NA	NA	NA	NA	17.1715	18.0176	NA	NA	NA	16.7403	31.6446	26.0744	NA	11.1344	20.5428
C3N-03028-N	Normal	HNSCC	21.6828	17.5874	-0.644442	NA	NA	NA	NA	19.5229	NA	NA	NA	NA	NA	NA	NA	15.8284	NA	NA	NA	NA	NA	NA	NA	NA	NA	NA	20.8043	NA	NA	NA	NA	14.1939	NA	NA	NA	NA	NA	NA	NA	NA	NA	NA	31.9239	25.2401	NA	NA	20.4908
C3N-03028-T	Tumor	HNSCC	20.0008	19.2501	1.1173	NA	NA	NA	NA	21.6291	NA	NA	NA	NA	NA	NA	NA	17.8537	NA	NA	NA	NA	NA	NA	NA	NA	NA	NA	22.0019	NA	NA	NA	NA	15.5155	NA	NA	NA	NA	NA	NA	NA	NA	NA	NA	31.4328	26.0701	NA	NA	20.8217
C3N-03039-T	Tumor	PDA	NA	16.682	NA	NA	NA	NA	NA	NA	NA	NA	NA	NA	NA	NA	NA	17.9703	NA	NA	NA	NA	NA	NA	NA	NA	NA	NA	NA	15.3937	NA	NA	NA	NA	NA	NA	NA	NA	NA	NA	NA	NA	NA	NA	31.5539	24.0151	NA	NA	NA
C3N-03042-T	Tumor	HNSCC	19.3528	18.0468	-0.0477715	NA	NA	NA	NA	20.0239	NA	NA	NA	NA	NA	NA	NA	16.3373	NA	NA	NA	NA	NA	NA	NA	NA	17.9027	NA	21.5006	17.6764	NA	NA	NA	17.0972	NA	NA	NA	NA	NA	NA	NA	NA	NA	15.7896	30.8753	25.1767	NA	NA	20.3565
C3N-03045-N	Normal	HNSCC	NA	18.2534	NA	NA	NA	NA	NA	19.2843	NA	NA	NA	NA	NA	NA	NA	NA	NA	NA	NA	NA	NA	NA	NA	NA	NA	NA	20.9658	17.8442	NA	NA	NA	19.4429	NA	NA	NA	NA	16.8888	NA	NA	NA	NA	15.0947	32.061	24.6938	NA	NA	20.2952
C3N-03045-T	Tumor	HNSCC	NA	18.7393	NA	NA	NA	NA	NA	20.8429	NA	NA	NA	NA	NA	NA	NA	NA	NA	NA	NA	NA	NA	NA	NA	NA	NA	NA	20.9572	18.1907	NA	NA	NA	18.7915	NA	NA	NA	NA	16.8831	NA	NA	NA	NA	16.7705	30.4022	25.8928	NA	NA	21.3938
C3N-03051-N	Normal	LSCC	20.4923	17.0781	-1.08362	NA	NA	NA	NA	19.8329	NA	NA	NA	NA	NA	NA	NA	19.34	NA	NA	NA	NA	NA	NA	NA	NA	NA	NA	16.5025	17.8294	NA	NA	NA	11.6002	NA	NA	NA	NA	17.3634	NA	NA	NA	NA	NA	32.7159	24.9606	NA	NA	20.061
C3N-03051-T	Tumor	LSCC	23.0046	19.2756	0.96593	NA	NA	NA	NA	22.0233	NA	NA	NA	NA	NA	NA	NA	22.4041	NA	NA	NA	NA	NA	NA	NA	NA	NA	NA	18.7572	20.7169	NA	NA	NA	13.9863	NA	NA	NA	NA	17.7657	NA	NA	NA	NA	NA	31.1394	26.3895	NA	NA	19.9658
C3N-03061-N	Normal	PDA	18.1665	16.6693	-1.35543	NA	NA	NA	NA	NA	NA	NA	NA	NA	NA	NA	NA	16.6693	NA	NA	NA	NA	NA	NA	NA	NA	NA	NA	NA	NA	NA	NA	NA	NA	NA	NA	NA	NA	NA	NA	NA	NA	NA	NA	30.6695	23.4715	NA	NA	17.381
C3N-03061-T	Tumor	PDA	19.0783	19.0381	0.959712	NA	NA	NA	NA	NA	NA	NA	NA	NA	NA	NA	NA	19.0381	NA	NA	NA	NA	NA	NA	NA	NA	NA	NA	NA	NA	NA	NA	NA	NA	NA	NA	NA	NA	NA	NA	NA	NA	NA	NA	31.7237	24.1359	NA	NA	18.0205
C3N-03069-N	Normal	PDA	NA	16.7737	NA	14.861	NA	NA	NA	18.4041	NA	NA	NA	NA	NA	NA	NA	17.3064	NA	NA	NA	NA	16.5232	NA	NA	NA	NA	NA	NA	NA	NA	NA	NA	NA	NA	NA	NA	NA	NA	NA	NA	NA	NA	NA	31.1221	24.1605	NA	NA	NA
C3N-03069-T	Tumor	PDA	NA	17.2821	NA	15.7455	NA	NA	NA	18.8325	NA	NA	NA	NA	NA	NA	NA	17.7104	NA	NA	NA	NA	16.8401	NA	NA	NA	NA	NA	NA	NA	NA	NA	NA	NA	NA	NA	NA	NA	NA	NA	NA	NA	NA	NA	32.6031	24.1203	NA	NA	NA
C3N-03070-T	Tumor	GBM	NA	18.9415	NA	NA	NA	NA	NA	20.0235	NA	NA	NA	NA	NA	NA	NA	NA	NA	NA	NA	NA	NA	18.3082	NA	NA	NA	17.9776	21.8199	18.8908	NA	NA	NA	NA	NA	NA	NA	NA	NA	NA	16.6288	NA	NA	NA	32.1204	25.7028	NA	NA	20.5637
C3N-03072-N	Normal	LSCC	20.5233	18.6802	0.516665	NA	NA	NA	NA	19.0122	NA	NA	NA	NA	NA	NA	NA	18.5739	NA	18.8255	NA	NA	NA	NA	NA	NA	18.4517	NA	19.6336	18.6511	NA	NA	NA	NA	NA	NA	NA	NA	17.6135	NA	NA	NA	NA	NA	32.322	25.0758	NA	NA	NA
C3N-03072-T	Tumor	LSCC	22.5013	20.7086	2.42854	NA	NA	NA	NA	22.1509	NA	NA	NA	NA	NA	NA	NA	22.1006	NA	20.1131	NA	NA	NA	NA	NA	NA	20.1692	NA	21.048	20.5658	NA	NA	NA	NA	NA	NA	NA	NA	18.8123	NA	NA	NA	NA	NA	31.3359	26.7031	NA	NA	NA
C3N-03076-N	Normal	LSCC	20.02	18.4884	0.35447	NA	NA	NA	NA	NA	NA	NA	NA	NA	NA	NA	NA	18.9825	NA	20.5325	NA	NA	17.809	NA	NA	NA	18.3544	NA	16.8206	18.4312	NA	NA	NA	NA	NA	NA	NA	NA	NA	NA	NA	NA	NA	NA	32.1892	25.5818	NA	NA	20.7407
C3N-03076-T	Tumor	LSCC	21.9169	19.5583	1.31274	NA	NA	NA	NA	NA	NA	NA	NA	NA	NA	NA	NA	21.1393	NA	19.3009	NA	NA	19.7572	NA	NA	NA	19.1761	NA	17.8458	20.1308	NA	NA	NA	NA	NA	NA	NA	NA	NA	NA	NA	NA	NA	NA	31.4676	26.6055	NA	NA	19.7728
C3N-03086-T	Tumor	PDA	19.4111	16.1869	-1.91115	NA	NA	NA	NA	18.1796	NA	NA	NA	NA	NA	NA	NA	17.395	NA	NA	NA	NA	NA	NA	NA	NA	NA	NA	18.6202	15.7317	NA	NA	NA	16.3597	NA	NA	NA	NA	14.3476	12.6743	NA	NA	NA	NA	32.3768	24.244	NA	NA	18.1235
C3N-03088-T	Tumor	GBM	NA	17.5816	NA	NA	NA	NA	NA	19.093	NA	NA	NA	NA	NA	NA	NA	NA	NA	NA	NA	NA	NA	16.9563	NA	NA	NA	15.9619	20.0299	17.5033	NA	NA	NA	NA	NA	NA	NA	NA	NA	NA	15.945	NA	NA	NA	33.1797	24.7309	NA	NA	19.5396
C3N-03092-N	Normal	LSCC	20.7474	18.4564	0.279679	NA	NA	NA	NA	19.7388	NA	NA	NA	NA	NA	NA	NA	17.9113	NA	NA	NA	NA	17.806	NA	NA	NA	NA	NA	19.6256	18.7376	NA	NA	NA	NA	NA	NA	NA	NA	16.9191	NA	NA	NA	NA	NA	32.0968	24.9938	NA	19.1931	21.1028
C3N-03092-T	Tumor	LSCC	22.0656	20.2831	2.02876	NA	NA	NA	NA	21.8059	NA	NA	NA	NA	NA	NA	NA	21.3782	NA	NA	NA	NA	19.4276	NA	NA	NA	NA	NA	20.6952	20.1515	NA	NA	NA	NA	NA	NA	NA	NA	18.2404	NA	NA	NA	NA	NA	31.551	26.432	NA	19.2216	20.9966
C3N-03093-N	Normal	LSCC	20.6643	17.9709	-0.200912	NA	15.9738	NA	NA	19.2086	NA	NA	NA	NA	NA	NA	NA	18.2484	NA	NA	NA	NA	18.0008	NA	NA	NA	17.8226	NA	19.3158	18.9143	NA	NA	NA	17.4468	NA	NA	NA	NA	16.8071	NA	NA	NA	NA	NA	32.0197	25.5508	NA	18.4173	20.0208
C3N-03093-T	Tumor	LSCC	21.9768	19.7838	1.53469	NA	16.5171	NA	NA	21.7328	NA	NA	NA	NA	NA	NA	NA	21.8709	NA	NA	NA	NA	20.1437	NA	NA	NA	19.4507	NA	21.1174	20.4574	NA	NA	NA	17.9589	NA	NA	NA	NA	18.8056	NA	NA	NA	NA	NA	31.3403	26.0215	NA	18.8581	20.1956
C3N-03173-N	Normal	PDA	NA	NA	NA	NA	NA	NA	NA	NA	NA	NA	NA	NA	NA	NA	NA	NA	NA	NA	NA	NA	NA	NA	NA	NA	NA	NA	NA	NA	NA	NA	NA	NA	NA	NA	NA	NA	NA	NA	NA	NA	NA	NA	31.6031	24.6374	NA	NA	NA
C3N-03173-T	Tumor	PDA	NA	NA	NA	NA	NA	NA	NA	NA	NA	NA	NA	NA	NA	NA	NA	NA	NA	NA	NA	NA	NA	NA	NA	NA	NA	NA	NA	NA	NA	NA	NA	NA	NA	NA	NA	NA	NA	NA	NA	NA	NA	NA	31.8584	23.6615	NA	NA	NA
C3N-03180-T	Tumor	GBM	NA	18.5385	NA	NA	NA	NA	NA	NA	NA	NA	NA	NA	NA	NA	NA	NA	NA	NA	NA	NA	NA	NA	NA	NA	NA	NA	NA	18.5385	NA	NA	NA	NA	NA	NA	NA	NA	NA	NA	NA	NA	NA	NA	32.4697	24.2793	NA	NA	NA
C3N-03182-T	Tumor	GBM	19.193	19.3017	1.21651	NA	NA	NA	NA	20.6365	NA	NA	NA	NA	NA	NA	NA	20.3946	NA	NA	NA	NA	20.1704	NA	NA	NA	NA	16.6963	21.1608	NA	NA	NA	NA	NA	NA	NA	NA	NA	NA	16.7516	NA	NA	NA	NA	32.2874	26.5925	NA	NA	NA
C3N-03183-T	Tumor	GBM	18.0741	16.8299	-1.18935	NA	NA	NA	NA	NA	NA	NA	NA	NA	14.3277	NA	NA	NA	NA	NA	NA	NA	NA	NA	NA	NA	NA	15.5921	18.9794	18.4205	NA	NA	NA	NA	NA	NA	NA	NA	NA	NA	NA	NA	NA	NA	33.0792	25.4883	NA	NA	19.3192
C3N-03184-T	Tumor	GBM	NA	19.7605	NA	NA	NA	NA	NA	NA	NA	NA	NA	NA	NA	NA	NA	NA	NA	NA	NA	NA	NA	NA	NA	NA	NA	NA	NA	19.7605	NA	NA	NA	NA	NA	NA	NA	NA	NA	NA	NA	NA	NA	NA	32.4011	26.0103	NA	NA	NA
C3N-03186-T	Tumor	GBM	18.1218	18.5433	0.521203	NA	NA	NA	NA	19.7351	NA	NA	NA	NA	NA	NA	NA	19.1864	NA	NA	NA	NA	18.936	NA	NA	NA	NA	15.6796	20.8934	NA	NA	NA	NA	NA	NA	NA	NA	NA	NA	16.8292	NA	NA	NA	NA	32.3805	25.0261	NA	NA	NA
C3N-03188-T	Tumor	GBM	18.3371	16.7085	-1.32631	NA	NA	NA	NA	NA	NA	NA	NA	NA	13.8366	NA	NA	NA	NA	NA	NA	NA	NA	NA	NA	NA	NA	16.1687	18.8997	17.9288	NA	NA	NA	NA	NA	NA	NA	NA	NA	NA	NA	NA	NA	NA	32.865	24.8727	NA	NA	18.756
C3N-03190-T	Tumor	PDA	19.2439	16.0369	-2.05125	15.9024	NA	NA	NA	18.4801	NA	NA	NA	NA	NA	NA	NA	18.0533	NA	NA	NA	NA	17.1462	NA	NA	NA	NA	NA	18.4997	13.7089	NA	13.5069	NA	NA	NA	NA	NA	NA	NA	12.9979	NA	NA	NA	NA	31.7123	24.1254	NA	NA	17.8463
C3N-03204-N	Normal	LSCC	20.8485	18.6601	0.477384	NA	NA	NA	NA	NA	NA	NA	NA	NA	NA	NA	NA	19.3852	NA	NA	NA	NA	17.467	NA	NA	NA	18.4009	NA	19.7991	18.2481	NA	NA	NA	NA	NA	NA	NA	NA	NA	NA	NA	NA	NA	NA	32.2418	25.1428	NA	18.1742	20.5419
C3N-03204-T	Tumor	LSCC	22.3375	20.6764	2.40601	NA	NA	NA	NA	NA	NA	NA	NA	NA	NA	NA	NA	21.5501	NA	NA	NA	NA	20.7716	NA	NA	NA	18.8566	NA	21.4209	20.7828	NA	NA	NA	NA	NA	NA	NA	NA	NA	NA	NA	NA	NA	NA	30.6616	26.4155	NA	19.6822	20.4721
C3N-03211-N	Normal	PDA	20.6186	15.8978	-2.27138	15.7156	NA	NA	NA	NA	NA	NA	NA	NA	NA	NA	NA	16.4111	NA	16.4874	NA	NA	NA	NA	NA	NA	NA	NA	18.0864	14.1989	NA	NA	NA	16.5162	NA	NA	NA	NA	NA	13.8687	NA	NA	NA	NA	30.7329	23.9174	NA	NA	17.5244
C3N-03211-T	Tumor	PDA	19.6007	15.6758	-2.43338	14.8244	NA	NA	NA	NA	NA	NA	NA	NA	NA	NA	NA	17.1089	NA	15.488	NA	NA	NA	NA	NA	NA	NA	NA	18.0685	15.1962	NA	NA	NA	16.2996	NA	NA	NA	NA	NA	12.745	NA	NA	NA	NA	32.1087	23.9804	NA	NA	17.6124
C3N-03226-T	Tumor	HNSCC	NA	17.0832	NA	NA	NA	NA	14.6243	19.7872	NA	NA	NA	NA	NA	NA	NA	NA	NA	NA	NA	NA	NA	15.6614	NA	16.844	NA	NA	17.84	17.9598	NA	NA	NA	NA	NA	NA	NA	NA	NA	18.4214	NA	NA	NA	15.5275	31.3957	25.6	NA	NA	20.2112
C3N-03424-N	Normal	LSCC	20.2289	18.1476	0.00145502	NA	NA	16.159	NA	19.1617	NA	NA	NA	NA	NA	NA	NA	16.3895	NA	19.3561	NA	NA	NA	NA	NA	NA	18.7031	NA	NA	18.8559	NA	NA	NA	18.4082	NA	NA	NA	NA	NA	NA	NA	NA	NA	NA	32.2484	24.8907	NA	NA	20.6369
C3N-03424-T	Tumor	LSCC	20.893	18.9823	0.796961	NA	NA	16.4006	NA	20.4709	NA	NA	NA	NA	NA	NA	NA	20.3626	NA	19.4048	NA	NA	NA	NA	NA	NA	19.1281	NA	NA	19.5906	NA	NA	NA	17.5182	NA	NA	NA	NA	NA	NA	NA	NA	NA	NA	31.5181	25.7696	NA	NA	19.7252
C3N-03425-N	Normal	LSCC	19.7589	18.2071	0.0886154	NA	NA	NA	NA	NA	NA	NA	NA	NA	NA	NA	NA	17.61	NA	18.9976	NA	NA	17.3055	NA	NA	NA	NA	NA	19.0599	18.618	NA	NA	NA	NA	NA	NA	NA	NA	17.6516	NA	NA	NA	NA	NA	32.0055	25.1039	NA	NA	20.4026
C3N-03425-T	Tumor	LSCC	22.4994	20.3195	2.03963	NA	NA	NA	NA	NA	NA	NA	NA	NA	NA	NA	NA	21.5897	NA	19.9501	NA	NA	20.3687	NA	NA	NA	NA	NA	21.292	20.7025	NA	NA	NA	NA	NA	NA	NA	NA	18.0142	NA	NA	NA	NA	NA	30.6975	26.7507	NA	NA	20.5901
C3N-03426-N	Normal	PDA	NA	16.3642	NA	NA	NA	NA	NA	NA	NA	NA	NA	NA	NA	NA	NA	17.5674	NA	NA	NA	NA	NA	NA	NA	NA	NA	NA	NA	15.161	NA	NA	NA	NA	NA	NA	NA	NA	NA	NA	NA	NA	NA	NA	32.0892	23.8209	NA	NA	NA
C3N-03426-T	Tumor	PDA	NA	18.1134	NA	NA	NA	NA	NA	NA	NA	NA	NA	NA	NA	NA	NA	19.3577	NA	NA	NA	NA	NA	NA	NA	NA	NA	NA	NA	16.8692	NA	NA	NA	NA	NA	NA	NA	NA	NA	NA	NA	NA	NA	NA	31.4488	24.4719	NA	NA	NA
C3N-03428-T	Tumor	PDA	18.6996	16.6428	-1.41332	NA	NA	NA	NA	18.8194	NA	NA	NA	NA	NA	NA	NA	19.3718	NA	NA	NA	NA	NA	NA	NA	NA	NA	NA	19.134	16.1771	NA	NA	NA	16.2997	NA	NA	NA	NA	13.8357	12.8618	NA	NA	NA	NA	32.0236	24.565	NA	NA	17.8041
C3N-03430-T	Tumor	PDA	NA	19.5357	NA	NA	NA	NA	NA	NA	NA	NA	NA	NA	NA	NA	NA	19.5357	NA	NA	NA	NA	NA	NA	NA	NA	NA	NA	NA	NA	NA	NA	NA	NA	NA	NA	NA	NA	NA	NA	NA	NA	NA	NA	32.0486	24.3795	NA	NA	NA
C3N-03433-T	Tumor	HNSCC	19.8098	19.2226	1.10112	NA	NA	NA	NA	NA	NA	NA	NA	NA	NA	NA	NA	NA	NA	NA	NA	NA	NA	NA	NA	NA	18.7891	NA	21.8789	18.5439	NA	NA	NA	NA	NA	NA	NA	NA	NA	NA	17.6787	NA	NA	NA	31.2989	26.1483	NA	NA	21.5865
C3N-03439-T	Tumor	PDA	NA	18.1242	NA	NA	NA	NA	NA	NA	NA	NA	NA	NA	NA	NA	NA	18.1242	NA	NA	NA	NA	NA	NA	NA	NA	NA	NA	NA	NA	NA	NA	NA	NA	NA	NA	NA	NA	NA	NA	NA	NA	NA	NA	32.0476	23.8797	NA	NA	NA
C3N-03440-N	Normal	PDA	18.585	18.0828	0.0334383	NA	NA	NA	NA	NA	NA	NA	NA	NA	NA	NA	NA	18.0828	NA	NA	NA	NA	NA	NA	NA	NA	NA	NA	NA	NA	NA	NA	NA	NA	NA	NA	NA	NA	NA	NA	NA	NA	NA	NA	30.7834	23.725	NA	NA	17.0027
C3N-03440-T	Tumor	PDA	19.1235	18.6207	0.539653	NA	NA	NA	NA	NA	NA	NA	NA	NA	NA	NA	NA	18.6207	NA	NA	NA	NA	NA	NA	NA	NA	NA	NA	NA	NA	NA	NA	NA	NA	NA	NA	NA	NA	NA	NA	NA	NA	NA	NA	31.2279	24.2085	NA	NA	16.8584
C3N-03441-N	Normal	LSCC	20.4547	17.4753	-0.684174	NA	NA	16.5291	NA	19.2859	NA	NA	NA	NA	NA	NA	NA	NA	NA	NA	NA	NA	NA	NA	NA	NA	18.5263	NA	19.0459	19.1611	NA	NA	NA	12.3036	NA	NA	NA	NA	NA	NA	NA	NA	NA	NA	31.7428	25.3015	NA	NA	20.6161
C3N-03441-T	Tumor	LSCC	21.1659	18.2553	0.0539666	NA	NA	16.8248	NA	20.8608	NA	NA	NA	NA	NA	NA	NA	NA	NA	NA	NA	NA	NA	NA	NA	NA	18.7025	NA	20.3463	19.7547	NA	NA	NA	13.0431	NA	NA	NA	NA	NA	NA	NA	NA	NA	NA	31.5372	26.3601	NA	NA	19.7295
C3N-03456-T	Tumor	HNSCC	20.1643	17.9213	-0.221086	NA	NA	NA	NA	NA	NA	NA	NA	NA	NA	NA	NA	17.0227	NA	15.0564	NA	NA	17.9873	NA	NA	NA	NA	NA	21.2592	18.3537	NA	NA	NA	19.1925	NA	NA	NA	NA	16.6895	18.6333	NA	18.9107	NA	16.1077	31.0721	26.1921	NA	NA	20.2375
C3N-03457-T	Tumor	HNSCC	NA	19.2257	NA	NA	NA	NA	NA	NA	NA	NA	NA	NA	NA	NA	NA	NA	NA	NA	NA	NA	NA	NA	NA	NA	18.5473	NA	22.4133	18.9758	NA	NA	NA	NA	NA	NA	NA	NA	NA	NA	16.9665	NA	NA	NA	31.4635	24.9692	NA	NA	20.1965
C3N-03458-T	Tumor	HNSCC	18.9943	18.3599	0.286401	NA	NA	NA	NA	20.2846	NA	NA	NA	NA	NA	NA	NA	NA	NA	15.0528	NA	NA	NA	NA	NA	NA	18.5251	NA	21.043	17.9941	NA	NA	NA	NA	NA	NA	NA	NA	NA	NA	NA	19.6863	NA	15.9332	30.6967	25.255	NA	NA	19.7471
C3N-03473-T	Tumor	GBM	19.392	18.229	0.132074	NA	NA	NA	NA	NA	NA	16.0024	NA	NA	NA	NA	NA	19.8203	NA	NA	NA	NA	NA	NA	NA	NA	NA	17.797	18.369	20.2484	NA	NA	NA	NA	NA	NA	NA	NA	NA	17.1368	NA	NA	NA	NA	33.0302	26.075	NA	NA	20.097
C3N-03486-N	Normal	LSCC	22.0266	18.3546	0.102557	NA	NA	NA	NA	NA	NA	NA	NA	NA	NA	NA	NA	18.2068	NA	NA	NA	NA	18.0217	NA	NA	NA	18.1807	NA	19.5676	18.8261	NA	NA	NA	NA	NA	NA	NA	NA	17.325	NA	NA	NA	NA	NA	31.8628	25.1505	NA	NA	20.4801
C3N-03486-T	Tumor	LSCC	21.3292	20.4294	2.21843	NA	NA	NA	NA	NA	NA	NA	NA	NA	NA	NA	NA	21.3352	NA	NA	NA	NA	19.8527	NA	NA	NA	19.7169	NA	21.248	21.5666	NA	NA	NA	NA	NA	NA	NA	NA	18.8571	NA	NA	NA	NA	NA	31.1263	26.8243	NA	NA	21.5682
C3N-03487-T	Tumor	HNSCC	18.6193	17.0435	-1.00791	NA	15.1103	NA	NA	19.761	NA	NA	NA	NA	NA	NA	NA	NA	NA	NA	NA	NA	NA	NA	NA	NA	18.348	NA	17.4953	17.8522	NA	NA	NA	18.7082	13.6312	NA	NA	NA	16.6546	17.3956	16.4535	NA	NA	16.0683	31.8461	25.2375	NA	11.3535	NA
C3N-03488-N	Normal	HNSCC	19.5117	18.4589	0.354934	NA	NA	NA	NA	20.3602	NA	NA	NA	NA	NA	NA	NA	17.6684	NA	NA	NA	NA	NA	NA	NA	NA	18.5056	NA	21.0847	18.3503	NA	NA	NA	NA	NA	NA	NA	NA	16.9157	NA	16.3272	NA	NA	NA	32.0716	25.4831	NA	NA	19.8863
C3N-03488-T	Tumor	HNSCC	20.0979	18.6968	0.55835	NA	NA	NA	NA	20.7354	NA	NA	NA	NA	NA	NA	NA	17.5734	NA	NA	NA	NA	NA	NA	NA	NA	18.4546	NA	21.576	18.282	NA	NA	NA	NA	NA	NA	NA	NA	17.1217	NA	17.1346	NA	NA	NA	31.5795	26.2172	NA	NA	20.4004
C3N-03490-N	Normal	HNSCC	NA	18.5966	NA	NA	NA	NA	NA	19.4814	NA	NA	NA	NA	NA	NA	NA	NA	NA	NA	NA	NA	17.5285	NA	NA	NA	NA	NA	20.5975	NA	NA	NA	NA	NA	NA	NA	NA	NA	16.7788	NA	NA	NA	NA	NA	31.9265	24.7704	NA	NA	20.0589
C3N-03490-T	Tumor	HNSCC	NA	20.1815	NA	NA	NA	NA	NA	21.5339	NA	NA	NA	NA	NA	NA	NA	NA	NA	NA	NA	NA	19.5553	NA	NA	NA	NA	NA	21.8677	NA	NA	NA	NA	NA	NA	NA	NA	NA	17.7692	NA	NA	NA	NA	NA	31.3903	25.2515	NA	NA	20.7311
C3N-03612-T	Tumor	HNSCC	19.2544	17.62	-0.468814	NA	NA	14.4437	NA	20.4623	NA	NA	NA	NA	NA	NA	NA	16.9135	NA	NA	NA	NA	NA	NA	NA	16.5145	NA	NA	21.0136	18.4699	NA	NA	NA	NA	NA	NA	NA	NA	NA	NA	NA	NA	NA	15.5221	32.1097	25.7142	NA	NA	NA
C3N-03619-N	Normal	HNSCC	NA	16.9186	NA	NA	NA	NA	15.0571	20.1094	NA	NA	NA	NA	NA	NA	NA	NA	NA	NA	NA	NA	NA	15.0438	NA	16.5678	NA	NA	17.4194	17.588	NA	NA	NA	NA	NA	NA	NA	NA	NA	17.7062	NA	NA	NA	15.8574	32.3496	24.8408	NA	NA	20.3515
C3N-03619-T	Tumor	HNSCC	NA	17.0888	NA	NA	NA	NA	14.8743	20.4925	NA	NA	NA	NA	NA	NA	NA	NA	NA	NA	NA	NA	NA	14.9441	NA	16.6376	NA	NA	17.8291	18.6411	NA	NA	NA	NA	NA	NA	NA	NA	NA	17.4059	NA	NA	NA	15.8856	31.2472	25.7304	NA	NA	20.3543
C3N-03620-N	Normal	HNSCC	18.2048	16.2043	-1.8227	NA	NA	NA	NA	NA	NA	NA	NA	NA	NA	NA	NA	15.6072	NA	NA	NA	NA	17.3178	NA	NA	NA	NA	NA	NA	NA	NA	NA	NA	NA	NA	NA	NA	NA	NA	NA	NA	NA	NA	15.6879	32.0615	24.9415	NA	NA	NA
C3N-03620-T	Tumor	HNSCC	19.0596	16.7304	-1.34687	NA	NA	NA	NA	NA	NA	NA	NA	NA	NA	NA	NA	15.7244	NA	NA	NA	NA	18.4723	NA	NA	NA	NA	NA	NA	NA	NA	NA	NA	NA	NA	NA	NA	NA	NA	NA	NA	NA	NA	15.9946	31.7674	24.9958	NA	NA	NA
C3N-03662-N	Normal	LSCC	20.399	18.6231	0.46688	NA	NA	NA	NA	19.2363	NA	NA	NA	NA	NA	NA	NA	18.2843	NA	18.8469	NA	NA	NA	NA	NA	NA	18.5271	NA	19.5585	18.3273	NA	NA	NA	NA	NA	NA	NA	NA	17.5811	NA	NA	NA	NA	NA	32.1921	25.1949	NA	NA	NA
C3N-03662-T	Tumor	LSCC	22.9137	20.4951	2.19074	NA	NA	NA	NA	21.9984	NA	NA	NA	NA	NA	NA	NA	20.842	NA	20.073	NA	NA	NA	NA	NA	NA	19.075	NA	21.5615	20.8457	NA	NA	NA	NA	NA	NA	NA	NA	19.0698	NA	NA	NA	NA	NA	31.4784	26.9305	NA	NA	NA
C3N-03664-T	Tumor	HNSCC	NA	18.4491	NA	16.9665	NA	15.3657	NA	21.6057	NA	NA	NA	NA	NA	NA	NA	NA	NA	NA	NA	NA	NA	NA	NA	NA	18.6941	NA	22.4092	19.3243	NA	NA	NA	19.3937	NA	NA	NA	NA	17.7211	16.3232	NA	NA	NA	16.6871	30.6536	25.2876	NA	NA	19.6661
C3N-03665-T	Tumor	PDA	NA	18.3339	NA	NA	NA	NA	NA	18.3157	NA	NA	NA	NA	NA	NA	NA	17.8659	NA	NA	NA	NA	NA	NA	NA	NA	NA	NA	18.82	NA	NA	NA	NA	NA	NA	NA	NA	NA	NA	NA	NA	NA	NA	NA	32.0113	23.4301	NA	NA	NA
C3N-03666-T	Tumor	PDA	NA	17.4898	NA	NA	NA	NA	NA	NA	NA	NA	NA	NA	NA	NA	NA	19.1581	NA	15.8215	NA	NA	NA	NA	NA	NA	NA	NA	NA	NA	NA	NA	NA	NA	NA	NA	NA	NA	NA	NA	NA	NA	NA	NA	32.3242	23.8238	NA	NA	NA
C3N-03670-T	Tumor	PDA	NA	17.5263	NA	NA	NA	NA	NA	18.1093	NA	NA	NA	NA	NA	NA	NA	17.4908	NA	NA	NA	NA	16.9789	NA	NA	NA	NA	NA	NA	NA	NA	NA	NA	NA	NA	NA	NA	NA	NA	NA	NA	NA	NA	NA	32.0847	23.5947	NA	NA	NA
C3N-03754-T	Tumor	PDA	NA	NA	NA	NA	NA	NA	NA	NA	NA	NA	NA	NA	NA	NA	NA	NA	NA	NA	NA	NA	NA	NA	NA	NA	NA	NA	NA	NA	NA	NA	NA	NA	NA	NA	NA	NA	NA	NA	NA	NA	NA	NA	31.495	24.4969	NA	NA	NA
C3N-03780-N	Normal	PDA	NA	18.2572	NA	NA	NA	NA	NA	NA	NA	NA	NA	NA	NA	NA	NA	18.2572	NA	NA	NA	NA	NA	NA	NA	NA	NA	NA	NA	NA	NA	NA	NA	NA	NA	NA	NA	NA	NA	NA	NA	NA	NA	NA	31.6091	23.6628	NA	NA	NA
C3N-03780-T	Tumor	PDA	NA	19.0213	NA	NA	NA	NA	NA	NA	NA	NA	NA	NA	NA	NA	NA	19.0213	NA	NA	NA	NA	NA	NA	NA	NA	NA	NA	NA	NA	NA	NA	NA	NA	NA	NA	NA	NA	NA	NA	NA	NA	NA	NA	32.1129	23.8983	NA	NA	NA
C3N-03781-N	Normal	HNSCC	NA	17.3022	NA	14.4575	NA	14.499	NA	20.0683	NA	NA	NA	NA	NA	NA	NA	NA	NA	NA	NA	NA	NA	NA	NA	NA	17.7274	NA	20.7641	17.5543	NA	NA	NA	18.148	NA	NA	NA	NA	16.7067	17.5994	NA	NA	NA	15.4976	32.3535	24.6401	NA	NA	20.2364
C3N-03781-T	Tumor	HNSCC	NA	18.1029	NA	16.2439	NA	14.565	NA	20.881	NA	NA	NA	NA	NA	NA	NA	NA	NA	NA	NA	NA	NA	NA	NA	NA	18.3968	NA	21.7079	18.8018	NA	NA	NA	19.0419	NA	NA	NA	NA	16.8529	17.762	NA	NA	NA	16.7761	31.6642	24.8902	NA	NA	20.591
C3N-03782-T	Tumor	HNSCC	19.752	18.3045	0.186408	NA	NA	NA	NA	21.4038	NA	NA	NA	NA	NA	NA	NA	15.4814	NA	NA	NA	NA	NA	NA	NA	NA	17.7882	NA	21.5192	18.2686	NA	NA	NA	NA	NA	NA	NA	NA	16.7379	NA	16.9324	NA	NA	NA	30.7053	26.1364	NA	NA	20.084
C3N-03783-T	Tumor	HNSCC	19.3695	18.5766	0.481038	NA	NA	NA	NA	NA	NA	NA	NA	NA	NA	NA	NA	NA	NA	NA	NA	NA	NA	NA	NA	NA	18.0418	NA	21.2807	18.4047	NA	NA	NA	NA	NA	NA	NA	NA	NA	NA	16.5793	NA	NA	NA	31.6944	25.9648	NA	NA	20.776
C3N-03785-T	Tumor	HNSCC	19.5554	18.3551	0.248584	NA	NA	NA	NA	21.2321	NA	NA	NA	NA	NA	NA	NA	15.5356	NA	NA	NA	NA	18.2749	NA	NA	NA	NA	NA	22.4552	18.6403	NA	NA	NA	NA	NA	NA	NA	NA	17.2148	16.9366	NA	NA	NA	16.5513	30.4654	26.3157	NA	11.7046	21.4802
C3N-03837-N	Normal	HNSCC	16.3626	17.621	-0.297483	NA	NA	NA	NA	19.549	NA	NA	NA	NA	NA	NA	NA	15.4757	NA	NA	NA	NA	16.9487	NA	NA	NA	NA	NA	21.1189	17.6464	NA	NA	NA	NA	NA	NA	NA	NA	16.889	17.5512	NA	NA	NA	15.789	31.7144	25.0625	NA	11.2289	19.7272
C3N-03837-T	Tumor	HNSCC	19.4258	18.1124	0.013487	NA	NA	NA	NA	20.4465	NA	NA	NA	NA	NA	NA	NA	16.8012	NA	NA	NA	NA	18.7509	NA	NA	NA	NA	NA	20.8226	18.1694	NA	NA	NA	NA	NA	NA	NA	NA	16.5726	17.7011	NA	NA	NA	15.6346	31.0504	25.5374	NA	11.5374	20.0699
C3N-03839-N	Normal	PDA	NA	17.4851	NA	NA	NA	NA	NA	NA	NA	NA	NA	NA	NA	NA	NA	17.4851	NA	NA	NA	NA	NA	NA	NA	NA	NA	NA	NA	NA	NA	NA	NA	NA	NA	NA	NA	NA	NA	NA	NA	NA	NA	NA	30.7504	23.9158	NA	NA	NA
C3N-03839-T	Tumor	PDA	NA	18.5041	NA	NA	NA	NA	NA	NA	NA	NA	NA	NA	NA	NA	NA	18.5041	NA	NA	NA	NA	NA	NA	NA	NA	NA	NA	NA	NA	NA	NA	NA	NA	NA	NA	NA	NA	NA	NA	NA	NA	NA	NA	32.0662	24.4898	NA	NA	NA
C3N-03840-N	Normal	PDA	19.4757	17.214	-0.887875	NA	NA	NA	NA	NA	NA	NA	NA	NA	NA	NA	NA	17.2764	NA	NA	NA	NA	NA	NA	NA	NA	NA	NA	19.7309	16.4216	NA	NA	NA	15.427	NA	NA	NA	NA	NA	NA	NA	NA	NA	NA	30.4996	24.9208	NA	NA	18.0189
C3N-03840-T	Tumor	PDA	18.7447	16.914	-1.14474	NA	NA	NA	NA	NA	NA	NA	NA	NA	NA	NA	NA	18.9603	NA	NA	NA	NA	NA	NA	NA	NA	NA	NA	18.1706	15.6092	NA	NA	NA	14.916	NA	NA	NA	NA	NA	NA	NA	NA	NA	NA	31.4748	23.8626	NA	NA	18.1006
C3N-03841-N	Normal	HNSCC	19.2464	17.8414	-0.24691	NA	NA	NA	NA	NA	NA	NA	NA	NA	NA	NA	NA	15.6703	NA	14.9285	NA	NA	17.2544	NA	NA	NA	NA	NA	21.2968	17.8874	NA	NA	NA	18.9507	NA	NA	NA	NA	16.7384	18.1872	NA	21.716	NA	15.7845	32.0914	25.4551	NA	NA	20.2718
C3N-03841-T	Tumor	HNSCC	19.429	18.0141	-0.0849629	NA	NA	NA	NA	NA	NA	NA	NA	NA	NA	NA	NA	15.8718	NA	15.2629	NA	NA	17.9269	NA	NA	NA	NA	NA	22.0435	18.8143	NA	NA	NA	19.4988	NA	NA	NA	NA	16.7364	17.9813	NA	19.412	NA	16.5933	30.813	25.9623	NA	NA	21.2289
C3N-03848-N	Normal	LSCC	20.8019	18.4611	0.281132	NA	NA	NA	NA	NA	NA	NA	NA	NA	NA	NA	NA	17.004	NA	NA	NA	NA	17.6563	NA	NA	NA	19.5513	NA	19.5825	18.5112	NA	NA	NA	NA	NA	NA	NA	NA	NA	NA	NA	NA	NA	NA	31.8455	25.284	NA	NA	20.4778
C3N-03848-T	Tumor	LSCC	21.5399	20.2323	2.00892	NA	NA	NA	NA	NA	NA	NA	NA	NA	NA	NA	NA	21.484	NA	NA	NA	NA	20.0984	NA	NA	NA	19.635	NA	20.3495	19.5947	NA	NA	NA	NA	NA	NA	NA	NA	NA	NA	NA	NA	NA	NA	31.5268	25.7139	NA	19.0816	20.0384
C3N-03849-N	Normal	HNSCC	19.9664	17.0782	-1.05248	NA	14.9911	NA	NA	19.9751	NA	NA	NA	NA	NA	NA	NA	NA	NA	NA	NA	NA	NA	NA	NA	NA	19.0006	NA	17.1705	18.0459	NA	NA	NA	18.6623	13.6221	NA	NA	NA	16.7841	17.868	16.6025	NA	NA	15.1384	32.6718	25.1581	NA	11.3694	NA
C3N-03849-T	Tumor	HNSCC	19.4229	17.2767	-0.821999	NA	14.9215	NA	NA	20.465	NA	NA	NA	NA	NA	NA	NA	NA	NA	NA	NA	NA	NA	NA	NA	NA	18.1489	NA	18.0854	18.4942	NA	NA	NA	18.8614	13.9085	NA	NA	NA	17.1186	17.1061	16.7158	NA	NA	16.2186	30.9619	26.9108	NA	11.3254	NA
C3N-03851-N	Normal	LSCC	20.4276	17.1894	-0.968473	NA	16.8468	16.5718	NA	19.2988	NA	NA	NA	NA	NA	NA	NA	NA	NA	NA	NA	NA	18.5562	NA	NA	NA	18.3058	NA	17.1089	18.5501	NA	NA	NA	NA	NA	NA	NA	NA	17.8468	NA	14.6821	NA	14.1269	NA	32.2065	25.384	NA	18.2972	20.4245
C3N-03851-T	Tumor	LSCC	23.2506	18.9932	0.669	NA	18.596	17.5426	NA	22.8059	NA	NA	NA	NA	NA	15.3815	NA	NA	NA	NA	NA	NA	19.7932	NA	NA	NA	20.6568	NA	19.6437	21.4474	NA	NA	NA	NA	NA	NA	NA	NA	19.6088	NA	16.6801	NA	16.769	NA	31.0691	27.4649	NA	19.7685	20.3274
C3N-03853-N	Normal	PDA	NA	19.7279	NA	NA	NA	NA	NA	19.7719	NA	NA	NA	NA	NA	NA	NA	NA	NA	NA	NA	NA	NA	NA	NA	NA	NA	NA	19.6838	NA	NA	NA	NA	NA	NA	NA	NA	NA	NA	NA	NA	NA	NA	NA	32.6971	24.9345	NA	NA	NA
C3N-03853-T	Tumor	PDA	NA	18.6462	NA	NA	NA	NA	NA	18.5521	NA	NA	NA	NA	NA	NA	NA	NA	NA	NA	NA	NA	NA	NA	NA	NA	NA	NA	18.7404	NA	NA	NA	NA	NA	NA	NA	NA	NA	NA	NA	NA	NA	NA	NA	31.7843	24.2194	NA	NA	NA
C3N-03875-N	Normal	LSCC	22.1742	17.6132	-0.647608	15.4681	17.3861	NA	NA	19.1734	NA	NA	NA	NA	NA	NA	NA	17.2791	NA	NA	NA	NA	17.5103	NA	NA	NA	18.1769	NA	18.8875	NA	NA	NA	NA	NA	NA	NA	NA	NA	17.0239	NA	NA	NA	NA	NA	32.2689	24.6301	NA	NA	20.9212
C3N-03875-T	Tumor	LSCC	21.7777	19.8027	1.5653	17.602	17.2302	NA	NA	21.7959	NA	NA	NA	NA	NA	NA	NA	22.071	NA	NA	NA	NA	19.9783	NA	NA	NA	19.8544	NA	20.4314	20.7137	NA	NA	NA	NA	NA	NA	NA	NA	18.5476	NA	NA	NA	NA	NA	30.9386	26.6526	NA	NA	21.4156
C3N-03876-N	Normal	HNSCC	19.1852	17.9229	-0.161804	NA	NA	NA	NA	19.6108	NA	NA	NA	NA	NA	NA	NA	15.68	NA	NA	NA	NA	NA	NA	NA	NA	17.9193	NA	20.8808	18.2274	NA	NA	NA	NA	NA	NA	NA	NA	16.7904	NA	16.3516	NA	NA	NA	31.9765	25.5466	NA	NA	20.0173
C3N-03876-T	Tumor	HNSCC	20.7006	18.9398	0.76581	NA	NA	NA	NA	21.639	NA	NA	NA	NA	NA	NA	NA	16.4769	NA	NA	NA	NA	NA	NA	NA	NA	18.3709	NA	22.1376	19.1591	NA	NA	NA	NA	NA	NA	NA	NA	17.5303	NA	17.2646	NA	NA	NA	30.7757	26.1164	NA	NA	20.4033
C3N-03877-N	Normal	LSCC	19.5721	17.7839	-0.323557	NA	17.542	NA	NA	18.6706	NA	NA	NA	NA	NA	NA	NA	NA	NA	NA	NA	NA	16.9629	NA	NA	NA	18.1852	NA	NA	18.2346	NA	NA	NA	17.6688	NA	NA	NA	NA	17.2236	NA	NA	NA	NA	NA	32.3298	25.2277	15.6025	18.8918	20.6652
C3N-03877-T	Tumor	LSCC	23.2128	19.8702	1.54824	NA	17.5833	NA	NA	22.2765	NA	NA	NA	NA	NA	NA	NA	NA	NA	NA	NA	NA	19.6971	NA	NA	NA	19.9832	NA	NA	21.1911	NA	NA	NA	19.0411	NA	NA	NA	NA	19.3188	NA	NA	NA	NA	NA	30.7333	26.954	15.4935	18.8912	19.6359
C3N-03878-N	Normal	HNSCC	NA	18.1491	NA	NA	NA	NA	NA	NA	13.9898	NA	NA	NA	NA	NA	NA	16.5278	NA	NA	NA	NA	17.5919	NA	NA	NA	NA	NA	20.9169	NA	NA	NA	NA	NA	NA	NA	NA	NA	NA	NA	NA	21.7193	NA	NA	31.6976	25.0418	NA	NA	20.7254
C3N-03878-T	Tumor	HNSCC	NA	18.4411	NA	NA	NA	NA	NA	NA	15.7683	NA	NA	NA	NA	NA	NA	16.505	NA	NA	NA	NA	18.4357	NA	NA	NA	NA	NA	21.9317	NA	NA	NA	NA	NA	NA	NA	NA	NA	NA	NA	NA	19.5649	NA	NA	31.1681	25.7573	NA	NA	20.4818
C3N-03880-N	Normal	LSCC	20.7484	18.0533	-0.123435	NA	NA	NA	NA	18.9544	NA	NA	NA	NA	NA	NA	NA	17.2073	NA	NA	NA	NA	17.3862	NA	NA	NA	NA	NA	19.6591	18.2793	NA	NA	NA	NA	NA	NA	NA	NA	16.8336	NA	NA	NA	NA	NA	32.4238	24.8807	NA	18.5454	20.8166
C3N-03880-T	Tumor	LSCC	21.8647	20.281	2.03847	NA	NA	NA	NA	21.7912	NA	NA	NA	NA	NA	NA	NA	21.3996	NA	NA	NA	NA	18.888	NA	NA	NA	NA	NA	20.7523	20.1699	NA	NA	NA	NA	NA	NA	NA	NA	18.685	NA	NA	NA	NA	NA	31.0592	26.4786	NA	19.3637	20.2684
C3N-03882-N	Normal	LSCC	20.4703	17.1337	-1.02669	NA	16.9164	16.4633	NA	19.6463	NA	NA	NA	NA	NA	NA	NA	NA	NA	NA	NA	NA	NA	NA	NA	NA	18.2398	NA	19.3855	18.1403	NA	NA	NA	NA	NA	NA	NA	NA	17.1781	NA	14.3046	NA	13.9292	NA	32.0922	24.8622	NA	NA	20.5475
C3N-03882-T	Tumor	LSCC	22.5347	18.8741	0.592063	NA	17.1716	17.2458	NA	21.7324	NA	NA	NA	NA	NA	NA	NA	21.5418	NA	NA	NA	NA	NA	NA	NA	NA	19.7854	NA	21.1411	20.105	NA	NA	NA	NA	NA	NA	NA	NA	18.6946	NA	16.311	NA	15.0118	NA	30.4651	27.1152	NA	NA	22.3871
C3N-03884-N	Normal	PDA	19.2077	17.7199	-0.366141	NA	NA	NA	NA	18.469	NA	NA	NA	NA	NA	NA	NA	NA	NA	16.3702	NA	NA	16.2719	NA	NA	NA	NA	NA	17.7704	NA	NA	NA	NA	16.4662	NA	NA	NA	NA	NA	NA	NA	20.9717	NA	NA	30.9857	24.2979	NA	NA	NA
C3N-03884-T	Tumor	PDA	19.1983	18.511	0.425548	NA	NA	NA	NA	19.3428	NA	NA	NA	NA	NA	NA	NA	NA	NA	16.9699	NA	NA	17.3197	NA	NA	NA	NA	NA	19.3893	NA	NA	NA	NA	17.5037	NA	NA	NA	NA	NA	NA	NA	20.5408	NA	NA	31.7054	24.4271	NA	NA	NA
C3N-03886-N	Normal	LSCC	19.8869	18.109	-0.0170068	NA	NA	NA	NA	NA	NA	NA	NA	NA	NA	NA	NA	NA	NA	19.0489	NA	NA	17.4773	NA	NA	NA	18.5393	NA	17.1396	18.3401	NA	NA	NA	NA	NA	NA	NA	NA	NA	NA	NA	NA	NA	NA	32.3679	25.7208	NA	NA	21.6642
C3N-03886-T	Tumor	LSCC	22.672	20.3077	2.01761	NA	NA	NA	NA	NA	NA	NA	NA	NA	NA	NA	NA	21.9	NA	19.7834	NA	NA	20.3015	NA	NA	NA	20.2132	NA	18.9825	20.6657	NA	NA	NA	NA	NA	NA	NA	NA	NA	NA	NA	NA	NA	NA	30.8398	28.6773	NA	NA	20.3456
C3N-03888-N	Normal	HNSCC	19.4918	18.1937	0.0908772	NA	NA	NA	NA	NA	NA	NA	NA	NA	NA	NA	NA	NA	NA	NA	NA	NA	NA	NA	NA	NA	17.713	NA	20.3288	18.6147	NA	NA	NA	NA	NA	NA	NA	NA	NA	NA	16.1181	NA	NA	NA	31.842	24.7535	NA	NA	20.157
C3N-03888-T	Tumor	HNSCC	17.8752	18.5212	0.513658	NA	NA	NA	NA	NA	NA	NA	NA	NA	NA	NA	NA	NA	NA	NA	NA	NA	NA	NA	NA	NA	18.0951	NA	21.2411	18.1767	NA	NA	NA	NA	NA	NA	NA	NA	NA	NA	16.572	NA	NA	NA	30.8675	25.709	NA	NA	20.936
C3N-03889-T	Tumor	HNSCC	18.6193	18.9736	0.922243	NA	NA	NA	NA	20.5174	NA	NA	NA	NA	NA	NA	NA	16.469	NA	NA	NA	NA	17.6402	NA	NA	NA	NA	NA	21.214	NA	NA	NA	NA	18.893	NA	NA	NA	NA	NA	NA	NA	19.1081	NA	NA	31.2973	24.9635	NA	NA	20.4408
C3N-03928-N	Normal	HNSCC	23.9999	18.4511	0.0828163	NA	NA	NA	NA	NA	NA	NA	NA	NA	NA	NA	NA	NA	NA	NA	NA	NA	NA	NA	NA	NA	18.2617	NA	21.5533	17.8243	NA	NA	NA	NA	NA	NA	NA	NA	NA	NA	16.1652	NA	NA	NA	32.1134	25.2323	NA	NA	20.3287
C3N-03928-T	Tumor	HNSCC	22.0266	18.701	0.448896	NA	NA	NA	NA	NA	NA	NA	NA	NA	NA	NA	NA	NA	NA	NA	NA	NA	NA	NA	NA	NA	18.5714	NA	21.6569	17.9002	NA	NA	NA	NA	NA	NA	NA	NA	NA	NA	16.6754	NA	NA	NA	31.2156	25.2688	NA	NA	20.4003
C3N-03933-N	Normal	HNSCC	NA	17.3376	NA	13.7231	NA	14.7369	NA	19.6257	NA	NA	NA	NA	NA	NA	NA	NA	NA	NA	NA	NA	NA	NA	NA	NA	17.6049	NA	20.4579	17.7479	NA	NA	NA	19.0277	NA	NA	NA	NA	17.0112	17.9615	NA	NA	NA	15.4787	32.4219	24.6952	NA	NA	19.9549
C3N-03933-T	Tumor	HNSCC	NA	17.8352	NA	14.8716	NA	14.4958	NA	20.3721	NA	NA	NA	NA	NA	NA	NA	NA	NA	NA	NA	NA	NA	NA	NA	NA	18.5351	NA	21.2881	18.2123	NA	NA	NA	19.4661	NA	NA	NA	NA	16.71	18.6215	NA	NA	NA	15.7799	31.0613	25.2049	NA	NA	20.1022
C3N-04119-N	Normal	PDA	NA	18.0799	NA	NA	NA	NA	NA	NA	NA	NA	NA	NA	NA	NA	NA	16.2263	NA	NA	NA	NA	NA	NA	NA	NA	NA	NA	NA	NA	NA	NA	NA	NA	NA	NA	NA	NA	NA	NA	NA	19.9335	NA	NA	30.4843	22.9534	NA	NA	19.7984
C3N-04119-T	Tumor	PDA	NA	18.8398	NA	NA	NA	NA	NA	NA	NA	NA	NA	NA	NA	NA	NA	18.0066	NA	NA	NA	NA	NA	NA	NA	NA	NA	NA	NA	NA	NA	NA	NA	NA	NA	NA	NA	NA	NA	NA	NA	19.673	NA	NA	32.3204	23.701	NA	NA	17.6227
C3N-04124-N	Normal	LSCC	20.0755	18.2394	0.102256	NA	NA	NA	NA	NA	NA	NA	NA	NA	NA	NA	NA	17.7209	NA	19.1652	NA	NA	17.6808	NA	NA	NA	NA	NA	18.9096	17.7205	NA	NA	NA	NA	NA	NA	NA	NA	18.2394	NA	NA	NA	NA	NA	32.1091	24.8204	NA	NA	20.3713
C3N-04124-T	Tumor	LSCC	22.1652	19.9641	1.70387	NA	NA	NA	NA	NA	NA	NA	NA	NA	NA	NA	NA	21.9347	NA	19.6443	NA	NA	19.3971	NA	NA	NA	NA	NA	20.6631	20.224	NA	NA	NA	NA	NA	NA	NA	NA	17.9216	NA	NA	NA	NA	NA	31.1347	26.1234	NA	NA	20.0209
C3N-04126-T	Tumor	PDA	NA	18.697	NA	NA	NA	NA	NA	18.8137	NA	NA	NA	NA	NA	NA	NA	NA	NA	NA	NA	NA	NA	NA	NA	NA	NA	NA	18.5802	NA	NA	NA	NA	NA	NA	NA	NA	NA	NA	NA	NA	NA	NA	NA	32.0438	24.2225	NA	NA	NA
C3N-04127-N	Normal	LSCC	22.183	18.0295	-0.231805	NA	NA	NA	NA	NA	NA	NA	NA	NA	NA	NA	NA	17.6623	NA	NA	NA	NA	17.6361	NA	NA	NA	17.8295	NA	19.604	18.6967	NA	NA	NA	NA	NA	NA	NA	NA	16.7484	NA	NA	NA	NA	NA	32.5373	24.5554	NA	NA	20.201
C3N-04127-T	Tumor	LSCC	21.1391	20.1311	1.93133	NA	NA	NA	NA	NA	NA	NA	NA	NA	NA	NA	NA	21.5211	NA	NA	NA	NA	19.6578	NA	NA	NA	19.4143	NA	21.0192	20.7012	NA	NA	NA	NA	NA	NA	NA	NA	18.4732	NA	NA	NA	NA	NA	31.5466	25.8842	NA	NA	19.9595
C3N-04152-T	Tumor	HNSCC	20.4965	19.6725	1.51052	NA	NA	NA	NA	21.2955	NA	NA	NA	NA	NA	NA	NA	17.9198	NA	NA	NA	NA	19.0917	NA	NA	NA	NA	NA	21.6981	NA	NA	NA	NA	19.248	NA	NA	NA	NA	NA	NA	NA	18.7818	NA	NA	30.7452	26.5847	NA	NA	21.16
C3N-04155-N	Normal	LSCC	21.3879	17.7313	-0.483167	15.7313	17.4453	NA	NA	19.8971	NA	NA	NA	NA	NA	NA	NA	18.1281	NA	NA	NA	14.0249	17.879	NA	NA	NA	19.667	NA	19.081	NA	NA	NA	NA	17.8252	NA	NA	NA	NA	17.634	NA	NA	NA	NA	NA	32.2462	25.9605	15.594	18.675	NA
C3N-04155-T	Tumor	LSCC	21.4415	19.0285	0.810897	17.7088	16.9719	NA	NA	21.6539	NA	NA	NA	NA	NA	NA	NA	21.3033	NA	NA	NA	14.198	20.3238	NA	NA	NA	18.8528	NA	21.1167	21.0961	NA	NA	NA	17.7494	NA	NA	NA	NA	18.339	NA	NA	NA	NA	NA	30.7465	27.2407	15.6118	20.6635	NA
C3N-04162-N	Normal	LSCC	21.4802	18.0522	-0.16767	15.5599	17.3424	NA	NA	19.6067	NA	NA	NA	NA	NA	NA	NA	NA	NA	NA	NA	NA	17.6063	NA	NA	NA	18.7419	NA	19.4975	18.9339	NA	NA	NA	NA	NA	NA	NA	NA	17.1293	NA	NA	NA	NA	NA	32.6242	24.8149	NA	NA	20.4941
C3N-04162-T	Tumor	LSCC	21.1796	19.9798	1.77764	18.6728	16.9722	NA	NA	22.4563	NA	NA	NA	NA	NA	NA	NA	21.1835	NA	NA	NA	NA	19.3495	NA	NA	NA	19.3293	NA	21.3613	21.4785	NA	NA	NA	NA	NA	NA	NA	NA	19.0148	NA	NA	NA	NA	NA	30.8151	26.6941	NA	NA	20.922
C3N-04273-T	Tumor	HNSCC	18.728	17.4854	-0.57239	NA	15.3317	NA	NA	21.1825	NA	NA	NA	NA	NA	NA	NA	NA	NA	NA	NA	NA	NA	NA	NA	NA	18.7233	NA	17.5745	18.7054	NA	NA	NA	19.0971	14.2729	NA	NA	NA	16.9441	16.9898	16.9357	NA	NA	16.5821	30.8513	26.2174	NA	11.6762	NA
C3N-04275-N	Normal	HNSCC	19.8087	19.0372	0.915754	NA	NA	NA	NA	20.0501	NA	NA	NA	NA	NA	NA	NA	16.7357	NA	NA	NA	NA	17.5947	NA	NA	NA	NA	NA	20.7565	NA	NA	NA	NA	18.4534	NA	NA	NA	NA	NA	NA	NA	20.6328	NA	NA	31.8693	25.5601	NA	NA	20.0786
C3N-04275-T	Tumor	HNSCC	19.8726	19.3086	1.18335	NA	NA	NA	NA	20.231	NA	NA	NA	NA	NA	NA	NA	17.783	NA	NA	NA	NA	18.2545	NA	NA	NA	NA	NA	21.1702	NA	NA	NA	NA	18.7016	NA	NA	NA	NA	NA	NA	NA	19.7109	NA	NA	31.1168	25.4027	NA	NA	19.9533
C3N-04276-N	Normal	HNSCC	19.0086	18.6147	0.540431	NA	NA	NA	NA	NA	NA	NA	NA	NA	NA	NA	NA	NA	NA	NA	NA	NA	NA	NA	NA	NA	17.9761	NA	20.8353	19.2845	NA	NA	NA	NA	NA	NA	NA	NA	NA	NA	16.3631	NA	NA	NA	31.9047	25.2031	NA	NA	21.0514
C3N-04276-T	Tumor	HNSCC	NA	18.6476	NA	NA	NA	NA	NA	NA	NA	NA	NA	NA	NA	NA	NA	NA	NA	NA	NA	NA	NA	NA	NA	NA	17.9761	NA	21.7334	18.2408	NA	NA	NA	NA	NA	NA	NA	NA	NA	NA	16.6401	NA	NA	NA	32.1195	26.5823	NA	NA	20.7446
C3N-04277-N	Normal	HNSCC	NA	18.212	NA	NA	NA	NA	NA	19.7187	NA	NA	NA	NA	NA	NA	NA	NA	NA	NA	NA	NA	NA	NA	NA	NA	NA	NA	20.9902	17.8213	NA	NA	NA	18.6857	NA	NA	NA	NA	16.778	NA	NA	NA	NA	15.2784	32.4861	24.8999	NA	NA	20.0946
C3N-04277-T	Tumor	HNSCC	NA	18.9132	NA	NA	NA	NA	NA	21.138	NA	NA	NA	NA	NA	NA	NA	NA	NA	NA	NA	NA	NA	NA	NA	NA	NA	NA	21.2493	18.7651	NA	NA	NA	18.618	NA	NA	NA	NA	17.0068	NA	NA	NA	NA	16.7022	31.6703	25.2398	NA	NA	19.8133
C3N-04278-N	Normal	HNSCC	18.008	17.7592	-0.256133	NA	NA	NA	NA	19.5177	NA	NA	NA	NA	NA	NA	NA	16.2005	NA	NA	NA	NA	18.113	NA	NA	NA	NA	NA	20.7172	17.5687	NA	NA	NA	NA	NA	NA	NA	NA	16.7502	17.4161	NA	NA	NA	15.7906	31.8101	25.4009	NA	11.5088	20.6412
C3N-04278-T	Tumor	HNSCC	19.835	18.7993	0.676315	NA	NA	NA	NA	21.2652	NA	NA	NA	NA	NA	NA	NA	18.4915	NA	NA	NA	NA	19.2042	NA	NA	NA	NA	NA	21.1909	18.695	NA	NA	NA	NA	NA	NA	NA	NA	17.0632	17.692	NA	NA	NA	16.7924	31.1937	26.5851	NA	11.2134	19.9793
C3N-04279-N	Normal	HNSCC	19.6274	17.7444	-0.366334	NA	NA	NA	NA	19.895	NA	NA	NA	NA	NA	NA	NA	16.4804	NA	NA	NA	NA	NA	NA	NA	NA	17.9629	NA	20.9428	16.5014	NA	NA	NA	16.6378	NA	NA	NA	NA	NA	NA	NA	NA	NA	15.7908	32.3437	25.245	NA	NA	19.4112
C3N-04279-T	Tumor	HNSCC	20.2296	19.398	1.2518	NA	NA	NA	NA	21.544	NA	NA	NA	NA	NA	NA	NA	18.9928	NA	NA	NA	NA	NA	NA	NA	NA	19.0191	NA	21.5539	19.2389	NA	NA	NA	17.6522	NA	NA	NA	NA	NA	NA	NA	NA	NA	17.7851	30.3725	26.4675	NA	NA	22.0006
C3N-04280-T	Tumor	HNSCC	20.123	17.9506	-0.189304	NA	NA	NA	NA	19.9258	NA	NA	NA	NA	NA	NA	NA	16.29	NA	NA	NA	NA	NA	NA	NA	NA	18.3661	NA	20.9222	16.9869	NA	NA	NA	17.2932	NA	NA	NA	NA	NA	NA	NA	NA	NA	15.8703	30.732	25.5418	NA	NA	19.2881
C3N-04282-N	Normal	PDA	19.2586	17.1446	-0.944476	NA	NA	NA	NA	19.2808	NA	NA	NA	NA	NA	NA	NA	18.5423	NA	NA	NA	NA	NA	NA	NA	NA	NA	NA	19.4294	16.6527	NA	NA	NA	17.7412	NA	NA	NA	NA	14.7629	13.6026	NA	NA	NA	NA	33.4232	24.5825	NA	NA	17.839
C3N-04282-T	Tumor	PDA	19.2228	16.3421	-1.74481	NA	NA	NA	NA	18.521	NA	NA	NA	NA	NA	NA	NA	18.5116	NA	NA	NA	NA	NA	NA	NA	NA	NA	NA	18.4658	15.3575	NA	NA	NA	16.2676	NA	NA	NA	NA	14.0282	13.243	NA	NA	NA	NA	32.3275	23.9673	NA	NA	19.7091
C3N-04283-N	Normal	PDA	NA	18.7777	NA	NA	NA	NA	NA	18.5092	NA	NA	NA	NA	NA	NA	NA	NA	NA	NA	NA	NA	NA	NA	NA	NA	NA	NA	19.0461	NA	NA	NA	NA	NA	NA	NA	NA	NA	NA	NA	NA	NA	NA	NA	30.9869	24.732	NA	NA	NA
C3N-04283-T	Tumor	PDA	NA	18.7437	NA	NA	NA	NA	NA	18.5466	NA	NA	NA	NA	NA	NA	NA	NA	NA	NA	NA	NA	NA	NA	NA	NA	NA	NA	18.9407	NA	NA	NA	NA	NA	NA	NA	NA	NA	NA	NA	NA	NA	NA	NA	31.3684	24.8091	NA	NA	NA
C3N-04284-T	Tumor	PDA	NA	19.3655	NA	NA	NA	NA	NA	NA	NA	NA	NA	NA	NA	NA	NA	18.8967	NA	NA	NA	NA	NA	NA	NA	NA	NA	NA	NA	NA	NA	NA	NA	NA	NA	NA	NA	NA	NA	NA	NA	19.8343	NA	NA	31.0373	24.1126	NA	NA	18.4917
C3N-04611-T	Tumor	HNSCC	19.9871	19.014	0.88203	NA	NA	NA	NA	21.841	NA	NA	NA	NA	NA	NA	NA	NA	NA	15.5675	NA	NA	NA	NA	NA	NA	18.602	NA	21.7625	19.3999	NA	NA	NA	NA	NA	NA	NA	NA	NA	NA	NA	18.4637	NA	17.4613	31.4647	25.4698	NA	NA	20.3141
GTEX-NPJ7-0011-R10A-SM-HAKXW-N	Normal	GBM	NA	18.3418	NA	NA	NA	NA	NA	NA	NA	NA	NA	NA	NA	NA	NA	17.2951	NA	NA	NA	NA	18.7303	NA	NA	NA	NA	NA	19.3179	18.0237	NA	NA	NA	NA	NA	NA	NA	NA	NA	NA	NA	NA	NA	NA	31.1699	24.2567	NA	NA	NA
GTEX-P44H-0011-R10A-SM-HAKXX-N	Normal	GBM	16.8305	17.9149	-0.0311339	NA	NA	NA	NA	18.7839	NA	NA	NA	NA	NA	NA	NA	17.2865	NA	NA	NA	NA	18.4501	NA	NA	NA	NA	16.2816	19.8913	NA	NA	NA	NA	NA	NA	NA	NA	NA	NA	16.7959	NA	NA	NA	NA	31.0315	24.3687	NA	NA	NA
GTEX-Q2AG-0011-R10A-SM-HAKXT-N	Normal	GBM	NA	17.6337	NA	NA	NA	NA	NA	NA	NA	NA	NA	NA	NA	NA	NA	NA	NA	NA	NA	NA	NA	NA	NA	NA	NA	NA	NA	17.6337	NA	NA	NA	NA	NA	NA	NA	NA	NA	NA	NA	NA	NA	NA	31.1792	24.0334	NA	NA	NA
GTEX-QVJO-0011-R10A-SM-HAKXV-N	Normal	GBM	18.9606	17.8125	-0.259003	NA	NA	NA	NA	NA	NA	NA	NA	NA	NA	NA	NA	NA	NA	NA	NA	NA	NA	NA	NA	NA	NA	NA	20.1951	17.4798	NA	NA	NA	NA	NA	NA	NA	NA	NA	15.7626	NA	NA	NA	NA	31.2364	24.5058	NA	NA	20.6721
GTEX-R55F-0011-R10A-SM-HAKXY-N	Normal	GBM	17.235	16.7203	-1.24952	NA	NA	NA	NA	19.4093	NA	NA	NA	NA	NA	NA	NA	NA	NA	15.1496	NA	NA	NA	NA	NA	NA	NA	14.9315	20.0314	17.975	NA	NA	NA	14.5545	NA	NA	NA	NA	14.9911	NA	NA	NA	NA	NA	31.1637	25.0017	NA	16.1529	NA
GTEX-RN5K-0011-R10A-SM-HAKXU-N	Normal	GBM	17.6599	17.5377	-0.457136	NA	NA	NA	NA	NA	NA	NA	NA	NA	NA	NA	NA	NA	NA	NA	NA	NA	18.2034	NA	NA	NA	NA	15.5787	20.255	18.2868	NA	NA	NA	NA	NA	NA	NA	NA	NA	15.3647	NA	NA	NA	NA	31.2218	24.3121	NA	16.8909	NA
GTEX-RU72-0011-R10A-SM-HAKXS-N	Normal	GBM	17.0516	16.8723	-1.08673	NA	NA	NA	NA	NA	NA	15.0191	NA	NA	NA	NA	NA	16.5861	NA	NA	NA	NA	NA	NA	NA	NA	NA	15.1555	18.4289	19.1721	NA	NA	NA	NA	NA	NA	NA	NA	NA	NA	NA	NA	NA	NA	31.1428	24.3162	NA	NA	18.7035
GTEX-UTHO-0011-R10A-SM-HAKY2-N	Normal	GBM	NA	17.3666	NA	NA	NA	NA	NA	NA	NA	NA	NA	NA	NA	NA	NA	NA	NA	15.2735	NA	NA	NA	NA	NA	NA	NA	NA	19.02	17.8062	NA	NA	NA	NA	NA	NA	NA	NA	NA	NA	NA	NA	NA	NA	31.6128	23.494	NA	NA	NA
GTEX-WVLH-0011-R10A-SM-HAKXZ-N	Normal	GBM	NA	17.8361	NA	NA	14.4488	NA	NA	19.3484	NA	NA	NA	NA	NA	NA	NA	NA	NA	NA	NA	NA	NA	NA	NA	NA	NA	NA	19.1865	18.3608	NA	NA	NA	NA	NA	NA	NA	NA	NA	NA	NA	NA	NA	NA	31.1181	24.3113	NA	NA	NA
GTEX-Y8DK-0011-R10A-SM-HAKY1-N	Normal	GBM	17.7285	16.4538	-1.54507	NA	NA	NA	NA	NA	NA	NA	NA	NA	13.7519	NA	NA	NA	NA	NA	NA	NA	NA	NA	NA	NA	NA	14.831	18.9871	18.2454	NA	NA	NA	NA	NA	NA	NA	NA	NA	NA	NA	NA	NA	NA	31.1185	24.2006	NA	NA	19.4802
NX1-N	Normal	UCEC	NA	17.6077	NA	NA	NA	17.3883	NA	21.2394	NA	NA	16.4997	NA	17.8236	NA	NA	NA	NA	18.5355	12.846	NA	NA	NA	NA	NA	NA	NA	20.8023	19.8151	NA	NA	NA	17.5825	NA	NA	NA	14.4488	16.7037	NA	NA	NA	NA	NA	32.5652	25.8784	NA	20.547	20.2628
NX2-N	Normal	UCEC	NA	17.3023	NA	NA	NA	17.5087	NA	20.809	NA	NA	15.8445	NA	17.0985	NA	NA	NA	NA	18.363	12.7651	NA	NA	NA	NA	NA	NA	NA	19.9488	19.6276	NA	NA	NA	17.8792	NA	NA	NA	14.2598	16.2208	NA	NA	NA	NA	NA	32.5318	24.8348	NA	20.5202	19.776
NX3-N	Normal	UCEC	19.7142	17.0588	-1.05702	NA	13.8371	17.6355	NA	20.4799	NA	NA	NA	16.4982	17.4051	NA	NA	17.7154	15.0268	18.3821	NA	NA	NA	NA	NA	NA	NA	12.9438	19.2225	19.5418	NA	16.2758	NA	NA	NA	NA	NA	NA	NA	NA	16.8012	NA	NA	NA	32.7907	24.8871	NA	20.4261	19.415
NX4-N	Normal	UCEC	19.7209	17.0759	-1.04036	NA	13.7639	17.5856	NA	20.9217	NA	NA	NA	16.7879	17.6865	NA	NA	17.8638	14.7965	18.4954	NA	NA	NA	NA	NA	NA	NA	13.8474	19.4402	19.8919	NA	16.9176	NA	14.0069	NA	NA	NA	NA	NA	NA	17.0572	NA	NA	NA	32.6382	25.2729	NA	20.5543	19.3352
NX5-N	Normal	UCEC	NA	17.1677	NA	13.5759	NA	NA	NA	NA	NA	NA	NA	NA	NA	NA	NA	NA	NA	NA	NA	NA	18.8299	NA	NA	NA	NA	NA	20.9116	19.3871	14.1645	NA	NA	NA	NA	NA	NA	NA	16.1373	NA	NA	NA	NA	NA	31.9844	24.544	NA	20.4433	NA
NX6-N	Normal	UCEC	NA	17.6611	NA	13.7041	NA	NA	NA	NA	NA	NA	NA	NA	NA	NA	NA	NA	NA	NA	NA	NA	19.2981	NA	NA	NA	NA	NA	20.9279	19.7999	15.4135	NA	NA	NA	NA	NA	NA	NA	16.823	NA	NA	NA	NA	NA	32.632	25.5201	NA	20.2729	NA
NX7-N	Normal	UCEC	NA	17.043	NA	13.5592	NA	NA	NA	NA	NA	NA	NA	NA	NA	NA	NA	NA	NA	NA	NA	NA	18.4719	NA	NA	NA	NA	NA	20.6921	19.1529	14.313	NA	NA	NA	NA	NA	NA	NA	16.0685	NA	NA	NA	NA	NA	32.5575	24.87	NA	20.3693	NA
NX8-N	Normal	UCEC	NA	17.7718	NA	NA	NA	17.6442	NA	21.363	NA	NA	NA	16.8198	NA	NA	NA	18.2075	15.1347	18.5981	NA	NA	NA	NA	NA	NA	NA	NA	19.6795	19.6677	NA	16.2448	NA	15.7969	NA	NA	NA	NA	16.6493	NA	17.4566	NA	NA	NA	32.5196	25.7633	NA	20.4966	19.8792
NX9-N	Normal	UCEC	NA	17.3944	NA	NA	NA	17.4411	NA	20.645	NA	NA	NA	16.6349	NA	NA	NA	17.628	14.6252	18.3722	NA	NA	NA	NA	NA	NA	NA	NA	19.4606	19.0522	NA	16.1031	NA	15.8257	NA	NA	NA	NA	16.1354	NA	16.8091	NA	NA	NA	32.5643	24.7794	NA	20.7536	20.1516
Withdrawn C3L-03747-T	Tumor	GBM	18.554	16.979	-1.06855	NA	NA	NA	NA	NA	NA	14.4226	NA	NA	NA	NA	NA	18.6645	NA	NA	NA	NA	NA	NA	NA	NA	NA	16.3575	17.9876	NA	NA	NA	NA	NA	NA	NA	NA	NA	NA	17.4626	NA	NA	NA	NA	32.3288	25.8171	NA	NA	19.2433
[truncated: 13 more columns]
