# Supplementary material for: Stabilization of GTSE1 by cyclin D1–CDK4/6-mediated phosphorylation promotes cell proliferation with implications for cancer prognosis
Source: eLife. 2025 Apr 24;13:RP101075. doi: 10.7554/eLife.101075 (PMC12021411; doi:10.7554/eLife.101075)
Supplement: Figure 2—source data 4. [file elife-101075-fig2-data4.xlsx]

## Sheet: GTSE1_row_zscore
Figure 2-source data 4. Row Z-score of GTSE1 log2(Intensities) across samples for global protein and phospho-protein (Fig. 2I-J and Supp Fig. 3C)
	11BR047-T	11BR043-T	11BR049-T	11BR023-T	18BR010-T	06BR003-T	11BR074-T	18BR017-T	01BR017-T	06BR006-T	09BR005-T	11BR017-T	01BR015-T	11BR025-T	01BR001-T	11BR031-T	01BR032-T	05BR045-T	11BR053-T	01BR027-T	14BR008-T	18BR002-T	03BR013-T	11BR032-T	21BR010-T	03BR004-T	11BR003-T	11BR028-T	18BR004-T	20BR005-T	11BR073-T	11BR009-T	18BR019-T	20BR001-T	09BR007-T	11BR020-T	20BR002-T	11BR019-T	20BR008-T	01BR033-T	11BR022-T	11BR013-T	03BR010-T	20BR007-T	11BR030-T	18BR007-T	11BR050-T	05BR001-T	11BR014-T
GTSE1	-0.12567	0.392898	0.276229	0.438189	-0.0595303	0.0249196	-0.0109353	0.361279	0.160846	-0.616418	-0.0458637	0.167508	-0.423146	0.0697829	-0.488787	0.137649	0.556645	0.106457	0.900522	NA	NA	NA	NA	NA	0.113731	NA	NA	0.358931	0.156795	0.203413	0.277012	0.519988	0.028458	-0.365958	-0.142445	-0.064062	0.0156926	-0.00269376	-0.152637	-0.00965963	0.0179914	0.460285	-0.163731	0.890021	-0.12856	-0.259813	-0.622058	0.0150245	-0.724266
GTSE1-S157	0.623715	1.65771	0.892597	1.66266	0.56991	0.54856	0.225681	1.07484	0.623149	NA	NA	NA	NA	NA	NA	0.96229	NA	NA	NA	NA	NA	NA	NA	NA	0.630285	NA	NA	NA	NA	NA	NA	NA	NA	NA	NA	NA	0.333374	0.988046	0.596983	0.789493	0.837148	1.39248	0.857132	1.99074	1.06903	0.563901	0.57104	1.07456	0.171092
GTSE1-S171	NA	NA	NA	NA	NA	NA	NA	NA	NA	NA	NA	NA	NA	NA	NA	NA	NA	NA	0.551107	NA	NA	NA	NA	NA	1.11994	NA	NA	NA	NA	NA	NA	NA	NA	NA	NA	NA	NA	NA	NA	NA	NA	NA	NA	NA	NA	NA	NA	NA	NA
GTSE1-S187	NA	NA	NA	NA	NA	NA	NA	NA	NA	NA	NA	NA	NA	NA	NA	NA	NA	NA	NA	NA	NA	NA	NA	NA	-0.231066	NA	NA	NA	NA	NA	NA	NA	NA	NA	NA	NA	NA	NA	NA	NA	NA	NA	NA	NA	NA	NA	NA	NA	NA
GTSE1-S247	NA	NA	NA	NA	NA	NA	NA	NA	NA	NA	NA	NA	NA	NA	NA	NA	NA	NA	NA	NA	NA	NA	NA	NA	NA	NA	NA	NA	NA	NA	NA	NA	NA	NA	NA	NA	NA	NA	NA	NA	NA	NA	NA	NA	NA	NA	NA	NA	NA
GTSE1-S262	-0.418481	0.536178	0.188695	0.641546	-0.314661	0.264663	-0.284855	0.599847	-0.100155	NA	NA	NA	NA	NA	NA	-0.616526	NA	NA	-0.0447352	NA	NA	NA	NA	NA	-0.299183	NA	NA	0.042182	-0.0661822	0.816039	-0.0172477	1.5898	0.359297	0.000728947	-0.0576628	0.00506775	-0.933804	-1.23383	-0.636442	-1.0467	-1.13657	-1.45156	-1.27745	-0.560139	NA	NA	NA	NA	NA
GTSE1-S264	NA	NA	NA	NA	NA	NA	NA	NA	NA	NA	NA	NA	NA	NA	NA	NA	NA	NA	1.05209	1.35113	0.38121	0.889127	0.67605	0.708021	0.351017	0.819748	1.13068	NA	NA	NA	NA	NA	NA	NA	NA	NA	NA	NA	NA	NA	NA	NA	NA	NA	NA	NA	NA	NA	NA
GTSE1-S322	NA	NA	NA	NA	NA	NA	NA	NA	NA	NA	NA	NA	NA	NA	NA	NA	NA	NA	NA	NA	NA	NA	NA	NA	NA	NA	NA	NA	NA	NA	NA	NA	NA	NA	NA	NA	NA	NA	NA	NA	NA	NA	NA	NA	NA	NA	NA	NA	NA
GTSE1-S330	NA	NA	NA	NA	NA	NA	NA	NA	NA	NA	NA	NA	NA	NA	NA	NA	NA	NA	NA	NA	NA	NA	NA	NA	NA	NA	NA	NA	NA	NA	NA	NA	NA	NA	NA	NA	NA	NA	NA	NA	NA	NA	NA	NA	NA	NA	NA	NA	NA
GTSE1-S331	NA	NA	NA	NA	NA	NA	NA	NA	NA	NA	NA	NA	NA	NA	NA	NA	NA	NA	NA	NA	NA	NA	NA	NA	NA	NA	NA	NA	NA	NA	NA	NA	NA	NA	NA	NA	NA	NA	NA	NA	NA	NA	NA	NA	NA	NA	NA	NA	NA
GTSE1-S345	NA	NA	NA	NA	NA	NA	NA	NA	NA	NA	NA	NA	NA	NA	NA	NA	NA	NA	NA	NA	NA	NA	NA	NA	NA	NA	NA	NA	NA	NA	NA	NA	NA	NA	NA	NA	NA	NA	NA	NA	NA	NA	NA	NA	NA	NA	NA	NA	NA
GTSE1-S415	NA	NA	NA	NA	NA	NA	NA	NA	NA	NA	NA	NA	NA	NA	NA	NA	NA	NA	NA	NA	NA	NA	NA	NA	NA	NA	NA	NA	NA	NA	NA	NA	NA	NA	NA	NA	NA	NA	NA	NA	NA	NA	NA	NA	NA	NA	NA	NA	NA
GTSE1-S434	NA	NA	NA	NA	NA	NA	NA	NA	NA	NA	NA	NA	NA	NA	NA	NA	NA	NA	NA	NA	NA	NA	NA	NA	NA	NA	NA	NA	NA	NA	NA	NA	NA	NA	NA	NA	NA	NA	NA	NA	NA	NA	NA	NA	NA	NA	NA	NA	NA
GTSE1-S454	NA	NA	NA	NA	NA	NA	NA	NA	NA	NA	NA	NA	NA	NA	NA	0.0461449	NA	NA	0.594912	1.08519	-0.638887	0.103085	1.15897	0.599852	-0.180065	0.344215	0.633381	NA	NA	NA	NA	NA	NA	NA	NA	NA	-1.09666	0.964484	-0.00236937	0.23968	0.515816	0.915346	-0.0808116	1.65883	0.369777	-0.543008	-0.0519691	0.715686	-0.194634
GTSE1-S476	NA	NA	NA	NA	NA	NA	NA	NA	NA	NA	NA	NA	NA	NA	NA	NA	NA	NA	NA	NA	NA	NA	NA	NA	NA	NA	NA	NA	NA	NA	NA	NA	NA	NA	NA	NA	NA	NA	NA	NA	NA	NA	NA	NA	NA	NA	NA	NA	NA
GTSE1-S480	NA	NA	NA	NA	NA	NA	NA	NA	NA	NA	NA	NA	NA	NA	NA	-0.164359	NA	NA	NA	NA	NA	NA	NA	NA	NA	NA	NA	NA	NA	NA	NA	NA	NA	NA	NA	NA	0.28008	-0.256484	-0.443027	-0.293248	-0.239454	0.100346	-0.876531	0.37783	0.0462549	-0.227193	-0.6596	-0.252519	-0.552762
GTSE1-S480T485	NA	NA	NA	NA	NA	NA	NA	NA	NA	NA	NA	NA	NA	NA	NA	NA	NA	NA	NA	NA	NA	NA	NA	NA	NA	NA	NA	NA	NA	NA	NA	NA	NA	NA	NA	NA	NA	NA	NA	NA	NA	NA	NA	NA	NA	NA	NA	NA	NA
GTSE1-S483	NA	NA	NA	NA	NA	NA	NA	NA	NA	NA	NA	NA	NA	NA	NA	NA	NA	NA	NA	NA	NA	NA	NA	NA	NA	NA	NA	NA	NA	NA	NA	NA	NA	NA	NA	NA	NA	NA	NA	NA	NA	NA	NA	NA	NA	NA	NA	NA	NA
GTSE1-S496	-0.649741	1.31197	-0.123526	-0.0740462	-0.733641	-0.921354	-0.713448	0.591462	0.0853912	-0.737858	-0.918126	1.28531	-0.657659	-0.593672	-0.319308	-0.871652	0.868584	0.328002	NA	NA	NA	NA	NA	NA	-0.426616	NA	NA	NA	NA	NA	NA	NA	NA	NA	NA	NA	NA	NA	NA	NA	NA	NA	NA	NA	NA	NA	NA	NA	NA
GTSE1-S499	NA	NA	NA	NA	NA	NA	NA	NA	NA	NA	NA	NA	NA	NA	NA	NA	NA	NA	NA	NA	NA	NA	NA	NA	NA	NA	NA	NA	NA	NA	NA	NA	NA	NA	NA	NA	NA	NA	NA	NA	NA	NA	NA	NA	NA	NA	NA	NA	NA
GTSE1-S514	NA	NA	NA	NA	NA	NA	NA	NA	NA	NA	NA	NA	NA	NA	NA	NA	NA	NA	NA	NA	NA	NA	NA	NA	NA	NA	NA	NA	NA	NA	NA	NA	NA	NA	NA	NA	NA	NA	NA	NA	NA	NA	NA	NA	NA	NA	NA	NA	NA
GTSE1-S539	NA	NA	NA	NA	NA	NA	NA	NA	NA	NA	NA	NA	NA	NA	NA	NA	NA	NA	NA	NA	NA	NA	NA	NA	NA	NA	NA	NA	NA	NA	NA	NA	NA	NA	NA	NA	NA	NA	NA	NA	NA	NA	NA	NA	NA	NA	NA	NA	NA
GTSE1-S555	NA	NA	NA	NA	NA	NA	NA	NA	NA	1.01171	0.270157	0.995748	0.15236	0.00950956	0.715535	0.281297	0.41114	0.636997	NA	NA	NA	NA	NA	NA	0.510017	NA	NA	NA	NA	NA	NA	NA	NA	NA	NA	NA	0.96503	0.429435	0.117132	0.155727	0.112396	0.778034	-0.00136073	1.15637	NA	NA	NA	NA	NA
GTSE1-S582	NA	NA	NA	NA	NA	NA	NA	NA	NA	NA	NA	NA	NA	NA	NA	NA	NA	NA	NA	NA	NA	NA	NA	NA	NA	NA	NA	NA	NA	NA	NA	NA	NA	NA	NA	NA	NA	NA	NA	NA	NA	NA	NA	NA	NA	NA	NA	NA	NA
GTSE1-S594	0.331563	0.924324	0.429774	0.666817	0.453681	0.422021	0.406483	1.04935	0.766467	0.571611	0.509258	0.847014	0.260338	0.792617	0.0204423	0.251398	1.32549	0.308055	0.586188	NA	NA	NA	NA	NA	0.504533	NA	NA	0.818547	0.263801	0.718468	0.45633	1.52341	0.282732	0.200353	0.56727	0.319384	0.758241	0.365907	0.409052	0.618266	0.349242	0.957591	0.24407	1.36069	0.642044	0.826211	0.731834	0.15178	0.11184
GTSE1-S594S599	-0.81438	0.0430811	-0.0680475	-0.311788	0.0061098	-0.299889	0.164705	0.21995	0.97494	NA	NA	NA	NA	NA	NA	-0.191914	NA	NA	0.0239907	NA	NA	NA	NA	NA	-0.0616412	NA	NA	0.259655	-0.214598	0.250074	0.0768126	1.12905	-0.217876	-0.229461	-0.0627169	-0.277465	0.296995	0.075753	-0.579857	-0.206947	-0.0525229	0.510539	-0.984894	0.749911	-0.341525	-0.19271	-0.451473	0.237825	-0.727212
GTSE1-S594S599S602	NA	NA	NA	NA	NA	NA	NA	NA	NA	NA	NA	NA	NA	NA	NA	NA	NA	NA	NA	NA	NA	NA	NA	NA	NA	NA	NA	NA	NA	NA	NA	NA	NA	NA	NA	NA	NA	NA	NA	NA	NA	NA	NA	NA	NA	NA	NA	NA	NA
GTSE1-S594S602	NA	NA	NA	NA	NA	NA	NA	NA	NA	NA	NA	NA	NA	NA	NA	NA	NA	NA	NA	NA	NA	NA	NA	NA	NA	NA	NA	NA	NA	NA	NA	NA	NA	NA	NA	NA	NA	NA	NA	NA	NA	NA	NA	NA	NA	NA	NA	NA	NA
GTSE1-S594S611	NA	NA	NA	NA	NA	NA	NA	NA	NA	NA	NA	NA	NA	NA	NA	NA	NA	NA	NA	NA	NA	NA	NA	NA	NA	NA	NA	NA	NA	NA	NA	NA	NA	NA	NA	NA	NA	NA	NA	NA	NA	NA	NA	NA	NA	NA	NA	NA	NA
GTSE1-S599	NA	NA	NA	NA	NA	NA	NA	NA	NA	NA	NA	NA	NA	NA	NA	NA	NA	NA	NA	NA	NA	NA	NA	NA	NA	NA	NA	0.230789	-0.821454	-0.0474624	0.0158473	0.284241	-0.587044	-0.733906	-0.289134	-0.455463	NA	NA	NA	NA	NA	NA	NA	NA	NA	NA	NA	NA	NA
GTSE1-S599S602	NA	NA	NA	NA	NA	NA	NA	NA	NA	NA	NA	NA	NA	NA	NA	NA	NA	NA	NA	NA	NA	NA	NA	NA	NA	NA	NA	NA	NA	NA	NA	NA	NA	NA	NA	NA	NA	NA	NA	NA	NA	NA	NA	NA	1.32251	1.22854	0.88904	1.66311	-0.623385
GTSE1-S599S602S611	NA	NA	NA	NA	NA	NA	NA	NA	NA	NA	NA	NA	NA	NA	NA	NA	NA	NA	NA	NA	NA	NA	NA	NA	NA	NA	NA	NA	NA	NA	NA	NA	NA	NA	NA	NA	NA	NA	NA	NA	NA	NA	NA	NA	NA	NA	NA	NA	NA
GTSE1-S602	NA	NA	NA	NA	NA	NA	NA	NA	NA	NA	NA	NA	NA	NA	NA	NA	NA	NA	NA	NA	NA	NA	NA	NA	-0.802235	NA	NA	NA	NA	NA	NA	NA	NA	NA	NA	NA	NA	NA	NA	NA	NA	NA	NA	NA	NA	NA	NA	NA	NA
GTSE1-S602S611	NA	NA	NA	NA	NA	NA	NA	NA	NA	NA	NA	NA	NA	NA	NA	NA	NA	NA	NA	NA	NA	NA	NA	NA	NA	NA	NA	NA	NA	NA	NA	NA	NA	NA	NA	NA	NA	NA	NA	NA	NA	NA	NA	NA	NA	NA	NA	NA	NA
GTSE1-S611	NA	NA	NA	NA	NA	NA	NA	NA	NA	NA	NA	NA	NA	NA	NA	NA	NA	NA	NA	NA	NA	NA	NA	NA	NA	NA	NA	NA	NA	NA	NA	NA	NA	NA	NA	NA	NA	NA	NA	NA	NA	NA	NA	NA	-0.835374	-0.722551	-0.964025	-0.673065	-0.629599
GTSE1-S724	NA	NA	NA	NA	NA	NA	NA	NA	NA	NA	NA	NA	NA	NA	NA	-0.50243	NA	NA	NA	NA	NA	NA	NA	NA	NA	NA	NA	NA	NA	NA	NA	NA	NA	NA	NA	NA	1.21722	-0.565607	NA	NA	NA	NA	NA	0.868449	NA	NA	NA	NA	NA
GTSE1-S734	NA	NA	NA	NA	NA	NA	NA	NA	NA	NA	NA	NA	NA	NA	NA	NA	NA	NA	NA	NA	NA	NA	NA	NA	NA	NA	NA	NA	NA	NA	NA	NA	NA	NA	NA	NA	NA	NA	NA	NA	NA	NA	NA	NA	NA	NA	NA	NA	NA
GTSE1-T200	NA	NA	NA	NA	NA	NA	NA	NA	NA	NA	NA	NA	NA	NA	NA	NA	NA	NA	NA	NA	NA	NA	NA	NA	NA	NA	NA	NA	NA	NA	NA	NA	NA	NA	NA	NA	NA	NA	NA	NA	NA	NA	NA	NA	NA	NA	NA	NA	NA
GTSE1-T344	NA	NA	NA	NA	NA	NA	NA	NA	NA	NA	NA	NA	NA	NA	NA	0.126408	NA	NA	NA	NA	NA	NA	NA	NA	NA	NA	NA	NA	NA	NA	NA	NA	NA	NA	NA	NA	1.27725	0.0615175	0.574969	-0.12674	0.615425	0.477037	-0.0323749	1.1384	NA	NA	NA	NA	NA
GTSE1-T508	NA	NA	NA	NA	NA	NA	NA	NA	NA	NA	NA	NA	NA	NA	NA	NA	NA	NA	NA	NA	NA	NA	NA	NA	NA	NA	NA	NA	NA	NA	NA	NA	NA	NA	NA	NA	NA	NA	NA	NA	NA	NA	NA	NA	-0.295992	-0.443946	-0.423856	-0.087664	-0.55231
[truncated: 1,652 more columns]
