# Supplementary material for: Stabilization of GTSE1 by cyclin D1–CDK4/6-mediated phosphorylation promotes cell proliferation with implications for cancer prognosis
Source: eLife. 2025 Apr 24;13:RP101075. doi: 10.7554/eLife.101075 (PMC12021411; doi:10.7554/eLife.101075)
Supplement: Figure 4—figure supplement 1—source data 1. [file elife-101075-fig4-figsupp1-data1.xlsx]

## Sheet: GTSE1~Hallmark (protein)
Figure 4- supplemental figure 1- Source data 1. Pairwise GTSE1 (protein) ~ Hallmark (protein) spearman correlations from proteomic input (Fig. 4-figure supplement 1A)
protein_of_interest	hallmark_protein	cor	p	log_pval	log10_pval	qval	cohort_code
GTSE1	VIM	-0.42	3.48e-06	5.45842	5.34872	1.836e-05	BRCA
GTSE1	MCM2	0.57	0	Inf	6	0	BRCA
GTSE1	PCNA	0.52	2.71e-09	8.56703	5.99882	1.80274e-08	BRCA
GTSE1	ETS1	0.049	0.602	0.220404	0.220403	0.703099	BRCA
GTSE1	MKI67	0.53	1.34e-09	8.8729	5.99942	9.76286e-09	BRCA
GTSE1	CDH2	-0.19	0.0662	1.17914	1.17914	0.104419	BRCA
GTSE1	JUN	0.017	0.853	0.069051	0.0690505	0.91265	BRCA
GTSE1	NF2	-0.054	0.566	0.247184	0.247183	0.666138	BRCA
GTSE1	MMP1	-0.00052	0.996	0.00174066	0.00174023	0.996	BRCA
GTSE1	VIM	0.081	0.647	0.189096	0.189095	0.906689	CCRCC
GTSE1	MCM2	0.073	0.679	0.16813	0.16813	0.906689	CCRCC
GTSE1	PCNA	-0.18	0.318	0.497573	0.497572	0.83952	CCRCC
GTSE1	ETS1	0.13	0.515	0.288193	0.288192	0.906689	CCRCC
GTSE1	MKI67	0.29	0.129	0.88941	0.889407	0.608143	CCRCC
GTSE1	CDH2	-0.052	0.769	0.114074	0.114073	0.906689	CCRCC
GTSE1	JUN	-0.19	0.308	0.511449	0.511448	0.83952	CCRCC
GTSE1	NF2	-0.35	0.0456	1.34104	1.34103	0.30096	CCRCC
GTSE1	VIM	-0.14	0.295	0.530178	0.530177	0.483984	GBM
GTSE1	MCM2	0.53	5.69e-05	4.24489	4.23732	0.00059745	GBM
GTSE1	PCNA	0.43	0.00136	2.86646	2.86614	0.00952	GBM
GTSE1	ETS1	0.26	0.0589	1.22988	1.22988	0.150841	GBM
GTSE1	MKI67	0.65	3.18e-07	6.49757	5.88008	4.17375e-06	GBM
GTSE1	CDH2	-0.0077	0.956	0.0195421	0.0195417	0.966202	GBM
GTSE1	JUN	0.24	0.0784	1.10568	1.10568	0.178957	GBM
GTSE1	NF2	0.27	0.0455	1.34199	1.34198	0.1225	GBM
GTSE1	VIM	-0.27	0.0177	1.75203	1.752	0.0461739	HNSCC
GTSE1	MCM2	0.53	6.56e-07	6.1831	5.78094	6.05538e-06	HNSCC
GTSE1	PCNA	0.48	1.04e-05	4.98297	4.9431	7.34118e-05	HNSCC
GTSE1	ETS1	-0.22	0.0571	1.24336	1.24336	0.107063	HNSCC
GTSE1	MKI67	0.33	0.00311	2.50724	2.5071	0.0100865	HNSCC
GTSE1	CDH2	-0.091	0.575	0.240332	0.240331	0.669903	HNSCC
GTSE1	JUN	0.14	0.202	0.694649	0.694646	0.288571	HNSCC
GTSE1	NF2	-0.11	0.333	0.477556	0.477554	0.41625	HNSCC
GTSE1	MMP1	0.14	0.206	0.686133	0.686131	0.290824	HNSCC
GTSE1	VIM	-0.29	0.00194	2.7122	2.71197	0.00582	LSCC
GTSE1	MCM2	0.45	8.6e-07	6.0655	5.73049	5.07103e-06	LSCC
GTSE1	PCNA	0.43	3.22e-06	5.49214	5.37469	1.72069e-05	LSCC
GTSE1	ETS1	-0.34	0.000302	3.51999	3.51856	0.00109877	LSCC
GTSE1	MKI67	0.4	2.02e-05	4.69465	4.67366	8.6355e-05	LSCC
GTSE1	CDH2	0.18	0.0811	1.09098	1.09097	0.152397	LSCC
GTSE1	JUN	0.09	0.352	0.453457	0.453456	0.489366	LSCC
GTSE1	NF2	-0.0088	0.927	0.0329203	0.0329198	0.954922	LSCC
GTSE1	MMP1	-0.18	0.0566	1.24718	1.24718	0.111248	LSCC
GTSE1	VIM	-0.3	0.00306	2.51428	2.51414	0.00918	LUAD
GTSE1	MCM2	0.66	0	Inf	6	0	LUAD
GTSE1	PCNA	0.55	8.6e-09	8.0655	5.99628	6.07059e-08	LUAD
GTSE1	ETS1	-0.025	0.807	0.0931265	0.0931259	0.875478	LUAD
GTSE1	MKI67	0.73	0	Inf	6	0	LUAD
GTSE1	CDH2	0.25	0.0309	1.51004	1.51003	0.0713077	LUAD
GTSE1	JUN	0.18	0.0847	1.07212	1.07211	0.166623	LUAD
GTSE1	NF2	-0.24	0.0181	1.74232	1.7423	0.0462128	LUAD
GTSE1	MMP1	0.22	0.0295	1.53018	1.53016	0.0694118	LUAD
GTSE1	VIM	0.13	0.437	0.359519	0.359518	0.708367	PDA
GTSE1	MCM2	-0.059	0.715	0.145694	0.145693	0.900656	PDA
GTSE1	PCNA	-0.1	0.52	0.283997	0.283996	0.751111	PDA
GTSE1	ETS1	-0.05	0.778	0.10902	0.10902	0.905731	PDA
GTSE1	MKI67	0.055	0.736	0.133122	0.133122	0.900656	PDA
GTSE1	CDH2	-0.0067	0.97	0.0132283	0.0132278	0.973	PDA
GTSE1	JUN	-0.06	0.739	0.131356	0.131355	0.900656	PDA
GTSE1	NF2	0.009	0.956	0.0195421	0.0195417	0.973	PDA
GTSE1	MMP1	0.24	0.14	0.853872	0.853869	0.303333	PDA
GTSE1	VIM	-0.23	0.102	0.9914	0.991396	0.148916	UCEC
GTSE1	MCM2	0.37	0.00607	2.21681	2.21674	0.0134889	UCEC
GTSE1	PCNA	0.48	0.000298	3.52578	3.52433	0.00102171	UCEC
GTSE1	ETS1	0.39	0.00795	2.09963	2.09958	0.0173455	UCEC
GTSE1	MKI67	0.39	0.00423	2.37366	2.37356	0.00976154	UCEC
GTSE1	CDH2	0.074	0.597	0.224026	0.224025	0.657248	UCEC
GTSE1	JUN	0.21	0.131	0.882729	0.882725	0.18069	UCEC
GTSE1	NF2	0.024	0.862	0.0644927	0.0644922	0.87661	UCEC
