# Supplementary material for: Stabilization of GTSE1 by cyclin D1–CDK4/6-mediated phosphorylation promotes cell proliferation with implications for cancer prognosis
Source: eLife. 2025 Apr 24;13:RP101075. doi: 10.7554/eLife.101075 (PMC12021411; doi:10.7554/eLife.101075)
Supplement: Figure 4—source data 1. [file elife-101075-fig4-data1.xlsx]

## Sheet: GTSE1~Hallmark (phospho)
Figure 4-source data 1. Pairwise GTSE1 (phospho) ~ Hallmark (protein) spearman correlations from proteomic input (Fig. 4A)
protein_of_interest	hallmark_protein	cor	p	log_pval	log10_pval	qval	cohort_code
pGTSE1	VIM	-0.22	0.0169	1.77211	1.77209	0.031412	BRCA
pGTSE1	MCM2	0.49	9.61e-09	8.01728	5.99585	6.32042e-08	BRCA
pGTSE1	PCNA	0.47	5.39e-08	7.26841	5.9772	3.21362e-07	BRCA
pGTSE1	ETS1	0.18	0.0425	1.37161	1.3716	0.0685613	BRCA
pGTSE1	MKI67	0.4	4.52e-06	5.34486	5.25806	2.08897e-05	BRCA
pGTSE1	CDH2	-0.3	0.00162	2.79048	2.79022	0.00494679	BRCA
pGTSE1	JUN	0.047	0.602	0.220404	0.220403	0.695554	BRCA
pGTSE1	NF2	-0.096	0.292	0.534617	0.534616	0.38707	BRCA
pGTSE1	MMP1	0.063	0.489	0.310691	0.31069	0.588866	BRCA
pGTSE1	VIM	-0.1	0.325	0.488117	0.488115	0.418256	COAD
pGTSE1	MCM2		0.584	0.233587	0.233586	0.65551	COAD
pGTSE1	PCNA	0.13	0.216	0.665546	0.665544	0.349412	COAD
pGTSE1	MKI67	0.24	0.0201	1.6968	1.69678	0.0526429	COAD
pGTSE1	CDH2	0.14	0.251	0.600326	0.600325	0.367632	COAD
pGTSE1	NF2	-0.097	0.397	0.401209	0.401208	0.485222	COAD
pGTSE1	MMP1	0.13	0.236	0.627088	0.627086	0.360556	COAD
pGTSE1	VIM	-0.095	0.344	0.463442	0.46344	0.528608	GBM
pGTSE1	MCM2	0.42	1.47e-05	4.83268	4.8041	0.000147	GBM
pGTSE1	PCNA	0.43	7.84e-06	5.10568	5.05355	9.34909e-05	GBM
pGTSE1	ETS1	0.25	0.018	1.74473	1.7447	0.0553846	GBM
pGTSE1	MKI67	0.45	2.66e-06	5.57512	5.43652	3.54667e-05	GBM
pGTSE1	CDH2	-0.16	0.104	0.982967	0.982962	0.208	GBM
pGTSE1	JUN	0.41	3.09e-05	4.51004	4.49621	0.000285231	GBM
pGTSE1	NF2	0.14	0.175	0.756962	0.756959	0.323077	GBM
pGTSE1	VIM	-0.17	0.0786	1.10458	1.10457	0.144454	HNSCC
pGTSE1	MCM2	0.11	0.269	0.570248	0.570246	0.351769	HNSCC
pGTSE1	PCNA	0.31	0.00115	2.9393	2.93892	0.00446857	HNSCC
pGTSE1	ETS1	-0.14	0.156	0.806875	0.806873	0.238382	HNSCC
pGTSE1	MKI67	0.16	0.0937	1.02826	1.02826	0.167674	HNSCC
pGTSE1	CDH2	-0.0036	0.979	0.00921731	0.00921686	0.979	HNSCC
pGTSE1	JUN	0.15	0.132	0.879426	0.879423	0.2128	HNSCC
pGTSE1	NF2	-0.11	0.26	0.585027	0.585025	0.347262	HNSCC
pGTSE1	MMP1	0.14	0.135	0.869666	0.869663	0.213488	HNSCC
pGTSE1	VIM	-0.056	0.562	0.250264	0.250263	0.721486	LSCC
pGTSE1	MCM2	0.23	0.0146	1.83565	1.83562	0.0369867	LSCC
pGTSE1	PCNA	0.23	0.0163	1.78781	1.78779	0.0404675	LSCC
pGTSE1	ETS1	-0.12	0.231	0.636388	0.636386	0.359754	LSCC
pGTSE1	MKI67	0.32	0.000707	3.15058	3.14997	0.00248759	LSCC
pGTSE1	CDH2	0.039	0.698	0.156145	0.156144	0.810976	LSCC
pGTSE1	JUN	-0.018	0.848	0.0716041	0.0716036	0.899333	LSCC
pGTSE1	NF2	0.062	0.52	0.283997	0.283996	0.686111	LSCC
pGTSE1	MMP1	0.034	0.723	0.140862	0.140861	0.82753	LSCC
pGTSE1	VIM	-0.11	0.249	0.603801	0.603799	0.418074	LUAD
pGTSE1	MCM2	0.37	7.35e-05	4.13371	4.12784	0.00039984	LUAD
pGTSE1	PCNA	0.33	0.000391	3.40782	3.40671	0.00166175	LUAD
pGTSE1	ETS1	0.026	0.784	0.105684	0.105683	0.871023	LUAD
pGTSE1	MKI67	0.26	0.00568	2.24565	2.24558	0.016793	LUAD
pGTSE1	CDH2	-0.1	0.352	0.453457	0.453456	0.526066	LUAD
pGTSE1	JUN	0.16	0.0949	1.02273	1.02273	0.18178	LUAD
pGTSE1	NF2	-0.083	0.388	0.411168	0.411167	0.567398	LUAD
pGTSE1	MMP1	0.11	0.256	0.59176	0.591758	0.421108	LUAD
pGTSE1	VIM	-0.21	0.0599	1.22257	1.22257	0.213257	OV
pGTSE1	MCM2	0.2	0.0622	1.20621	1.2062	0.213257	OV
pGTSE1	PCNA	0.21	0.0551	1.25885	1.25884	0.206625	OV
pGTSE1	ETS1	0.096	0.426	0.37059	0.370589	0.648571	OV
pGTSE1	MKI67	0.37	0.000539	3.26841	3.26761	0.00497538	OV
pGTSE1	CDH2	0.034	0.756	0.121478	0.121478	0.888932	OV
pGTSE1	JUN	0.17	0.18	0.744727	0.744725	0.394909	OV
pGTSE1	NF2	0.051	0.646	0.189767	0.189767	0.799175	OV
pGTSE1	MMP1	0.042	0.827	0.0824945	0.082494	0.92069	OV
pGTSE1	VIM	0.017	0.84	0.0757207	0.0757202	0.938854	PDA
pGTSE1	MCM2	0.14	0.0982	1.00789	1.00788	0.214933	PDA
pGTSE1	PCNA	0.15	0.072	1.14267	1.14266	0.177081	PDA
pGTSE1	ETS1	0.019	0.846	0.0726296	0.0726291	0.938854	PDA
pGTSE1	MKI67	0.083	0.328	0.484126	0.484125	0.573472	PDA
pGTSE1	CDH2	0.26	0.0113	1.94692	1.94688	0.0657222	PDA
pGTSE1	JUN	0.21	0.0395	1.4034	1.40339	0.119817	PDA
pGTSE1	NF2	-0.21	0.012	1.92082	1.92078	0.0657222	PDA
pGTSE1	MMP1	0.057	0.507	0.294992	0.294991	0.744145	PDA
pGTSE1	VIM	-0.03	0.764	0.116907	0.116906	0.816	UCEC
pGTSE1	MCM2	0.093	0.356	0.44855	0.448549	0.444183	UCEC
pGTSE1	PCNA	0.076	0.452	0.344862	0.344861	0.528889	UCEC
pGTSE1	ETS1	-0.19	0.0662	1.17914	1.17914	0.113965	UCEC
pGTSE1	MKI67	0.075	0.455	0.341989	0.341988	0.528889	UCEC
pGTSE1	CDH2	-0.01	0.921	0.0357404	0.0357399	0.934746	UCEC
pGTSE1	JUN	-0.22	0.0262	1.5817	1.58168	0.0531821	UCEC
pGTSE1	NF2	-0.012	0.902	0.0447935	0.044793	0.929333	UCEC
